# Supplementary material
Source: publisher figshare collection journal article supplement (https://acs.figshare.com/ndownloader/files/12080060)
Supplement: Supplementary file 1 [file 12080060]

 
data_JJcryst2
 
_audit_creation_method            'SHELXL-2017/1'
_shelx_SHELXL_version_number      '2017/1'
_chemical_name_systematic         ?
_chemical_name_common             ?
_chemical_melting_point           ?
_chemical_formula_moiety          ?
_chemical_formula_sum
 'C13 H14 O' 
_chemical_formula_weight          186.24

loop_
 _atom_type_symbol
 _atom_type_description
 _atom_type_scat_dispersion_real
 _atom_type_scat_dispersion_imag
 _atom_type_scat_source
 'C'  'C'   0.0033   0.0016
 'International Tables Vol C Tables 4.2.6.8 and 6.1.1.4'
 'H'  'H'   0.0000   0.0000
 'International Tables Vol C Tables 4.2.6.8 and 6.1.1.4'
 'O'  'O'   0.0106   0.0060
 'International Tables Vol C Tables 4.2.6.8 and 6.1.1.4'
 
_space_group_crystal_system       trigonal
_space_group_IT_number            148
_space_group_name_H-M_alt         'R -3 :H'
_space_group_name_Hall            '-R 3'
 
_shelx_space_group_comment
;
The symmetry employed for this shelxl refinement is uniquely defined
by the following loop, which should always be used as a source of
symmetry information in preference to the above space-group names.
They are only intended as comments.
;
 
loop_
 _space_group_symop_operation_xyz
 'x, y, z'
 '-y, x-y, z'
 '-x+y, -x, z'
 'x+2/3, y+1/3, z+1/3'
 '-y+2/3, x-y+1/3, z+1/3'
 '-x+y+2/3, -x+1/3, z+1/3'
 'x+1/3, y+2/3, z+2/3'
 '-y+1/3, x-y+2/3, z+2/3'
 '-x+y+1/3, -x+2/3, z+2/3'
 '-x, -y, -z'
 'y, -x+y, -z'
 'x-y, x, -z'
 '-x+2/3, -y+1/3, -z+1/3'
 'y+2/3, -x+y+1/3, -z+1/3'
 'x-y+2/3, x+1/3, -z+1/3'
 '-x+1/3, -y+2/3, -z+2/3'
 'y+1/3, -x+y+2/3, -z+2/3'
 'x-y+1/3, x+2/3, -z+2/3'
 
_cell_length_a                    23.4971(7)
_cell_length_b                    23.4971(7)
_cell_length_c                    10.1419(4)
_cell_angle_alpha                 90
_cell_angle_beta                  90
_cell_angle_gamma                 120
_cell_volume                      4849.3(3)
_cell_formula_units_Z             18
_cell_measurement_temperature     123(2)
_cell_measurement_reflns_used   9456
_cell_measurement_theta_min     2.2650
_cell_measurement_theta_max     31.0600
 
_exptl_crystal_description        block
_exptl_crystal_colour             colorless
_exptl_crystal_density_meas       ?
_exptl_crystal_density_method     ?
_exptl_crystal_density_diffrn     1.148          
_exptl_crystal_F_000              1800
_exptl_transmission_factor_min    ?
_exptl_transmission_factor_max    ?
_exptl_crystal_size_max           0.27
_exptl_crystal_size_mid           0.27
_exptl_crystal_size_min           0.17
_exptl_absorpt_coefficient_mu     0.071
_shelx_estimated_absorpt_T_min    ?
_shelx_estimated_absorpt_T_max    ?
_exptl_absorpt_correction_T_min                   0.96948
_exptl_absorpt_correction_T_max                   1.00000
_exptl_absorpt_correction_type            multi-scan
_exptl_absorpt_process_details
;
CrysAlisPro 1.171.38.46 (Rigaku Oxford Diffraction, 2015)
Empirical absorption correction using spherical harmonics,
 implemented in SCALE3 ABSPACK scaling algorithm.
;
_exptl_absorpt_special_details    ?
_diffrn_ambient_temperature       123(2)
_diffrn_radiation_wavelength      0.71073
_diffrn_radiation_type            MoK\a
_diffrn_source                    ?
_diffrn_measurement_method        dtproprofit.ref 
_diffrn_measurement_device_type 'dtrek-CrysAlisPro-abstract goniometer imported rigaku-d*trek images'
_diffrn_detector_area_resol_mean  ?
_diffrn_reflns_number             19938
_diffrn_reflns_av_unetI/netI      0.0291
_diffrn_reflns_av_R_equivalents   0.0594
_diffrn_reflns_limit_h_min        -30
_diffrn_reflns_limit_h_max        30
_diffrn_reflns_limit_k_min        -29
_diffrn_reflns_limit_k_max        30
_diffrn_reflns_limit_l_min        -13
_diffrn_reflns_limit_l_max        13
_diffrn_reflns_theta_min          2.836
_diffrn_reflns_theta_max          27.554
_diffrn_reflns_theta_full         25.242
_diffrn_measured_fraction_theta_max   0.998
_diffrn_measured_fraction_theta_full  0.998
_diffrn_reflns_Laue_measured_fraction_max    0.998
_diffrn_reflns_Laue_measured_fraction_full   0.998
_diffrn_reflns_point_group_measured_fraction_max   0.998
_diffrn_reflns_point_group_measured_fraction_full  0.998
_reflns_number_total              2488
_reflns_number_gt                 2100
_reflns_threshold_expression      'I > 2\s(I)'
_reflns_Friedel_coverage          0.000
_reflns_Friedel_fraction_max      .
_reflns_Friedel_fraction_full     .
 
_reflns_special_details
;
 Reflections were merged by SHELXL according to the crystal
 class for the calculation of statistics and refinement.
 
 _reflns_Friedel_fraction is defined as the number of unique
 Friedel pairs measured divided by the number that would be
 possible theoretically, ignoring centric projections and
 systematic absences.
;
 
_computing_data_collection     'CrysAlisPro 1.171.38.46 (Rigaku OD, 2015)'
_computing_cell_refinement     'CrysAlisPro 1.171.38.46 (Rigaku OD, 2015)'
_computing_data_reduction      'CrysAlisPro 1.171.38.46 (Rigaku OD, 2015)'
_computing_structure_solution   'SHELXL-2017/1 (Sheldrick, 2017)'
_computing_structure_refinement 'SHELXL-2017/1 (Sheldrick, 2017)'
_computing_molecular_graphics     ?
_computing_publication_material   ?
_refine_special_details           ?
_refine_ls_structure_factor_coef  Fsqd
_refine_ls_matrix_type            full
_refine_ls_weighting_scheme       calc
_refine_ls_weighting_details
'w=1/[\s^2^(Fo^2^)+(0.0430P)^2^+3.5368P] where P=(Fo^2^+2Fc^2^)/3'
_atom_sites_solution_primary      ?
_atom_sites_solution_secondary    ?
_atom_sites_solution_hydrogens    geom
_refine_ls_hydrogen_treatment     constr
_refine_ls_extinction_method      none
_refine_ls_extinction_coef        .
_refine_ls_number_reflns          2488
_refine_ls_number_parameters      128
_refine_ls_number_restraints      0
_refine_ls_R_factor_all           0.0542
_refine_ls_R_factor_gt            0.0447
_refine_ls_wR_factor_ref          0.1061
_refine_ls_wR_factor_gt           0.1012
_refine_ls_goodness_of_fit_ref    1.057
_refine_ls_restrained_S_all       1.057
_refine_ls_shift/su_max           0.001
_refine_ls_shift/su_mean          0.000
 
loop_
 _atom_site_label
 _atom_site_type_symbol
 _atom_site_fract_x
 _atom_site_fract_y
 _atom_site_fract_z
 _atom_site_U_iso_or_equiv
 _atom_site_adp_type
 _atom_site_occupancy
 _atom_site_site_symmetry_order  
 _atom_site_calc_flag
 _atom_site_refinement_flags_posn
 _atom_site_refinement_flags_adp
 _atom_site_refinement_flags_occupancy
 _atom_site_disorder_assembly
 _atom_site_disorder_group
C1 C 0.50296(5) 0.39333(5) 0.39133(11) 0.0257(3) Uani 1 1 d . . . . .
C2 C 0.47744(7) 0.40583(7) 0.27898(12) 0.0362(3) Uani 1 1 d . . . . .
H1 H 0.504762 0.441104 0.221863 0.043 Uiso 1 1 calc R U . . .
C3 C 0.41100(7) 0.36566(8) 0.25170(14) 0.0443(4) Uani 1 1 d . . . . .
H2 H 0.392530 0.373623 0.175456 0.053 Uiso 1 1 calc R U . . .
C4 C 0.37158(7) 0.31413(7) 0.33491(15) 0.0433(4) Uani 1 1 d . . . . .
H3 H 0.326403 0.286603 0.314234 0.052 Uiso 1 1 calc R U . . .
C5 C 0.39701(6) 0.30204(6) 0.44799(13) 0.0349(3) Uani 1 1 d . . . . .
H4 H 0.369556 0.266834 0.505119 0.042 Uiso 1 1 calc R U . . .
C6 C 0.46324(5) 0.34225(5) 0.47635(11) 0.0261(3) Uani 1 1 d . . . . .
C7 C 0.57330(5) 0.42664(5) 0.43823(11) 0.0263(3) Uani 1 1 d . . . . .
H5 H 0.594196 0.475335 0.427560 0.032 Uiso 1 1 calc R U . . .
C8 C 0.56589(5) 0.40847(5) 0.58672(11) 0.0268(3) Uani 1 1 d . . . . .
C9 C 0.50282(6) 0.34012(6) 0.59059(12) 0.0293(3) Uani 1 1 d . . . . .
H6 H 0.513349 0.304539 0.579325 0.035 Uiso 1 1 calc R U . . .
H7 H 0.478944 0.333419 0.674764 0.035 Uiso 1 1 calc R U . . .
O1 O 0.60921(4) 0.40286(4) 0.36537(9) 0.0360(2) Uani 1 1 d . . . . .
H8 H 0.584180 0.363212 0.345739 0.054 Uiso 1 1 calc R U . . .
C10 C 0.62534(7) 0.40829(7) 0.64555(15) 0.0423(3) Uani 1 1 d . . . . .
H9 H 0.663658 0.452617 0.640480 0.064 Uiso 1 1 calc R U . . .
H10 H 0.616476 0.394409 0.737972 0.064 Uiso 1 1 calc R U . . .
H11 H 0.634205 0.377715 0.596102 0.064 Uiso 1 1 calc R U . . .
C11 C 0.55380(6) 0.46010(6) 0.65681(12) 0.0315(3) Uani 1 1 d . . . . .
H12 H 0.594652 0.503341 0.652583 0.038 Uiso 1 1 calc R U . . .
H13 H 0.519351 0.463923 0.608099 0.038 Uiso 1 1 calc R U . . .
C12 C 0.53374(7) 0.44499(7) 0.79462(13) 0.0389(3) Uani 1 1 d . . . . .
C13 C 0.51621(8) 0.43171(10) 0.90492(14) 0.0549(4) Uani 1 1 d . . . . .
H14 H 0.502077 0.421015 0.993802 0.066 Uiso 1 1 calc R U . . .
 
loop_
 _atom_site_aniso_label
 _atom_site_aniso_U_11
 _atom_site_aniso_U_22
 _atom_site_aniso_U_33
 _atom_site_aniso_U_23
 _atom_site_aniso_U_13
 _atom_site_aniso_U_12
C1 0.0283(6) 0.0237(5) 0.0263(6) -0.0052(4) 0.0014(4) 0.0139(5)
C2 0.0487(8) 0.0370(7) 0.0278(6) -0.0062(5) -0.0034(5) 0.0250(6)
C3 0.0517(9) 0.0543(9) 0.0392(7) -0.0192(7) -0.0187(6) 0.0356(8)
C4 0.0298(7) 0.0474(8) 0.0557(9) -0.0268(7) -0.0131(6) 0.0216(6)
C5 0.0246(6) 0.0296(6) 0.0462(7) -0.0110(5) 0.0050(5) 0.0104(5)
C6 0.0241(5) 0.0235(5) 0.0303(6) -0.0060(4) 0.0033(4) 0.0115(5)
C7 0.0254(6) 0.0185(5) 0.0323(6) -0.0008(4) 0.0059(4) 0.0090(4)
C8 0.0249(6) 0.0246(5) 0.0314(6) -0.0021(4) -0.0018(4) 0.0127(5)
C9 0.0298(6) 0.0240(6) 0.0326(6) 0.0039(5) 0.0043(5) 0.0122(5)
O1 0.0289(4) 0.0248(4) 0.0488(6) -0.0054(4) 0.0139(4) 0.0092(4)
C10 0.0330(7) 0.0456(8) 0.0535(8) -0.0056(6) -0.0095(6) 0.0235(6)
C11 0.0339(6) 0.0313(6) 0.0314(6) -0.0077(5) -0.0049(5) 0.0178(5)
C12 0.0395(7) 0.0550(8) 0.0338(7) -0.0118(6) -0.0111(6) 0.0324(7)
C13 0.0640(10) 0.0951(13) 0.0287(7) -0.0066(7) -0.0074(7) 0.0572(10)
 
_geom_special_details
;
 All esds (except the esd in the dihedral angle between two l.s. planes)
 are estimated using the full covariance matrix.  The cell esds are taken
 into account individually in the estimation of esds in distances, angles
 and torsion angles; correlations between esds in cell parameters are only
 used when they are defined by crystal symmetry.  An approximate (isotropic)
 treatment of cell esds is used for estimating esds involving l.s. planes.
;
 
loop_
 _geom_bond_atom_site_label_1
 _geom_bond_atom_site_label_2
 _geom_bond_distance
 _geom_bond_site_symmetry_2
 _geom_bond_publ_flag
C1 C2 1.3859(17) . ?
C1 C6 1.3911(16) . ?
C1 C7 1.5089(15) . ?
C2 C3 1.390(2) . ?
C2 H1 0.9500 . ?
C3 C4 1.384(2) . ?
C3 H2 0.9500 . ?
C4 C5 1.387(2) . ?
C4 H3 0.9500 . ?
C5 C6 1.3882(16) . ?
C5 H4 0.9500 . ?
C6 C9 1.5020(17) . ?
C7 O1 1.4289(13) . ?
C7 C8 1.5513(16) . ?
C7 H5 1.0000 . ?
C8 C10 1.5210(16) . ?
C8 C9 1.5481(16) . ?
C8 C11 1.5501(16) . ?
C9 H6 0.9900 . ?
C9 H7 0.9900 . ?
O1 H8 0.8400 . ?
C10 H9 0.9800 . ?
C10 H10 0.9800 . ?
C10 H11 0.9800 . ?
C11 C12 1.4610(18) . ?
C11 H12 0.9900 . ?
C11 H13 0.9900 . ?
C12 C13 1.179(2) . ?
C13 H14 0.9500 . ?
 
loop_
 _geom_angle_atom_site_label_1
 _geom_angle_atom_site_label_2
 _geom_angle_atom_site_label_3
 _geom_angle
 _geom_angle_site_symmetry_1
 _geom_angle_site_symmetry_3
 _geom_angle_publ_flag
C2 C1 C6 121.18(11) . . ?
C2 C1 C7 128.84(11) . . ?
C6 C1 C7 109.91(10) . . ?
C1 C2 C3 118.55(13) . . ?
C1 C2 H1 120.7 . . ?
C3 C2 H1 120.7 . . ?
C4 C3 C2 120.41(13) . . ?
C4 C3 H2 119.8 . . ?
C2 C3 H2 119.8 . . ?
C3 C4 C5 121.01(12) . . ?
C3 C4 H3 119.5 . . ?
C5 C4 H3 119.5 . . ?
C4 C5 C6 118.90(12) . . ?
C4 C5 H4 120.5 . . ?
C6 C5 H4 120.5 . . ?
C5 C6 C1 119.93(11) . . ?
C5 C6 C9 129.74(11) . . ?
C1 C6 C9 110.32(10) . . ?
O1 C7 C1 109.99(9) . . ?
O1 C7 C8 113.65(9) . . ?
C1 C7 C8 102.72(9) . . ?
O1 C7 H5 110.1 . . ?
C1 C7 H5 110.1 . . ?
C8 C7 H5 110.1 . . ?
C10 C8 C9 113.04(10) . . ?
C10 C8 C11 110.51(10) . . ?
C9 C8 C11 110.20(9) . . ?
C10 C8 C7 113.88(10) . . ?
C9 C8 C7 103.16(9) . . ?
C11 C8 C7 105.60(9) . . ?
C6 C9 C8 103.50(9) . . ?
C6 C9 H6 111.1 . . ?
C8 C9 H6 111.1 . . ?
C6 C9 H7 111.1 . . ?
C8 C9 H7 111.1 . . ?
H6 C9 H7 109.0 . . ?
C7 O1 H8 109.5 . . ?
C8 C10 H9 109.5 . . ?
C8 C10 H10 109.5 . . ?
H9 C10 H10 109.5 . . ?
C8 C10 H11 109.5 . . ?
H9 C10 H11 109.5 . . ?
H10 C10 H11 109.5 . . ?
C12 C11 C8 114.30(10) . . ?
C12 C11 H12 108.7 . . ?
C8 C11 H12 108.7 . . ?
C12 C11 H13 108.7 . . ?
C8 C11 H13 108.7 . . ?
H12 C11 H13 107.6 . . ?
C13 C12 C11 178.52(18) . . ?
C12 C13 H14 180.0 . . ?
 
loop_
 _geom_torsion_atom_site_label_1
 _geom_torsion_atom_site_label_2
 _geom_torsion_atom_site_label_3
 _geom_torsion_atom_site_label_4
 _geom_torsion
 _geom_torsion_site_symmetry_1
 _geom_torsion_site_symmetry_2
 _geom_torsion_site_symmetry_3
 _geom_torsion_site_symmetry_4
 _geom_torsion_publ_flag
C6 C1 C2 C3 -0.69(17) . . . . ?
C7 C1 C2 C3 175.96(11) . . . . ?
C1 C2 C3 C4 -0.40(19) . . . . ?
C2 C3 C4 C5 1.1(2) . . . . ?
C3 C4 C5 C6 -0.62(19) . . . . ?
C4 C5 C6 C1 -0.46(17) . . . . ?
C4 C5 C6 C9 179.95(11) . . . . ?
C2 C1 C6 C5 1.13(17) . . . . ?
C7 C1 C6 C5 -176.09(10) . . . . ?
C2 C1 C6 C9 -179.21(10) . . . . ?
C7 C1 C6 C9 3.57(12) . . . . ?
C2 C1 C7 O1 -77.87(14) . . . . ?
C6 C1 C7 O1 99.07(11) . . . . ?
C2 C1 C7 C8 160.81(11) . . . . ?
C6 C1 C7 C8 -22.25(11) . . . . ?
O1 C7 C8 C10 35.31(13) . . . . ?
C1 C7 C8 C10 154.10(10) . . . . ?
O1 C7 C8 C9 -87.58(10) . . . . ?
C1 C7 C8 C9 31.21(10) . . . . ?
O1 C7 C8 C11 156.74(9) . . . . ?
C1 C7 C8 C11 -84.48(10) . . . . ?
C5 C6 C9 C8 -163.63(11) . . . . ?
C1 C6 C9 C8 16.75(12) . . . . ?
C10 C8 C9 C6 -152.83(10) . . . . ?
C11 C8 C9 C6 82.97(11) . . . . ?
C7 C8 C9 C6 -29.38(11) . . . . ?
C10 C8 C11 C12 -66.90(14) . . . . ?
C9 C8 C11 C12 58.75(13) . . . . ?
C7 C8 C11 C12 169.52(10) . . . . ?
 
loop_
 _geom_hbond_atom_site_label_D 
 _geom_hbond_atom_site_label_H 
 _geom_hbond_atom_site_label_A 
 _geom_hbond_distance_DH 
 _geom_hbond_distance_HA 
 _geom_hbond_distance_DA 
 _geom_hbond_angle_DHA 
 _geom_hbond_site_symmetry_A 
 _geom_hbond_publ_flag
O1 H8 O1  0.84 1.83 2.6682(9) 172.2 18_545 yes
 
_refine_diff_density_max    0.228
_refine_diff_density_min   -0.209
_refine_diff_density_rms    0.043

_shelx_res_file
;
TITL JJcryst2_a.res in R-3
    JJcryst2.res
    created by SHELXL-2017/1 at 00:16:50 on 05-Dec-2017
REM  Yadorkari-X generated
CELL 0.71073 23.4971 23.4971 10.1419 90.0000 90.0000 120.0000
ZERR 18.0 0.0007 0.0007 0.0004 0.0000 0.0000 0.0000
LATT 3
SYMM -Y, +X-Y, +Z
SYMM -X+Y, -X, +Z
REM  SPGR R-3 trigonal
SFAC C H O
UNIT 234 252 18
TEMP -150.0
L.S. 10
FMAP 2
PLAN -20
ACTA
CONF
HTAB
LIST 4
BOND $H
EQIV $1 1/3+X-Y, -1/3+X, 2/3-Z

HTAB O1 O1_$1

WGHT    0.043000    3.536800
FVAR       3.32878
C1    1    0.502965    0.393328    0.391325    11.00000    0.02828    0.02372 =
         0.02628   -0.00515    0.00138    0.01388
C2    1    0.477437    0.405834    0.278980    11.00000    0.04873    0.03702 =
         0.02777   -0.00624   -0.00338    0.02504
AFIX  43
H1    2    0.504762    0.441104    0.221863    11.00000   -1.20000
AFIX   0
C3    1    0.410999    0.365659    0.251699    11.00000    0.05169    0.05428 =
         0.03919   -0.01922   -0.01867    0.03561
AFIX  43
H2    2    0.392530    0.373623    0.175456    11.00000   -1.20000
AFIX   0
C4    1    0.371579    0.314126    0.334905    11.00000    0.02977    0.04743 =
         0.05570   -0.02682   -0.01314    0.02157
AFIX  43
H3    2    0.326403    0.286603    0.314234    11.00000   -1.20000
AFIX   0
C5    1    0.397008    0.302042    0.447994    11.00000    0.02461    0.02965 =
         0.04619   -0.01101    0.00497    0.01038
AFIX  43
H4    2    0.369556    0.266834    0.505119    11.00000   -1.20000
AFIX   0
C6    1    0.463243    0.342245    0.476353    11.00000    0.02405    0.02345 =
         0.03030   -0.00605    0.00326    0.01145
C7    1    0.573300    0.426643    0.438227    11.00000    0.02542    0.01853 =
         0.03225   -0.00076    0.00588    0.00904
AFIX  13
H5    2    0.594196    0.475335    0.427560    11.00000   -1.20000
AFIX   0
C8    1    0.565893    0.408466    0.586721    11.00000    0.02486    0.02463 =
         0.03139   -0.00214   -0.00178    0.01275
C9    1    0.502824    0.340124    0.590587    11.00000    0.02977    0.02399 =
         0.03258    0.00387    0.00429    0.01216
AFIX  23
H6    2    0.513349    0.304539    0.579325    11.00000   -1.20000
H7    2    0.478944    0.333419    0.674764    11.00000   -1.20000
AFIX   0
O1    3    0.609214    0.402861    0.365372    11.00000    0.02886    0.02484 =
         0.04881   -0.00536    0.01390    0.00920
AFIX 147
H8    2    0.584180    0.363212    0.345739    11.00000   -1.50000
AFIX   0
C10   1    0.625344    0.408286    0.645550    11.00000    0.03297    0.04565 =
         0.05353   -0.00562   -0.00953    0.02350
AFIX  33
H9    2    0.663658    0.452617    0.640480    11.00000   -1.50000
H10   2    0.616476    0.394409    0.737972    11.00000   -1.50000
H11   2    0.634205    0.377715    0.596102    11.00000   -1.50000
AFIX   0
C11   1    0.553804    0.460104    0.656809    11.00000    0.03390    0.03129 =
         0.03138   -0.00769   -0.00487    0.01777
AFIX  23
H12   2    0.594652    0.503341    0.652583    11.00000   -1.20000
H13   2    0.519351    0.463923    0.608099    11.00000   -1.20000
AFIX   0
C12   1    0.533740    0.444988    0.794620    11.00000    0.03948    0.05499 =
         0.03379   -0.01176   -0.01114    0.03236
C13   1    0.516205    0.431712    0.904922    11.00000    0.06398    0.09514 =
         0.02869   -0.00663   -0.00741    0.05716
AFIX 163
H14   2    0.502077    0.421015    0.993802    11.00000   -1.20000

AFIX   0
HKLF 4 1 1 0 0 0 1 0 0 0 1


REM  JJcryst2_a.res in R-3
REM R1 =  0.0447 for    2100 Fo > 4sig(Fo)  and  0.0542 for all    2488 data
REM    128 parameters refined using      0 restraints

END

WGHT      0.0430      3.5368

REM Instructions for potential hydrogen bonds
HTAB O1 O1_$1

REM Highest difference peak  0.228,  deepest hole -0.209,  1-sigma level  0.043
Q1    1   0.5378  0.4137  0.4159  11.00000  0.05    0.23
Q2    1   0.5377  0.3787  0.5943  11.00000  0.05    0.22
Q3    1   0.5664  0.4171  0.5171  11.00000  0.05    0.21
Q4    1   0.5609  0.4320  0.6218  11.00000  0.05    0.19
Q5    1   0.4802  0.3794  0.4485  11.00000  0.05    0.17
Q6    1   0.4951  0.4436  0.8455  11.00000  0.05    0.16
Q7    1   0.5640  0.3087  0.3450  11.00000  0.05    0.16
Q8    1   0.5394  0.4715  0.8463  11.00000  0.05    0.16
Q9    1   0.5930  0.4079  0.6202  11.00000  0.05    0.15
Q10   1   0.4853  0.3598  0.4244  11.00000  0.05    0.15
Q11   1   0.4781  0.3390  0.5384  11.00000  0.05    0.15
Q12   1   0.6367  0.3208  0.4656  11.00000  0.05    0.15
Q13   1   0.5031  0.4164  0.8151  11.00000  0.05    0.15
Q14   1   0.6667  0.3333  0.5423  10.33333  0.05    0.15
Q15   1   0.6531  0.3554  0.4704  11.00000  0.05    0.14
Q16   1   0.4416  0.3952  0.2943  11.00000  0.05    0.14
Q17   1   0.3333  0.6667  0.0950  10.33333  0.05    0.13
Q18   1   0.4895  0.4101  0.3508  11.00000  0.05    0.13
Q19   1   0.6208  0.3447  0.5722  11.00000  0.05    0.13
Q20   1   0.6672  0.4480  0.5937  11.00000  0.05    0.13
;
_shelx_res_checksum   61477

_shelx_hkl_file
;
   0   0  -3 500641. 4031.53
   0   0  -3 532944. 3945.06
   0   0   6 64593.9 1907.02
   0   0  -6 67110.8 1986.84
   0   0  -6 64286.1 2032.26
   0   0   6 63146.0 1987.62
   0   0  -9 7608.63 1062.30
   0   0   9 8405.08 922.735
   0   0  -9 7756.80 860.507
   0   0 -12 3680.57 881.599
  -1   1 -11 2762.45 766.183
   1   0 -11 4544.97 916.716
   1  -1  11 3881.52 730.914
   0   1  11 3975.72 724.708
   0  -1 -11 3356.02 685.875
  -1   0  11 2938.14 692.628
   0  -1 -11 4486.43 965.225
  -1   1 -11 4220.51 754.549
   0   1   8 714.958 277.092
   0  -1  -8 228.993 189.336
  -1   1  -8 336.105 317.406
  -1   0   8 511.581 272.207
   1   0  -8-8.79083 178.953
   1  -1   8 401.160 234.358
   0  -1  -8 347.585 246.086
   1   0  -8 252.773 154.687
  -1   1  -8 462.779 247.273
  -1   0   5 98238.2 2400.76
  -1   1  -5 84410.3 2352.84
   0  -1  -5 98379.3 2192.61
   1   0  -5 98376.7 2417.83
  -1   0   5 103302. 2135.57
   0  -1  -5 97962.3 2112.59
   0  -1  -5 93837.8 2532.56
   1   0  -5 93355.8 2476.97
  -1   1  -5 101815. 2326.90
   1   0  -5 99994.9 2170.51
   0   1   5 102320. 2223.15
   1  -1   5 92614.8 2145.14
   1  -1   5 94609.2 2217.08
   0   1   5 101342. 2096.36
  -1   1  -5 89986.5 2221.21
   1  -1   2 22726.7 740.382
  -1   0   2 20729.1 583.934
   1  -1   2 22239.2 678.050
  -1   0   2 22313.9 762.867
   0  -1  -2 16291.9 666.173
   1  -1   2 17498.1 645.453
   0   1   2 21873.5 605.107
  -1   1  -2 20440.3 641.383
   0  -1  -2 21756.8 605.465
   1   0  -2 22487.5 620.047
  -1   1  -2 22907.7 754.094
   0   1   2 22102.6 771.900
   0  -1  -2 22498.7 622.325
  -1   0   2 23311.4 759.140
   0   1   2 22754.4 626.772
  -1   1  -2 21874.8 735.646
   1   0  -2 21298.0 734.926
   1   0  -2 23969.0 793.313
   0   1  -4 76906.9 1909.03
   1  -1  -4 67794.8 1720.26
   0  -1   4 74592.0 1739.86
  -1   1   4 67337.3 1843.93
  -1   1   4 74249.0 1797.25
   1  -1  -4 75970.7 1573.41
  -1   0  -4 79190.4 2046.65
   0  -1   4 66813.7 1792.38
  -1   0  -4 69924.0 1702.75
   0   1  -4 68196.0 1674.68
   0   1  -4 72032.0 1903.55
   1  -1  -4 77273.3 2030.26
  -1   1   4 71278.7 1493.91
  -1   0  -4 75176.6 1656.12
   1   0   4 71980.9 1618.69
   1   0   4 71134.3 1690.62
   0  -1   4 77335.3 1883.40
   1   0   4 78529.8 2006.49
   0   1  -7 15363.9 1064.79
  -1   0  -7 14016.4 1025.30
  -1   1   7 14328.4 1056.69
   0  -1   7 15926.5 1118.70
   1   0   7 14237.6 979.046
   0   1  -7 13032.4 1136.48
   1  -1  -7 14468.5 956.553
  -1   0  -7 13778.8 991.771
  -1   0  -7 13184.3 1141.55
   1  -1  -7 15421.1 1241.42
  -1   1   7 15620.5 970.207
  -1   1  10 15221.5 1328.48
   1  -1 -10 11974.4 1389.67
   0  -1  10 13771.1 1277.56
   0   1 -10 13871.4 1244.73
  -1   0 -10 11353.3 1348.15
   0   1 -10 12291.3 1390.89
  -1   0 -10 12058.4 1154.32
   1   0  10 12931.7 1153.89
   1  -1 -10 10544.8 1015.74
   0   1 -13 346.993 569.934
   1  -1 -13-22.6255 482.939
  -1   0 -13 769.168 608.454
   1  -2  12 546.165 440.219
  -1   2 -12 393.667 386.105
   2  -1 -12-598.865 548.720
  -2   1  12 335.130 368.715
  -1  -1 -12 332.223 424.952
  -1   2 -12 480.228 542.999
   1  -2   9 7059.14 862.483
  -1   2  -9 8112.62 927.090
   2  -1  -9 6790.33 771.393
  -1  -1  -9 9398.55 948.248
  -2   1   9 8117.82 934.201
   2  -1  -9 6395.83 928.357
  -1  -1  -9 6182.00 946.343
   1   1   9 7297.82 811.609
  -1   2  -9 8593.71 1092.50
   2  -1  -6 14507.3 1091.00
  -1  -1  -6 14817.1 906.284
   1  -2   6 15307.3 1008.60
  -2   1   6 15793.9 1063.89
   1   1   6 15770.0 967.609
   2  -1  -6 15292.7 886.238
  -1   2  -6 16400.7 1070.38
  -2   1   6 15843.3 863.416
   1   1   6 14238.0 864.561
  -1  -1  -6 17699.1 1239.43
  -1   2  -6 16449.9 1145.03
  -1   2  -6 15176.5 1040.15
  -1  -1  -6 15910.6 977.068
   1  -2   3 16242.7 765.840
  -1  -1  -3 16438.7 594.496
  -1   2  -3 15219.6 749.732
   1   1   3 14285.3 766.291
  -1   2  -3 16026.5 767.890
   2  -1  -3 18741.5 633.619
  -2   1   3 16746.8 572.000
   1  -2   3 15597.7 750.908
  -1  -1  -3 16008.3 830.704
   1  -2   3 16978.5 765.131
   2  -1  -3 16684.6 808.364
  -2   1   3 15936.0 784.041
   1   1   3 14924.4 675.849
  -1   2  -3 14119.7 715.236
  -2   1   3 17131.0 811.988
  -1  -1  -3 15247.4 690.540
   2  -1  -3 14048.0 741.992
   1   1   3 16971.4 611.767
  -1  -1   3 166128. 2614.62
   2  -1   3 178901. 2136.35
  -1   2   3 162227. 2491.53
   2  -1   3 178587. 2616.43
  -1  -1   3 174530. 2256.47
   1   1  -3 167977. 2484.32
   1  -2  -3 176644. 1893.83
   1  -2  -3 177441. 2363.11
  -2   1  -3 169190. 2621.01
   1   1  -3 190294. 2406.29
  -2   1  -3 170054. 2516.99
   1  -2  -3 197156. 2812.19
   2  -1   3 176189. 2553.88
  -1   2   3 173219. 1832.94
  -1  -1   3 163942. 2439.91
  -1   2   3 179134. 2330.57
   1   1  -3 178324. 2760.01
  -2   1  -3 189638. 2220.75
  -2   1  -6 19464.8 1273.98
  -1   2   6 17576.0 913.404
  -2   1  -6 19959.0 1076.90
   1  -2  -6 18758.0 968.849
  -2   1  -6 18847.8 1144.66
  -1   2   6 18107.9 1069.57
   1  -2  -6 17799.7 1237.82
   2  -1   6 21284.9 1094.55
  -1  -1   6 19979.4 1204.71
   1   1  -6 20356.2 1267.05
   1  -2  -6 21253.9 1164.16
  -1  -1   6 19185.1 1042.09
   1   1  -6 20491.6 1130.84
  -1  -1   9 20116.9 1488.33
   2  -1   9 19806.4 1328.21
  -1   2   9 19376.0 1355.43
   1   1  -9 23237.5 1776.78
  -2   1  -9 18391.4 1370.49
   1   1  -9 21698.3 1425.90
   1  -2  -9 17347.7 1187.65
   1  -2  -9 19431.4 1653.72
  -2   1  -9 22451.3 1767.98
   1  -2 -12 259.860 480.163
   1   1 -12 761.409 520.387
  -2   1 -12 1092.90 692.491
  -2   1 -12 623.351 448.310
   0  -2 -13 2966.89 909.018
   2   0 -13 2091.75 869.252
  -2   2 -13 3032.43 889.346
   0  -2 -10 3757.98 817.113
   2  -2  10 2240.84 536.532
  -2   2 -10 3088.39 644.133
  -2   0  10 3209.93 682.108
   2   0 -10 2850.62 725.213
  -2   2 -10 4201.06 866.341
   0  -2 -10 3521.61 608.936
   0   2  10 2411.34 535.136
   2   0 -10 2667.59 548.715
   2   0  -7 3950.09 637.875
  -2   2  -7 3256.13 530.268
   0  -2  -7 3338.96 494.671
   0  -2  -7 3126.31 461.195
   0   2   7 4024.53 512.043
   2   0  -7 4094.79 533.488
   0   2   7 4349.75 546.791
  -2   0   7 3589.74 476.239
   0  -2  -7 4939.36 732.948
  -2   2  -7 3866.78 639.235
  -2   0   7 3480.73 563.358
   2  -2   7 3397.88 494.927
   2  -2   4 1179.64 231.167
   2  -2   4 518.216 188.805
   0  -2  -4 592.578 203.712
   0  -2  -4 346.626 129.558
   2   0  -4 563.278 144.256
   2   0  -4 848.576 228.124
  -2   0   4 588.780 184.914
  -2   0   4 736.997 170.977
   2   0  -4 837.654 243.331
   0  -2  -4 812.528 184.373
  -2   0   4 803.316 221.189
   0   2   4 484.287 200.649
  -2   2  -4 564.121 174.981
   0   2   4 864.685 188.659
  -2   2  -4 707.838 185.690
   2  -2   4 620.655 167.885
   0   2   4 549.191 150.297
  -2   2  -4 961.737 242.608
  -2   2  -1 132877. 1291.53
  -2   2  -1 145268. 1733.96
   2   0  -1 185307. 1714.63
   2  -2   1 157454. 1569.70
  -2   0   1 180808. 1987.53
  -2   0   1 170637. 1577.82
   0  -2  -1 163176. 1401.19
   0  -2  -1 157082. 1679.14
   2   0   2 230607. 2489.13
  -2   0  -2 208342. 2395.80
  -2   2   2 236892. 2559.08
   0   2  -2 214471. 2254.26
   0  -2   2 207812. 2497.03
   2  -2  -2 234611. 2476.98
   0   2  -2 223571. 2588.65
   2  -2  -2 231656. 2575.42
   2   0   2 218185. 2546.58
   0   2  -2 209705. 2345.69
  -2   2   2 217697. 2371.79
   2   0   2 196896. 1454.40
   0  -2   2 213496. 2209.82
  -2   0  -2 234178. 2712.19
   0  -2   2 220205. 2368.20
   2  -2  -5 13762.6 708.285
  -2   2   5 16123.7 968.440
  -2   0  -5 14888.1 917.552
  -2   0  -5 15911.3 829.745
   0   2  -5 15597.2 988.804
   0   2  -5 13851.6 887.784
  -2   0  -5 17557.9 1120.29
   0  -2   5 15902.0 987.397
  -2   2   5 14108.9 696.951
   0  -2   5 16675.7 937.084
   2  -2  -5 11907.2 907.332
   0   2  -5 12093.7 879.149
   2   0   5 14549.8 887.211
   2   0   5 14506.4 766.196
   2  -2  -5 13244.4 877.679
   0  -2   8 1004.23 355.763
  -2   0  -8 922.360 370.802
  -2   0  -8 555.805 284.560
   0   2  -8 1542.02 450.183
   2  -2  -8 963.840 368.906
   2  -2  -8 948.128 314.257
   2   0   8 1517.00 350.532
   0   2  -8 918.750 332.421
  -2   2   8 1061.08 360.260
   0   2 -11 1598.50 533.319
   0  -2  11 603.710 405.476
  -2   2  11 110.069 266.304
   0   2 -11 724.725 465.712
  -2   0 -11 723.066 463.580
  -2   0 -11 488.398 352.202
   2  -2 -11 1349.22 552.163
   2   0  11 758.320 373.378
  -1   3 -13 2261.75 815.078
  -2  -1 -13 262.507 463.556
   3  -2 -13 2365.18 826.214
  -2  -1 -10 7975.68 944.946
   3  -2 -10 8287.70 844.939
  -1   3 -10 6960.42 928.006
   1  -3  10 9001.02 1067.36
   3  -2 -10 8064.09 1136.68
  -3   2  10 7265.31 974.729
  -1   3 -10 9871.70 1258.30
  -2  -1 -10 7860.32 1141.52
   2   1  10 8320.53 872.747
  -2  -1  -7 1254.69 287.888
  -2  -1  -7 612.052 302.978
  -1   3  -7 984.965 346.402
   2   1   7 667.854 214.548
  -1   3  -7 1176.46 364.318
   3  -2  -7 1286.31 275.634
  -2  -1  -7 759.643 263.308
   1  -3   7 370.472 188.126
  -3   2   7 895.220 329.486
  -3   2   7 1115.88 242.553
   3  -2  -7 1277.10 372.379
  -1   3  -4 30152.8 1241.34
  -2  -1  -4 30935.5 1366.42
  -1   3  -4 26201.3 1119.89
  -2  -1  -4 28429.6 1135.36
   1  -3   4 29292.6 1220.97
   1  -3   4 27331.5 1156.72
  -1   3  -4 31600.6 1269.61
   3  -2  -4 30863.6 1292.46
  -3   2   4 30233.4 830.081
   2   1   4 29822.8 1157.56
   1  -3   4 28508.2 1145.94
   2   1   4 30881.4 1307.64
  -2  -1  -4 31167.0 897.239
  -3   2   4 29004.8 1243.91
   2   1   4 31516.2 896.860
  -3   2   4 31622.6 1279.13
   3  -2  -4 32284.5 1313.43
   3  -2  -4 28707.4 838.815
   1  -3   1 169190. 2006.24
   3  -2  -1 180366. 1735.83
  -2  -1  -1 182174. 2010.59
  -1   3  -1 174057. 1348.15
  -2  -1  -1 124078. 1720.56
   1  -3   1 163350. 1284.19
  -3   2   1 180378. 2135.55
  -1   3  -1 152312. 1858.44
   3  -2   2 177198. 2190.34
  -3   2  -2 177624. 1888.65
  -2  -1   2 169562. 2476.42
  -1   3   2 184734. 1550.94
  -1   3   2 179728. 2037.47
   2   1  -2 182495. 2546.49
  -3   2  -2 195283. 2556.85
   2   1  -2 177217. 2019.10
  -1   3   2 178233. 2244.72
   3  -2   2 183995. 1940.31
   1  -3  -2 182618. 2011.12
  -2  -1   2 175113. 2159.29
   2   1  -2 170685. 2149.67
   1  -3  -2 200118. 2404.67
   1  -3  -2 176025. 1492.94
   3  -2   2 184084. 2468.94
  -3   2  -2 175686. 2213.69
   2   1  -5 58267.9 1709.88
  -3   2  -5 50956.3 1870.34
  -3   2  -5 60226.1 1711.77
  -2  -1   5 58685.7 1637.16
   1  -3  -5 55454.9 1440.12
   2   1  -5 61029.5 1975.23
  -3   2  -5 63255.4 2010.71
   1  -3  -5 58406.5 1728.24
   2   1  -5 56069.6 1990.37
  -2  -1   5 58107.0 1980.20
   3  -2   5 58241.1 1646.91
  -1   3   5 56426.8 1422.42
   1  -3  -5 53790.1 1959.70
   3  -2   5 58648.4 1911.69
  -1   3   5 58103.0 1677.90
   2   1  -8 2200.17 527.200
   3  -2   8 2288.59 426.679
  -1   3   8 3333.92 537.262
   2   1  -8 2472.59 459.968
  -3   2  -8 4049.69 703.911
   1  -3  -8 2945.59 479.852
   1  -3  -8 3587.67 676.690
  -3   2  -8 3998.95 660.870
  -2  -1   8 4174.25 687.517
  -1   3  11-46.9386 283.070
  -3   2 -11-205.127 369.237
  -3   2 -11 92.6227 352.606
  -2  -1  11 354.126 358.811
   2   1 -11 45.4450 311.630
   3  -2  11 243.637 312.824
   2   1 -11 242.122 391.783
   1  -3 -11 8.01283 303.374
  -1  -2 -11 396.042 272.256
  -1  -2 -11 527.693 402.344
  -2   3 -11 186.371 346.618
  -3   1  11 1030.06 463.461
   2  -3  11 993.616 491.436
  -2   3 -11 850.835 399.808
   3  -1 -11 88.8336 312.897
   2  -3   8 3443.40 587.874
  -1  -2  -8 4871.70 778.927
  -2   3  -8 4326.34 650.580
   1   2   8 5435.22 624.971
  -2   3  -8 4345.71 714.392
   3  -1  -8 4002.01 533.126
  -1  -2  -8 5939.02 707.364
  -3   1   8 4194.76 673.905
   3  -1  -8 3671.68 686.462
  -2   3  -5 504.083 215.462
   2  -3   5 517.534 186.880
  -1  -2  -5 371.969 228.054
   1   2   5 49.9094 113.940
   3  -1  -5-15.4568 113.363
  -2   3  -5 103.124 150.925
  -3   1   5 82.0146 76.0295
   2  -3   5 492.762 232.314
  -3   1   5 299.294 180.830
  -2   3  -5 204.657 173.706
   1   2   5 96.6558 144.640
   3  -1  -5 236.924 126.450
  -1  -2  -5 219.326 144.229
  -1  -2  -5 591.933 216.253
   3  -1  -5 474.026 199.143
   3  -1  -2 60570.1 1450.28
   3  -1  -2 65632.7 1046.75
   2  -3   2 62118.5 1152.62
  -2   3  -2 65110.8 1390.53
   1   2   2 62433.4 1218.23
   3  -1  -2 60987.9 1328.30
  -3   1   2 63596.9 1344.80
  -1  -2  -2 60848.4 1441.01
   2  -3   2 60926.7 1385.96
   2  -3   2 66463.8 1399.11
  -2   3  -2 63881.2 1429.82
  -3   1   2 63041.5 1472.47
  -2   3  -2 61681.9 1184.24
  -1  -2  -2 64767.7 1246.12
   3  -1  -2 62467.1 964.338
   1   2   2 69324.5 1485.17
  -3   1  -1 83187.9 978.296
   2  -3  -1 77853.1 1080.91
   1   2  -1 76524.8 1240.60
  -1  -2   1 64614.3 1257.41
  -3   1  -1 76766.6 1276.55
  -3   1  -1 70057.5 889.351
   2  -3  -1 17381.7 612.925
   1   2  -1 76877.0 1098.18
  -2   3   1 82526.0 1331.79
  -1  -2   1 25901.3 630.691
   3  -1   1 10298.5 467.054
  -3   1  -1 89005.2 1489.25
  -3   1  -4 162439. 3057.04
   3  -1   4 157199. 2842.68
   2  -3  -4 148668. 1868.20
  -1  -2   4 149722. 2865.98
   3  -1   4 144589. 2745.20
  -3   1  -4 144641. 2741.86
  -2   3   4 145185. 2524.43
  -1  -2   4 155066. 2736.59
   1   2  -4 159317. 2987.94
   2  -3  -4 154945. 2916.29
   1   2  -4 154413. 2611.92
   2  -3  -4 155473. 2716.08
   3  -1   4 151319. 2153.28
  -2   3   4 153197. 2820.30
   1   2  -4 154034. 2749.64
  -1  -2   4 159934. 2586.09
  -3   1  -4 157620. 2244.29
  -2   3   4 154340. 1853.77
  -3   1  -7 12179.1 1022.40
  -3   1  -7 14183.2 1199.61
  -3   1  -7 12358.8 894.284
   1   2  -7 13478.2 1130.48
   2  -3  -7 14490.1 1211.94
  -2   3   7 11189.9 741.806
  -1  -2   7 11628.1 1017.32
   3  -1   7 12908.4 878.125
   1   2  -7 11931.3 961.068
   2  -3  -7 12170.9 815.148
  -2   3   7 10258.8 912.143
  -1  -2  10 290.998 307.966
  -3   1 -10 1507.72 455.880
   2  -3 -10 1900.89 606.102
  -3   1 -10 1114.48 533.921
  -2   3  10 1272.95 460.225
   3  -1  10 2115.25 467.195
   2  -3 -10 1135.48 335.260
   1   2 -10 1141.37 467.008
   1   2 -10 958.596 387.791
   2  -3 -13 1539.84 691.529
   1   2 -13 3526.46 977.314
  -3   1 -13 4693.55 1151.18
   3   0 -12 287.357 352.684
  -3   0  12 396.512 436.156
  -3   3 -12 819.486 559.587
  -3   3 -12 344.907 381.405
   0   3   9 6491.99 747.078
   3  -3   9 6817.46 815.421
  -3   0   9 7999.06 978.452
   3   0  -9 10444.6 1181.00
  -3   3  -9 7766.29 950.601
  -3   3  -9 6463.33 936.173
   3   0  -9 7494.63 801.963
   0  -3  -9 6232.41 959.500
   0  -3  -9 6194.43 732.032
   3   0  -6 70456.8 1940.85
   3  -3   6 70290.6 2074.78
   0  -3  -6 73345.9 2025.16
   0   3   6 69056.1 1849.22
   0  -3  -6 71402.7 1954.34
  -3   3  -6 79659.0 2526.84
  -3   3  -6 72537.6 2166.49
  -3   3  -6 70477.4 2337.37
   0   3   6 72413.1 1940.34
   0  -3  -6 77337.9 2614.29
  -3   0   6 69455.5 1847.46
  -3   0   6 78597.4 2516.96
   3   0  -6 65639.0 2328.03
   3   0  -3 33796.0 951.496
  -3   3  -3 32893.4 1232.96
   0  -3  -3 32149.3 903.909
   3  -3   3 32201.5 1195.35
   3  -3   3 32108.1 1072.85
   0  -3  -3 33021.6 892.798
  -3   3  -3 31344.8 1102.48
   0   3   3 29999.1 878.185
  -3   3  -3 30820.3 1033.83
   3  -3   3 32478.8 1075.07
   3   0  -3 33828.0 1276.09
   3   0  -3 37692.2 1217.98
  -3   0   3 32564.4 1256.73
   0   3   3 32623.0 883.956
  -3   0   3 35299.6 1183.24
   0   3   3 27406.3 1083.67
   0  -3  -3 34364.5 1257.46
   0  -3   0 208391. 1967.04
   3  -3   0 9152.06 390.100
  -3   3   0 257336. 2362.50
   3   0   0 205189. 1870.78
   0  -3   0 48899.6 741.544
  -3   0   0 199462. 1847.12
  -3   0   0 246395. 2269.28
   0  -3   0 251277. 2262.51
  -3   0  -3 1032.10 238.574
   0   3  -3 1227.23 229.868
   3  -3  -3 1012.51 215.427
   0  -3   3 1309.80 224.909
   3  -3  -3 998.214 221.385
  -3   0  -3 863.667 127.502
  -3   0  -3 977.568 218.572
   3   0   3 964.188 226.445
  -3   3   3 1036.02 109.728
   0   3  -3 1353.29 266.460
   0  -3   3 921.447 226.273
  -3   3   3 323.524 170.884
  -3   3   3 773.538 203.811
   3   0   3 1250.90 271.930
   0   3  -3 1283.72 256.223
   3   0   3 1054.49 128.775
   0  -3   3 733.030 176.035
   3  -3  -3 921.379 111.562
  -3   3   6 349.010 215.707
   0  -3   6 262.273 207.830
  -3   3   6 220.940 125.915
  -3   0  -6 312.108 229.871
   0   3  -6-74.7613 170.753
   3   0   6 119.368 130.280
  -3   0  -6 275.946 134.749
  -3   0  -6 211.873 237.274
   0   3  -6 400.281 249.866
   3  -3  -6-93.1388 171.050
   3  -3  -6 83.0802 110.218
   0   3  -9 7385.81 903.420
   0  -3   9 10082.7 1083.51
   3  -3  -9 7439.94 734.798
   3   0   9 7476.42 774.038
  -3   0  -9 8636.79 1126.96
  -3   0  -9 8482.49 950.345
   0   3  -9 7623.19 1021.98
   3  -3  -9 11199.0 1232.16
  -3   3   9 8707.94 970.154
   3  -3 -12 982.823 528.609
   0   3 -12-79.9008 342.048
  -3   0 -12 143.129 405.201
  -3   3  12 470.860 322.055
   0   3 -12 636.397 571.513
   0  -3  12 708.078 438.244
  -4   3  11 1250.95 545.828
   1  -4  11 654.990 362.010
   4  -3 -11 1254.65 542.080
  -1   4 -11 364.824 349.587
  -3  -1 -11 947.570 435.791
  -3  -1 -11 565.210 450.397
  -1   4 -11 78.6265 309.953
  -4   3   8 2376.07 524.259
  -1   4  -8 3125.99 596.892
  -1   4  -8 2378.32 538.683
  -3  -1  -8 1355.88 318.724
  -3  -1  -8 1539.84 498.004
  -3  -1  -8 2440.09 517.490
   4  -3  -8 1698.65 502.927
   3   1   8 2394.52 415.962
   1  -4   8 1501.21 403.104
   4  -3  -8 1965.49 358.142
  -4   3   8 1931.51 346.005
   3   1   5 115153. 2604.42
  -1   4  -5 110150. 2767.37
  -3  -1  -5 113593. 2644.05
  -1   4  -5 116215. 2756.95
  -4   3   5 116037. 2798.96
   1  -4   5 115856. 2800.46
  -3  -1  -5 109769. 2898.48
  -4   3   5 116855. 1718.64
   4  -3  -5 112793. 2816.85
   4  -3  -5 118645. 1845.73
   1  -4   5 116423. 2695.77
  -1   4  -5 120415. 2709.88
   3   1   5 115316. 1855.05
   4  -3  -5 106017. 2719.00
  -3  -1  -5 115912. 1878.69
  -1   4  -2 215987. 2904.83
   1  -4   2 238909. 3003.33
  -3  -1  -2 223326. 2772.04
  -4   3   2 231218. 2555.21
  -1   4  -2 229287. 2873.27
   1  -4   2 222893. 2768.60
  -3  -1  -2 229495. 3005.72
   4  -3  -2 218471. 2963.83
   4  -3  -2 218904. 2535.57
   1  -4   2 226433. 2198.10
  -4   3   2 222139. 2972.56
   3   1   2 223509. 2800.54
   3   1  -4 271108. 3341.73
  -4   3  -4 264890. 3963.13
  -1   4   4 248066. 3711.67
   1  -4  -4 250348. 3825.28
   4  -3   4 246811. 3733.14
  -3  -1   4 261978. 3637.30
   1  -4  -4 265556. 2700.70
   4  -3   4 253488. 3599.87
  -4   3  -4 276065. 3327.33
  -3  -1   4 261054. 3188.48
   4  -3   4 259381. 3217.56
   3   1  -4 259701. 3683.51
  -1   4   4 259655. 3161.90
   1  -4  -4 263891. 3198.88
  -1   4   4 262926. 2684.75
   3   1  -4 245518. 3927.47
  -3  -1   4 269633. 4119.14
  -4   3  -4 246419. 3641.20
   1  -4  -7 15085.3 919.991
   3   1  -7 16922.3 1077.28
  -4   3  -7 17007.5 1249.18
  -1   4   7 15822.9 906.434
   4  -3   7 15037.3 993.477
   1  -4  -7 15891.0 1308.00
  -3  -1   7 15724.6 1226.46
   3   1  -7 16930.0 1272.74
  -1   4   7 16244.2 1037.36
  -4   3  -7 18087.2 1337.01
   1  -4  -7 15862.6 1067.68
   4  -3  10 18731.6 1381.91
   1  -4 -10 17086.6 1674.46
  -1   4  10 17847.0 1332.03
  -3  -1  10 17711.3 1577.86
  -4   3 -10 15545.3 1440.00
   1  -4 -10 17567.3 1209.44
   3   1 -10 19743.0 1737.40
  -4   3 -10 19384.5 1749.86
   3   1 -10 18103.5 1372.14
  -4   3 -13 435.237 410.877
   3   1 -13 1140.31 667.793
  -3  -1  13 985.907 560.060
  -2   4 -12 2934.14 708.641
  -2  -2 -12 4087.17 1015.61
  -2   4 -12 3886.50 872.994
  -4   2  12 3608.73 797.256
   2  -4  12 3578.45 798.414
   4  -2 -12 4714.41 1043.18
  -4   2   9 17183.4 1412.63
  -2   4  -9 15515.9 1434.77
   2  -4   9 14435.5 1246.49
  -2  -2  -9 15166.1 1499.04
  -2  -2  -9 15807.4 1230.14
  -2   4  -9 13912.8 1267.38
   4  -2  -9 15168.0 1439.65
   2   2   9 13642.0 995.280
   4  -2  -9 13663.5 995.476
  -2  -2  -6 1128.46 362.179
   4  -2  -6 370.046 223.967
  -4   2   6 981.650 214.661
  -2  -2  -6 1387.21 277.431
  -4   2   6 1676.32 391.765
   2   2   6 1212.39 253.220
  -2   4  -6 1236.38 343.829
   4  -2  -6 1048.88 242.046
   2   2   6 946.231 269.538
  -2   4  -6 1115.16 322.553
   2  -4   6 480.213 226.052
  -2  -2  -6 844.732 260.035
  -2  -2  -3 23419.2 554.556
   2   2   3 24899.3 971.978
  -4   2   3 24146.1 993.968
  -2  -2  -3 22130.4 912.640
   2   2   3 24595.3 557.612
   4  -2  -3 24686.8 1105.10
   2   2   3 25864.9 1120.82
   4  -2  -3 25934.7 1032.91
  -2   4  -3 22247.9 1019.35
   2  -4   3 23649.1 1020.55
  -2   4  -3 22175.3 982.701
   4  -2  -3 25229.6 662.448
  -2   4  -3 23826.3 902.583
  -4   2   3 24074.1 1084.33
   4  -2  -3 23894.4 687.534
   2  -4   3 24178.5 894.673
   2  -4   3 24075.8 1041.24
  -2  -2  -3 27205.2 1176.95
  -4   2   0 316440. 2727.40
   4  -2   0 217887. 2218.88
  -2  -2   0 132088. 1609.70
   2   2  -3 2056.06 297.847
  -2   4   3 2578.30 319.605
   4  -2   3 2493.09 350.119
  -2   4   3 2841.73 353.679
   2  -4  -3 2748.58 356.236
   4  -2   3 2520.95 263.122
  -2  -2   3 2266.62 302.027
   2   2  -3 1870.23 336.811
   2   2  -3 2753.53 329.307
  -4   2  -3 3124.82 397.631
  -4   2  -3 2192.60 240.391
  -2   4   3 2799.37 197.477
  -4   2  -3 2662.97 353.961
   4  -2   3 2417.00 327.917
  -2  -2   3 2377.71 357.924
   2  -4  -3 2436.52 190.602
  -2  -2   3 3072.82 348.614
   2  -4  -3 2684.98 318.245
  -2   4   6 6930.66 663.014
  -4   2  -6 7174.93 791.192
   2   2  -6 6971.43 750.966
   4  -2   6 7382.08 612.200
   2  -4  -6 5768.62 728.525
   2  -4  -6 6895.66 692.968
  -2  -2   6 6103.28 735.304
  -4   2  -6 6745.86 611.314
  -4   2  -6 7002.70 761.415
   2  -4  -6 7000.61 547.819
  -2  -2   6 6559.64 643.694
   2   2  -6 6971.69 687.502
  -2   4   6 6746.71 513.931
   2  -4  -9 10393.5 857.797
  -2  -2   9 11134.7 1159.64
   2   2  -9 11691.1 1086.83
   2  -4  -9 10491.5 1222.24
  -2   4   9 11322.9 1031.75
  -4   2  -9 12284.6 1314.06
  -4   2  -9 11636.2 1164.76
   2   2  -9 10747.2 1193.59
   4  -2   9 13015.0 1040.98
   2  -4 -12 431.525 494.750
  -4   2 -12-32.7735 312.391
  -1  -3 -13 2403.33 855.185
   4  -1 -13 745.475 543.454
  -3   4 -13 1787.02 819.287
  -4   1  10 5043.25 834.265
   3  -4  10 5488.06 794.495
   1   3  10 6453.34 770.730
  -3   4 -10 5119.92 934.459
   4  -1 -10 6051.89 1017.47
   4  -1 -10 4386.86 650.196
  -1  -3 -10 6672.48 840.290
  -3   4 -10 4281.95 785.935
  -1  -3 -10 6915.84 1111.74
   3  -4   7 39211.6 1749.06
  -3   4  -7 42230.4 1984.83
   4  -1  -7 40263.4 1533.66
  -1  -3  -7 42084.9 2125.97
  -1  -3  -7 40877.1 1562.12
   1   3   7 44692.0 1559.59
  -4   1   7 40296.9 1962.07
  -4   1   7 39708.1 1466.79
   1   3   7 37465.9 1553.48
  -1  -3  -7 39399.1 1625.90
  -3   4  -7 44103.2 2026.13
   4  -1  -7 41051.3 1998.29
  -4   1   4 217152. 3333.59
  -1  -3  -4 232008. 3071.61
  -3   4  -4 226085. 3702.70
   4  -1  -4 247971. 2746.87
   3  -4   4 241304. 3689.55
  -3   4  -4 241658. 3459.19
   1   3   4 239625. 3052.37
   1   3   4 243771. 2523.26
   3  -4   4 221928. 3171.57
   4  -1  -4 242750. 2882.12
   3  -4   4 234888. 3426.12
   1   3   4 254526. 3826.51
   4  -1  -4 247844. 3672.33
  -3   4  -4 247411. 3485.32
  -1  -3  -4 219751. 3706.32
   4  -1  -4 238849. 3848.39
  -1  -3  -4 239979. 2571.99
  -4   1   4 258070. 3997.73
   4  -1  -1 16884.9 587.624
  -1  -3  -1 17516.4 655.619
   3  -4   1 17538.2 697.719
  -4   1   1 16308.5 718.778
  -3   4  -1 15560.1 667.949
  -3   4  -1 17111.4 417.393
   3  -4   1 17684.9 703.071
  -1  -3  -1 17815.1 494.621
   1   3   1 13761.5 584.591
   4  -1  -1 19797.0 665.312
  -3   4  -1 16523.3 669.134
  -1  -3  -1 16312.3 660.450
  -4   1   1 16885.5 608.299
   1   3   1 18053.5 506.535
   4  -1  -1 15420.6 695.550
  -4   1   1 17809.4 607.604
   1   3   1 16439.8 659.085
  -1  -3   2 241825. 3129.67
   1   3  -2 242589. 3110.91
  -3   4   2 249960. 2959.12
   4  -1   2 240628. 1819.94
   1   3  -2 246530. 2821.05
   4  -1   2 240153. 2910.87
   3  -4  -2 250907. 2688.76
  -1  -3   2 262891. 2883.85
   3  -4  -2 235228. 2835.59
  -4   1  -2 244515. 1828.44
  -3   4   2 246786. 2598.23
   1   3  -2 264421. 2599.58
  -4   1  -2 243449. 2970.45
  -1  -3   2 254056. 2573.95
   4  -1   2 257941. 3114.22
  -4   1  -2 246277. 3080.45
   3  -4  -5 1657.56 352.207
  -3   4   5 1927.21 220.443
   4  -1   5 2123.81 408.327
  -3   4   5 2162.29 375.980
  -4   1  -5 2130.27 295.704
   4  -1   5 2366.57 299.606
   3  -4  -5 1865.60 358.282
  -1  -3   5 1797.35 363.793
   3  -4  -5 1829.03 231.718
   1   3  -5 2019.64 373.178
  -1  -3   5 1670.02 321.301
  -4   1  -5 1595.76 342.115
  -4   1  -5 1845.23 388.162
   1   3  -5 2273.74 392.990
  -4   1  -8 44153.2 2086.26
  -4   1  -8 38165.6 1631.20
  -3   4   8 42708.5 1437.37
   4  -1   8 47720.2 1752.41
   1   3  -8 41391.6 2130.40
   1   3  -8 46570.7 2096.30
   3  -4  -8 46972.3 2352.52
   3  -4  -8 45458.7 1582.68
  -3   4   8 46480.3 2050.34
  -1  -3   8 43520.7 2143.21
  -4   1  -8 48133.6 2412.23
   3  -4 -11 2658.16 777.809
  -3   4  11 2205.69 573.725
   1   3 -11 892.915 491.020
   1   3 -11 2487.96 579.227
  -4   1 -11 2952.85 798.982
  -1  -3  11 2685.12 641.676
  -4   1 -11 2505.87 647.632
  -4   4 -11 90.3690 319.198
   0  -4 -11 398.191 379.568
  -4   4 -11 310.245 360.281
   4   0 -11 614.124 507.009
   4   0 -11 230.595 305.607
  -4   0  11 362.982 409.000
   4  -4  11 405.831 348.141
   0  -4  -8 1761.99 389.637
   4   0  -8 2699.75 572.080
  -4   4  -8 2390.51 525.818
   4   0  -8 1640.01 387.657
   4  -4   8 1400.21 377.196
  -4   4  -8 1709.02 424.482
   0   4   8 1851.83 390.133
  -4   0   8 2632.02 589.836
   0  -4  -8 1420.92 465.322
  -4   0   5 64469.5 1659.57
  -4   0   5 59943.7 2125.52
   0  -4  -5 59688.1 2158.43
  -4   4  -5 74368.8 2210.58
   4   0  -5 66697.7 1737.39
   4  -4   5 65566.5 1897.60
  -4   4  -5 68440.2 2241.15
   4   0  -5 68646.4 2150.03
   0  -4  -5 68139.7 1678.48
  -4   4  -5 67321.5 1919.58
   0  -4  -5 63172.8 1624.10
   0   4   5 66463.0 1636.90
   0   4   5 65713.4 1649.80
   0  -4  -2 4023.13 318.764
   0   4   2 4238.95 323.428
  -4   4  -2 3778.98 319.623
   0   4   2 4214.72 300.683
   4   0  -2 3625.83 403.572
   0   4   2 3748.45 265.452
  -4   0   2 4119.46 364.192
   4  -4   2 3712.44 351.447
  -4   0   2 4035.96 430.983
   4  -4   2 3434.36 373.078
   4   0  -2 4079.10 355.937
   4  -4   2 3611.32 301.180
  -4   4  -2 4495.16 387.948
  -4   4  -2 3638.60 397.595
   0   4   2 3335.88 354.319
   0  -4  -2 3976.85 384.287
   4   0  -2 4374.71 354.721
  -4   0   2 4234.99 357.682
   4   0   4 9033.67 430.607
  -4   0  -4 10055.9 805.353
  -4   4   4 10077.1 357.319
   4  -4  -4 9682.63 374.678
   4  -4  -4 9225.59 741.974
  -4   4   4 9578.34 742.686
   0   4  -4 10020.6 746.804
  -4   0  -4 8064.99 695.172
  -4   4   4 10905.6 763.827
   4   0   4 7957.69 687.227
   4   0   4 10983.3 776.591
   0   4  -4 9617.27 773.132
  -4   0  -4 9770.03 455.220
   0  -4   4 9705.06 678.436
   4  -4  -4 10135.0 760.651
   0   4  -4 10850.1 730.988
   0  -4   4 9917.98 708.979
   0  -4   4 10614.0 819.356
   4  -4  -7 137.300 149.656
  -4   0  -7 387.773 199.297
  -4   0  -7 11.8714 217.031
  -4   0  -7 21.6242 149.189
  -4   4   7 264.445 218.826
   4  -4  -7-5.51695 159.691
   0   4  -7 682.349 262.367
   0   4  -7 332.286 205.811
   0  -4   7 172.448 199.226
   4   0   7 139.852 156.953
  -4   4   7 260.227 130.858
  -4   4  10 3861.84 702.726
   0  -4  10 3705.95 708.804
   4  -4 -10 3735.27 537.732
   0   4 -10 4984.84 906.048
  -4   0 -10 5151.67 826.998
   0   4 -10 4313.97 741.957
   4  -4 -10 2386.03 685.954
  -4   0 -10 2277.26 675.380
   4   0  10 3413.07 563.601
  -4   0 -13 6773.12 1349.29
   0   4 -13 8787.72 1455.80
   4  -4 -13 6883.28 1340.49
  -1   5 -12 1390.98 646.624
  -1   5 -12 1674.35 602.921
   1  -5  12 2275.74 667.851
   5  -4 -12 1808.83 707.990
  -4  -1 -12 2085.15 906.748
   4   1   9 6294.54 633.831
  -1   5  -9 6673.20 915.069
  -4  -1  -9 6122.69 809.770
  -5   4   9 7440.24 953.007
   5  -4  -9 5726.40 943.708
   1  -5   9 8258.17 1009.74
  -1   5  -9 7665.59 1006.66
   5  -4  -9 6600.79 626.148
  -4  -1  -9 6841.26 1016.04
   1  -5   6 41672.5 1858.56
  -1   5  -6 35929.0 1706.92
   5  -4  -6 36869.2 1769.57
   4   1   6 39351.1 1116.04
  -4  -1  -6 39930.0 1164.92
  -5   4   6 38143.7 1769.44
  -4  -1  -6 36406.2 1862.28
  -1   5  -6 41338.4 1756.64
   5  -4  -6 40204.5 1105.92
  -4  -1  -6 37830.7 1699.76
   4   1   3 18725.9 994.913
   4   1   3 20772.1 1014.16
  -1   5  -3 19110.4 827.053
  -5   4   3 17117.7 966.204
   1  -5   3 19356.4 956.815
   5  -4  -3 19274.2 1038.23
  -1   5  -3 18539.2 996.101
  -4  -1  -3 18856.0 963.288
   5  -4  -3 19006.2 914.834
   1  -5   3 20972.9 1078.48
  -5   4   3 20205.0 916.771
   1  -5   3 19052.0 789.443
  -4  -1  -3 20843.0 1094.60
  -1   5  -3 22348.3 1077.74
  -4  -1   0 262138. 2671.84
   5  -4   0 268809. 2622.30
  -4  -1   0 243791. 2493.20
   4   1   0 278828. 2653.44
  -1   5   0 259233. 2776.12
  -5   4   0 283753. 3092.85
  -4  -1   0 248932. 2869.76
  -5   4   0 244963. 1913.19
  -1   5   0 257731. 1983.51
   4   1   0 261985. 2944.29
  -1   5   0 251441. 1797.29
   4   1   0 249695. 2544.80
  -1   5   0 252638. 2714.88
   1  -5   0 255349. 2742.05
   5  -4   0 288854. 3052.18
  -5   4   0 247882. 2514.23
   4   1  -3 257878. 3263.24
   4   1  -3 292159. 3520.53
  -5   4  -3 265729. 3158.04
   1  -5  -3 274422. 3651.07
  -1   5   3 281079. 3562.87
   1  -5  -3 244555. 2491.90
  -5   4  -3 277736. 3344.60
   1  -5  -3 259679. 2866.51
  -4  -1   3 264208. 3971.59
   5  -4   3 277263. 3840.54
   4   1  -3 261590. 3905.60
  -1   5   3 275278. 3029.76
   4   1  -3 260325. 3043.65
  -4  -1   3 266865. 3404.15
  -5   4  -3 283453. 3945.76
   5  -4   3 253414. 3044.17
  -1   5   3 270457. 2562.09
   5  -4   3 249934. 3135.55
  -1   5   6 1746.68 276.276
   4   1  -6 1601.08 383.617
  -5   4  -6 1786.25 400.012
  -5   4  -6 1793.53 361.181
   4   1  -6 1692.24 345.355
  -4  -1   6 1771.26 335.582
  -1   5   6 1951.93 337.197
   1  -5  -6 1764.00 412.505
   1  -5  -6 1040.32 252.367
  -4  -1   6 1446.86 415.599
   5  -4   6 1423.87 306.102
  -5   4  -6 1416.11 383.495
   1  -5  -6 1821.15 341.817
   1  -5  -9 271.559 324.512
  -5   4  -9 1031.93 427.495
   1  -5  -9 589.868 271.402
   5  -4   9 228.555 245.935
   4   1  -9 824.330 439.354
  -1   5   9 552.475 322.265
  -5   4  -9 440.366 392.822
   4   1  -9 355.959 286.797
  -4  -1   9 106.168 221.501
   1  -5 -12 3505.42 968.775
   4   1 -12 4761.14 989.080
  -5   4 -12 4398.32 902.449
  -4  -1  12 4596.98 964.444
  -5   4 -12 3865.47 920.868
  -3  -2 -13 1712.27 792.328
  -2   5 -13 2461.21 815.229
  -2   5 -10 2595.51 636.193
  -3  -2 -10 1823.62 511.309
   5  -3 -10 2810.83 737.543
  -2   5 -10 2019.17 658.208
  -3  -2 -10 3081.12 741.497
   2  -5  10 2394.38 567.902
   3   2  10 2200.47 426.114
  -5   3  10 3051.03 644.856
   5  -3 -10 2139.21 469.939
   5  -3  -7 2876.31 386.654
  -5   3   7 3354.07 603.657
  -3  -2  -7 2741.37 575.586
  -2   5  -7 3345.25 608.242
   5  -3  -7 2959.21 598.757
  -3  -2  -7 3000.95 519.887
   2  -5   7 3168.29 561.283
   3   2   7 2320.63 328.583
  -3  -2  -7 2823.25 384.319
  -2   5  -7 3012.86 541.564
  -3  -2  -4 4331.80 554.185
   3   2   4 5466.16 531.079
  -2   5  -4 5769.23 525.537
   5  -3  -4 6609.45 385.264
   2  -5   4 6273.57 535.311
   5  -3  -4 7192.04 692.751
   3   2   4 5033.57 279.309
   2  -5   4 4791.06 535.182
  -2   5  -4 6117.40 609.924
   5  -3  -4 5626.17 564.664
   2  -5   4 5541.55 581.352
  -3  -2  -4 4917.78 282.691
  -5   3   4 5422.66 609.764
  -3  -2  -4 5753.80 556.489
  -5   3   4 5766.53 568.797
  -2   5  -4 5766.10 607.849
   5  -3  -4 5434.65 337.749
  -5   3   1 124963. 1559.21
  -3  -2  -1 121204. 1266.91
  -5   3   1 118556. 2139.81
   2  -5   1 99525.5 936.714
   5  -3  -1 117249. 1625.76
  -2   5  -1 117857. 1060.24
   2  -5   1 136773. 2042.78
  -2   5  -1 120095. 1957.09
   3   2   1 117610. 2013.31
  -5   3   1 117495. 1595.17
   5  -3  -1 130756. 2183.90
   5  -3  -1 124427. 1541.35
  -2   5  -1 85837.0 1737.91
  -3  -2  -1 121198. 1997.24
   3   2   1 132061. 1969.29
   3   2   1 126254. 1286.62
   2  -5   1 125932. 2102.69
   3   2   1 134158. 2109.19
  -5   3  -2 79393.7 1430.85
  -2   5   2 82588.7 1592.56
   3   2  -2 74316.3 1526.56
  -2   5   2 80058.0 1095.11
  -5   3  -2 79302.1 1865.25
   2  -5  -2 78251.1 1576.99
   5  -3   2 73915.6 1536.99
   2  -5  -2 74463.4 1552.71
   5  -3   2 75286.1 1403.65
  -3  -2   2 64437.4 1701.76
   3   2  -2 76684.2 1598.36
   5  -3   2 73032.5 1772.02
  -3  -2   2 69585.6 1483.10
  -5   3  -2 80428.3 1645.36
   3   2  -2 74831.1 1678.45
   3   2  -2 76960.2 1854.04
   2  -5  -2 80985.0 1105.92
  -2   5   2 77893.1 1581.50
   5  -3   5 193676. 2936.18
  -5   3  -5 199789. 3022.77
  -5   3  -5 193144. 3691.07
   3   2  -5 187045. 3530.01
   3   2  -5 189448. 3247.17
   2  -5  -5 195944. 3811.04
  -3  -2   5 204270. 3950.98
  -5   3  -5 166657. 3523.67
  -2   5   5 194924. 2336.61
  -3  -2   5 182253. 3082.04
  -2   5   5 188732. 3119.20
   2  -5  -5 190086. 3176.88
   2  -5  -5 185540. 2346.24
   5  -3   8 12001.5 948.925
   2  -5  -8 11249.9 1192.24
   3   2  -8 12662.1 1206.81
  -2   5   8 11287.6 965.208
  -3  -2   8 11162.8 1123.23
   3   2  -8 12222.3 1029.37
  -2   5   8 10984.2 754.945
  -5   3  -8 11142.5 1107.71
   2  -5  -8 13046.6 864.160
  -5   3  -8 12369.2 1211.68
  -2   5  11 3551.42 662.177
  -5   3 -11 3540.89 793.713
   2  -5 -11 2744.40 737.325
  -3  -2  11 3843.67 817.718
   3   2 -11 3294.17 673.278
   3   2 -11 5052.80 965.707
  -3   5 -11 17021.2 1607.83
  -5   2  11 17587.4 1644.75
  -3   5 -11 19413.2 1842.70
   3  -5  11 20479.8 1668.06
   5  -2 -11 17448.7 1793.20
  -2  -3 -11 15690.0 1331.82
  -2  -3 -11 21059.1 2002.81
  -2  -3  -8 69003.1 2995.41
   3  -5   8 76751.7 2700.11
  -2  -3  -8 77441.8 2192.99
  -3   5  -8 76761.8 2887.79
  -5   2   8 78168.8 2932.65
   5  -2  -8 81499.6 3087.25
  -3   5  -8 79410.0 2934.43
  -2  -3  -8 79667.5 2570.82
   5  -2  -8 73766.5 2201.35
   5  -2  -8 79205.0 2196.80
   2   3   8 77504.5 2082.66
  -2  -3  -5 3060.34 519.773
  -3   5  -5 2867.12 427.098
   5  -2  -5 2571.41 320.402
  -3   5  -5 2455.56 429.340
   5  -2  -5 2509.40 305.326
   2   3   5 2378.79 371.606
  -2  -3  -5 2151.77 355.639
  -5   2   5 1896.33 392.912
   3  -5   5 2710.52 430.681
   5  -2  -5 2010.07 379.847
  -2  -3  -5 2498.01 282.973
   2   3   5 2719.10 278.925
  -3   5  -5 2350.38 406.904
   5  -2  -2 27421.7 1129.91
  -2  -3  -2 24249.6 1019.11
   2   3   2 24710.5 989.039
  -3   5  -2 23591.8 1001.45
  -3   5  -2 24802.5 724.972
  -5   2   2 22630.6 1009.77
  -5   2   2 26164.0 743.849
   3  -5   2 23859.0 680.119
  -2  -3  -2 24528.4 910.868
   5  -2  -2 24029.6 890.399
  -5   2   2 24803.7 906.102
   3  -5   2 22886.9 971.144
   5  -2  -2 25827.3 750.118
  -3   5  -2 22046.0 934.579
   2   3   2 23746.0 901.125
   3  -5   2 21541.3 934.606
   2   3  -1 96477.9 1828.38
   3  -5  -1 95904.6 1280.21
  -2  -3   1 92271.6 1467.41
   5  -2   1 101894. 1899.87
  -2  -3   1 103562. 1880.23
  -5   2  -1 92921.4 1455.53
   2   3  -1 113379. 1982.08
  -3   5   1 99880.3 1730.50
  -2  -3   1 97338.9 1830.30
  -3   5   1 100128. 1197.92
  -3   5   1 101624. 1802.22
  -5   2  -1 100204. 1913.02
   2   3  -1 94423.7 1449.90
   5  -2   1 95139.1 1466.98
   5  -2   1 93467.2 1672.30
   3  -5  -1 98626.7 1162.10
  -3   5   1 92552.2 1224.89
   5  -2   1 107107. 1627.00
   5  -2   4 6258.64 599.789
  -3   5   4 4457.34 507.945
   3  -5  -4 4592.39 524.695
   3  -5  -4 5095.27 286.910
   2   3  -4 5769.21 643.137
   2   3  -4 6205.91 577.899
   3  -5  -4 6018.62 564.383
   5  -2   4 5262.77 401.988
   5  -2   4 4710.68 541.541
  -2  -3   4 6519.42 653.160
  -3   5   4 4811.63 272.899
  -5   2  -4 4923.23 562.670
  -5   2  -4 5508.12 411.628
   2   3  -4 4652.73 495.613
  -3   5   4 5416.88 521.015
  -2  -3   4 5688.46 529.004
  -2  -3   4 6365.08 570.704
  -5   2  -4 5046.51 556.014
  -5   2  -7 1458.80 414.113
   2   3  -7 1751.63 417.143
  -5   2  -7 563.716 277.419
   2   3  -7 1030.91 289.464
  -3   5   7 1372.69 372.025
  -2  -3   7 1120.42 380.516
   3  -5  -7 1510.09 443.110
   5  -2   7 976.804 247.729
   3  -5  -7 1272.46 250.602
  -3   5   7 1632.82 267.132
  -5   2  -7 1307.44 320.400
  -2  -3  10 410.039 288.187
   2   3 -10 675.416 401.896
   3  -5 -10 269.227 512.536
   2   3 -10-42.9368 250.367
  -5   2 -10 324.296 355.075
   5  -2  10 394.726 282.433
  -5   2 -10 476.943 474.846
  -3   5  10 152.939 218.860
   2   3 -13-383.631 475.243
   3  -5 -13-331.151 485.332
  -2  -3  13 938.846 603.768
  -5   2 -13-539.562 555.742
  -1  -4 -12 2521.41 811.461
  -5   1  12 3307.20 817.103
  -4   5 -12 4441.12 915.542
   5  -1 -12 1751.28 733.504
   1   4   9 19563.7 1164.26
  -4   5  -9 21965.1 1656.95
   4  -5   9 22831.8 1546.92
  -5   1   9 20887.5 1626.05
  -1  -4  -9 21351.3 1343.31
  -4   5  -9 24492.5 1789.94
   5  -1  -9 21145.7 1695.68
   5  -1  -9 21218.3 1287.90
   5  -1  -6 49234.9 1562.96
  -1  -4  -6 51400.3 2203.67
  -5   1   6 52828.7 2184.92
  -1  -4  -6 48760.4 1460.73
   5  -1  -6 50981.1 1640.07
  -4   5  -6 51313.1 2130.27
  -4   5  -6 53871.6 2043.69
   1   4   6 51531.6 1700.58
   5  -1  -6 47089.9 1983.17
   1   4   6 49461.6 1452.39
   4  -5   6 55319.8 1973.46
  -1  -4  -6 47760.0 1643.94
  -4   5  -3 249431. 2980.53
  -4   5  -3 276942. 3552.10
  -4   5  -3 271367. 3830.79
   4  -5   3 264099. 3700.44
   4  -5   3 244995. 3308.97
  -1  -4  -3 260823. 2248.79
   1   4   3 246252. 3542.68
   1   4   3 265885. 3063.00
  -1  -4  -3 263342. 3712.59
   5  -1  -3 260330. 2664.58
   4  -5   3 259844. 2961.87
   5  -1  -3 279663. 3981.54
   5  -1  -3 272566. 3495.38
  -5   1   3 283653. 4000.85
   1   4   3 267331. 2299.51
   5  -1  -3 271767. 2919.89
  -5   1   3 243913. 3281.56
  -1  -4  -3 264951. 3055.74
  -5   1   0 184871. 2396.58
  -4   5   0 196072. 2161.88
  -1  -4   0 181807. 2410.95
   5  -1   0 195246. 2356.39
  -5   1   0 203403. 2236.83
   4  -5   0 191197. 2112.76
   1   4   0 189289. 2451.00
   5  -1   0 199993. 2266.02
   5  -1   0 203428. 2517.19
  -5   1   0 194848. 2321.34
   1   4   0 183967. 1881.91
   1   4   0 189319. 2261.81
  -1  -4   0 190061. 1995.85
  -1  -4   0 208661. 2383.82
   4  -5   0 187878. 2447.63
  -4   5   0 217208. 2624.89
   5  -1   3 1508.74 306.409
  -5   1  -3 1273.81 269.110
   5  -1   3 1324.31 152.633
   1   4  -3 1201.34 238.152
  -1  -4   3 1065.87 266.244
  -5   1  -3 1245.11 301.318
   5  -1   3 1155.25 270.036
  -4   5   3 1420.11 270.285
  -1  -4   3 1714.90 294.431
   4  -5  -3 966.030 235.783
  -1  -4   3 1293.11 229.373
   1   4  -3 849.132 203.825
   4  -5  -3 1257.80 264.390
  -5   1  -3 1282.90 148.444
   1   4  -3 1202.21 252.623
  -4   5   3 1482.13 263.587
  -5   1  -6 27414.3 1504.11
   1   4  -6 27179.1 1447.54
  -4   5   6 28158.1 828.975
   4  -5  -6 29015.6 908.278
   5  -1   6 28470.0 1060.82
   4  -5  -6 27321.7 1539.86
  -1  -4   6 30056.3 1617.76
  -5   1  -6 28145.8 1081.50
  -5   1  -6 29371.9 1643.39
  -4   5   6 29945.2 1492.44
   1   4  -6 30815.1 1537.08
  -1  -4   9 14241.8 1338.92
   1   4  -9 15866.4 1342.69
   4  -5  -9 13312.6 1352.33
  -5   1  -9 14897.6 1353.25
  -5   1  -9 12900.1 1360.01
  -4   5   9 12866.3 1189.19
   5  -1   9 13655.1 978.168
   1   4  -9 12441.9 1267.97
   4  -5  -9 12917.8 839.500
   1   4 -12 581.274 466.278
  -5   1 -12-70.7942 346.454
   1   4 -12-4.24402 476.518
   4  -5 -12 1011.99 720.936
  -1  -4  12 214.144 362.214
   5   0 -10 34136.3 1781.73
   5   0 -10 35811.3 2329.87
  -5   5 -10 31554.7 2202.31
   5  -5  10 32070.8 1881.97
   0  -5 -10 28777.9 1580.92
  -5   0  10 36074.7 2290.26
   0  -5 -10 31810.1 2329.61
   0   5  10 29996.6 1586.25
  -5   5 -10 33335.0 2185.17
   0  -5  -7 769.557 224.211
   0  -5  -7 553.501 221.097
   5   0  -7 229.072 143.664
   0  -5  -7 677.897 334.703
  -5   5  -7 1120.24 373.044
   0   5   7 905.584 257.637
  -5   5  -7 1110.62 424.440
   5  -5   7 256.358 199.661
  -5   0   7 896.414 344.604
   0   5   7 800.840 244.188
   5   0  -7 529.569 238.568
   5   0  -7 695.494 293.709
   5   0  -4 92823.7 2299.53
  -5   5  -4 93512.4 2180.28
   5  -5   4 97669.5 2155.01
   0  -5  -4 102467. 2573.01
   5  -5   4 93275.6 2161.71
   0   5   4 94649.3 1870.27
   0  -5  -4 87182.0 1778.22
   0   5   4 89121.7 1684.03
   5  -5   4 83512.5 2339.91
   5   0  -4 86067.0 1819.29
  -5   0   4 83478.4 2427.60
  -5   5  -4 89559.8 2472.50
   5   0  -4 89741.3 1994.07
  -5   5  -4 89098.9 2152.62
   0  -5  -4 89815.5 1709.47
   5  -5   1 2098.82 183.124
   5   0  -1 2546.32 302.148
   5  -5   1 2654.85 314.077
   5   0  -1 2182.55 304.209
   0  -5  -1 1716.18 240.397
  -5   5  -1 2275.50 289.731
   0   5   1 2074.37 234.415
   0  -5  -1 1999.21 228.545
  -5   0   1 1889.09 257.922
   0  -5  -1 2066.80 256.809
   5  -5   1 2681.94 320.220
  -5   0   1 1897.12 280.928
   0   5   1 2353.49 255.634
  -5   5  -1 1912.18 272.496
   5   0  -1 1360.39 215.038
   5  -5   1 2279.84 177.517
   0   5   1 1961.83 244.299
  -5   0   1 1910.51 250.557
   0  -5   2 189344. 3010.07
  -5   5   2 191723. 3045.45
   0   5  -2 185668. 2970.53
  -5   5   2 192109. 2357.59
   0   5  -2 195432. 2829.47
  -5   0  -2 186270. 1504.60
   5   0   2 188159. 2962.74
   5  -5  -2 202053. 3071.48
  -5   0  -2 194998. 3003.30
   0   5  -2 187971. 2182.07
   0  -5   2 193558. 2188.01
   5   0   2 191835. 3016.55
   0  -5   2 208098. 2923.61
  -5   0  -2 202450. 3042.90
   5  -5  -2 213332. 2564.61
   5   0   5 31803.1 857.825
  -5   5   5 27229.3 1403.29
   0   5  -5 22790.2 1269.51
  -5   0  -5 29279.1 1536.56
  -5   0  -5 29365.3 855.065
   5  -5  -5 26929.5 657.178
   0  -5   5 29535.8 1515.97
  -5   0  -5 29371.2 1463.50
   0   5  -5 25774.5 1236.06
   5  -5  -5 28893.7 1447.03
   5  -5  -5 27558.8 658.632
   5  -5  -8 92909.3 2011.63
   5  -5  -8 87812.4 3245.34
  -5   0  -8 98979.6 3206.21
  -5   0  -8 87999.0 2186.81
   0   5  -8 92952.0 3149.49
   0   5  -8 94996.6 3121.36
  -5   5   8 90635.1 3031.16
   0  -5   8 87783.0 3138.70
   5   0   8 96358.5 2227.74
  -5   0  -8 102376. 3578.71
  -5   5   8 89815.6 1814.85
   0   5 -11 1356.84 514.462
   5  -5 -11 1702.45 602.132
  -5   0 -11 1921.65 571.800
   0   5 -11 1895.64 572.563
  -5   5  11 2646.92 677.801
   0  -5  11 2533.87 693.700
  -5   0 -11 2621.54 748.914
  -5  -1 -10 21230.4 1902.67
  -5  -1 -10 19553.4 1586.34
  -1   6 -10 22588.4 1810.02
  -6   5  10 23814.7 1797.58
   6  -5 -10 21858.0 1855.09
  -1   6 -10 18719.8 1628.88
   5   1   7 353.136 155.846
  -5  -1  -7 520.299 193.602
   6  -5  -7 485.265 289.948
  -5  -1  -7 382.058 310.554
  -1   6  -7 487.446 306.696
  -5  -1  -7 1088.71 427.913
  -1   6  -7 216.205 180.560
  -6   5   7 34.3908 166.686
   6  -5  -7 402.067 140.755
   1  -6   7 121.446 230.402
   6  -5  -7 514.605 162.637
   1  -6   4 7943.74 746.841
  -6   5   4 7947.92 730.361
   1  -6   4 8127.70 599.200
  -5  -1  -4 7380.87 750.236
   6  -5  -4 7935.77 689.535
  -5  -1  -4 8275.56 732.842
   6  -5  -4 8820.72 797.817
  -1   6  -4 8519.28 638.629
  -1   6  -4 7911.73 728.701
   5   1   4 7676.24 704.905
   1  -6   1 35414.6 746.013
   1  -6   1 31741.5 1093.85
  -5  -1  -1 32953.5 1199.44
   6  -5  -1 34410.5 882.956
  -5  -1  -1 32915.8 818.171
  -6   5   1 33820.0 859.996
  -6   5   1 36064.8 916.787
  -1   6  -1 35526.0 1233.99
   5   1   1 32807.8 1199.24
   1  -6   1 34099.9 1214.06
  -1   6  -1 34808.7 730.254
   6  -5  -1 34580.5 867.380
   5   1   1 34656.3 837.857
  -1   6  -1 36814.9 1186.72
  -5  -1  -1 36081.9 1164.89
  -6   5   1 31628.7 1215.19
   6  -5  -1 32810.6 1228.12
   5   1  -2 159061. 2883.86
  -1   6   2 141104. 2128.68
   5   1  -2 149139. 2489.02
   5   1  -2 135012. 2305.05
   6  -5   2 135110. 2608.68
  -6   5  -2 135854. 2053.06
   6  -5   2 142801. 2065.33
  -1   6   2 150424. 2079.55
  -6   5  -2 147295. 2404.58
   6  -5   2 133982. 2261.61
  -5  -1   2 142208. 2415.36
  -6   5  -2 150621. 2771.67
  -1   6   2 152419. 2395.28
  -5  -1   2 158229. 2447.45
  -1   6   2 147463. 2122.83
   1  -6  -2 138174. 1975.87
  -5  -1   2 139260. 2699.57
   1  -6  -2 138410. 2299.47
   6  -5   5 249.153 144.101
   1  -6  -5 21.7943 150.573
  -6   5  -5 9.79935 148.320
   5   1  -5 163.899 158.272
  -1   6   5-8.48246 92.8490
  -5  -1   5-122.354 225.405
   5   1  -5-188.488 200.962
   1  -6  -5 85.4497 193.933
  -6   5  -5-21.5273 185.285
  -6   5  -5 40.8303 179.974
   1  -6  -5-100.714 92.4667
  -1   6   5 0.80670 91.9861
   5   1  -5-45.2148 99.7833
  -5  -1   8 1227.09 439.315
  -1   6   8 1752.03 346.573
   5   1  -8 2262.10 456.982
   1  -6  -8 2005.31 559.768
  -6   5  -8 2172.58 580.671
  -1   6   8 2128.00 402.893
   6  -5   8 1382.63 342.272
  -6   5  -8 2052.32 509.070
   1  -6  -8 1664.70 352.120
   5   1  -8 2042.09 540.958
   1  -6 -11-297.870 333.559
  -6   5 -11 353.208 535.028
   5   1 -11 629.562 415.935
   5   1 -11 196.971 263.428
  -5  -1  11-647.999 504.050
  -6   5 -11-24.7239 338.274
   2  -6  11 5020.82 895.252
   6  -4 -11 4284.19 954.646
  -4  -2 -11 5245.71 842.570
  -4  -2 -11 7348.73 1213.05
  -2   6 -11 5184.94 919.875
  -2   6 -11 4560.69 910.947
  -6   4  11 4554.73 853.463
  -4  -2  -8 29.8496 281.762
  -4  -2  -8 93.9897 139.632
  -6   4   8 36.4096 213.097
   6  -4  -8-1.31627 264.176
  -2   6  -8 343.432 262.537
   6  -4  -8 179.198 183.665
   6  -4  -8 238.097 128.120
   4   2   8 299.548 169.481
   2  -6   8 679.201 302.005
  -2   6  -8 281.430 220.963
  -4  -2  -8 275.411 235.312
   6  -4  -5 392.026 117.091
  -2   6  -5 594.138 339.091
  -4  -2  -5 518.207 271.232
   4   2   5 464.498 202.945
  -4  -2  -5 488.514 263.390
   6  -4  -5 406.914 237.143
  -6   4   5 853.284 289.692
   6  -4  -5 441.210 121.802
  -4  -2  -5 163.034 72.4023
   4   2   5 353.594 89.2754
   2  -6   5 465.727 228.133
  -2   6  -5 313.436 165.784
  -6   4   2 80631.5 1171.75
   2  -6   2 82101.0 2009.31
   4   2   2 82775.5 1922.91
   6  -4  -2 69182.4 1891.86
   6  -4  -2 75626.9 1597.07
   6  -4  -2 78327.6 1181.77
   2  -6   2 73288.8 1786.24
   4   2   2 74785.6 1893.22
  -6   4   2 75407.8 1577.17
  -2   6  -2 79239.8 1971.70
  -6   4   2 69642.7 1926.65
  -4  -2  -2 74520.9 1932.09
   2  -6   2 77240.1 1227.25
  -2   6  -2 60971.7 1685.56
  -4  -2  -2 74694.8 1835.58
  -2   6  -2 74268.4 1250.61
   6  -4   1 353143. 2873.82
  -2   6   1 352225. 3371.47
  -2   6   1 379367. 3159.98
  -4  -2   1 317530. 3583.84
   2  -6  -1 376726. 3477.56
   4   2  -1 390099. 3906.44
   4   2  -1 304788. 3057.16
  -4  -2   1 348096. 3692.34
   6  -4   1 343136. 3663.33
  -6   4  -1 387685. 3929.05
  -2   6   1 347540. 2792.05
   2  -6  -1 360166. 2870.39
  -4  -2   1 388471. 3450.59
  -6   4  -1 339903. 3283.42
  -6   4  -1 351774. 3458.90
   6  -4   1 336570. 3050.31
   4   2  -1 359644. 3780.74
   4   2  -4 61676.7 1843.67
   6  -4   4 57620.5 1527.25
  -6   4  -4 52657.9 1921.85
   2  -6  -4 59751.8 1219.87
  -2   6   4 54096.3 1768.23
  -2   6   4 54849.1 1602.85
   6  -4   4 60251.9 1793.28
   4   2  -4 53216.6 1592.04
   2  -6  -4 55433.7 1861.01
   4   2  -4 56902.5 1793.01
  -2   6   4 56951.1 1161.41
   2  -6  -4 57810.8 1632.92
  -4  -2   4 54552.4 1990.93
  -6   4  -4 61684.6 1880.68
  -6   4  -4 56007.8 1544.82
  -6   4  -7 125.056 325.274
  -6   4  -7 228.176 255.643
  -2   6   7-34.5830 113.951
   2  -6  -7-82.0794 138.551
  -4  -2   7 252.273 220.208
  -2   6   7 9.85630 164.872
   2  -6  -7 384.063 296.188
   4   2  -7 216.219 218.619
  -6   4  -7-163.858 223.095
   6  -4   7 32.7852 136.538
   4   2  -7 378.493 258.199
  -6   4 -10 117.408 295.415
   4   2 -10 392.641 330.479
  -6   4 -10 414.585 419.584
   6  -4  10 162.190 238.523
  -2   6  10-19.2693 215.722
   4   2 -10-56.4140 236.584
  -4  -2  10-45.0895 378.728
   2  -6 -10-242.003 364.309
  -3  -3 -12 6902.20 1293.50
  -3   6 -12 6086.91 1072.41
  -3   6 -12 6628.71 1132.11
   6  -3 -12 5737.85 1130.83
   3  -6  12 4696.77 891.733
   3  -6   9 9911.48 1080.81
  -3  -3  -9 11049.2 1047.01
  -6   3   9 12768.8 1293.32
   6  -3  -9 9854.45 785.184
  -3   6  -9 9991.79 1141.93
   3   3   9 10870.4 795.899
  -3   6  -9 11026.7 1203.20
   6  -3  -9 8948.07 1108.38
  -3  -3  -9 10692.7 1295.22
  -3  -3  -6 1308.76 313.830
   6  -3  -6 1255.61 230.637
  -3   6  -6 1561.67 380.488
  -6   3   6 1781.28 451.958
  -3   6  -6 1297.03 340.629
   6  -3  -6 1447.41 235.865
   3  -6   6 1319.02 350.894
  -3  -3  -6 1207.63 384.363
  -3  -3  -6 1408.68 224.132
   3   3   6 1376.42 212.904
   6  -3  -6 1438.67 396.381
  -3  -3  -3 23032.8 1039.85
   3  -6   3 23495.9 1124.70
  -3   6  -3 20102.7 1077.13
   6  -3  -3 25186.5 1244.38
  -6   3   3 23930.1 738.788
  -3   6  -3 24225.1 892.344
   3  -6   3 23531.1 846.222
  -3   6  -3 25717.1 1175.45
   3   3   3 26887.2 1126.96
   6  -3  -3 24829.1 1068.59
  -3  -3  -3 25368.9 1222.03
  -6   3   3 23511.0 1017.64
  -6   3   3 24546.8 1209.97
   3   3   3 28701.0 1265.86
   3  -6   3 23956.3 1151.87
   6  -3  -3 25153.8 755.981
  -3   6   0 297655. 3263.19
   3   3   0 289508. 3347.43
  -3  -3   0 330028. 3050.88
  -6   3   0 275566. 2545.44
   3   3   0 268875. 2711.39
  -3  -3   0 303865. 3412.56
   3  -6   0 330023. 3482.59
  -6   3   0 299719. 3136.99
   3   3   0 305574. 2970.67
   6  -3   0 325774. 3268.34
   6  -3   0 317090. 3317.45
  -3  -3   0 323607. 3067.01
  -3   6   0 305099. 2893.44
  -6   3   0 295122. 3265.83
   3  -6   0 284709. 2761.30
   6  -3   0 269238. 2488.08
  -3  -3   3 50586.5 1463.74
   6  -3   3 47685.3 1509.23
  -6   3  -3 44373.6 1164.91
  -3   6   3 44748.3 771.683
   3  -6  -3 49169.0 1490.43
   6  -3   3 41574.1 1533.56
  -6   3  -3 40297.3 1531.71
   3   3  -3 51240.5 1773.83
   3  -6  -3 42526.6 1376.31
  -3   6   3 44471.0 1430.16
  -3  -3   3 43191.8 1642.21
  -3   6   3 45265.1 1395.57
   6  -3   3 44110.7 1140.77
   3   3  -3 44297.0 1364.68
   3  -6  -3 46309.3 785.627
   3   3  -3 43610.1 1394.63
  -6   3  -3 45664.4 1510.23
   3   3  -3 49068.2 1584.66
  -3  -3   6 28607.5 1635.29
   3  -6  -6 26981.2 1382.83
   6  -3   6 29285.2 1187.29
  -6   3  -6 26991.3 1553.97
  -6   3  -6 31432.0 1662.70
   3   3  -6 27651.6 1492.46
  -3   6   6 30007.6 1414.46
  -6   3  -6 32727.3 1306.56
   3  -6  -6 29773.5 949.749
   3   3  -6 29886.7 1453.29
   3  -6  -6 26691.9 1531.45
  -3   6   6 29602.3 917.777
   3   3  -9 24119.7 1760.81
  -6   3  -9 25412.6 1890.38
  -3  -3   9 23738.6 1760.99
   3  -6  -9 31479.9 2139.97
   3  -6  -9 26517.0 1203.26
   6  -3   9 25261.3 1400.00
  -6   3  -9 27465.3 1860.96
   3   3  -9 30293.8 1763.37
  -3   6   9 28100.4 1673.94
  -6   3 -12-415.540 473.809
  -6   3 -12-336.234 397.968
   3   3 -12 691.048 426.849
   3  -6 -12-152.609 481.315
  -3  -3  12 798.415 544.444
   4  -6  10 18746.3 1533.43
  -4   6 -10 18673.9 1676.93
  -4   6 -10 18683.4 1632.38
   6  -2 -10 19573.5 1245.92
   6  -2 -10 15930.5 1596.39
  -2  -4 -10 19475.0 1408.42
  -6   2  10 17054.1 1565.47
  -2  -4 -10 17357.3 1741.60
   6  -2  -7 7462.36 627.763
  -2  -4  -7 6896.11 899.487
  -4   6  -7 5227.82 735.227
   4  -6   7 7458.31 824.022
  -6   2   7 6893.15 861.689
   2   4   7 5962.36 517.854
   6  -2  -7 6273.03 800.861
   6  -2  -7 5598.68 560.875
  -2  -4  -7 5815.70 516.636
  -4   6  -7 7648.28 845.741
  -2  -4  -7 7039.89 716.265
   2   4   4 42372.7 1441.75
  -2  -4  -4 38806.2 1389.23
  -6   2   4 40219.1 1695.36
  -4   6  -4 40249.6 1661.61
   4  -6   4 40994.2 1582.45
  -4   6  -4 44901.6 1646.20
   2   4   4 40223.4 876.039
   6  -2  -4 40937.4 1184.69
   6  -2  -4 42041.5 1567.44
   6  -2  -4 40815.7 1093.42
   4  -6   4 40859.4 1341.57
  -4   6  -4 40345.6 1386.13
  -2  -4  -4 40213.7 1662.47
  -2  -4  -4 42225.7 890.706
  -6   2   1 456479. 4359.91
  -4   6  -1 404848. 3942.88
  -6   2   1 413100. 3531.41
   2   4   1 407641. 3928.02
   6  -2  -1 406418. 4206.49
   6  -2  -1 433443. 3633.26
  -4   6  -1 452298. 4273.73
   4  -6   1 447663. 4188.40
   2   4   1 444806. 4032.07
   4  -6   1 425056. 3938.11
  -6   2   1 439504. 3633.39
  -2  -4  -1 397288. 3873.26
   2   4  -2 326339. 4074.84
  -6   2  -2 345255. 3943.21
   4  -6  -2 320088. 3159.78
  -4   6   2 340872. 3207.11
   6  -2   2 363618. 4191.20
   4  -6  -2 359815. 3956.64
  -6   2  -2 318524. 2669.85
   6  -2   2 322065. 3760.29
  -6   2  -2 336089. 4110.10
  -2  -4   2 348324. 4135.91
  -4   6   2 342281. 3878.07
  -6   2  -2 341831. 2834.21
   2   4  -2 320542. 3635.59
   2   4  -2 284905. 3008.46
  -2  -4   2 345983. 3290.51
   2   4  -2 320656. 3876.21
  -6   2  -5 5213.28 640.860
   6  -2   5 4577.87 402.062
   2   4  -5 5740.06 624.882
  -4   6   5 4087.89 247.655
  -4   6   5 4563.16 555.029
   4  -6  -5 3484.42 510.404
   4  -6  -5 3514.65 498.241
  -6   2  -5 5164.45 628.755
  -2  -4   5 5674.63 694.834
   2   4  -5 4227.26 544.123
   4  -6  -5 3897.32 254.513
  -6   2  -5 4890.69 418.283
  -6   2  -8 695.700 314.470
   4  -6  -8-137.454 341.124
  -4   6   8 265.986 138.291
  -6   2  -8 492.820 236.876
   6  -2   8 292.508 175.788
   2   4  -8 117.435 235.047
  -2  -4   8 98.3279 211.663
  -6   2  -8-21.7842 262.221
   4  -6  -8 344.634 182.318
  -4   6   8 373.723 265.607
   2   4  -8 9.69048 240.225
  -6   2 -11 592.174 519.020
  -6   2 -11 167.400 341.451
   2   4 -11 702.769 389.949
  -4   6  11-21.9973 257.694
   4  -6 -11 393.319 421.504
   2   4 -11 389.492 410.190
  -2  -4  11 305.875 394.489
  -1  -5 -11 914.052 544.947
   6  -1 -11 1259.71 581.305
  -5   6 -11 1029.05 528.061
  -5   6 -11 473.875 439.353
  -6   1  11 1658.08 616.130
   5  -6  11 311.641 354.535
   6  -1  -8 6981.33 921.258
  -1  -5  -8 4738.08 824.318
  -1  -5  -8 4235.63 517.522
   1   5   8 5224.31 556.303
   6  -1  -8 4464.94 558.480
   5  -6   8 4608.46 695.888
  -1  -5  -8 6599.84 719.479
  -6   1   8 5011.66 791.405
  -5   6  -8 4216.93 719.083
  -5   6  -8 4963.31 768.356
   1   5   5 19478.8 799.454
   5  -6   5 21917.2 1200.05
  -1  -5  -5 19010.5 795.380
  -1  -5  -5 15615.8 1134.30
  -5   6  -5 21727.9 1178.99
   1   5   5 21742.3 1039.00
  -1  -5  -5 20341.3 1020.00
   6  -1  -5 19495.0 913.176
  -5   6  -5 21643.0 1197.71
   6  -1  -5 19577.7 964.283
   6  -1  -5 20377.2 1215.02
  -5   6  -5 21820.3 1356.92
  -6   1   5 23126.9 1400.74
  -5   6  -2 71141.8 1906.95
   1   5   2 66651.4 1686.05
   5  -6   2 61334.4 1659.52
   5  -6   2 64490.5 1767.77
  -6   1   2 76466.0 2006.81
  -1  -5  -2 68615.0 1197.95
  -1  -5  -2 65891.0 1731.83
   6  -1  -2 65029.0 1504.15
  -5   6  -2 66410.8 1223.11
   6  -1  -2 67133.3 1605.90
   1   5   2 69264.9 1221.12
  -1  -5  -2 68862.3 1586.82
  -6   1   2 64862.5 1501.40
  -5   6  -2 63968.0 1686.39
  -6   1   2 71560.1 1654.72
   5  -6   2 65703.4 1176.53
   1   5   2 63973.7 1517.67
   6  -1  -2 62746.5 1829.06
   5  -6  -1 17098.0 869.354
   1   5  -1 17278.7 852.390
  -5   6   1 16382.9 860.905
   5  -6  -1 18851.3 599.644
   6  -1   1 20346.0 841.675
   6  -1   1 16699.5 649.002
   5  -6  -1 18325.7 583.558
  -6   1  -1 17742.6 880.361
  -6   1  -1 19168.9 705.082
  -5   6   1 17818.2 562.715
  -5   6   1 17610.9 605.697
  -1  -5   1 18596.3 664.938
   1   5  -1 18832.2 663.621
   6  -1   1 18670.6 901.879
  -6   1  -1 17898.4 803.345
   1   5  -1 20674.2 894.598
   1   5  -1 18069.0 902.807
  -1  -5   1 18436.6 879.802
  -1  -5   4 28585.6 1432.43
  -1  -5   4 28012.2 1164.34
  -5   6   4 28081.4 1245.72
  -6   1  -4 28706.5 1406.61
   5  -6  -4 29830.2 1311.69
   1   5  -4 28008.1 1185.40
   6  -1   4 29938.6 760.632
   6  -1   4 27932.4 1356.22
  -5   6   4 32011.9 1431.59
   5  -6  -4 32561.3 1430.62
  -6   1  -4 31022.0 795.868
  -6   1  -4 29141.5 1420.27
   1   5  -4 27883.3 1302.73
  -1  -5   4 27876.0 1267.87
   5  -6  -7 2373.39 518.291
   6  -1   7 2685.33 355.730
  -6   1  -7 2190.70 546.493
   5  -6  -7 2237.03 256.027
  -6   1  -7 2265.44 340.310
   1   5  -7 2651.75 512.494
  -5   6   7 1953.30 220.881
  -5   6   7 2026.22 429.201
   1   5  -7 2127.89 455.038
  -1  -5   7 1995.65 487.907
  -6   1  -7 2135.56 496.733
  -5   6  10 22746.3 1678.04
  -6   1 -10 17839.2 1566.40
   1   5 -10 21354.7 1778.51
  -6   1 -10 18299.0 1737.54
   1   5 -10 19085.0 1582.46
   5  -6 -10 18109.2 1690.79
  -1  -5  10 21893.0 1789.11
  -6   6 -12 1020.96 539.225
  -6   0  12 342.436 401.101
   0  -6 -12 728.234 542.119
  -6   6 -12 1698.07 624.259
   6   0 -12 210.808 421.495
   6  -6   9 11403.9 1082.95
   6   0  -9 8283.70 869.064
  -6   0   9 11234.4 1249.76
   0  -6  -9 11281.4 932.633
   0   6   9 9043.41 809.067
  -6   6  -9 8458.48 1090.70
   0  -6  -9 10454.4 1293.65
  -6   6  -9 11826.4 1282.13
   6   0  -9 6855.84 962.464
   0  -6  -6 32386.7 1300.89
   0  -6  -6 33833.6 1812.66
  -6   6  -6 31871.2 1606.26
   6  -6   6 32328.5 1509.90
   6   0  -6 30630.3 1329.73
  -6   0   6 31015.7 1780.71
   0   6   6 30004.6 1243.44
  -6   6  -6 32787.1 1784.12
   6   0  -6 31620.4 1427.95
   6   0  -6 30642.3 1630.02
   0  -6  -6 29707.5 1210.36
   0   6   6 33229.5 1243.72
   0   6   3 7025.00 467.589
  -6   0   3 6730.66 554.813
   0   6   3 7765.56 643.408
   6  -6   3 8609.00 724.642
  -6   6  -3 9370.53 791.727
   6   0  -3 7680.37 587.893
  -6   6  -3 7065.08 528.799
   0  -6  -3 7228.86 515.386
  -6   6  -3 7470.70 616.808
   0   6   3 7598.07 465.838
   6  -6   3 8320.94 553.205
   0   6   3 7767.04 535.522
   6   0  -3 8371.79 758.130
   6  -6   3 8067.51 636.652
   0  -6  -3 7864.56 660.843
  -6   0   3 5057.52 500.191
   6   0  -3 7356.22 618.076
  -6   0   3 6042.93 646.612
   0   6   0 406525. 3909.50
   0  -6   0 413939. 3904.02
   6   0   0 401764. 4148.54
  -6   6   0 377860. 3520.23
   6   0   0 414102. 3782.85
  -6   0   0 401980. 3758.72
  -6   6   0 446436. 4328.10
  -6   0   0 406841. 4156.05
   6  -6   0 410707. 3593.63
   0  -6   0 370173. 3957.27
   6   0   0 421873. 3888.21
  -6   0   0 374079. 3591.47
  -6   6   0 440642. 4424.06
   0   6   0 408530. 4065.75
   6   0   3 164258. 3124.80
   6   0   3 167344. 3170.94
  -6   0  -3 150164. 3023.10
   6  -6  -3 171636. 2813.47
   0  -6   3 154060. 2379.91
   0  -6   3 148035. 2827.50
  -6   6   3 169279. 2710.58
   6  -6  -3 167294. 3180.86
   0  -6   3 171438. 3314.87
  -6   6   3 151329. 3058.51
   0   6  -3 150959. 3075.31
  -6   0  -3 174819. 3309.26
   0   6  -3 159757. 2470.86
   0   6  -3 164673. 3061.13
   0  -6   6 25320.4 1546.02
  -6   6   6 22085.0 1373.90
  -6   0  -6 22797.9 1417.87
   6   0   6 22552.1 757.523
   0   6  -6 23762.8 1342.47
   0   6  -6 21256.9 1365.10
   6  -6  -6 22351.7 1405.81
   6  -6  -6 21098.8 531.192
  -6   0  -6 22402.2 1484.51
  -6   0  -6 22461.3 783.052
  -6   6   9 2561.19 595.139
   6   0   9 3285.18 415.932
  -6   0  -9 2242.54 525.340
   0  -6   9 4092.97 754.716
  -6   0  -9 2844.25 675.972
   0   6  -9 3214.64 640.493
   6  -6  -9 3885.80 827.290
   0   6 -12 2428.17 761.222
   6  -6 -12 1672.27 622.939
  -6   0 -12 1740.54 574.609
  -6   6  12 2055.26 618.166
   0  -6  12 2181.79 684.096
  -6   0 -12 4296.47 1072.04
  -1   7 -11 3452.36 885.026
  -6  -1 -11 2722.11 826.640
   1  -7  11 3326.43 792.348
   7  -6 -11 3987.40 982.817
  -7   6  11 3521.33 780.287
  -1   7 -11 2918.02 711.288
  -6  -1 -11 1744.19 548.557
  -1   7  -8 37330.8 2063.94
  -6  -1  -8 40689.9 1226.23
   7  -6  -8 41211.1 1041.43
   1  -7   8 44339.8 2293.36
  -6  -1  -8 41993.4 2147.60
   6   1   8 42077.5 1166.37
  -7   6   8 39870.5 2135.44
  -1   7  -8 47168.2 2234.23
  -6  -1  -8 46274.5 2483.26
   7  -6  -8 43915.6 2312.01
   7  -6  -5-20.6701 146.811
  -1   7  -5 189.606 120.725
  -6  -1  -5 119.181 242.234
  -7   6   5 273.951 199.380
   1  -7   5-45.7324 183.653
  -1   7  -5 356.511 277.089
  -6  -1  -5 411.748 246.837
  -6  -1  -2 7743.71 666.227
   1  -7   2 8408.40 454.998
   1  -7   2 8310.59 655.464
  -1   7  -2 9434.76 705.123
   6   1   2 8597.99 361.640
   7  -6  -2 8185.44 544.756
   6   1   2 8570.45 704.994
   7  -6  -2 8861.30 404.932
   1  -7   2 8641.14 720.818
  -1   7  -2 8044.76 452.016
  -1   7  -2 7800.45 666.655
  -7   6   2 7628.54 515.956
  -7   6   2 7167.62 675.522
   7  -6  -2 10300.5 777.512
  -7   6   2 8025.96 386.914
  -6  -1  -2 8831.05 370.328
   6   1   2 7251.84 594.358
   6   1   2 8445.11 717.847
   6   1  -1 17789.6 921.516
  -7   6  -1 18718.9 909.061
   7  -6   1 17883.1 670.593
  -7   6  -1 17013.0 896.340
  -6  -1   1 16855.8 894.069
  -6  -1   1 18705.2 872.872
   1  -7  -1 19401.3 854.011
  -7   6  -1 17114.1 895.533
   7  -6   1 17691.7 912.940
   1  -7  -1 18813.2 780.280
  -1   7   1 17357.1 813.983
  -1   7   1 17331.3 811.284
   6   1  -1 16871.2 897.483
   6   1  -1 16857.7 828.744
   1  -7  -1 19632.3 865.897
  -6  -1   1 19390.0 971.368
   7  -6   1 18371.9 602.090
  -1   7   1 16394.9 705.611
   7  -6   4 33210.6 1320.50
  -7   6  -4 34488.3 1379.86
   6   1  -4 34235.4 1450.91
  -7   6  -4 27602.6 1466.46
  -1   7   4 32201.6 1082.91
   1  -7  -4 29096.1 1409.58
  -1   7   4 31895.2 1179.38
  -7   6  -4 28896.4 1252.24
  -6  -1   4 29696.5 1559.39
   1  -7  -4 31912.4 1152.69
   6   1  -4 35425.8 1314.52
   1  -7  -4 31970.7 1075.32
   6   1  -4 31247.6 1326.18
   7  -6   4 33371.1 1310.60
  -1   7   7 6864.00 666.679
   1  -7  -7 6861.71 605.151
   1  -7  -7 8565.60 1005.13
  -6  -1   7 7262.80 939.102
   1  -7  -7 7254.49 698.615
   6   1  -7 7734.83 755.020
   7  -6   7 7916.60 794.133
  -1   7   7 6385.02 573.475
   6   1  -7 6823.41 841.637
  -7   6  -7 6884.58 831.514
  -7   6  -7 8277.66 989.505
  -1   7  10 6041.62 741.065
   1  -7 -10 7531.14 1161.00
  -7   6 -10 7363.50 1063.28
  -7   6 -10 6973.14 1047.98
   6   1 -10 5892.74 976.891
   6   1 -10 7192.99 895.146
  -6  -1  10 8541.14 1185.86
   7  -6  10 6874.80 893.180
  -2   7 -12 663.686 445.633
   7  -5 -12 1342.15 581.150
   2  -7  12 1836.92 667.798
  -5  -2 -12 2634.43 835.264
  -7   5  12 2179.42 689.687
  -2   7 -12 3310.24 884.670
   7  -5  -9 187.605 165.431
  -5  -2  -9 559.430 349.503
   2  -7   9 62.1449 227.993
   5   2   9-70.3676 139.946
  -7   5   9 683.101 389.969
   7  -5  -9-236.692 316.972
  -2   7  -9 75.0620 254.159
  -2   7  -9-300.551 241.827
  -5  -2  -9 160.803 389.075
  -5  -2  -6 28290.6 1691.24
  -2   7  -6 26045.8 1380.21
   7  -5  -6 24883.9 765.146
  -5  -2  -6 28338.0 1530.82
   7  -5  -6 25633.0 1496.64
  -7   5   6 26354.1 1582.54
   5   2   6 23356.3 619.369
  -5  -2  -6 22092.2 627.377
   7  -5  -6 23223.4 733.357
   2  -7   6 27352.6 1571.58
  -2   7  -6 26033.2 1549.36
  -2   7  -3 14522.5 960.246
   2  -7   3 11948.2 887.485
  -7   5   3 12662.8 759.877
  -7   5   3 14580.1 985.245
  -5  -2  -3 14250.0 918.047
  -2   7  -3 13333.5 912.085
   2  -7   3 12774.3 637.639
   2  -7   3 14881.5 918.101
   7  -5  -3 14349.8 487.705
   7  -5  -3 13218.6 801.958
  -5  -2  -3 14436.3 980.034
   5   2   3 13058.2 881.407
  -7   5   3 13880.1 465.957
   5   2   3 12304.9 870.378
  -2   7  -3 14187.7 683.137
   7  -5  -3 13128.7 938.104
   5   2   0 132555. 2463.67
   7  -5   0 135933. 2204.26
  -2   7   0 148817. 2263.02
  -7   5   0 147436. 2312.62
  -7   5   0 146229. 2587.44
   7  -5   0 143927. 1822.12
  -7   5   0 146663. 1836.95
   2  -7   0 138458. 2405.45
   7  -5   0 131072. 2404.41
  -5  -2   0 134422. 2498.64
  -2   7   0 142306. 2471.50
  -2   7   0 143559. 1420.69
  -2   7   0 145461. 1578.75
  -5  -2   0 136330. 2277.08
   5   2   0 156984. 2365.81
   5   2   0 140425. 2179.37
  -5  -2   0 137822. 2183.05
  -5  -2   3 33606.2 1560.74
  -7   5  -3 37461.3 1565.59
  -2   7   3 37295.0 1003.59
  -7   5  -3 35366.4 1306.87
   2  -7  -3 33314.1 1305.01
   5   2  -3 37467.0 1307.44
   7  -5   3 39071.7 1597.88
  -7   5  -3 38023.1 1286.20
   5   2  -3 34623.4 1299.99
  -5  -2   3 36983.6 1326.84
   5   2  -3 34195.2 1351.65
   7  -5   3 36536.5 1277.22
   7  -5   3 39412.0 1277.43
  -2   7   3 37242.5 1264.74
   2  -7  -3 36544.3 982.313
   5   2  -3 34323.8 1521.88
  -2   7   3 37315.0 1218.02
  -2   7   3 31341.7 1217.37
   2  -7  -6 297.562 137.385
  -2   7   6 261.417 148.947
  -2   7   6 79.5834 148.102
   2  -7  -6 276.047 154.780
   5   2  -6 105.818 156.254
  -7   5  -6 201.939 144.508
   2  -7  -6 318.173 245.437
  -7   5  -6 490.334 339.682
  -7   5  -6 362.233 211.617
   7  -5   6 380.962 198.854
   5   2  -6-224.121 240.388
  -5  -2   6-92.0309 195.134
  -2   7   9 1375.42 395.852
  -7   5  -9 865.976 389.119
   2  -7  -9 478.574 405.529
   7  -5   9 443.419 292.211
   5   2  -9 1000.19 329.427
   2  -7  -9 1276.43 319.083
  -7   5  -9 661.261 322.714
  -5  -2   9 1176.60 450.495
   5   2  -9 638.523 413.137
  -7   5 -12-491.813 424.349
   2  -7 -12 281.039 437.440
  -7   5 -12-405.272 438.268
   5   2 -12 320.303 384.674
  -5  -2  12 250.006 492.860
   3  -7  10 11749.0 1254.14
  -4  -3 -10 11863.9 1450.04
   7  -4 -10 10942.2 1317.49
  -3   7 -10 13083.8 1412.79
  -3   7 -10 12573.8 1363.60
  -4  -3 -10 12230.0 1199.58
  -7   4  10 12623.5 1378.51
   7  -4  -7 1276.83 239.156
   7  -4  -7 1419.67 392.411
  -7   4   7 1537.55 476.222
  -3   7  -7 1787.37 431.029
  -4  -3  -7 2303.40 445.008
  -3   7  -7 1507.03 396.257
   4   3   7 1490.09 215.164
  -4  -3  -7 1551.91 456.960
   3  -7   7 1649.09 435.094
  -4  -3  -7 1329.28 215.360
   7  -4  -7 1857.21 287.804
  -4  -3  -4 16244.4 1010.35
   3  -7   4 14538.6 1004.55
  -7   4   4 13643.9 1017.55
   3  -7   4 16513.2 841.583
   7  -4  -4 15468.2 608.474
   7  -4  -4 14625.1 934.627
  -3   7  -4 14053.5 802.003
   4   3   4 14655.1 944.849
  -3   7  -4 12646.1 955.824
  -4  -3  -4 17637.9 1161.20
   7  -4  -4 15298.2 559.351
   7  -4  -1 721.400 227.888
   3  -7   1 698.441 212.805
  -7   4   1 686.421 146.609
  -3   7  -1 958.865 93.8333
  -3   7  -1 922.721 223.755
  -7   4   1 904.437 260.206
   7  -4  -1 767.237 162.463
  -4  -3  -1 1048.80 165.677
   3  -7   1 464.602 66.4244
   7  -4  -1 796.495 175.053
   4   3   1 1106.75 232.644
   3  -7   1 1106.34 228.793
  -4  -3  -1 656.036 211.481
   4   3   1 1030.31 168.275
   4   3   1 1045.11 226.543
   4   3   1 990.181 232.537
  -3   7  -1 645.864 190.466
  -7   4   1 874.446 176.895
   3  -7  -2 16879.4 767.054
   4   3  -2 16662.8 965.869
  -3   7   2 15504.0 715.571
  -4  -3   2 14189.5 854.110
  -7   4  -2 17106.2 985.841
  -4  -3   2 17946.1 1007.28
   7  -4   2 14517.0 710.963
  -7   4  -2 15788.6 744.969
  -3   7   2 16533.2 562.609
  -4  -3   2 17241.7 822.636
  -3   7   2 14035.4 785.915
   4   3  -2 15997.7 798.290
   7  -4   2 16022.9 818.447
  -7   4  -2 15384.7 755.130
   4   3  -2 15449.0 876.770
  -3   7   2 15956.8 595.598
   7  -4   2 15907.3 920.094
  -3   7   2 14815.2 765.140
   7  -4   5 7046.32 563.997
  -7   4  -5 6620.69 758.024
   4   3  -5 6113.10 627.833
   3  -7  -5 8391.32 815.072
  -7   4  -5 6086.94 673.348
   4   3  -5 6779.46 680.897
  -3   7   5 6647.55 401.591
   3  -7  -5 7035.66 665.449
  -7   4  -5 7255.26 592.688
  -3   7   5 6720.76 635.882
  -4  -3   5 6466.33 751.412
   3  -7  -5 6974.79 404.415
   3  -7  -8 25944.4 1819.06
   4   3  -8 25797.0 1549.90
   3  -7  -8 23251.9 1001.34
  -7   4  -8 22725.0 1666.69
  -4  -3   8 27284.7 1839.07
  -3   7   8 24185.4 990.400
   7  -4   8 25536.1 1330.30
  -3   7   8 23143.9 1396.55
   4   3  -8 20478.2 1537.66
  -7   4  -8 26565.2 1792.12
  -7   4 -11 334.499 369.653
  -7   4 -11 873.696 589.481
   4   3 -11 276.571 289.344
   4   3 -11 240.245 440.766
  -4  -3  11 185.306 314.350
   3  -7 -11-25.1244 332.156
  -3  -4 -11 21613.3 2072.22
  -3  -4 -11 16990.9 1437.03
  -4   7 -11 18372.4 1769.50
   4  -7  11 17908.0 1625.70
  -4   7 -11 20765.7 1840.20
   7  -3 -11 18534.1 1867.50
  -7   3  11 19394.4 1789.75
  -4   7  -8 10024.2 1049.02
  -3  -4  -8 13619.7 1106.14
   4  -7   8 11416.3 1111.39
   7  -3  -8 13887.3 883.263
  -3  -4  -8 10916.2 702.611
   3   4   8 11281.6 689.821
  -4   7  -8 11707.9 1205.32
  -3  -4  -8 9540.74 1119.66
   7  -3  -8 9397.12 1071.25
   7  -3  -8 10967.0 794.129
  -7   3   8 10364.2 1137.62
  -3  -4  -5 22281.8 1204.08
  -4   7  -5 24207.3 1200.89
   3   4   5 20863.7 1138.51
   4  -7   5 21134.5 1088.75
  -3  -4  -5 21988.2 1384.57
  -3  -4  -5 20752.1 610.320
   7  -3  -5 21421.2 830.550
   7  -3  -5 24423.8 933.426
  -7   3   5 25134.7 1466.31
   4  -7   5 24028.9 1357.89
   7  -3  -5 23178.6 1308.49
   3   4   5 22159.3 620.352
  -4   7  -5 19625.4 1286.51
  -7   3   2 25485.4 988.555
   4  -7   2 29296.8 1205.59
  -4   7  -2 27591.6 716.516
  -4   7  -2 22524.0 1094.31
  -7   3   2 25223.1 867.795
  -4   7  -2 25930.7 1168.72
   7  -3  -2 27012.9 909.709
   3   4   2 25352.6 1139.31
   3   4   2 28413.2 1154.97
   4  -7   2 27654.2 682.680
  -3  -4  -2 27283.0 641.240
   4  -7   2 24649.2 1139.81
  -3  -4  -2 30375.7 1261.29
   7  -3  -2 24820.4 978.864
  -7   3   2 19366.1 1052.03
   7  -3  -2 29556.5 1324.55
  -3  -4  -2 25991.1 1107.84
   3   4   2 26952.1 651.529
   7  -3   1 985598. 6761.90
  -4   7   1 999999. 6554.26
  -4   7   4 140418. 2908.04
   7  -3   4 138527. 2946.67
  -4   7   4 146233. 2865.71
   4  -7  -4 127185. 2729.91
  -3  -4   4 124689. 3058.38
  -7   3  -4 136634. 3004.84
   3   4  -4 144671. 2873.70
  -7   3  -4 144808. 2199.65
   7  -3   4 137713. 2093.94
  -7   3  -4 127915. 3091.13
   3   4  -4 135777. 2747.46
   3   4  -4 142119. 3071.10
   4  -7  -4 132612. 2829.26
  -4   7   7 17012.5 655.865
  -4   7   7 17104.2 1180.68
  -7   3  -7 17216.2 1363.25
   3   4  -7 17361.4 1274.29
  -7   3  -7 15223.1 1293.68
   4  -7  -7 14516.1 638.263
  -7   3  -7 16243.5 959.773
  -3  -4   7 16065.2 1338.72
   4  -7  -7 16877.2 1348.13
   7  -3   7 17887.8 971.583
   3   4  -7 15004.3 1148.74
   3   4 -10 12577.4 1371.27
  -4   7  10 12144.7 1198.85
   4  -7 -10 12402.2 1441.04
   3   4 -10 12062.1 1224.80
  -7   3 -10 10909.3 1309.17
  -3  -4  10 11406.5 1346.16
  -7   3 -10 10710.9 1368.20
  -5   7 -12 3248.96 922.143
  -7   2  12 871.417 459.099
  -2  -5 -12 3705.98 945.484
   7  -2 -12 1758.27 596.645
  -5   7 -12 1854.00 656.163
  -5   7  -9 1180.11 487.711
   7  -2  -9 646.224 335.374
  -2  -5  -9 801.749 305.468
   7  -2  -9 1342.33 360.408
  -7   2   9 2056.81 634.698
  -5   7  -9 1079.25 463.472
  -2  -5  -9 1429.76 456.008
   5  -7   9 1194.97 438.139
   2   5   9 605.528 224.761
  -5   7  -6 48705.3 1928.07
  -2  -5  -6 44477.8 2109.19
   7  -2  -6 44736.3 1431.62
   5  -7   6 46683.5 1946.29
   7  -2  -6 40302.1 1885.47
  -2  -5  -6 45597.1 1222.11
  -5   7  -6 48877.9 2188.62
   7  -2  -6 43420.4 1480.80
  -2  -5  -6 44377.4 1706.88
   2   5   6 42748.0 1651.81
   2   5   6 47843.6 1240.16
  -7   2   6 45190.4 2127.04
  -7   2   3 8933.78 674.220
   7  -2  -3 10181.4 708.040
   7  -2  -3 10275.5 852.797
   5  -7   3 7899.15 670.305
  -5   7  -3 8594.74 535.054
  -7   2   3 9356.39 580.079
  -5   7  -3 9513.42 737.003
   5  -7   3 9853.84 785.364
  -2  -5  -3 9223.55 668.852
   2   5   3 9515.70 413.608
   2   5   3 8860.78 644.966
  -2  -5  -3 8283.08 727.742
  -7   2   3 8312.51 768.218
   2   5   3 8954.15 412.163
   5  -7   3 9110.39 527.547
  -5   7  -3 8744.26 755.718
   7  -2  -3 10651.4 623.816
   2   5   3 9679.31 756.535
  -5   7   0 26817.6 945.157
  -2  -5   0 23183.6 1026.67
  -7   2   0 26390.2 950.647
   2   5   0 28385.5 1029.30
   7  -2   0 23086.3 994.876
  -7   2   0 25075.0 1040.07
   2   5   0 26224.0 868.406
  -2  -5   0 27727.1 932.282
   2   5   0 25458.7 1072.33
  -2  -5   0 26143.6 974.723
   7  -2   0 24596.8 996.297
   5  -7   0 25587.0 1044.97
   7  -2   0 27010.9 947.152
  -7   2   0 27709.4 1058.68
   5  -7   0 26823.6 929.802
  -5   7   0 28041.2 1120.67
   5  -7  -3 70238.8 1796.93
   7  -2   3 65021.4 2027.44
  -7   2  -3 68320.5 1293.86
   2   5  -3 73273.7 2197.70
  -2  -5   3 63333.7 2073.08
  -7   2  -3 71354.4 2060.34
  -5   7   3 68936.0 1721.69
  -7   2  -3 69510.6 2131.71
  -2  -5   3 73653.6 1749.30
   7  -2   3 66630.6 1938.42
   5  -7  -3 69391.5 1983.32
   2   5  -3 68393.0 1689.50
   2   5  -3 69607.8 2077.03
  -7   2  -3 70228.7 1297.54
   2   5  -3 70544.7 1952.22
  -5   7   3 73195.5 2061.66
  -2  -5   6 6640.57 820.969
  -7   2  -6 7072.17 526.301
  -7   2  -6 5867.05 768.986
   2   5  -6 6775.73 759.036
  -7   2  -6 6863.37 817.952
   2   5  -6 5322.90 661.510
   7  -2   6 7176.38 517.012
   5  -7  -6 6029.00 748.761
  -5   7   6 5956.23 698.785
  -2  -5   9-265.075 396.834
  -7   2  -9 280.000 339.485
  -7   2  -9-327.178 363.389
  -5   7   9-311.651 302.576
   5  -7  -9 270.346 260.840
   7  -2   9-36.8770 172.056
   2   5  -9 86.0335 294.833
   2   5  -9-126.156 198.648
  -7   2 -12 545.087 417.075
  -2  -5  12 266.383 355.350
   5  -7 -12-282.788 459.314
   2   5 -12-301.622 410.284
   2   5 -12 114.261 398.829
  -7   2 -12 606.174 596.840
   6  -7  10 403.061 269.626
  -7   1  10 1167.18 513.426
  -6   7 -10 440.237 447.458
   7  -1 -10 1231.12 496.794
   7  -1 -10 1141.63 362.190
  -1  -6 -10 990.497 542.044
  -6   7 -10 632.398 355.757
  -7   1   7 61713.6 2676.35
  -6   7  -7 60832.3 2395.29
   1   6   7 64759.2 1732.62
   6  -7   7 60164.9 2262.39
   7  -1  -7 66057.1 2005.48
  -1  -6  -7 60893.1 1700.59
  -1  -6  -7 61538.6 2031.64
   7  -1  -7 61578.4 2012.12
  -6   7  -7 59679.9 2581.21
   1   6   7 57043.2 1937.15
   7  -1  -7 56588.5 2434.93
  -1  -6  -4 94.2124 112.165
   1   6   4 168.854 142.547
  -6   7  -4 45.3982 102.858
  -6   7  -4 318.567 203.068
   1   6   4 343.601 125.264
   7  -1  -4 195.190 121.987
   1   6   4 252.292 109.691
   6  -7   4 8.74587 85.1146
   6  -7   4 406.474 198.937
  -1  -6  -4-85.7307 164.602
  -7   1   4 172.936 169.499
   7  -1  -4 262.672 119.259
   7  -1  -4-42.1853 168.649
  -6   7  -4 333.787 267.816
   6  -7   1 8185.66 318.241
   1   6   1 7678.30 512.684
  -6   7  -1 7811.19 619.545
   6  -7   1 7986.29 288.777
   6  -7   1 8928.79 667.423
   1   6   1 7793.47 504.435
  -7   1   1 7367.38 533.813
   7  -1  -1 8061.12 588.271
  -1  -6  -1 8585.66 526.746
   1   6   1 9410.04 640.228
  -6   7  -1 7379.92 595.761
   7  -1  -1 7402.38 528.602
  -7   1   1 6699.48 568.958
   7  -1  -1 8030.52 637.073
   6  -7   1 9410.09 650.904
   1   6   1 7928.58 559.714
  -1  -6  -1 8313.12 611.343
  -7   1   1 7992.95 584.451
  -7   1  -2 575576. 5669.17
  -6   7   2 544790. 5558.27
   1   6  -2 552081. 5251.67
   7  -1   2 522027. 5313.80
  -1  -6   2 499225. 3993.17
   7  -1   2 560871. 5727.21
  -6   7   2 511269. 3997.14
   7  -1   2 514594. 4888.76
   1   6  -2 579559. 5772.68
   6  -7  -2 537951. 5476.06
  -1  -6   2 529064. 5475.65
   1   6  -2 568092. 5690.11
  -7   1  -5 22072.4 1370.44
  -7   1  -5 22973.7 1419.61
   7  -1   5 18393.8 640.004
  -1  -6   5 19185.2 1315.70
  -6   7   5 19696.2 1234.31
   6  -7  -5 21584.9 1267.24
   1   6  -5 22127.1 1189.66
   1   6  -5 21939.0 1307.97
  -7   1  -5 21373.6 707.933
   1   6  -8 24320.3 1626.89
   6  -7  -8 21535.6 637.759
   7  -1   8 23799.2 1014.86
   6  -7  -8 22158.2 1665.63
  -7   1  -8 21676.7 1008.25
  -7   1  -8 24613.9 1802.85
  -1  -6   8 23601.4 1702.89
  -6   7   8 25453.9 1638.83
   1   6  -8 20640.6 1499.18
  -7   1  -8 22263.4 1621.55
  -7   1 -11 19123.7 1914.84
   1   6 -11 17259.2 1618.16
  -7   1 -11 19732.7 1767.95
  -1  -6  11 14848.9 1599.16
  -6   7  11 15173.4 1489.97
   1   6 -11 15315.1 1619.07
   6  -7 -11 16000.3 1741.53
  -7   0  11 5411.92 1019.68
  -7   7 -11 6990.54 1179.45
   0  -7 -11 5300.75 1055.46
  -7   7 -11 5098.75 992.842
   7  -7  11 6380.56 928.071
   7   0 -11 4954.21 953.716
   7   0  -8 3489.51 543.381
   0  -7  -8 3400.33 492.518
   0   7   8 3868.39 506.734
  -7   0   8 3504.89 719.945
  -7   7  -8 4225.05 767.034
   7   0  -8 3883.85 703.288
   0  -7  -8 2732.02 411.761
   0  -7  -8 3275.45 713.148
  -7   7  -8 3582.50 670.627
   7  -7   8 4496.45 685.635
   7   0  -5 7613.89 639.459
   7   0  -5 6641.23 635.840
   7   0  -5 7504.18 767.827
  -7   7  -5 6366.23 653.404
   7  -7   5 5996.93 642.806
   0   7   5 8286.63 640.487
   0  -7  -5 7914.27 820.246
  -7   7  -5 7501.75 832.007
  -7   0   5 9293.34 935.238
   0  -7  -5 6784.71 583.292
   0   7   5 7341.37 558.260
  -7   7  -5 7023.92 707.089
   7   0  -2 5986.37 524.171
   0   7   2 7558.36 589.638
   7  -7   2 6425.50 413.668
   0   7   2 6479.43 524.726
   7  -7   2 6978.95 632.164
   0  -7  -2 6642.40 577.037
  -7   7  -2 7160.45 659.590
   0   7   2 6957.50 495.619
  -7   0   2 7202.50 597.995
   7  -7   2 5734.60 554.169
  -7   7  -2 7213.50 455.790
  -7   7  -2 6728.92 598.091
   0  -7  -2 6953.42 481.713
   0  -7  -2 7421.04 558.522
   7   0  -2 6509.67 559.061
  -7   0   2 6888.93 662.122
   7   0  -2 5911.59 606.898
  -7   0   2 6258.55 540.412
  -7   7   1 92356.0 1446.94
  -7   0  -1 100492. 2148.25
   0   7  -1 89160.8 1462.28
   0  -7   1 94289.3 1537.53
   0   7  -1 95283.8 2246.11
   7  -7  -1 98243.7 2314.45
  -7   0  -1 91357.3 1659.18
  -7   0  -1 84542.5 2163.68
  -7   7   1 89108.1 1614.93
   0   7  -1 104024. 2329.42
   7   0   1 90538.0 2002.00
   7  -7  -1 89911.1 1442.44
   7   0   1 71750.2 1953.12
   7  -7  -1 94844.0 1608.88
  -7   7   1 91933.0 2283.30
   0  -7   1 87371.8 2162.91
   7   0   1 90386.3 1692.08
   0   7  -1 90412.1 2070.05
   0   7  -4 60004.3 1710.47
   0  -7   4 61524.8 1721.75
   0   7  -4 66265.9 2176.13
   7  -7  -4 63092.3 1942.07
  -7   0  -4 53912.4 2036.46
  -7   0  -4 61698.4 2205.51
   0  -7   4 65238.0 2269.19
  -7   7   4 68702.1 2282.56
  -7   0  -7 66056.6 2816.29
  -7   7   7 65172.5 2582.77
   7  -7  -7 66296.4 2635.72
   7   0   7 69011.1 1320.24
   0  -7   7 68744.3 2764.10
  -7   0  -7 67368.6 2644.59
  -7   0  -7 68331.2 1364.40
   0   7  -7 67145.4 2473.74
   0   7  -7 75327.5 2809.78
  -7   0 -10 1855.22 682.342
  -7   7  10 2446.16 624.395
   0  -7  10 732.421 479.932
  -7   0 -10 1330.12 494.893
   7  -7 -10 1225.14 486.294
   0   7 -10 1883.33 566.190
  -8   7  12 13330.8 1548.02
  -7  -1 -12 13326.0 1514.55
  -1   8 -12 13411.0 1630.33
  -7  -1 -12 11174.0 1667.58
  -1   8 -12 13827.3 1618.51
   8  -7 -12 13765.7 1747.38
   1  -8  12 10461.7 1438.77
  -8   7   9 3896.34 743.614
  -7  -1  -9 3183.63 690.180
   1  -8   9 3067.01 712.669
  -7  -1  -9 4055.91 810.423
  -1   8  -9 3836.46 699.904
  -1   8  -9 3539.61 728.192
   8  -7  -9 3319.62 690.284
   1  -8   6-86.6825 182.731
  -1   8  -6 174.555 232.016
  -1   8  -6-192.471 204.527
   8  -7  -6 173.421 202.625
  -7  -1  -6 219.747 320.846
  -7  -1  -6 652.122 299.781
  -8   7   6 362.873 260.161
   1  -8   3 68816.7 2237.61
  -8   7   3 68230.7 2244.73
  -8   7   3 66622.9 1752.87
  -8   7   3 67192.7 936.230
   8  -7  -3 68249.0 1818.84
   8  -7  -3 66630.2 933.322
  -7  -1  -3 60843.9 2108.76
  -1   8  -3 72471.9 1632.65
   1  -8   3 73035.8 1599.75
  -7  -1  -3 66408.6 2158.61
  -1   8  -3 65672.3 2085.67
  -7  -1   0 163855. 2759.90
  -1   8   0 163745. 2672.09
   1  -8   0 172630. 2899.60
  -8   7   0 160379. 3034.17
   7   1   0 128109. 2394.11
  -1   8   0 175694. 2247.24
  -8   7   0 169095. 2698.48
   7   1   0 196485. 3270.39
  -8   7   0 170696. 1931.90
  -1   8   0 171856. 1954.98
  -7  -1   0 168627. 2668.69
  -1   8   0 157494. 2830.48
   8  -7   0 171711. 1887.46
   8  -7   0 183002. 2810.44
  -1   8   0 163498. 2914.49
   7   1   0 166693. 2673.08
  -7  -1   0 173071. 3095.76
  -8   7  -3 49388.2 1656.80
   7   1  -3 45032.9 1578.44
  -1   8   3 45564.6 1413.58
   1  -8  -3 44575.8 1596.28
   1  -8  -3 48639.1 1402.60
  -7  -1   3 47677.6 1882.08
  -7  -1   3 43569.8 1582.48
  -1   8   3 44354.8 1340.31
   8  -7   3 48187.2 1638.48
  -1   8   3 42654.2 1520.06
  -8   7  -3 47921.2 1451.61
   8  -7   3 45569.3 1379.44
  -1   8   3 46134.7 1360.03
  -8   7  -3 46672.5 1859.93
   7   1  -3 48253.5 1652.80
   7   1  -6 513.713 226.645
   1  -8  -6 268.741 198.135
  -7  -1   6-41.0846 244.108
  -1   8   6 357.889 171.914
  -8   7  -6 78.3480 151.836
  -1   8   6 53.9914 129.440
   1  -8  -6 552.751 202.155
   7   1  -6 207.867 172.015
   1  -8  -6 208.454 159.534
   8  -7   6 284.525 210.145
  -8   7  -6 402.649 283.974
   7   1  -9 11390.7 1256.98
  -8   7  -9 12375.9 1355.72
   1  -8  -9 11974.8 877.208
  -8   7  -9 14163.9 1377.62
   7   1  -9 12613.2 1089.42
   8  -7   9 11524.4 1072.93
  -7  -1   9 10709.0 1280.18
   1  -8  -9 14635.0 1526.21
  -1   8   9 11519.3 975.197
  -8   7 -12 1758.10 719.313
   7   1 -12 1777.36 583.884
   1  -8 -12 4197.09 998.169
  -7  -1  12 2685.59 820.553
  -8   7 -12 1748.75 703.730
   2  -8  10 664.516 456.041
   8  -6 -10 1525.03 596.189
  -6  -2 -10 1055.87 609.119
  -2   8 -10 787.131 456.812
  -6  -2 -10 1064.23 393.140
  -8   6  10 559.392 331.701
  -2   8 -10 169.375 282.382
  -2   8  -7 13957.5 1118.76
  -6  -2  -7 14108.7 1328.65
   8  -6  -7 13971.8 1211.24
  -2   8  -7 12569.8 1166.38
   8  -6  -7 12516.1 510.525
  -8   6   7 12188.1 1158.79
   2  -8   7 13153.6 1206.18
   8  -6  -7 13121.8 508.476
  -6  -2  -7 14904.3 1200.92
   8  -6  -4 25078.4 578.054
  -6  -2  -4 27191.9 1419.18
  -2   8  -4 28062.1 1122.81
  -2   8  -4 23606.0 1348.35
   8  -6  -4 24406.3 1227.95
   8  -6  -4 25189.1 526.201
   2  -8   4 25901.5 1431.94
  -6  -2  -4 25833.5 1464.44
   2  -8   4 25734.6 1052.24
   6   2   1 178544. 2885.95
   2  -8   1 173202. 3059.15
  -2   8  -1 190800. 2976.65
  -8   6   1 173275. 3180.84
   8  -6  -1 179720. 3243.57
  -8   6   1 178592. 2301.25
  -8   6   1 190426. 2515.38
   6   2   1 193489. 2358.26
   8  -6  -1 190498. 2496.66
   2  -8   1 190187. 1763.94
   6   2   1 192430. 3281.38
  -6  -2  -1 177300. 2926.85
  -6  -2  -1 183251. 3231.59
  -2   8  -1 187096. 1703.41
   8  -6  -1 188356. 2358.65
  -2   8  -1 186739. 3196.41
  -6  -2  -1 195840. 2371.18
   2  -8   1 191021. 2962.85
  -2   8   2 40057.9 1244.13
  -6  -2   2 39483.3 1486.87
  -8   6  -2 39326.0 1553.73
   8  -6   2 40836.9 1254.77
   8  -6   2 35236.0 1450.69
   6   2  -2 42367.3 1523.82
  -6  -2   2 36528.6 1305.98
   8  -6   2 38246.8 1121.04
  -2   8   2 40326.2 1185.57
  -6  -2   2 35735.8 1506.35
   2  -8  -2 41173.2 1208.63
   6   2  -2 38378.9 1328.37
   2  -8  -2 42017.9 1323.07
   6   2  -2 41706.9 1620.80
  -8   6  -2 39083.3 1355.09
  -2   8   2 40307.7 1333.19
  -8   6  -2 41712.3 1428.68
  -2   8   2 41755.6 1373.44
  -2   8   5 48007.8 1626.13
   8  -6   5 46101.2 1619.78
  -8   6  -5 49976.5 2148.88
   6   2  -5 49021.9 1912.67
   2  -8  -5 42629.2 1869.98
  -2   8   5 49977.1 1309.48
  -8   6  -5 44587.8 1628.42
  -8   6  -5 42934.1 1757.77
   2  -8  -5 47424.4 1277.88
   2  -8  -5 47654.1 1604.36
  -6  -2   5 52566.0 2240.40
   6   2  -5 45302.8 1662.90
   2  -8  -8 4496.42 791.403
  -8   6  -8 5028.99 778.820
   6   2  -8 6210.24 869.330
  -8   6  -8 3660.52 692.060
   2  -8  -8 5261.51 520.084
  -6  -2   8 2902.20 656.749
   8  -6   8 4305.18 606.845
   6   2  -8 5404.81 701.672
  -6  -2  11 4979.54 962.429
  -8   6 -11 5386.85 1040.23
   6   2 -11 3292.05 880.049
  -8   6 -11 5026.56 1002.06
   2  -8 -11 3187.29 820.797
   6   2 -11 5378.24 851.831
   8  -5 -11 6283.97 1113.34
   3  -8  11 5370.64 961.874
  -8   5  11 3085.78 745.167
  -5  -3 -11 7105.41 1035.41
  -3   8 -11 4206.81 864.087
  -3   8 -11 4520.76 911.394
  -5  -3 -11 4961.73 1061.14
  -5  -3  -8 7412.09 444.554
  -5  -3  -8 10288.0 1189.08
  -8   5   8 7335.67 960.253
  -5  -3  -8 7928.67 901.955
   8  -5  -8 8877.26 1059.07
  -3   8  -8 8342.63 1048.04
   8  -5  -8 7344.37 521.416
   3  -8   8 8218.13 1026.89
   5   3   8 6346.44 396.367
   8  -5  -8 5667.80 469.437
  -3   8  -8 7344.00 888.021
  -3   8  -5 29743.2 1310.09
  -8   5   5 30854.8 1666.91
   3  -8   5 28142.3 1551.85
  -5  -3  -5 27629.2 1448.03
  -5  -3  -5 24584.6 1527.47
   8  -5  -5 29058.9 1485.24
   8  -5  -5 30350.9 839.308
   3  -8   5 30194.4 1287.11
   8  -5  -5 30169.9 801.880
  -3   8  -5 28831.9 1587.89
  -8   5   2 2707.34 280.830
   5   3   2 3217.46 450.696
  -3   8  -2 2516.61 401.332
   5   3   2 2217.50 193.897
   3  -8   2 2367.17 361.103
  -5  -3  -2 2407.46 194.429
  -3   8  -2 2565.21 226.198
   8  -5  -2 3144.81 364.896
   5   3   2 2447.06 360.854
  -8   5   2 1744.05 357.713
   3  -8   2 2351.73 208.477
  -8   5   2 2583.27 322.482
  -3   8  -2 2834.65 411.091
   3  -8   2 2507.51 403.081
   5   3   2 3288.81 444.855
   8  -5  -2 2610.09 281.265
  -5  -3  -2 2769.72 407.788
   8  -5  -2 2446.37 399.449
  -3   8   1 325274. 3826.40
  -5  -3   1 367390. 3832.09
   5   3  -1 365091. 4372.86
   8  -5   1 351456. 4183.45
   3  -8  -1 373188. 4090.09
  -3   8   1 350726. 2836.49
   8  -5   1 351877. 3226.33
   3  -8  -1 312095. 2824.07
  -8   5  -1 329297. 3242.12
  -8   5  -1 356284. 4266.62
  -3   8   1 341917. 3268.51
  -8   5  -1 322795. 3706.32
  -5  -3   1 372816. 4447.77
  -5  -3   1 319344. 4002.48
  -8   5  -1 341690. 3990.46
  -3   8   1 341689. 3474.87
   5   3  -1 330568. 4038.93
   5   3  -1 315154. 3571.62
   5   3  -4 11197.2 819.164
   5   3  -4 9869.83 766.221
   5   3  -4 10355.2 832.245
   3  -8  -4 9695.79 811.871
  -3   8   4 10237.7 755.660
  -3   8   4 10497.4 509.132
  -8   5  -4 12430.0 896.183
   8  -5   4 10453.2 798.422
   8  -5   4 11457.9 726.912
  -8   5  -4 10766.5 950.711
   3  -8  -4 9958.05 497.054
   3  -8  -4 10146.0 748.373
  -8   5  -4 10278.6 701.465
  -5  -3   4 11006.5 957.559
   3  -8  -7 84850.6 3074.50
   3  -8  -7 90210.5 1809.80
  -8   5  -7 78556.4 2338.04
  -3   8   7 83916.6 2478.24
   5   3  -7 81928.2 2587.41
  -3   8   7 82359.9 1678.90
  -8   5  -7 87240.4 3144.60
   8  -5   7 80245.3 2276.50
  -5  -3   7 90931.3 3267.01
  -8   5  -7 83190.6 2948.91
   5   3  -7 89487.0 2980.62
   5   3 -10 577.613 383.896
  -5  -3  10 571.888 433.638
   5   3 -10 1044.03 477.555
  -3   8  10 412.104 263.284
   3  -8 -10 1271.95 531.892
  -8   5 -10 897.652 483.551
   8  -5  10 846.256 333.028
  -8   5 -10 713.056 390.479
   4  -8  12 545.378 473.219
   8  -4 -12 486.230 534.745
  -4  -4 -12-242.375 487.303
  -8   4  12 75.4433 450.973
  -4   8 -12-22.0485 357.745
  -4   8 -12-323.677 404.886
  -4   8  -9 8710.93 1122.06
  -8   4   9 8558.07 1112.05
   8  -4  -9 6749.16 1004.78
   4  -8   9 6652.89 948.061
   8  -4  -9 6799.17 607.701
  -4  -4  -9 6852.63 872.376
  -4  -4  -9 6185.30 984.367
  -4   8  -9 9022.69 1092.54
  -4   8  -6 148.039 148.451
  -8   4   6 221.200 270.729
   8  -4  -6 197.513 97.1834
   4   4   6 217.543 59.6109
  -4  -4  -6 233.619 197.375
   4   4   6 290.218 74.9621
  -4   8  -6 19.3464 234.354
  -4  -4  -6 369.108 260.872
   4  -8   6 21.3168 199.380
   8  -4  -6 420.642 234.442
   8  -4  -6 288.041 137.845
  -4  -4  -3 1760.07 360.299
  -4  -4  -3 1081.22 274.177
  -8   4   3 768.778 170.622
  -4   8  -3 1332.31 208.874
   8  -4  -3 1236.56 201.750
  -8   4   3 1027.58 255.843
  -4   8  -3 1868.39 379.278
   8  -4  -3 441.699 178.560
   4  -8   3 1364.19 203.511
  -8   4   3 1317.77 341.792
   4   4   3 812.582 246.114
   4   4   3 1361.24 288.086
   4  -8   3 1869.58 351.296
  -4   8  -3 917.771 270.377
  -4   8   0 29261.7 1054.02
   8  -4   0 25304.7 1105.74
  -8   4   0 27064.3 1098.38
   8  -4   0 27803.0 1107.72
   8  -4   0 27789.4 945.447
   4   4   0 29798.6 1245.92
   4   4   0 29530.3 1087.65
  -4  -4   0 28182.9 1200.13
  -4  -4   0 27223.0 1020.96
   4   4   0 24336.7 952.928
  -4   8   0 30242.0 1221.88
  -8   4   0 25637.0 904.384
   4  -8   0 28725.1 1177.70
  -8   4   0 24445.8 1097.29
  -4  -4   0 26189.9 1017.66
   4  -8   0 27757.4 1000.94
  -4  -4   3 19465.3 957.237
  -8   4  -3 22772.8 1133.71
  -4   8   3 19568.0 931.857
  -8   4  -3 19377.4 1175.69
  -8   4  -3 21453.9 909.479
   4   4  -3 19871.4 1113.31
   4  -8  -3 21976.5 1090.02
  -4   8   3 22176.1 1109.46
  -4   8   3 21814.9 587.303
  -4  -4   3 22686.6 1283.79
   4   4  -3 20915.9 1067.43
  -8   4  -3 20776.4 876.696
   4  -8  -3 22439.3 1056.39
   8  -4   3 22484.6 1093.01
   4   4  -3 20940.1 1011.60
  -4   8   3 21033.9 624.161
   4  -8  -6 9719.21 957.481
  -4  -4   6 10459.0 1052.63
  -4   8   6 10186.0 873.046
  -8   4  -6 12047.4 1072.79
   8  -4   6 10115.9 704.439
   4  -8  -6 9298.02 435.169
  -8   4  -6 9610.65 996.884
  -8   4  -6 7628.55 639.452
  -4   8   6 8960.61 419.521
   4   4  -6 10314.9 908.908
   4   4  -6 10434.7 940.609
   4   4  -9 10068.3 1042.31
  -4  -4   9 8384.02 1121.43
   8  -4   9 8185.26 779.153
  -8   4  -9 8904.18 1145.69
   4  -8  -9 10219.6 1250.90
   4   4  -9 9388.95 1127.71
  -4   8   9 7464.29 886.778
  -8   4  -9 8885.59 1111.24
   4  -8 -12 509.100 429.900
  -4  -4  12 937.598 585.312
  -8   4 -12 450.990 554.983
   4   4 -12 2160.16 743.662
  -8   4 -12 858.716 494.638
  -3  -5 -10-72.1707 244.351
  -5   8 -10 118.048 330.341
  -3  -5 -10-223.021 288.851
  -8   3  10 755.590 472.969
  -5   8 -10 9.63948 246.674
   8  -3 -10-37.0740 374.690
   5  -8  10 332.999 319.759
   8  -3  -7 9136.28 678.688
  -3  -5  -7 6945.15 937.855
   8  -3  -7 8128.43 933.206
   8  -3  -7 8462.25 664.084
  -3  -5  -7 8559.48 842.080
  -5   8  -7 7855.48 858.593
   3   5   7 7732.22 482.083
  -8   3   7 7175.93 927.074
  -3  -5  -7 6313.55 437.049
   5  -8   7 8316.57 925.431
  -5   8  -7 6143.20 864.949
   5  -8   4 37919.3 1640.89
   3   5   4 33961.6 665.795
   8  -3  -4 34657.8 1500.14
   3   5   4 36760.6 1480.52
  -8   3   4 35554.2 1708.22
   8  -3  -4 37016.1 1092.00
   5  -8   4 35016.0 1202.52
  -5   8  -4 31343.7 1568.49
  -5   8  -4 36654.3 1288.81
   3   5   4 33780.5 671.925
  -3  -5  -4 34553.2 1653.12
   8  -3  -4 37809.4 1185.16
  -3  -5  -4 35373.4 1451.21
   3   5   1 2324.72 276.652
  -3  -5  -1 2832.64 384.433
  -3  -5  -1 3055.74 312.134
   8  -3  -1 2349.95 331.858
  -5   8  -1 2864.04 407.398
   5  -8   1 3288.52 400.747
   3   5   1 2905.54 398.203
   8  -3  -1 2062.18 341.888
   8  -3  -1 2181.61 297.441
   5  -8   1 2043.14 340.471
  -8   3   1 2909.96 400.884
  -5   8  -1 2477.35 365.159
   3   5   1 3603.25 424.243
   3   5   1 2713.69 341.613
  -8   3   1 2497.40 322.788
  -8   3   1 2267.27 302.235
  -5   8   2 329201. 3202.00
  -3  -5   2 336551. 3661.36
   3   5  -2 305320. 3977.54
  -5   8   2 331506. 2613.18
  -8   3  -2 328437. 3240.04
  -5   8   2 312727. 2453.44
   3   5  -2 313893. 4305.02
  -3  -5   2 342353. 4528.45
   5  -8  -2 314992. 3230.16
   5  -8  -2 355747. 4333.14
  -8   3  -2 306929. 4371.73
   8  -3   2 346014. 3895.96
   3   5  -2 335318. 4503.69
  -5   8   2 309548. 4174.08
   3   5  -2 321306. 3537.92
  -8   3  -2 328426. 3348.55
   8  -3   2 318630. 4078.58
   8  -3   5 5226.79 430.453
  -3  -5   5 4932.47 677.566
   5  -8  -5 4928.71 629.563
  -5   8   5 4947.55 615.010
  -8   3  -5 5380.30 689.979
   3   5  -5 5619.36 657.667
  -8   3  -5 5781.88 465.730
   3   5  -5 4991.56 593.132
  -8   3  -5 4741.08 663.758
  -8   3  -8 42351.9 1603.50
   3   5  -8 47354.5 2232.34
   8  -3   8 42240.0 1535.10
   3   5  -8 45389.5 2252.48
  -3  -5   8 50410.2 2557.16
   5  -8  -8 50901.2 2532.75
  -8   3  -8 50786.9 2507.80
  -5   8   8 50351.1 2237.73
  -8   3  -8 48590.3 2482.76
   3   5 -11 4188.50 821.617
  -3  -5  11 4928.18 970.734
  -5   8  11 3437.45 705.124
  -8   3 -11 4675.67 991.898
   5  -8 -11 5214.22 1034.17
  -8   3 -11 3982.97 848.185
   3   5 -11 4453.08 919.917
   6  -8  11 1607.24 494.308
  -2  -6 -11 2945.70 861.063
  -6   8 -11 2913.96 773.369
  -6   8 -11 2211.80 703.934
  -8   2  11 1714.83 651.347
   8  -2 -11 1102.51 555.800
   8  -2  -8 28382.9 1834.26
   6  -8   8 26713.8 1667.13
  -6   8  -8 29281.8 1948.26
  -2  -6  -8 29753.1 2017.22
  -6   8  -8 28449.0 1755.39
  -2  -6  -8 28058.0 1538.61
   2   6   8 25893.6 1061.64
   8  -2  -8 28586.9 1333.83
  -8   2   8 25536.8 1853.73
   6  -8   5 10667.5 783.955
  -2  -6  -5 10331.6 976.117
  -6   8  -5 11017.5 822.361
   2   6   5 10349.7 801.543
   6  -8   5 12267.3 969.000
  -2  -6  -5 11447.1 841.159
   8  -2  -5 12372.9 773.486
   8  -2  -5 12899.7 1005.34
  -6   8  -5 12353.1 1080.52
   2   6   5 11711.1 556.898
   2   6   5 11162.9 522.852
  -8   2   5 13442.9 1143.76
   8  -2  -5 12013.6 718.454
   2   6   2 41.6330 113.447
   2   6   2 62.4612 96.0482
   6  -8   2 48.1372 118.818
  -6   8  -2 143.042 84.9554
   8  -2  -2 102.361 111.281
   2   6   2 6.23382 127.840
   8  -2  -2-35.2920 156.637
   8  -2  -2 304.886 165.542
   6  -8   2 217.792 183.494
  -2  -6  -2 29.3159 100.162
  -6   8  -2 79.9047 167.285
  -6   8  -2-45.0461 156.898
   6  -8   2 97.4082 56.2357
  -8   2   2 135.490 184.827
  -8   2   2 152.085 146.875
  -2  -6  -2 128.633 144.301
  -2  -6  -2 277.040 197.509
  -8   2   2 412.350 169.868
   2   6  -1 926.101 240.772
  -6   8   1 748.023 226.012
  -8   2  -1 395.746 159.519
   8  -2   1 790.438 200.762
  -6   8   1 834.017 237.531
  -6   8   1 698.747 154.171
   8  -2   1 805.386 240.946
  -2  -6   1 649.548 148.442
   2   6  -1 1009.16 260.955
  -2  -6   1 198.907 123.102
  -8   2  -1 580.876 173.907
   6  -8  -1 870.723 164.536
   8  -2   1 478.218 152.373
   2   6  -1 367.768 125.366
  -2  -6   1 639.320 194.662
   6  -8  -1 564.445 127.219
  -6   8   1 721.941 122.923
  -8   2  -1 320.277 162.633
   6  -8  -4 56956.7 2025.95
   2   6  -4 57857.1 1979.71
  -8   2  -4 60235.9 1255.58
  -2  -6   4 59451.3 2209.09
   6  -8  -4 63267.9 1978.56
  -8   2  -4 63215.5 2253.31
  -6   8   4 59153.2 2059.56
  -8   2  -4 60104.5 2138.43
  -8   2  -4 62749.7 1259.14
  -8   2  -7 9763.28 1061.14
  -8   2  -7 9690.00 1087.57
  -8   2  -7 10222.5 654.138
   2   6  -7 7221.82 822.969
   2   6  -7 9507.04 967.187
  -6   8   7 10265.4 1003.09
   8  -2   7 9351.66 605.295
   6  -8  -7 10520.6 1082.76
  -2  -6   7 8316.00 994.910
  -8   2 -10 250.401 365.954
  -8   2 -10-154.946 320.188
  -6   8  10-70.9777 233.021
   6  -8 -10 372.634 517.410
   2   6 -10 527.512 404.964
   2   6 -10 332.586 363.798
  -2  -6  10-204.005 328.443
  -1  -7 -12 10940.3 1666.23
  -7   8 -12 8999.20 1372.80
   8  -1 -12 12697.7 1620.79
  -7   8 -12 8444.24 1307.55
  -8   1  12 8897.23 1348.70
   8  -1  -9 1051.05 452.248
  -7   8  -9 1552.53 562.177
  -1  -7  -9 895.354 330.383
   8  -1  -9 1401.07 359.175
   7  -8   9 1353.06 413.563
  -1  -7  -9 1366.38 563.434
   1   7   9 528.703 202.109
  -8   1   9 1549.34 519.936
  -8   1   6 12779.9 1202.83
   8  -1  -6 13602.4 881.488
   1   7   6 14260.1 725.247
   8  -1  -6 11447.3 856.629
   1   7   6 15409.5 777.572
  -1  -7  -6 12017.0 1120.52
   8  -1  -6 16565.5 1234.39
  -7   8  -6 14265.4 1053.14
  -7   8  -6 15552.0 1290.57
   1   7   6 13908.3 941.061
   7  -8   6 14248.7 1070.49
  -1  -7  -6 13440.4 912.743
  -7   8  -3 4789.13 422.136
   1   7   3 4325.19 367.913
  -1  -7  -3 4371.26 481.013
  -7   8  -3 4220.96 561.172
  -1  -7  -3 5133.19 573.786
  -8   1   3 5267.25 644.097
   1   7   3 4407.78 473.781
   1   7   3 4365.18 524.854
   7  -8   3 4320.88 520.612
  -8   1   3 4112.81 454.379
   8  -1  -3 4053.90 461.782
   1   7   3 3974.60 356.795
   8  -1  -3 3904.97 478.802
   7  -8   3 4117.61 381.394
  -7   8  -3 3469.98 477.620
  -8   1   0 90476.1 2014.26
   1   7   0 82595.5 1972.90
   8  -1   0 93635.7 2230.74
   1   7   0 85177.8 1586.55
   7  -8   0 94287.4 1937.18
   8  -1   0 82459.9 1873.93
  -1  -7   0 88848.6 2029.80
  -7   8   0 89030.2 1060.55
   1   7   0 92951.0 2223.42
   8  -1   0 92633.1 2092.98
  -7   8   0 84258.6 1872.10
  -1  -7   0 88300.7 1715.79
  -1  -7   0 90969.1 2197.27
  -8   1   0 84268.4 1938.21
  -7   8   0 86083.3 2126.26
  -8   1   0 91691.4 2204.39
  -7   8   0 80594.4 2167.99
   7  -8   0 87731.5 1058.40
  -1  -7   3 7453.01 773.946
  -7   8   3 7381.32 736.974
   7  -8  -3 7683.47 601.655
  -8   1  -3 8744.37 445.977
  -7   8   3 8133.59 607.017
   7  -8  -3 9008.48 805.913
   1   7  -3 8811.79 604.407
  -8   1  -3 8491.97 418.674
  -8   1  -3 6977.30 721.385
  -1  -7   3 10134.9 642.189
   1   7  -3 8244.07 721.272
  -8   1  -6 3794.54 650.187
   1   7  -6 4680.42 651.505
  -1  -7   6 4659.59 711.100
  -8   1  -6 4380.24 704.123
  -8   1  -6 4250.59 329.392
   1   7  -6 4399.59 590.264
  -7   8   6 2838.49 524.856
   7  -8  -6 3197.31 548.944
  -1  -7   9-36.2414 255.435
   1   7  -9 23.3727 224.786
   1   7  -9-209.001 219.871
  -8   1  -9-52.9801 279.445
   7  -8  -9 650.352 457.961
  -8   1  -9 170.416 315.374
  -7   8   9 9.50944 235.359
  -1  -7  12 43.2315 358.077
  -8   1 -12 1376.39 735.398
   1   7 -12 22.3316 343.079
   7  -8 -12-249.001 498.448
   1   7 -12-202.405 462.554
  -8   1 -12-295.805 476.494
   0  -8 -10 3471.47 854.251
   8  -8  10 3209.54 642.629
   8   0 -10 1516.92 514.692
   8   0 -10 2728.77 562.207
  -8   0  10 3932.23 851.378
  -8   8 -10 2300.25 666.973
  -8   8 -10 2219.07 672.898
   0  -8  -7 4160.16 722.142
   0  -8  -7 3928.81 478.990
   8  -8   7 4333.76 640.846
   8   0  -7 3271.76 611.458
   8   0  -7 4710.01 584.350
   0  -8  -7 4372.62 541.558
   0   8   7 3238.14 443.268
  -8   8  -7 3305.05 602.272
  -8   8  -7 3749.65 726.602
   0   8   7 3876.02 512.650
  -8   0   7 2735.36 612.480
  -8   0   4 53516.3 2199.75
   8  -8   4 50983.8 1561.58
   8  -8   4 50527.5 1807.83
  -8   8  -4 50187.1 1629.13
   0   8   4 47702.7 1513.77
  -8   8  -4 50680.7 1857.58
   0  -8  -4 47555.9 1897.99
   8   0  -4 50537.0 1633.21
  -8   8  -4 50031.2 2060.76
   0   8   4 52637.9 1416.01
   8   0  -4 50153.6 1725.26
   8   0  -4 48444.7 1824.20
   0  -8  -4 48637.5 1546.75
   0   8   4 50797.6 1447.83
   8  -8   1 277795. 2450.17
   0   8   1 273023. 3076.40
   8   0  -1 304142. 4078.89
  -8   8  -1 291222. 4007.49
  -8   8  -1 259097. 3964.96
   0  -8  -1 289032. 3855.08
   0   8   1 278778. 3749.37
   0  -8  -1 284866. 3523.48
   8  -8   1 256893. 2128.92
  -8   0   1 288013. 4005.18
   0   8   1 277072. 3407.92
   0   8   1 267383. 3501.15
  -8   0   1 283324. 4052.56
   8   0  -1 264591. 3900.69
  -8   8  -1 268667. 3888.35
   8   0  -1 267753. 3596.03
   8  -8   1 287986. 3869.45
  -8   0   1 304319. 3851.49
   8   0   2 2053.91 350.797
   8  -8  -2 2446.42 303.496
  -8   8   2 1372.33 326.795
   0   8  -2 2297.47 405.123
   8  -8  -2 2413.11 235.668
   0   8  -2 2296.65 388.061
   8  -8  -2 2078.54 391.193
  -8   0  -2 2521.80 445.763
   0  -8   2 2158.21 404.463
   8   0   2 1961.82 369.847
   0   8  -2 2089.15 399.387
   8   0   2 2295.94 413.090
  -8   8   2 2070.86 227.003
   8   0   2 2225.67 246.070
  -8   8   2 2153.35 278.248
   0   8  -2 1952.63 252.710
  -8   0  -2 2159.65 248.193
   0  -8   2 1873.63 259.599
  -8   8   5 6479.46 769.201
   8  -8  -5 6480.07 710.200
   0   8  -5 8384.04 878.224
   0   8  -5 7160.45 681.175
   0  -8   5 5805.89 757.997
  -8   0  -5 6448.11 818.969
  -8   0  -5 6915.31 793.403
   0  -8   8 767.994 375.228
  -8   8   8 95.9095 218.792
   8  -8  -8 316.762 307.932
  -8   0  -8 382.108 413.998
   0   8  -8 309.660 339.485
  -8   0  -8 533.016 354.872
   0   8  -8 106.116 277.639
   0   8 -11 264.294 500.674
  -8   0 -11 453.373 521.295
   8  -8 -11 692.675 519.008
  -8   8  11 220.022 343.294
   0   8 -11 375.875 402.324
  -8   0 -11 128.345 349.517
   0  -8  11-358.172 482.482
   9  -8 -10 2070.19 652.248
  -8  -1 -10 2367.11 735.096
  -1   9 -10 2350.38 647.892
  -8  -1 -10 1956.16 574.842
   1  -9  10 1768.72 614.364
  -9   8  10 1414.90 563.647
  -1   9 -10 2278.55 671.455
  -9   8   7 3274.41 658.613
  -1   9  -7 2910.08 581.431
   1  -9   7 3511.28 696.644
  -1   9  -7 2935.35 527.803
  -8  -1  -7 3780.80 705.076
  -8  -1  -7 1898.70 541.503
   9  -8  -7 4326.18 703.971
   1  -9   4 8567.76 629.291
  -8  -1  -4 9699.12 928.986
  -9   8   4 9152.93 907.775
   1  -9   4 9275.71 921.483
   9  -8  -4 10982.4 847.402
  -8  -1  -4 7904.82 854.959
  -1   9  -4 9545.05 892.069
  -1   9  -4 8898.39 661.999
  -1   9  -1 98706.9 2338.13
  -9   8   1 99196.0 2632.08
  -1   9  -1 88231.6 2364.46
   9  -8  -1 94613.7 1670.84
   9  -8  -1 90351.2 1852.35
  -1   9  -1 89012.1 1473.94
  -9   8   1 94335.5 1673.72
   8   1   1 87744.4 2161.18
   1  -9   1 94195.8 2442.29
  -9   8   1 89162.3 1865.98
   8   1   1 84678.6 2355.60
   8   1   1 90950.4 1899.10
  -8  -1  -1 90857.1 1853.19
  -8  -1  -1 96158.5 2533.24
  -8  -1  -1 103167. 2414.80
   1  -9   1 91450.1 1583.48
   9  -8  -1 86053.9 2382.67
  -1   9  -1 96710.0 2472.35
   9  -8   2 16180.2 984.279
  -1   9   2 14686.5 836.771
   8   1  -2 14625.1 1004.26
   1  -9  -2 15537.4 847.103
  -9   8  -2 14948.4 952.539
   1  -9  -2 15149.7 870.457
  -8  -1   2 11993.2 942.208
   9  -8   2 15381.7 678.323
  -1   9   2 13728.5 802.006
  -1   9   2 16330.6 884.228
   8   1  -2 16549.9 1019.81
   9  -8   2 15352.7 729.925
   1  -9  -2 13679.3 837.291
  -8  -1   2 14718.8 951.205
   8   1  -2 14878.2 895.071
  -9   8  -2 14803.7 1008.28
  -9   8  -5 8151.86 768.748
   8   1  -5 8964.65 764.715
   9  -8   5 9372.47 808.200
  -1   9   5 7936.02 635.226
   1  -9  -5 8535.95 647.623
  -1   9   5 8614.80 677.868
   1  -9  -5 8055.22 852.839
  -1   9   5 8024.62 634.303
  -9   8  -5 8511.30 926.896
   8   1  -5 8011.92 808.573
  -8  -1   5 7823.07 927.069
   1  -9  -8 22429.0 1762.34
   8   1  -8 21770.2 1369.34
  -9   8  -8 19179.8 1498.64
  -8  -1   8 18210.7 1635.87
   1  -9  -8 19462.5 1084.44
  -9   8  -8 21601.8 1744.56
   8   1  -8 21467.6 1629.66
   9  -8   8 21012.6 1388.09
  -1   9   8 22037.0 1221.74
  -9   8 -11 162.427 433.103
  -8  -1  11-59.2571 378.875
   8   1 -11-125.360 305.539
   1  -9 -11 227.486 455.608
  -9   8 -11-81.3999 354.147
  -7  -2 -11 14409.7 1750.03
   2  -9  11 14511.0 1615.20
  -2   9 -11 13713.2 1587.06
   9  -7 -11 12443.6 1534.42
  -9   7  11 11835.2 1450.28
  -7  -2 -11 8915.71 1174.31
  -2   9 -11 14246.5 1562.79
  -7  -2  -8 45001.1 2581.96
  -2   9  -8 47778.1 2225.95
  -7  -2  -8 51153.1 2431.83
   2  -9   8 54563.7 2638.15
   9  -7  -8 49136.4 2467.06
  -9   7   8 45550.8 2409.05
  -2   9  -8 49485.3 2477.66
  -9   7   5 208.527 171.555
   9  -7  -5 17.7547 173.902
  -2   9  -5 373.181 171.402
  -2   9  -5 26.0366 153.144
   2  -9   5 80.5622 231.456
  -7  -2  -5 178.894 206.492
  -7  -2  -5 362.017 258.849
   2  -9   2 172880. 2052.23
  -7  -2  -2 174066. 1960.36
   2  -9   2 158588. 3307.31
  -9   7   2 159237. 2470.92
  -9   7   2 163118. 3494.70
  -2   9  -2 155637. 3090.32
   2  -9   2 154763. 3042.49
   9  -7  -2 169866. 2225.45
   9  -7  -2 170696. 2613.65
  -7  -2  -2 158991. 3245.96
  -9   7   2 170434. 2217.02
  -2   9  -2 168192. 2019.40
   7   2   2 154927. 2989.24
   7   2   2 175230. 3401.74
   7   2   2 172768. 1991.16
  -7  -2   1 61565.9 1862.03
  -2   9   1 65616.4 1465.82
  -7  -2   1 60742.3 1902.45
  -7  -2   1 75433.0 1923.75
   9  -7   1 66332.8 1923.08
  -9   7  -1 62124.9 1884.10
   2  -9  -1 62907.9 1766.40
  -2   9   1 63551.3 1787.17
  -2   9   1 70232.9 1687.20
   7   2  -1 70975.4 2084.69
  -2   9   1 64355.1 1729.85
  -9   7  -1 61563.6 1846.62
   9  -7   1 63505.7 1312.35
   7   2  -1 67892.8 1844.30
  -9   7  -1 65729.6 1389.18
   7   2  -1 61496.9 1862.68
  -9   7  -1 62661.8 1915.57
  -2   9   4 22650.5 1101.05
   2  -9  -4 21999.8 1244.50
  -7  -2   4 20403.1 1363.82
   2  -9  -4 22183.0 922.478
   9  -7   4 22799.8 1155.14
  -9   7  -4 21157.2 1380.02
  -9   7  -4 22257.4 1174.36
   9  -7   4 21692.2 1107.27
   7   2  -4 21297.7 1131.49
   7   2  -4 21915.8 1219.16
  -2   9   4 21227.4 896.138
  -2   9   4 22585.2 1075.65
  -9   7  -4 22650.8 1182.59
  -2   9   7 6834.40 698.811
   7   2  -7 7034.38 871.294
   2  -9  -7 6061.86 865.152
  -7  -2   7 5960.25 904.961
   7   2  -7 7396.35 768.617
  -2   9   7 6883.37 570.610
  -9   7  -7 6283.60 911.845
   2  -9  -7 5807.02 657.792
   2  -9  -7 6844.47 569.869
   9  -7   7 6487.78 705.792
  -9   7  -7 6224.12 824.566
   7   2 -10 4512.90 734.967
   2  -9 -10 5170.50 1059.15
  -7  -2  10 5368.35 1001.67
   9  -7  10 3049.73 592.754
   7   2 -10 3016.34 718.720
  -9   7 -10 4816.47 903.979
   9  -6 -12 12384.5 1638.51
  -3   9 -12 10816.9 1475.68
  -9   6  12 9363.26 1344.10
   3  -9  12 10422.0 1426.19
  -6  -3 -12 11564.4 1642.01
  -3   9 -12 12099.8 1530.74
  -6  -3  -9 13702.2 1536.58
  -3   9  -9 15232.9 1498.67
   9  -6  -9 12440.0 1350.96
  -3   9  -9 12044.6 1229.39
   3  -9   9 12598.2 1331.11
  -6  -3  -9 12681.3 1249.23
   9  -6  -6 3085.77 532.355
  -3   9  -6 3181.84 487.623
   9  -6  -6 2739.57 234.358
  -6  -3  -6 3435.89 627.550
  -3   9  -6 1726.93 483.677
   9  -6  -6 2985.40 245.188
  -9   6   6 3637.69 662.903
  -6  -3  -6 2478.40 490.696
   3  -9   6 4066.71 676.924
  -3   9  -3 68787.4 1464.95
  -9   6   3 72539.6 1326.09
  -6  -3  -3 67308.4 2141.23
  -3   9  -3 61452.7 2070.38
   3  -9   3 67136.5 2235.73
   9  -6  -3 66520.7 1892.17
   9  -6  -3 72563.5 1391.13
  -6  -3  -3 77193.4 2416.29
  -9   6   3 65367.0 1826.18
   3  -9   3 69918.2 1444.28
  -9   6   3 58556.9 2154.22
   6   3   0 14223.8 805.728
   9  -6   0 13591.3 880.583
  -9   6   0 13481.8 649.366
   9  -6   0 13784.4 806.148
  -6  -3   0 13744.6 780.996
  -3   9   0 13337.3 858.078
  -3   9   0 14314.7 786.029
  -6  -3   0 15128.0 954.136
   9  -6   0 16005.9 712.697
  -9   6   0 14622.7 926.101
  -3   9   0 15945.6 538.467
  -3   9   0 15656.4 479.783
   6   3   0 14797.2 822.983
  -9   6   0 14205.0 841.585
   6   3   0 12783.8 860.296
   3  -9   0 16815.6 956.539
   3  -9   0 15559.8 824.973
  -6  -3   0 13953.1 823.022
   9  -6   3 42805.0 1491.09
  -3   9   3 43362.3 1474.32
  -6  -3   3 37332.0 1720.62
   3  -9  -3 41280.6 1492.54
  -3   9   3 46084.6 1225.30
  -3   9   3 39760.5 1482.22
   9  -6   3 45222.7 1478.42
  -9   6  -3 41082.9 1425.91
  -9   6  -3 42346.4 1495.39
   6   3  -3 42462.3 1671.07
   6   3  -3 38698.5 1473.36
  -6  -3   3 43353.6 1700.99
   3  -9  -3 41900.2 1170.84
  -3   9   3 44153.3 1523.71
  -9   6  -3 39794.5 1737.21
   6   3  -6 5098.96 678.095
  -9   6  -6 5372.88 707.789
  -9   6  -6 4615.02 737.776
  -6  -3   6 4568.00 726.982
   6   3  -6 7443.02 765.059
   9  -6   6 5181.23 567.084
  -9   6  -6 4733.28 561.781
  -3   9   6 4623.09 577.680
  -3   9   6 4837.28 398.175
   3  -9  -6 5893.83 445.358
   3  -9  -6 4802.00 683.346
   3  -9  -6 4806.09 602.612
   3  -9  -9 12940.1 1432.51
  -9   6  -9 13977.8 1471.00
   9  -6   9 17582.4 1222.82
   6   3  -9 16358.4 1321.81
   6   3  -9 17614.0 1540.83
  -3   9   9 15554.8 1210.55
  -6  -3   9 17237.9 1617.76
  -9   6  -9 18122.1 1604.93
   6   3 -12 320.943 411.925
  -9   6 -12-199.209 391.653
   3  -9 -12 1222.65 613.251
  -9   6 -12 230.240 393.618
  -6  -3  12-567.690 561.039
   4  -9  10 5394.22 931.639
   9  -5 -10 4267.27 880.817
  -5  -4 -10 3233.02 816.588
  -4   9 -10 4744.25 893.534
  -5  -4 -10 3712.89 702.562
  -4   9 -10 5896.25 977.616
  -9   5  10 5534.61 1019.48
   9  -5  -7 54148.6 1379.71
  -5  -4  -7 50869.5 2175.55
   4  -9   7 58084.1 2522.70
  -4   9  -7 53093.9 2477.37
  -9   5   7 52449.4 2494.37
  -4   9  -7 52738.9 2149.80
  -5  -4  -7 52474.1 2578.48
   9  -5  -7 57130.7 1377.19
   9  -5  -7 52953.1 2346.37
   4  -9   4 1831.86 273.207
  -5  -4  -4 2197.95 398.329
  -4   9  -4 1386.22 254.022
  -9   5   4 1193.19 376.412
  -4   9  -4 1082.45 333.783
   4  -9   4 1866.65 394.290
  -5  -4  -4 1744.34 414.057
  -9   5   4 1705.85 229.730
   9  -5  -4 1401.00 211.380
   9  -5  -4 1767.21 359.399
  -4   9  -1 424.205 188.853
  -5  -4  -1 316.259 119.212
  -9   5   1 363.229 146.484
   9  -5  -1 475.751 165.640
  -4   9  -1 417.782 193.562
   5   4   1 381.630 122.047
  -9   5   1 460.175 162.578
   5   4   1 16.8040 92.4823
   4  -9   1 412.080 199.315
  -9   5   1 133.566 146.142
  -5  -4  -1 148.765 126.275
   9  -5  -1 378.052 191.056
   5   4   1 330.332 180.675
  -5  -4  -1 679.397 235.046
   4  -9   1 417.027 210.397
   9  -5  -1 499.424 160.943
  -4   9   2 2843.80 309.737
  -5  -4   2 3629.53 486.301
   9  -5   2 2504.79 369.641
  -4   9   2 2759.68 387.661
  -4   9   2 3028.68 422.906
  -4   9   2 2485.61 267.217
   5   4  -2 2391.05 340.189
  -5  -4   2 3260.97 399.421
   5   4  -2 2597.09 424.007
   4  -9  -2 2845.73 336.235
   5   4  -2 2910.69 448.469
  -9   5  -2 3628.11 507.775
  -9   5  -2 2776.11 391.738
  -9   5  -2 2935.25 375.180
  -4   9   2 2466.67 296.837
   9  -5   2 3306.12 375.215
  -5  -4   2 2687.67 432.057
   9  -5   2 3388.00 480.808
  -9   5  -5 37.5080 117.788
  -9   5  -5 68.0784 173.558
   4  -9  -5 10.8506 52.6843
   4  -9  -5 125.761 149.537
  -9   5  -5-17.0516 173.275
   4  -9  -5-89.8520 144.528
   5   4  -5 1.52669 164.887
   9  -5   5 48.8349 89.7694
  -4   9   5 32.6764 116.951
  -4   9   5 78.3120 60.4378
   5   4  -5-64.0974 148.588
  -5  -4   5-60.5204 212.729
   5   4  -8 14054.0 1273.68
  -5  -4   8 13582.8 1381.76
   5   4  -8 15860.5 1265.85
  -9   5  -8 12722.4 1324.88
   4  -9  -8 15853.9 1430.44
  -9   5  -8 12907.2 1277.84
  -4   9   8 14085.7 1146.03
   9  -5   8 14622.8 1006.23
  -9   5 -11 5267.78 1026.24
   4  -9 -11 7016.02 1233.26
   5   4 -11 6628.88 981.701
   5   4 -11 9243.04 1305.77
  -9   5 -11 6960.03 1157.01
  -4  -5 -11 955.224 679.175
   9  -4 -11 505.242 436.567
  -5   9 -11 1464.10 602.552
  -9   4  11 998.624 546.782
  -5   9 -11 117.104 343.492
   5  -9  11 762.618 444.250
  -4  -5  -8 12192.0 1094.92
  -4  -5  -8 13562.3 1387.54
  -5   9  -8 12566.5 1281.59
   5  -9   8 11716.5 1156.46
   9  -4  -8 14260.0 1329.55
   9  -4  -8 12239.3 768.264
  -9   4   8 13603.9 1346.95
  -5   9  -8 11523.0 1120.47
   9  -4  -5 8811.69 542.638
  -4  -5  -5 7507.87 858.122
   9  -4  -5 6359.37 712.134
  -5   9  -5 8565.86 894.756
  -9   4   5 7233.87 866.440
  -4  -5  -5 7623.36 751.322
   9  -4  -5 8787.41 587.697
   5  -9   5 9806.85 919.633
   5  -9   5 7421.31 638.157
  -5   9  -5 7900.82 678.956
   5  -9   2 72284.5 995.444
   4   5   2 82784.8 2101.71
  -5   9  -2 78325.2 2247.24
   5  -9   2 69811.1 2018.12
  -5   9  -2 72359.9 1087.91
  -5   9  -2 69720.7 2067.96
  -4  -5  -2 74229.5 1314.29
   9  -4  -2 67998.4 2190.55
  -4  -5  -2 70876.1 2056.50
   5  -9   2 73130.5 2161.55
  -9   4   2 77946.2 2301.87
   9  -4  -2 66976.1 1623.77
   4   5   2 76382.1 2157.44
   9  -4  -2 78219.4 1915.30
   4   5   2 68368.4 2005.77
  -9   4   2 72496.3 1712.20
   4   5   2 76450.2 1345.51
  -9   4   2 69725.0 1795.38
  -4  -5   1 66611.8 2015.88
  -9   4  -1 74033.5 2076.81
   4   5  -1 76265.3 2049.31
  -5   9   1 70888.2 1537.66
   5  -9  -1 67576.1 1208.44
   5  -9  -1 69072.0 1475.83
  -4  -5   1 67488.1 1674.88
  -4  -5   1 63118.8 1851.08
  -5   9   1 63738.9 1930.81
  -9   4  -1 63755.4 1731.95
  -5   9   1 67333.9 1914.38
   9  -4   1 69966.2 2006.09
  -5   9   1 69006.9 1161.88
   9  -4   1 66271.4 1736.36
   4   5  -1 76092.4 2137.24
  -9   4  -1 66008.4 1659.71
   4   5  -1 67596.2 1662.97
   9  -4   1 72701.7 1688.56
   4   5  -4 15053.7 946.697
  -5   9   4 11736.5 360.078
   5  -9  -4 15381.4 975.391
  -9   4  -4 12062.6 935.635
  -4  -5   4 15221.3 1150.67
  -5   9   4 12313.3 934.971
   5  -9  -4 15555.6 1027.03
  -5   9   4 12113.9 380.161
  -9   4  -4 12885.5 1061.36
   4   5  -4 14109.1 979.901
  -9   4  -4 15040.3 787.016
  -9   4  -4 14345.2 769.630
   5  -9  -7 18702.5 1450.90
  -9   4  -7 20722.5 1552.50
   4   5  -7 20858.8 1397.73
  -9   4  -7 19156.9 1034.26
  -9   4  -7 19388.3 1516.65
  -4  -5   7 18402.4 1526.09
  -5   9   7 22208.9 1397.92
   9  -4   7 19258.9 1010.59
   4   5  -7 19611.7 1403.07
  -9   4 -10 2836.71 767.827
  -4  -5  10 2428.62 679.926
   5  -9 -10 3603.71 841.140
  -5   9  10 3167.08 634.089
   4   5 -10 3787.51 715.896
   4   5 -10 3709.11 790.351
  -9   4 -10 3899.16 835.831
  -6   9 -12 569.676 485.857
   9  -3 -12 1857.99 743.711
  -3  -6 -12 1304.42 713.378
  -6   9 -12 835.159 582.639
  -9   3  12 445.976 436.559
   9  -3  -9 2463.98 652.658
  -9   3   9 3764.69 805.693
  -6   9  -9 2218.25 512.918
   6  -9   9 3945.90 744.547
   9  -3  -9 2683.51 442.843
  -6   9  -9 2882.39 751.785
  -3  -6  -9 2663.43 556.065
  -3  -6  -9 2051.66 598.861
  -6   9  -6 9051.42 1022.00
   9  -3  -6 8057.67 610.048
  -3  -6  -6 7477.29 913.963
   3   6   6 5928.09 348.014
  -3  -6  -6 6601.77 711.885
  -6   9  -6 7384.28 749.214
   9  -3  -6 6628.50 582.533
   9  -3  -6 7243.99 835.957
   6  -9   6 6969.31 805.407
  -9   3   6 8357.22 976.744
   3   6   6 7577.91 394.003
  -9   3   3 46957.0 1904.88
   6  -9   3 42034.0 1689.48
  -3  -6  -3 45395.9 1790.65
  -6   9  -3 42424.3 1764.26
  -6   9  -3 45558.7 1182.06
   9  -3  -3 42391.2 1347.94
   9  -3  -3 46525.3 1628.03
   3   6   3 41139.0 949.336
   3   6   3 39813.3 1542.84
   6  -9   3 44345.7 1094.04
   3   6   3 42843.1 955.123
  -3  -6  -3 41350.2 1570.82
  -9   3   3 42794.7 1357.81
   6  -9   0 31355.8 1316.95
  -9   3   0 32933.9 1198.99
  -9   3   0 30864.6 1288.52
  -6   9   0 31346.2 1170.38
  -3  -6   0 29769.0 1149.16
   3   6   0 32793.9 1242.35
  -9   3   0 29447.3 1250.67
   6  -9   0 30145.6 1110.14
  -6   9   0 31640.1 1327.38
   9  -3   0 28885.6 1078.60
  -3  -6   0 31996.4 1158.37
   3   6   0 29627.1 1310.21
   9  -3   0 33163.4 1326.76
   3   6   0 32214.7 1113.57
  -3  -6   0 36050.7 1443.11
   9  -3   0 29903.8 1247.49
   9  -3   3 9751.91 792.556
  -6   9   3 8819.92 358.069
   6  -9  -3 9414.76 682.809
  -6   9   3 9943.04 827.682
  -3  -6   3 9097.70 664.424
  -6   9   3 8337.24 340.797
  -3  -6   3 9152.24 845.342
   9  -3   3 8770.98 723.685
  -6   9   3 10050.5 672.634
   6  -9  -3 7854.25 715.034
   3   6  -3 9427.52 683.567
  -9   3  -3 9457.47 858.577
   3   6  -3 9568.75 791.292
  -9   3  -3 8815.91 564.424
  -9   3  -3 9607.62 574.474
  -3  -6   6 11870.8 1160.93
  -9   3  -6 11660.7 681.675
   3   6  -6 10592.0 953.564
  -9   3  -6 11847.1 1124.37
  -9   3  -6 12159.2 1175.22
   3   6  -6 11092.6 1008.53
   6  -9  -6 11600.7 1044.33
  -6   9   6 10104.1 929.004
   9  -3   6 12275.5 680.365
  -9   3  -9 859.470 356.880
  -9   3  -9 2175.93 628.390
  -6   9   9 2751.95 602.083
  -3  -6   9 1421.42 558.345
   3   6  -9 2452.76 573.812
   3   6  -9 2698.98 623.326
   6  -9  -9 1876.91 571.521
  -9   3 -12 488.872 495.564
   3   6 -12 371.869 407.895
   3   6 -12 275.151 462.495
  -9   3 -12 160.067 561.637
  -2  -7 -10-251.964 396.377
  -7   9 -10-86.4709 286.868
   7  -9  10 200.270 288.454
  -7   9 -10 595.342 415.152
   9  -2 -10-437.326 359.984
  -9   2  10-269.967 304.707
  -2  -7 -10-65.1682 287.973
  -7   9  -7 8014.69 1021.62
  -2  -7  -7 8511.04 1066.67
   2   7   7 9315.82 579.209
   9  -2  -7 7612.30 718.538
   9  -2  -7 9383.79 749.162
   2   7   7 7855.92 523.932
  -7   9  -7 7663.74 845.915
   7  -9   7 8392.84 916.530
  -2  -7  -7 9257.33 855.736
  -9   2   7 9262.79 1099.01
   9  -2  -7 8657.35 999.130
  -9   2   4 3891.11 602.820
   9  -2  -4 4741.70 505.144
   2   7   4 5480.50 588.714
  -7   9  -4 4422.23 456.382
  -9   2   4 3916.22 443.643
  -2  -7  -4 3793.66 568.890
  -7   9  -4 3663.16 582.895
   2   7   4 4817.64 357.811
   9  -2  -4 4508.53 571.028
   2   7   4 4048.24 344.637
   7  -9   4 4631.15 602.075
  -2  -7  -4 4547.26 537.209
   7  -9   4 4372.34 434.983
  -9   2   1-61.5160 131.521
   2   7   1 33.7649 118.556
  -9   2   1 103.091 116.264
  -7   9  -1 270.772 182.324
   7  -9   1-119.220 135.040
  -7   9  -1 7.22340 124.682
   2   7   1 83.2418 95.5015
   7  -9   1 411.575 201.591
   2   7   1-59.1853 100.146
   9  -2  -1 284.983 188.558
  -9   2   1 27.2467 135.627
   9  -2  -1 186.948 142.776
   9  -2  -1-10.8590 100.954
  -2  -7  -1-94.2885 153.273
  -2  -7  -1 93.2269 107.691
   2   7   1 135.319 123.099
   9  -2   2 69049.0 1543.54
   2   7  -2 68269.0 2162.53
  -9   2  -2 72460.3 2233.80
   9  -2   2 74115.1 2008.35
   2   7  -2 63151.5 2065.35
   7  -9  -2 78093.1 2262.89
   2   7  -2 70589.7 1663.47
   7  -9  -2 72827.8 1254.43
  -7   9   2 68319.0 1458.32
  -2  -7   2 67411.5 1627.62
  -9   2  -2 69168.0 1588.27
  -7   9   2 73762.2 1325.82
  -2  -7   2 72703.5 2227.46
  -7   9   2 69755.8 2159.32
   7  -9  -2 70215.6 1550.98
   9  -2   2 65444.1 2015.07
   2   7  -2 75738.4 2127.75
  -9   2  -5 14797.7 637.225
  -9   2  -5 15779.8 655.080
  -2  -7   5 13857.8 1160.72
  -7   9   5 15678.7 1174.04
  -9   2  -5 17085.4 1277.50
   2   7  -5 15523.1 1024.69
  -9   2  -5 13713.6 1143.38
   7  -9  -5 17556.6 1161.24
   2   7  -5 14896.1 1123.05
  -9   2  -8 36346.4 2250.71
  -2  -7   8 34570.8 2172.43
   2   7  -8 35530.1 2051.28
  -7   9   8 32411.7 1904.62
  -9   2  -8 31273.5 2012.87
   2   7  -8 33206.8 1911.06
   7  -9  -8 34537.8 2082.55
  -9   2 -11 976.836 551.530
   2   7 -11 229.740 494.910
  -2  -7  11-147.997 358.795
  -7   9  11 394.679 455.699
   7  -9 -11 82.7853 405.113
   2   7 -11 643.029 433.317
  -9   2 -11-594.371 517.875
  -8   9 -11-938.493 483.623
  -1  -8 -11 397.707 531.324
   8  -9  11-36.7641 286.989
   9  -1 -11 587.204 499.992
  -9   1  11 157.908 394.709
  -1  -8  -8 5812.33 908.498
  -9   1   8 5308.16 909.099
   9  -1  -8 5284.45 620.174
  -8   9  -8 3905.59 822.022
  -1  -8  -8 5258.61 664.650
   9  -1  -8 5133.24 828.259
   8  -9   8 6470.40 843.750
   1   8   8 6065.75 549.771
   8  -9   5 11147.2 801.374
   9  -1  -5 12826.4 839.216
   8  -9   5 14751.0 1081.65
  -1  -8  -5 13772.0 914.620
  -8   9  -5 13221.9 1166.97
   1   8   5 12908.3 698.487
   1   8   5 10550.5 815.794
   9  -1  -5 11959.0 1023.24
   1   8   5 12482.4 661.739
  -1  -8  -5 14555.0 1168.07
  -8   9  -5 12764.2 901.058
   9  -1  -5 12102.1 880.991
  -9   1   5 11695.7 1120.11
   1   8   2 52152.9 1690.91
  -1  -8  -2 47915.1 1666.99
  -1  -8  -2 44241.0 1564.78
   9  -1  -2 51668.3 1661.76
  -8   9  -2 49485.9 1832.43
   8  -9   2 48345.4 1745.20
  -8   9  -2 50103.6 1807.46
   1   8   2 50087.0 1442.04
   8  -9   2 50338.1 1804.82
   1   8   2 49777.9 1676.59
   9  -1  -2 47308.1 1617.81
  -9   1   2 51261.1 1924.30
  -9   1   2 43422.4 1555.88
   8  -9   2 47866.9 1034.28
  -1  -8  -2 51543.1 1421.78
   8  -9   2 50053.3 1016.25
  -8   9   1 83967.3 1752.67
  -8   9   1 83519.4 2411.52
   1   8  -1 84821.9 2348.01
   9  -1   1 88769.4 1933.65
  -9   1  -1 88771.1 1924.14
   1   8  -1 90619.3 2264.37
  -8   9   1 98099.8 2437.62
   1   8  -1 88032.8 2320.17
  -1  -8   1 84636.2 1707.33
  -9   1  -1 76239.4 2017.95
  -9   1  -1 93024.0 2491.31
   8  -9  -1 85763.1 1729.62
  -8   9   1 86704.5 1394.04
   1   8  -1 93703.5 1766.44
   9  -1   1 81232.1 2316.63
   9  -1   1 92537.2 2191.95
  -1  -8   1 79642.5 2223.40
   8  -9  -1 90057.6 1464.44
  -8   9   4 8127.56 850.783
  -9   1  -4 8832.39 411.275
  -9   1  -4 8207.29 871.403
   8  -9  -4 9057.28 756.093
  -1  -8   4 7934.68 874.859
  -9   1  -4 8546.30 428.481
   1   8  -4 9164.47 860.922
   1   8  -4 9252.42 717.358
  -9   1  -4 8807.07 877.836
  -9   1  -7 105.498 76.3491
  -9   1  -7 60.5014 259.277
  -8   9   7-21.2904 266.412
   1   8  -7-150.017 218.034
   1   8  -7 43.5629 184.709
   8  -9  -7 269.360 287.429
  -9   1  -7 290.259 317.695
  -1  -8   7-14.9811 221.037
  -9   1 -10-155.819 321.810
  -9   1 -10 438.762 386.898
  -1  -8  10 685.912 480.504
   1   8 -10 196.031 349.013
   1   8 -10-300.192 288.793
  -8   9  10 306.291 368.299
   8  -9 -10 428.607 417.572
  -9   9 -12 1871.87 728.832
  -9   0  12 575.067 603.190
   9   0 -12 2270.52 746.776
  -9   9 -12 968.640 656.789
   0  -9 -12 799.926 570.074
  -9   0   9 11557.6 1363.79
   0  -9  -9 12018.3 1426.59
   9  -9   9 14445.6 1279.75
  -9   9  -9 12077.8 1269.39
  -9   9  -9 12043.8 1407.84
   0  -9  -9 12060.9 956.919
   9   0  -9 12293.0 1066.34
   9   0  -9 15102.4 1473.82
  -9   9  -6 20443.6 1274.93
   0   9   6 17348.3 918.460
   0   9   6 18165.6 911.083
  -9   9  -6 17324.7 1417.17
   0   9   6 17314.9 1031.81
   9   0  -6 17439.4 1295.25
  -9   0   6 17292.6 1446.43
   9   0  -6 18418.0 1080.82
   0  -9  -6 19469.4 1441.44
   0  -9  -6 18914.6 1081.76
   9  -9   6 19283.2 1266.28
   0   9   3 12844.6 841.353
   0   9   3 12882.7 909.011
   9   0  -3 9647.11 795.309
   9  -9   3 12559.1 922.204
  -9   0   3 12661.2 890.573
   9  -9   3 12812.1 692.294
   9   0  -3 14225.5 961.586
   0   9   3 12614.8 753.098
  -9   9  -3 12992.4 732.422
   0  -9  -3 14028.1 979.446
  -9   9  -3 15297.7 1121.16
   0   9   3 13265.5 761.232
  -9   0   3 12533.0 1035.13
   0  -9  -3 13802.9 879.914
  -9   0   0 23947.7 1128.44
  -9   0   0 25305.2 1304.80
  -9   9   0 24344.6 1311.08
   0   9   0 25165.0 1207.20
   9  -9   0 25852.9 1120.44
   9   0   0 22733.8 1113.02
   0   9   0 26047.6 1189.32
  -9   9   0 24134.9 1106.73
   0   9   0 25262.1 891.397
  -9   9   0 26310.6 1294.03
  -9   9   0 26060.9 727.679
   9   0   0 26992.0 1328.48
   0  -9   0 24024.7 1173.22
   9   0   0 25415.9 1157.98
   9  -9   0 26075.3 723.653
   0   9   0 24487.8 1240.53
  -9   0   0 23321.3 1142.83
   0   9  -3 134551. 2332.46
   9  -9  -3 126830. 1419.65
  -9   9   3 123546. 1462.85
  -9   9   3 150365. 3562.16
   0   9  -3 123510. 3000.60
  -9   0  -3 122583. 3210.73
  -9   0  -3 127713. 1613.95
   9  -9  -3 132406. 2594.35
   0  -9   3 129292. 2294.84
   0  -9   3 140304. 3418.23
  -9   9   3 133146. 2498.97
   9   0   3 144238. 3179.29
  -9   0  -3 131308. 1687.98
   9  -9  -6 32319.6 1728.48
  -9   9   6 31925.3 1834.21
   0   9  -6 32951.2 1853.97
   0   9  -6 31807.7 1556.95
  -9   0  -6 29298.5 1759.07
  -9   0  -6 33742.1 1984.24
   0  -9   6 31682.6 1894.07
   0   9  -9 9312.60 1088.43
  -9   0  -9 8028.05 1089.29
  -9   0  -9 9981.21 1295.40
   0   9  -9 8543.04 1102.47
   9  -9  -9 5884.98 938.165
   0  -9   9 5930.20 979.652
  -9   9   9 7555.94 1066.81
   9  -9 -12 5287.67 1102.49
   0  -9  12 3364.51 914.058
  -9   0 -12 3097.42 856.954
   0   9 -12 5196.80 1056.75
  -9   9  12 4475.78 911.112
  -9   0 -12 1938.96 848.869
   0   9 -12 3795.59 881.238
  10  -9 -11 1515.95 687.739
  -1  10 -11-52.4963 306.018
   1 -10  11-403.929 455.555
  -1  10 -11-224.863 418.180
  -9  -1 -11 164.462 368.850
  -9  -1 -11 940.362 719.731
 -10   9  11 859.642 469.268
  -9  -1  -8 108.178 307.561
  -1  10  -8-245.938 312.431
   1 -10   8 23.1346 288.400
  10  -9  -8 35.2540 302.294
  -1  10  -8-165.472 273.635
  -9  -1  -8-140.592 324.866
 -10   9   8-515.295 445.114
  10  -9  -5 965.374 303.356
 -10   9   5 712.829 271.623
  -1  10  -5 1712.81 457.392
   1 -10   5 290.783 171.724
  -9  -1  -5 422.461 284.054
  -1  10  -5 1289.83 310.181
  -9  -1  -5 724.463 322.297
   1 -10   2 32594.4 1597.78
  -1  10  -2 28103.6 943.781
   9   1   2 29303.6 1399.50
  -1  10  -2 25760.9 1330.33
   9   1   2 30448.6 998.048
  10  -9  -2 29958.1 984.332
 -10   9   2 31812.3 1626.65
  -9  -1  -2 28012.3 1491.40
  -9  -1  -2 30435.6 998.235
 -10   9   2 30966.8 1023.01
 -10   9   2 29336.1 1067.70
  10  -9  -2 30762.4 1142.97
   1 -10   2 29392.9 991.893
  -9  -1   1 3835.21 517.891
   9   1  -1 3020.95 466.128
  -1  10   1 3002.48 438.261
 -10   9  -1 3891.65 541.873
  10  -9   1 3822.90 358.326
  -1  10   1 3052.64 402.710
  10  -9   1 2366.48 395.496
  -1  10   1 2894.69 337.954
 -10   9  -1 2582.15 421.221
  -1  10   1 3576.36 474.279
  10  -9   1 2978.13 274.898
   9   1  -1 2090.50 354.638
   1 -10  -1 3408.82 455.833
  -9  -1   1 2187.64 416.047
  -1  10   1 3565.34 405.963
  10  -9   4 8688.95 682.056
  -9  -1   4 9458.08 983.586
   1 -10  -4 7111.16 761.483
  -9  -1   4 6889.24 714.591
 -10   9  -4 8231.94 914.880
   9   1  -4 7873.88 759.692
  -1  10   4 8043.65 650.338
  -1  10   4 7404.33 618.057
  10  -9   4 7579.30 735.918
   1 -10  -4 7903.65 650.828
 -10   9  -4 7389.46 662.349
  -1  10   4 8527.06 674.704
   9   1  -7 18589.8 1216.67
  -1  10   7 17381.5 1031.75
   1 -10  -7 20938.7 1601.91
  -1  10   7 14967.6 949.322
 -10   9  -7 17846.0 1539.89
 -10   9  -7 17560.6 1335.97
  10  -9   7 20115.8 1355.44
  -1  10   7 16791.7 989.175
  -9  -1   7 18856.2 1627.72
   9   1  -7 19398.4 1461.87
   1 -10  -7 18550.6 1029.23
 -10   9 -10 12121.7 1400.72
   9   1 -10 10414.5 1045.06
   9   1 -10 11106.3 1363.98
  -9  -1  10 10254.8 1383.28
   1 -10 -10 8627.99 1250.97
 -10   9 -10 12227.2 1482.07
  10  -9  10 10628.9 1130.22
  -8  -2 -12 5654.51 1281.49
  -2  10 -12 4719.13 1057.29
  -8  -2 -12 3799.57 877.399
  10  -8 -12 2909.13 851.027
  -2  10 -12 5359.13 1106.29
 -10   8  12 3361.88 852.777
  10  -8  -9 5337.88 916.462
  -2  10  -9 3843.16 723.553
  -2  10  -9 4325.56 850.627
  -8  -2  -9 5894.34 906.843
   2 -10   9 5419.10 952.475
 -10   8   9 7095.09 1068.92
  -8  -2  -9 5150.13 995.666
  -8  -2  -6 7802.43 1005.39
 -10   8   6 9166.20 1016.92
   2 -10   6 9777.76 1049.81
  -2  10  -6 9905.72 861.316
  -2  10  -6 9736.14 1044.40
  10  -8  -6 9074.39 922.932
  -8  -2  -6 8320.65 942.093
  -2  10  -3 78.6175 90.1212
  -2  10  -3 38.3979 193.658
 -10   8   3 138.356 175.484
   8   2   3-1.56960 136.158
   2 -10   3-47.3694 218.402
 -10   8   3 152.091 84.3052
  10  -8  -3 30.6106 160.312
  -8  -2  -3 172.888 60.3933
   8   2   3 155.958 58.6335
  10  -8  -3 135.242 101.816
   2 -10   3 24.0127 100.588
 -10   8   3-388.818 281.214
  -8  -2  -3 71.6435 185.258
  -2  10   0 465.162 220.081
   2 -10   0 800.386 241.450
  -2  10   0 399.035 117.337
  -2  10   0 676.712 141.068
  10  -8   0 840.856 267.885
  10  -8   0 453.956 123.886
 -10   8   0 189.865 111.232
   8   2   0 216.992 193.534
  10  -8   0 910.566 233.284
 -10   8   0 398.533 216.541
  -2  10   0 605.020 202.217
  -2  10   0 625.898 246.490
   8   2   0 498.542 195.237
  -8  -2   0 596.631 299.338
   8   2   0 226.392 149.495
  -8  -2   0 749.263 240.336
 -10   8   0 446.377 137.249
  -8  -2   3 41168.9 1878.87
  -8  -2   3 39280.1 1660.32
  10  -8   3 34476.9 1445.33
 -10   8  -3 38761.0 1563.34
 -10   8  -3 35104.9 1703.24
  10  -8   3 34356.4 1228.15
  -2  10   3 40331.8 1489.58
  -2  10   3 34139.6 1268.01
  10  -8   3 35781.4 1316.18
  -2  10   3 39577.4 1458.41
   2 -10  -3 37412.6 1318.85
   2 -10  -3 35125.6 1477.28
  -2  10   3 37700.9 1458.40
   8   2  -3 35030.7 1502.29
  -2  10   6 559.549 205.020
  -2  10   6-41.3921 170.629
   2 -10  -6 601.521 313.642
  -2  10   6 141.932 166.580
   2 -10  -6 375.495 162.545
 -10   8  -6-105.482 205.288
 -10   8  -6 159.715 181.183
   8   2  -6 239.406 204.534
  -8  -2   6 227.966 351.871
  10  -8   6 328.898 197.952
   8   2  -6 380.760 280.041
 -10   8  -9 1922.15 648.682
  10  -8   9 3542.13 631.064
  -2  10   9 2375.61 484.436
   2 -10  -9 1795.90 546.390
 -10   8  -9 1964.46 538.771
   8   2  -9 3493.31 623.054
   8   2  -9 2712.45 644.251
  -8  -2   9 1359.86 513.079
   8   2 -12 7460.98 1287.93
   2 -10 -12 10428.1 1586.69
  -8  -2  12 9368.78 1503.22
 -10   8 -12 8748.53 1394.36
  -3  10 -10 971.387 466.897
  10  -7 -10 1362.70 608.588
  -7  -3 -10 869.812 565.578
  -3  10 -10 1046.97 524.000
  -7  -3 -10 2012.52 618.091
   3 -10  10 1863.88 678.118
 -10   7  10 448.495 419.999
  -3  10  -7 34566.2 1718.85
   3 -10   7 35464.2 2078.93
  -7  -3  -7 42574.4 2361.25
  -3  10  -7 34096.9 2015.59
  10  -7  -7 39859.7 2085.49
 -10   7   7 36987.5 2142.98
  -7  -3  -7 38237.1 2011.13
   3 -10   4 15136.9 795.985
  -7  -3  -4 13151.2 1057.22
  10  -7  -4 14916.5 1000.95
  -3  10  -4 15744.3 1166.15
 -10   7   4 13945.5 545.338
   3 -10   4 14763.6 1157.35
  10  -7  -4 15099.8 575.778
 -10   7   4 15087.0 1197.30
  -3  10  -4 14540.4 794.513
 -10   7   1 200758. 3828.04
 -10   7   1 205896. 3019.98
  -3  10  -1 204149. 3766.27
  -3  10  -1 210790. 3487.04
  10  -7  -1 228674. 3996.97
  -7  -3  -1 193811. 3366.11
  -7  -3  -1 207501. 2774.86
   7   3   1 211828. 2837.41
   7   3   1 208448. 3774.33
  10  -7  -1 213305. 2809.59
  10  -7  -1 209917. 3045.88
   3 -10   1 218146. 1959.69
   3 -10   1 227072. 3888.69
   3 -10   1 224931. 3532.73
   7   3   1 212722. 3413.39
  -3  10  -1 214452. 1825.32
 -10   7   1 217527. 2861.24
  -7  -3  -1 241936. 4045.40
  -3  10   2 71155.4 1763.10
  -3  10   2 68865.0 1956.30
  -3  10   2 75114.5 1761.99
   3 -10  -2 69761.4 1771.62
 -10   7  -2 76528.2 2101.68
  10  -7   2 75470.4 1720.25
  -7  -3   2 70201.6 2229.60
   7   3  -2 68539.3 1914.66
  -7  -3   2 73089.9 2229.58
 -10   7  -2 64117.4 2159.05
 -10   7  -2 66616.0 1989.89
   7   3  -2 73889.0 2252.12
  -3  10   2 74198.7 2091.23
  -3  10   2 70815.6 1624.34
  10  -7   2 72041.3 1848.76
   7   3  -5 950.295 302.444
 -10   7  -5 1321.96 357.678
 -10   7  -5 772.714 290.919
 -10   7  -5 1481.16 323.484
  -3  10   5 1438.56 368.498
  10  -7   5 1087.80 271.860
  -7  -3   5 1350.74 383.976
  -3  10   5 970.099 217.110
   3 -10  -5 1263.12 232.197
   7   3  -5 1190.57 303.225
   3 -10  -5 1669.37 398.583
  -3  10   5 982.024 265.154
  -7  -3   8 19412.0 1691.86
 -10   7  -8 22393.1 1680.15
   3 -10  -8 21538.7 1703.07
  10  -7   8 21145.5 1312.75
   3 -10  -8 21005.4 920.433
 -10   7  -8 20772.3 1734.47
   7   3  -8 21553.7 1622.95
   7   3  -8 22033.7 1464.89
  -3  10   8 23757.0 1406.21
 -10   7 -11 3082.52 811.672
   3 -10 -11 1917.25 670.051
   7   3 -11 3924.10 774.478
   7   3 -11 4622.68 972.844
 -10   7 -11 3944.88 936.566
  -7  -3  11 2874.84 805.570
  -4  10 -11 12140.8 1459.42
  -6  -4 -11 14235.1 1766.73
  -4  10 -11 13494.8 1562.50
  -6  -4 -11 13373.8 1418.71
  10  -6 -11 14120.9 1650.53
   4 -10  11 14022.7 1589.04
 -10   6  11 13422.5 1606.13
  -6  -4  -8 653.449 411.285
 -10   6   8-89.9782 317.622
  -4  10  -8-134.777 350.924
  -6  -4  -8 155.932 300.478
  10  -6  -8-72.1175 275.745
   4 -10   8-62.2608 381.301
  -4  10  -8 60.1385 223.557
   4 -10   5 43971.9 2060.11
  -4  10  -5 45548.5 1602.35
  10  -6  -5 46798.5 1025.44
   4 -10   5 42717.0 1497.44
  10  -6  -5 44090.2 1090.64
  -4  10  -5 44683.0 2105.57
  -6  -4  -5 42218.7 1893.39
  -6  -4  -5 46595.1 2201.71
 -10   6   5 38741.4 1989.84
  10  -6  -5 44206.6 1875.53
 -10   6   2 15.3793 180.780
   6   4   2-6.46584 80.6855
 -10   6   2 109.499 129.712
  10  -6  -2 95.6525 140.981
  10  -6  -2-13.5771 83.7047
  -6  -4  -2-189.797 201.313
  -4  10  -2 138.727 170.685
  -4  10  -2-43.2590 68.3643
 -10   6   2-89.9074 99.3795
  -6  -4  -2 323.320 123.268
   4 -10   2 141.561 159.954
   4 -10   2 94.7907 73.8676
   6   4   2 61.5318 140.708
  -4  10   1 21126.8 1115.19
  -4  10   1 18291.9 682.186
  10  -6   1 19142.5 855.504
 -10   6  -1 19751.4 1070.82
  10  -6   1 15977.2 995.015
   6   4  -1 17685.5 941.045
  -4  10   1 18673.1 866.345
 -10   6  -1 19290.9 887.763
  -6  -4   1 18020.6 949.104
 -10   6  -1 19870.8 1134.32
   4 -10  -1 21307.5 1103.91
   4 -10  -1 19556.4 736.075
  -6  -4   1 17328.3 1083.36
   6   4  -1 18816.4 1065.57
  -6  -4   1 20066.4 1103.84
   6   4  -1 20095.6 1156.77
  10  -6   1 17205.9 1000.26
  -4  10   1 18479.6 924.739
 -10   6  -4 44172.4 1540.06
 -10   6  -4 39322.5 1900.96
   6   4  -4 43514.2 1705.79
  -4  10   4 41837.8 1584.50
  -4  10   4 45406.1 1725.25
   4 -10  -4 42340.5 1711.78
   6   4  -4 43414.8 1729.02
  -4  10   4 44072.2 1110.23
  -4  10   4 44717.0 1028.89
 -10   6  -4 43696.6 1754.68
  10  -6   4 45983.2 1524.62
   6   4  -7 13980.3 1141.13
   4 -10  -7 13671.0 1263.32
  -6  -4   7 11035.4 1216.28
 -10   6  -7 12328.5 1193.03
  10  -6   7 12178.2 904.305
  -4  10   7 11616.4 542.352
 -10   6  -7 13155.3 1319.97
  -4  10   7 11939.6 987.634
   6   4  -7 9677.75 1013.57
   4 -10 -10 2282.71 682.592
 -10   6 -10 1860.01 641.727
 -10   6 -10 3359.40 790.823
   6   4 -10 2459.50 591.722
   6   4 -10 2306.45 612.767
  -6  -4  10 3988.75 884.864
  -4  10  10 2660.19 575.846
  10  -5 -12 832.071 563.780
  -5  -5 -12 1098.98 627.723
  -5  10 -12 530.110 381.698
  -5  10 -12 733.981 590.166
   5 -10  12 339.363 456.421
  -5  -5  -9 6812.89 897.395
  -5  10  -9 6631.96 911.045
  -5  10  -9 4993.23 948.901
  -5  -5  -9 4464.81 918.898
   5 -10   9 5967.69 906.168
  10  -5  -9 5773.87 911.623
 -10   5   9 4534.86 837.366
  10  -5  -6 74346.7 1651.16
  -5  -5  -6 76778.0 2995.67
  10  -5  -6 81635.0 1639.03
   5 -10   6 82039.9 2895.55
  -5  -5  -6 77135.8 2611.51
  -5  10  -6 71399.0 2773.06
 -10   5   6 74537.7 2928.14
  10  -5  -6 75836.9 2696.00
  -5  10  -6 73961.7 2285.76
  -5  -5  -3 35331.8 712.961
  -5  10  -3 40880.7 1781.71
   5 -10   3 34609.6 1615.49
  10  -5  -3 35587.9 1431.26
 -10   5   3 35615.7 1723.95
  -5  -5  -3 36244.9 1620.52
  -5  -5  -3 37089.4 1704.82
   5   5   3 38479.7 771.552
  10  -5  -3 38369.5 1208.43
  -5  10  -3 39658.9 1059.72
 -10   5   3 40059.0 1221.81
   5 -10   3 39005.2 987.699
  -5  -5   0 327416. 4048.32
 -10   5   0 355502. 3846.10
   5   5   0 347060. 3998.77
  10  -5   0 322878. 3606.51
  -5  -5   0 319007. 4558.04
  10  -5   0 331558. 4504.81
  -5  10   0 341386. 4039.26
 -10   5   0 318561. 4445.03
  -5  10   0 336019. 4492.26
   5 -10   0 319818. 3791.41
   5   5   0 343575. 4152.78
 -10   5   0 355057. 4366.58
  10  -5   0 343925. 4380.39
   5   5   0 323116. 4560.90
  -5  -5   0 328741. 3972.18
   5 -10   0 384589. 4822.67
  -5  10   3 70.2861 112.270
 -10   5  -3 63.4670 260.020
  -5  -5   3 105.791 158.479
  -5  10   3-55.0313 103.507
  10  -5   3 89.2140 123.594
   5   5  -3 14.1796 165.532
  10  -5   3 57.6141 115.759
 -10   5  -3 165.125 114.627
  -5  10   3-27.1695 73.3722
   5   5  -3-20.8806 118.787
  -5  10   3 108.414 138.482
 -10   5  -3 95.3767 173.672
  -5  10   3-52.4283 77.6880
   5 -10  -3 173.497 156.616
 -10   5  -6 22323.8 1109.57
   5   5  -6 27398.6 1534.45
  10  -5   6 21616.1 1077.46
   5   5  -6 24330.7 1460.51
  -5  -5   6 21448.1 1573.55
 -10   5  -6 23502.7 1637.23
  -5  10   6 20153.4 1296.23
 -10   5  -6 22841.1 1517.72
   5 -10  -6 23522.6 1529.72
   5   5  -9 1607.10 524.074
 -10   5  -9 2108.01 679.767
  10  -5   9 1050.10 305.010
   5 -10  -9 1283.88 494.647
 -10   5  -9 393.829 312.278
  -5  -5   9 1534.89 586.394
   5   5  -9 1945.49 549.543
   5   5 -12-121.146 363.585
   5 -10 -12-75.5661 426.635
 -10   5 -12 1247.95 694.211
  -5  -5  12 1060.55 596.751
 -10   5 -12 669.441 532.409
   6 -10  10 10010.6 1208.56
  -6  10 -10 6938.31 1106.54
 -10   4  10 8613.04 1235.84
  -6  10 -10 8185.37 1107.50
  -4  -6 -10 6680.60 1141.94
  10  -4 -10 5411.87 980.300
  -4  -6 -10 8614.13 1005.69
  -6  10  -7 8601.71 883.514
   6 -10   7 8468.37 954.564
  10  -4  -7 7518.23 597.847
  -4  -6  -7 9049.61 910.245
  -6  10  -7 7424.04 987.428
  10  -4  -7 7622.16 625.391
  -4  -6  -7 9585.71 1124.69
  10  -4  -7 7910.94 943.051
 -10   4   7 7483.65 997.703
  -6  10  -4 44453.1 1961.05
 -10   4   4 50719.1 2176.70
  -6  10  -4 49476.8 1453.52
  10  -4  -4 47983.9 1437.41
 -10   4   4 46958.3 1415.01
   4   6   4 42206.3 735.446
   4   6   4 41622.9 734.916
   6 -10   4 47285.5 1343.24
  -4  -6  -4 49885.2 1919.47
  -4  -6  -4 43974.3 1971.96
  10  -4  -4 45140.9 1785.39
   6 -10   4 46887.7 1953.18
   6 -10   1 3227.48 421.598
  -6  10  -1 2893.78 430.206
   4   6   1 3766.22 486.895
  -4  -6  -1 5076.95 458.778
  -6  10  -1 3734.45 473.747
  10  -4  -1 4764.94 579.281
  -4  -6  -1 4050.92 517.011
   6 -10   1 3392.92 509.824
 -10   4   1 5261.87 508.886
 -10   4   1 3966.74 519.285
  10  -4  -1 5282.63 542.557
  10  -4  -1 3948.43 427.071
   4   6   1 4835.08 492.841
 -10   4   1 4372.11 484.499
   4   6   1 4774.99 445.035
   4   6   1 3358.83 485.495
  10  -4   2 32698.6 1406.98
  -6  10   2 32931.8 1493.96
  -4  -6   2 30109.5 1486.00
  -4  -6   2 31354.4 1209.42
  -6  10   2 31137.1 991.475
  -6  10   2 30704.1 1000.74
  -6  10   2 27672.6 1318.83
 -10   4  -2 34249.0 1581.27
 -10   4  -2 30544.5 1136.39
  -4  -6   2 31830.3 1506.56
  -6  10   2 31122.6 945.550
 -10   4  -2 31287.5 1213.15
   4   6  -2 31070.6 1206.04
  10  -4   2 26428.7 1168.90
   6 -10  -2 31599.2 1059.91
   4   6  -5 1436.25 330.901
   4   6  -5 2442.79 486.715
  -4  -6   5 2834.18 570.924
 -10   4  -5 1973.80 424.751
   6 -10  -5 2377.68 444.217
 -10   4  -5 2355.22 324.115
 -10   4  -5 2930.00 604.699
  -6  10   5 1945.11 428.954
 -10   4  -5 2184.88 310.793
   6 -10  -8 18842.0 1593.16
  10  -4   8 17884.5 966.239
   4   6  -8 17712.1 1406.24
  -6  10   8 17691.1 1357.31
 -10   4  -8 18093.7 1605.57
 -10   4  -8 15972.0 1495.60
  -4  -6   8 17204.0 1581.08
   4   6  -8 18414.3 1456.03
   6 -10 -11-217.982 347.513
 -10   4 -11 218.642 418.880
 -10   4 -11 287.555 368.199
   4   6 -11 539.648 408.747
  -4  -6  11-303.622 458.066
  -6  10  11 514.519 450.376
   4   6 -11 397.348 315.779
  10  -3 -11 1792.95 563.208
   7 -10  11 2467.76 701.294
 -10   3  11 1548.39 640.850
  -7  10 -11 1581.68 676.623
  -7  10 -11 658.445 454.297
  -3  -7 -11 1557.60 677.509
  10  -3  -8 2406.24 565.750
  -3  -7  -8 1516.16 391.749
 -10   3   8 2594.60 637.493
  -7  10  -8 2516.40 570.008
   7 -10   8 2129.27 525.342
   3   7   8 1437.42 207.257
  -3  -7  -8 732.489 466.815
  -7  10  -8 2584.81 647.390
  10  -3  -8 2108.54 382.770
   3   7   5 79453.5 1245.80
  -7  10  -5 84456.2 2217.02
   3   7   5 79092.2 1274.96
  10  -3  -5 83045.9 1940.20
  10  -3  -5 78699.5 2066.97
   7 -10   5 80380.3 2633.32
  -7  10  -5 79348.4 2883.37
   7 -10   5 76027.3 1994.01
  -3  -7  -5 78553.4 2424.06
  -3  -7  -5 89010.0 2974.20
  10  -3  -5 76583.3 2533.72
 -10   3   5 72084.2 2794.22
  -3  -7  -2 92563.2 2409.23
   7 -10   2 94637.5 2574.07
   3   7   2 93633.4 2426.20
 -10   3   2 96305.7 2216.14
   3   7   2 99285.2 2524.96
  -7  10  -2 98095.5 1244.29
   3   7   2 106341. 2410.31
  -7  10  -2 102108. 2626.71
  10  -3  -2 92544.7 2209.20
   3   7   2 102645. 1901.07
  -3  -7  -2 102795. 1862.45
   7 -10   2 98012.0 1130.05
  10  -3  -2 98630.3 2307.89
 -10   3   2 109014. 2847.06
   7 -10  -1 82435.7 1708.95
  -3  -7   1 79328.9 2208.09
  10  -3   1 77161.5 1943.01
  -3  -7   1 85027.7 1923.25
  -7  10   1 88939.6 1829.79
  -7  10   1 86429.8 2436.04
 -10   3  -1 85296.2 2392.51
 -10   3  -1 79916.5 2036.86
  -3  -7   1 81700.4 2371.41
   3   7  -1 87171.8 1922.56
  10  -3   1 86090.9 2064.78
   3   7  -1 84400.1 2281.17
 -10   3  -1 88621.4 2135.09
  10  -3   1 82313.3 2395.82
  -7  10   1 85701.0 1268.22
  -7  10   1 76013.9 2180.45
   7 -10  -1 86785.6 1359.20
 -10   3  -4 27798.6 973.997
  -3  -7   4 24215.6 1516.45
   3   7  -4 26465.3 1425.04
  -7  10   4 25926.4 1481.60
 -10   3  -4 22860.1 1453.44
 -10   3  -4 25919.5 1475.46
   3   7  -4 27128.3 1262.45
 -10   3  -4 25825.9 954.519
   7 -10  -4 27150.2 1320.01
  -7  10   7 28958.1 1712.05
   3   7  -7 25516.2 1651.44
   7 -10  -7 27095.7 1726.74
 -10   3  -7 28739.6 1892.72
 -10   3  -7 31241.7 1964.53
   3   7  -7 32887.7 1788.87
 -10   3  -7 28933.8 1083.06
  -3  -7   7 32164.8 2047.24
   3   7 -10 1700.49 559.893
  -3  -7  10 795.335 499.596
 -10   3 -10 598.243 363.093
 -10   3 -10 1588.19 644.066
   7 -10 -10 1513.86 574.191
   3   7 -10 1115.60 470.509
 -10   2  12 4677.43 1098.51
  -8  10 -12 3915.59 962.885
  -2  -8 -12 5878.60 1210.15
  -8  10 -12 4517.50 1118.72
  -2  -8  -9 4296.78 890.714
   8 -10   9 4128.63 738.784
  -8  10  -9 1964.38 546.016
  -2  -8  -9 3988.12 640.475
  10  -2  -9 2843.19 483.095
 -10   2   9 3387.38 800.623
  -8  10  -9 2986.15 703.009
  10  -2  -9 1937.66 573.597
 -10   2   6 25592.5 1772.26
  -2  -8  -6 22301.7 1288.50
  -2  -8  -6 24524.7 1668.71
   2   8   6 21220.0 802.575
   8 -10   6 22114.2 1433.91
  10  -2  -6 21019.9 1170.89
  -8  10  -6 25871.8 1738.99
   2   8   6 21519.3 828.226
  10  -2  -6 21252.6 1071.37
  10  -2  -6 17964.0 1348.97
  -8  10  -6 23561.6 1351.21
 -10   2   3 20727.6 1080.17
   2   8   3 22351.7 890.892
   2   8   3 23852.5 1229.66
  -8  10  -3 22280.8 858.720
  -8  10  -3 25067.7 1449.20
  -2  -8  -3 19361.9 1209.73
 -10   2   3 23158.6 1430.84
   8 -10   3 22555.1 808.085
  10  -2  -3 19386.7 1118.00
  10  -2  -3 24776.2 1194.64
   2   8   3 24626.3 926.452
  -2  -8  -3 22498.7 1190.63
   8 -10   3 21563.6 1256.93
  -2  -8   0 49902.3 1492.11
  10  -2   0 50541.5 1591.77
 -10   2   0 49075.4 1632.85
   8 -10   0 44252.1 735.313
  -8  10   0 35068.3 1581.60
 -10   2   0 44298.9 1579.40
   2   8   0 42324.2 1670.70
  10  -2   0 48396.6 1683.52
  -8  10   0 43740.8 1509.74
  -8  10   0 46211.0 727.056
   2   8   0 47735.3 1656.78
 -10   2   0 45852.2 1710.53
  -2  -8   0 46211.5 1599.60
   2   8   0 48773.3 1395.04
   8 -10   0 45648.1 1482.08
  10  -2   0 52280.4 1837.68
  -2  -8   0 50504.4 1835.34
  10  -2   3 107969. 2700.71
  -8  10   3 108882. 1350.52
 -10   2  -3 113314. 1876.80
   8 -10  -3 115066. 2390.64
  -8  10   3 104734. 2892.62
 -10   2  -3 118825. 3125.71
 -10   2  -3 114806. 2006.41
   2   8  -3 104462. 2747.81
  -8  10   3 109155. 1318.20
  -2  -8   3 111949. 3061.90
  -2  -8   3 117646. 2409.39
   2   8  -3 112487. 2324.76
  -8  10   3 115580. 2288.03
   8 -10  -6 6942.26 802.208
   2   8  -6 6226.64 718.282
   2   8  -6 5682.37 774.483
  -8  10   6 6890.85 838.867
 -10   2  -6 4983.84 780.590
 -10   2  -6 6612.01 418.888
  -2  -8   6 4584.05 750.975
 -10   2  -6 5749.41 402.511
 -10   2  -6 6746.01 910.379
   2   8  -9 18926.2 1574.82
 -10   2  -9 21882.3 1905.61
  -8  10   9 20966.0 1665.94
   8 -10  -9 18225.3 1651.53
 -10   2  -9 17420.9 1632.17
  -2  -8   9 22153.4 1863.66
   2   8  -9 18690.2 1594.60
   8 -10 -12 373.237 526.657
  -2  -8  12 275.754 488.236
 -10   2 -12-372.961 557.399
   2   8 -12 295.244 416.356
 -10   2 -12 815.325 638.710
  -9  10 -10 113.685 411.353
  10  -1 -10 131.234 352.207
   9 -10  10 87.2097 301.431
 -10   1  10-153.016 327.047
  -1  -9 -10 534.354 481.765
  -9  10 -10 387.451 332.292
  -1  -9  -7 12823.9 971.843
  -1  -9  -7 10782.4 1205.41
  10  -1  -7 11924.8 910.389
   1   9   7 10431.6 678.926
  -9  10  -7 13890.2 1350.43
  -9  10  -7 11698.5 1052.45
   1   9   7 12477.3 740.284
  10  -1  -7 13246.8 1220.69
   9 -10   7 11312.2 1060.19
 -10   1   7 11046.0 1248.19
 -10   1   4 6725.66 651.551
  -1  -9  -4 5896.24 723.210
   1   9   4 5725.57 488.170
   9 -10   4 5920.20 520.515
  -9  10  -4 6809.73 817.654
  -9  10  -4 6320.85 572.470
 -10   1   4 4378.50 693.338
  -1  -9  -4 5093.91 572.466
  10  -1  -4 5662.55 661.931
   1   9   4 6266.18 640.913
   9 -10   4 6405.52 720.973
   1   9   4 6828.34 528.330
  10  -1  -4 5966.08 640.360
 -10   1   1 13381.2 942.704
  -9  10  -1 10892.4 834.618
  -1  -9  -1 11058.1 850.800
   1   9   1 9554.83 793.663
  10  -1  -1 10812.8 778.180
   9 -10   1 10427.2 385.038
  -1  -9  -1 10240.1 727.286
  10  -1  -1 8783.48 781.957
   1   9   1 10101.2 738.020
   9 -10   1 11357.8 832.960
   9 -10   1 10575.1 444.913
  -9  10  -1 11060.7 917.395
   1   9   1 11794.0 723.984
  10  -1  -1 9210.87 776.256
 -10   1   1 10213.3 831.409
   1   9   1 12103.6 809.343
  -9  10   2 129841. 2135.05
 -10   1  -2 112660. 3008.19
  10  -1   2 118320. 2770.00
   9 -10  -2 125149. 2165.46
  10  -1   2 128883. 2240.29
   9 -10  -2 127767. 1938.24
  -9  10   2 133331. 3250.59
 -10   1  -2 125482. 2184.57
  -9  10   2 127478. 1993.67
   1   9  -2 136825. 3062.46
  -1  -9   2 133743. 2349.48
   1   9  -2 132725. 2275.21
  -1  -9   2 122421. 3050.15
   1   9  -5 21735.0 1200.19
 -10   1  -5 22297.8 1524.16
   1   9  -5 22486.4 1458.66
  -9  10   5 21328.2 1474.31
  -1  -9   5 22703.0 1550.77
   9 -10  -5 20814.2 1285.50
 -10   1  -5 19534.5 528.377
 -10   1  -5 22327.1 1520.23
   9 -10  -8 3748.28 732.291
   1   9  -8 4733.43 826.337
 -10   1  -8 2645.77 666.217
  -1  -9   8 5197.61 906.860
   1   9  -8 2506.09 538.939
 -10   1  -8 3501.59 763.036
  -9  10   8 3075.11 681.993
  -9  10  11 12210.3 1454.35
   9 -10 -11 13017.6 1615.85
   1   9 -11 10595.0 1385.62
 -10   1 -11 12119.1 1472.92
  -1  -9  11 12051.3 1542.67
 -10   1 -11 12553.6 1669.37
   1   9 -11 9894.15 1316.94
  10   0 -11 4050.23 893.883
 -10  10 -11 4911.29 982.150
   0 -10 -11 4492.81 1102.75
 -10  10 -11 6405.77 1181.23
 -10   0  11 5034.87 1037.09
 -10  10  -8 28044.9 1786.00
  10   0  -8 32940.7 1681.80
   0  10   8 33484.7 1406.90
   0 -10  -8 32671.2 1523.61
 -10  10  -8 31017.7 2162.14
  10   0  -8 28069.4 1949.51
  10 -10   8 30975.4 1805.34
 -10   0   8 34139.6 2294.64
   0 -10  -8 29467.9 2068.11
   0  10   5 2524.13 427.470
   0 -10  -5 2899.91 567.241
  10   0  -5 2947.00 471.491
 -10  10  -5 2651.24 429.176
  10   0  -5 2072.52 437.595
   0  10   5 2061.86 347.140
  10 -10   5 2826.12 499.092
   0  10   5 2538.39 368.361
 -10  10  -5 1634.92 431.598
 -10   0   5 2993.76 601.894
   0 -10  -5 2228.62 387.009
 -10   0   2 16066.4 1057.69
   0  10   2 18779.3 1032.56
  10 -10   2 15883.9 1074.38
   0  10   2 17279.6 971.406
   0 -10  -2 17130.0 946.063
 -10  10  -2 18830.3 1196.31
   0  10   2 17664.4 1053.05
   0  10   2 17479.5 930.402
  10 -10   2 18431.5 691.739
  10   0  -2 14710.9 960.017
   0 -10  -2 18432.4 1076.22
  10 -10   2 16362.4 708.745
 -10   0   2 17457.3 1180.05
  10 -10  -1 3347.53 312.603
   0 -10   1 3116.30 502.543
  10 -10  -1 3228.18 389.547
 -10   0  -1 3369.92 531.002
   0 -10   1 3511.29 375.960
  10   0   1 3583.10 433.635
 -10  10   1 3491.31 561.489
 -10  10   1 3272.71 393.694
  10   0   1 3066.22 436.563
   0  10  -1 3912.77 366.393
 -10   0  -1 3850.10 455.066
 -10  10   1 3162.03 313.609
   0  10  -1 3492.46 497.099
   0 -10   4 123592. 2520.08
  10 -10  -4 121963. 2785.87
 -10  10   4 135055. 3656.25
 -10   0  -4 122199. 1326.46
   0 -10   4 115201. 3386.83
   0  10  -4 126359. 3351.48
 -10   0  -4 121806. 3417.83
 -10   0  -4 121064. 1279.29
   0  10  -4 127051. 2604.86
 -10   0  -7 2769.06 659.550
 -10  10   7 2644.87 641.316
   0 -10   7 2826.97 641.468
  10 -10  -7 2542.39 569.746
 -10   0  -7 2698.81 625.102
   0  10  -7 2986.21 554.389
   0  10  -7 2234.97 537.213
 -10   0 -10 219.543 340.165
   0  10 -10 28.5743 256.102
   0 -10  10 246.727 319.848
 -10  10  10 299.757 324.925
   0  10 -10 17.5965 676.811
  10 -10 -10 143.797 372.720
 -10   0 -10 519.179 442.823
  -1  11 -12 1149.10 579.281
  -1  11 -12 1508.06 688.079
 -10  -1 -12 2072.79 758.463
  11 -10 -12 1621.05 767.965
 -11  10  12 1325.85 665.060
 -10  -1 -12 1491.82 772.954
   1 -11  12 2140.31 826.079
 -10  -1  -9 3686.73 885.856
  -1  11  -9 2263.72 576.768
  11 -10  -9 4097.81 802.802
 -10  -1  -9 3482.54 751.854
   1 -11   9 2603.22 711.393
 -11  10   9 3490.55 809.821
  -1  11  -9 2479.52 584.446
  11 -10  -6 29254.7 1681.02
 -10  -1  -6 24686.0 1696.64
  -1  11  -6 23896.1 1667.45
 -11  10   6 26393.0 1790.33
   1 -11   6 23537.8 1712.23
  -1  11  -6 23905.7 1334.40
 -10  -1  -6 24969.9 1793.32
  -1  11  -3 14656.3 1114.15
  -1  11  -3 12372.1 706.339
 -10  -1  -3 12784.5 570.307
  10   1   3 11772.1 543.002
 -11  10   3 12648.8 592.789
  11 -10  -3 14372.5 620.023
 -11  10   3 12477.2 1106.64
 -10  -1  -3 9848.08 955.167
 -11  10   3 12519.2 836.499
   1 -11   3 11564.0 1061.78
   1 -11   3 12210.7 717.264
  11 -10  -3 14453.0 906.562
  10   1   3 11629.5 965.225
  11 -10   0 9816.47 525.434
 -11  10   0 9601.38 910.467
 -11  10   0 10659.6 565.240
  10   1   0 9391.89 763.243
  -1  11   0 8315.83 729.930
  11 -10   0 10727.3 787.914
   1 -11   0 10023.0 835.578
 -10  -1   0 10174.6 905.822
 -11  10   0 10385.6 801.507
  10   1   0 10965.8 827.552
  -1  11   0 9182.81 552.437
  -1  11   0 9854.01 656.537
 -10  -1   0 10017.0 790.714
 -10  -1   3 45435.6 1866.64
   1 -11  -3 45587.0 1678.56
  -1  11   3 45257.8 1618.97
   1 -11  -3 47562.7 1843.09
  11 -10   3 46884.4 1436.66
  -1  11   3 46312.6 1628.69
 -11  10  -3 45873.7 2052.67
  10   1  -3 44523.2 1795.81
  11 -10   3 43154.5 1789.22
 -10  -1   3 47705.8 2112.52
  -1  11   3 42740.3 1624.02
  11 -10   3 45193.1 1339.99
  -1  11   6 6308.60 641.191
  10   1  -6 10228.1 1018.56
 -11  10  -6 7806.21 813.906
   1 -11  -6 6509.65 629.745
  10   1  -6 8229.48 933.439
 -11  10  -6 7244.75 952.929
  -1  11   6 8026.34 724.711
  11 -10   6 7076.98 816.784
   1 -11  -6 7224.13 916.175
 -10  -1   6 7862.80 1042.83
  -1  11   6 6978.18 656.168
 -11  10  -9 941.672 520.610
  10   1  -9 1202.84 560.601
 -11  10  -9 485.537 308.606
  10   1  -9 197.726 218.289
  11 -10   9 587.011 317.870
   1 -11  -9 1236.37 626.670
 -10  -1   9 534.885 421.749
  10   1 -12 600.696 446.761
   1 -11 -12 1639.67 774.866
 -11  10 -12 1137.40 621.763
 -11  10 -12 850.372 610.059
 -10  -1  12 2182.43 866.997
  -2  11 -10 873.526 458.831
  11  -9 -10 776.788 397.494
  -9  -2 -10 828.541 506.851
   2 -11  10 474.860 440.030
 -11   9  10-27.6494 310.354
  -9  -2 -10 1163.50 572.425
  -2  11 -10 876.929 562.703
  -2  11  -7 82999.2 2707.75
  -9  -2  -7 79208.4 3338.98
  11  -9  -7 88264.9 3146.39
 -11   9   7 90175.0 3409.02
  -9  -2  -7 88035.5 3248.47
  -2  11  -7 89526.2 3403.01
   2 -11   7 76710.2 3196.60
  -2  11  -4-11.4281 108.322
 -11   9   4 148.167 62.7364
  11  -9  -4 273.800 182.410
 -11   9   4 631.455 279.509
   2 -11   4 166.719 129.370
  -2  11  -4-131.205 210.677
   2 -11   4-57.8691 185.827
   9   2   4 598.721 249.517
  11  -9  -4 258.170 73.4922
  -9  -2  -4 203.974 294.352
   9   2   1 4090.52 514.457
  11  -9  -1 3137.64 398.789
 -11   9   1 2829.91 387.899
  11  -9  -1 3591.63 371.004
  -2  11  -1 3151.33 470.213
   2 -11   1 3454.33 534.548
 -11   9   1 2650.19 492.125
 -11   9   1 3402.33 353.042
  -9  -2  -1 3358.73 401.067
   2 -11   1 3432.05 316.210
   9   2   1 3601.92 418.913
  -2  11  -1 3115.46 285.163
  -9  -2  -1 2552.10 499.982
  -2  11   2 51060.1 1586.84
  -9  -2   2 47241.9 1881.67
  -2  11   2 46634.2 1674.57
 -11   9  -2 42091.4 1761.12
  11  -9   2 44119.1 1385.86
   2 -11  -2 43161.5 1518.55
  -2  11   2 45671.3 1513.50
  -2  11   2 45959.4 1608.45
 -11   9  -2 43757.8 1861.80
  11  -9   2 44939.4 1270.32
  -9  -2   2 49036.3 1984.01
   2 -11  -2 47843.1 1659.60
   9   2  -2 47262.5 1708.57
   9   2  -5 4050.90 618.315
   2 -11  -5 5369.46 528.221
  -9  -2   5 4885.36 779.060
  -2  11   5 4666.66 500.208
  11  -9   5 5328.62 641.213
 -11   9  -5 5252.32 785.773
  -2  11   5 4987.41 569.552
   9   2  -5 5189.71 644.138
   2 -11  -5 5326.65 701.006
  -2  11   5 5066.48 587.691
 -11   9  -5 5261.60 639.142
  -9  -2   8 2218.83 701.255
   9   2  -8 3074.08 563.800
  11  -9   8 3878.58 626.613
 -11   9  -8 3722.47 685.954
   2 -11  -8 1820.98 522.345
 -11   9  -8 3461.50 799.655
   9   2  -8 4416.53 754.980
  -2  11   8 3318.91 530.486
   2 -11  -8 3295.75 420.346
 -11   9 -11 601.558 566.551
  -9  -2  11 763.707 531.529
 -11   9 -11 522.121 569.019
   2 -11 -11 467.745 374.824
   9   2 -11-47.1068 410.526
  11  -8 -11 2.10398 372.254
  -8  -3 -11 625.769 569.400
 -11   8  11 1549.68 657.490
  -3  11 -11 992.772 537.713
  -8  -3 -11 591.741 446.932
   3 -11  11-62.2372 356.163
  -3  11 -11 886.765 466.790
  -8  -3  -8 21344.3 1873.64
  -3  11  -8 19208.8 1418.97
  -3  11  -8 21799.4 1734.27
 -11   8   8 17618.2 1586.10
  -8  -3  -8 21321.1 1625.39
  11  -8  -8 20288.0 1616.34
 -11   8   5 602.614 357.350
  -3  11  -5 532.526 208.522
  -8  -3  -5 316.349 283.484
  11  -8  -5 454.344 218.459
  -8  -3  -5 435.492 299.081
   3 -11   5 696.721 333.449
  -3  11  -5 506.774 306.974
   3 -11   2 24169.0 1396.11
 -11   8   2 21748.9 998.370
   8   3   2 22215.3 1229.19
 -11   8   2 22535.2 962.550
 -11   8   2 25434.9 1525.98
  11  -8  -2 24117.0 988.993
   3 -11   2 24353.0 772.162
  11  -8  -2 21308.1 1002.77
   8   3   2 24623.2 876.715
  -8  -3  -2 24595.7 1418.90
  -3  11  -2 26468.2 793.611
  -8  -3  -2 26943.8 902.744
  -3  11  -2 21515.7 1248.00
  -3  11   1 3834.74 352.396
 -11   8  -1 3177.69 356.493
   3 -11  -1 4130.53 528.934
 -11   8  -1 3533.76 529.298
  -3  11   1 3104.68 450.196
  -3  11   1 2975.66 396.345
  -3  11   1 4138.45 497.531
  -3  11   1 3557.45 353.642
 -11   8  -1 4178.04 527.689
  11  -8   1 3731.57 509.514
 -11   8  -1 4017.64 550.627
  11  -8   1 4346.99 391.286
   8   3  -1 3924.19 513.050
  -8  -3   1 4549.00 555.566
   8   3  -1 4543.50 524.119
  -8  -3   1 3534.00 530.724
   8   3  -4 4796.90 595.673
   3 -11  -4 4521.63 606.157
   3 -11  -4 4996.80 471.802
 -11   8  -4 5637.87 613.175
  -3  11   4 4688.86 569.043
  -3  11   4 6265.49 642.601
  11  -8   4 4187.70 527.473
 -11   8  -4 4464.15 689.324
  -8  -3   4 4090.57 659.369
   8   3  -4 5719.40 664.123
  -3  11   4 4989.15 476.662
   3 -11  -7 36645.4 2117.90
   8   3  -7 33612.8 1923.24
   3 -11  -7 36684.1 1223.55
  -8  -3   7 37960.5 2303.37
  -3  11   7 35106.9 1192.82
 -11   8  -7 35240.7 2179.88
  -3  11   7 33457.3 1598.95
  11  -8   7 36020.6 1707.67
 -11   8  -7 38020.4 2026.38
   8   3  -7 36880.4 1825.93
   8   3 -10 2806.43 610.257
 -11   8 -10 1638.95 589.669
  -8  -3  10 1392.70 542.219
   8   3 -10 1137.59 480.281
   3 -11 -10 954.056 461.639
  11  -7 -12 8361.56 1384.46
  -7  -4 -12 7980.56 1497.54
 -11   7  12 6364.88 1220.00
  -4  11 -12 7367.67 1239.40
   4 -11  12 8874.43 1348.13
  -4  11  -9 1309.66 437.613
  11  -7  -9 1664.17 517.200
 -11   7   9 2256.29 637.995
  -4  11  -9 620.636 352.332
  -7  -4  -9 2284.56 687.324
   4 -11   9 1432.27 530.881
  -7  -4  -9 2157.52 576.096
  -4  11  -6 17125.8 1085.03
   4 -11   6 22049.6 1598.60
  -7  -4  -6 19433.4 1578.86
  -4  11  -6 22486.3 1614.54
 -11   7   6 21803.8 1629.24
  11  -7  -6 17679.5 614.506
  -7  -4  -6 20217.0 1428.81
  11  -7  -6 21104.0 1430.22
   7   4   3 180908. 3620.72
  -7  -4  -3 186204. 1609.47
 -11   7   3 198928. 2643.64
   4 -11   3 200696. 2330.90
  -4  11  -3 211949. 4154.78
   7   4   3 185031. 1668.94
  11  -7  -3 196469. 2674.63
  -4  11  -3 189781. 2340.58
   4 -11   3 203112. 4152.18
 -11   7   3 182943. 4108.78
  -7  -4  -3 209142. 4104.36
  11  -7  -3 160580. 3085.10
   4 -11   0 119796. 2870.33
   4 -11   0 118627. 2487.44
  11  -7   0 120231. 2172.59
  -7  -4   0 118098. 2946.23
  -7  -4   0 115187. 2474.12
   7   4   0 115763. 2549.95
  -4  11   0 116373. 2512.66
 -11   7   0 126064. 2722.03
 -11   7   0 124951. 2981.80
  -4  11   0 121534. 1361.43
 -11   7   0 124295. 2238.01
   7   4   0 123156. 2611.61
  11  -7   0 121805. 2881.19
  11  -7   0 127838. 2729.96
  -4  11   0 121620. 1524.54
  -7  -4   3 249578. 4639.72
  -4  11   3 244412. 4052.64
   7   4  -3 248658. 3994.92
   4 -11  -3 263149. 3863.82
  11  -7   3 254903. 3849.72
  -7  -4   3 266501. 4542.65
 -11   7  -3 258751. 4016.27
  -4  11   3 257791. 4060.62
 -11   7  -3 240873. 4622.54
  -4  11   3 263137. 3213.72
  -4  11   3 266779. 3724.05
 -11   7  -3 260449. 3932.40
  -4  11   3 264905. 2994.29
  11  -7   3 258770. 3691.97
  -7  -4   6 63066.6 2770.91
   4 -11  -6 57986.4 1315.69
  11  -7   6 60390.2 2001.87
   4 -11  -6 57358.5 2426.74
  -4  11   6 59247.7 1308.01
  -4  11   6 56933.4 2117.76
 -11   7  -6 59805.2 2697.67
   7   4  -6 55355.6 2295.13
   7   4  -6 60122.8 2249.08
 -11   7  -6 57470.9 2389.47
   7   4  -9 2989.60 626.530
 -11   7  -9 4552.82 843.067
   4 -11  -9 2491.23 685.622
 -11   7  -9 4651.05 892.846
   7   4  -9 3563.69 737.502
  -4  11   9 2846.95 554.529
  -7  -4   9 2712.06 735.375
  11  -7   9 2501.72 488.527
 -11   7 -12 7227.06 1283.58
  -7  -4  12 7172.79 1283.09
 -11   7 -12 6946.59 1277.65
   4 -11 -12 10166.4 1600.18
   5 -11  10 918.430 519.348
  -5  11 -10-400.215 443.160
  11  -6 -10 673.335 470.092
 -11   6  10 75.3646 341.057
  -5  11 -10 353.681 419.577
  -6  -5 -10 756.107 523.060
  -6  -5  -7 4514.21 811.947
  -5  11  -7 4527.97 640.703
  11  -6  -7 3418.67 348.204
   5 -11   7 3627.84 692.112
  -5  11  -7 3275.13 687.304
  11  -6  -7 3072.85 640.200
 -11   6   7 2536.95 618.056
  -6  -5  -7 3508.68 605.590
  -5  11  -4 19877.8 908.473
  11  -6  -4 19413.5 1196.19
 -11   6   4 21646.0 1459.45
  11  -6  -4 18420.2 823.547
   5 -11   4 18550.7 1311.21
 -11   6   4 18200.0 809.352
  -5  11  -4 19132.8 1345.33
  -6  -5  -4 19423.4 1282.76
  -6  -5  -4 19797.6 1383.79
   5 -11   4 19359.6 845.241
   5 -11   1 105123. 2485.42
 -11   6   1 91978.2 2682.01
  -5  11  -1 93212.1 2404.36
  11  -6  -1 92445.2 2039.73
  -6  -5  -1 104390. 2069.26
   6   5   1 96609.3 2349.58
  -6  -5  -1 101943. 2707.01
  11  -6  -1 101968. 2334.15
   5 -11   1 90971.6 2545.63
 -11   6   1 99039.6 2139.67
   6   5   1 101532. 2104.62
 -11   6   1 99439.6 2284.70
  -6  -5   2 274.174 174.866
  -5  11   2 313.585 147.312
 -11   6  -2 358.936 197.788
   5 -11  -2 378.196 116.955
  11  -6   2 193.585 155.960
  -5  11   2 293.502 126.397
 -11   6  -2 229.349 169.785
  -5  11   2 331.261 238.219
  11  -6   2 526.500 195.681
 -11   6  -2 325.127 225.362
  -6  -5   2 216.469 177.860
  -5  11   2-33.2339 119.871
   6   5  -2 164.336 107.724
  -5  11   2 331.303 124.777
 -11   6  -5 10521.8 787.946
  -6  -5   5 11833.0 1150.64
   6   5  -5 11363.2 953.265
  -5  11   5 10909.8 952.813
  -5  11   5 10696.4 477.948
 -11   6  -5 11224.5 1119.25
 -11   6  -5 9719.39 933.019
   5 -11  -5 11673.0 996.924
  -5  11   5 11312.6 454.109
   6   5  -5 10451.4 928.749
   5 -11  -8 3546.90 779.131
  -5  11   8 2959.81 544.216
   6   5  -8 3775.70 737.613
 -11   6  -8 1822.87 485.662
   6   5  -8 2540.55 593.311
 -11   6  -8 3773.81 812.408
  11  -6   8 3004.48 467.424
  -6  -5   8 2446.19 672.451
 -11   6 -11-320.626 468.639
 -11   6 -11 114.390 451.134
   6   5 -11 69.7044 368.089
   5 -11 -11-460.829 376.635
   6   5 -11-344.080 465.903
  -6  -5  11 911.205 654.471
   6 -11  11 507.995 504.267
  11  -5 -11 194.372 451.069
  -6  11 -11 60.1227 357.763
  -5  -6 -11-110.215 405.133
 -11   5  11-267.165 371.103
  -6  11 -11 890.992 567.996
   6 -11   8 17218.2 1484.17
  -5  -6  -8 12282.8 1376.45
  11  -5  -8 15088.5 1378.09
  -6  11  -8 18221.5 1381.51
  11  -5  -8 13479.4 767.458
  -6  11  -8 18276.1 1635.89
  -5  -6  -8 17544.5 1367.17
 -11   5   8 17009.5 1609.94
  -5  -6  -5 918.476 314.168
  -5  -6  -5 1322.55 421.671
  11  -5  -5 1017.11 216.799
   6 -11   5 995.275 236.860
   6 -11   5 568.645 274.662
  11  -5  -5 1052.12 235.114
  -6  11  -5 1029.14 387.984
  11  -5  -5 1093.10 359.292
 -11   5   5 333.445 197.929
  -6  11  -2 5630.32 277.134
   5   6   2 6812.32 476.027
   6 -11   2 5572.39 240.699
   5   6   2 4749.90 555.026
 -11   5   2 5668.92 691.353
  -6  11  -2 6792.13 722.174
  11  -5  -2 7139.48 616.401
  -5  -6  -2 6568.39 461.843
  -5  -6  -2 7639.75 759.096
   6 -11   2 7254.03 761.719
  11  -5  -2 5477.45 557.562
 -11   5   2 6115.77 565.476
  -5  -6   1 81785.5 2476.41
   6 -11  -1 94812.5 1968.30
  -6  11   1 105762. 2767.81
  -5  -6   1 93173.8 2187.67
  11  -5   1 94012.2 2330.67
  -6  11   1 97401.3 2043.28
 -11   5  -1 102180. 2502.41
  11  -5   1 95756.8 2128.34
   5   6  -1 95522.0 2524.24
 -11   5  -1 94820.2 2153.73
 -11   5  -1 104518. 2705.19
   6 -11  -1 97388.4 1493.10
   5   6  -1 94763.9 2169.87
  -5  -6   1 100258. 2543.23
  -6  11   1 100305. 1414.15
 -11   5  -4 2323.12 343.650
  -6  11   4 2436.50 222.665
   5   6  -4 2304.31 471.891
 -11   5  -4 2526.42 373.045
  -6  11   4 1918.23 189.584
  -6  11   4 2359.90 444.995
   6 -11  -4 1741.48 371.878
 -11   5  -4 2622.72 505.814
  -5  -6   4 2019.53 468.997
   5   6  -4 1568.85 336.175
   5   6  -7 1911.73 479.549
   6 -11  -7 1549.99 490.842
  11  -5   7 2317.06 368.140
   5   6  -7 2482.53 504.269
  -6  11   7 2521.15 503.700
 -11   5  -7 2323.88 584.137
 -11   5  -7 2628.53 566.748
 -11   5  -7 2518.23 403.112
  -5  -6   7 2531.16 603.717
   5   6 -10 4726.74 917.562
  -5  -6  10 3762.57 880.484
   5   6 -10 4755.14 845.156
   6 -11 -10 6927.75 1124.72
 -11   5 -10 4648.89 971.004
 -11   5 -10 5343.32 1012.74
  -6  11  10 5897.73 874.634
  -4  -7 -12 742.472 710.319
  -7  11 -12-16.1053 421.678
 -11   4  12 29.6223 402.233
  -7  11 -12 41.5839 493.357
  -7  11  -9 6278.04 887.126
  -4  -7  -9 6345.75 1066.26
   7 -11   9 5903.20 885.206
  -4  -7  -9 4522.74 701.850
  -7  11  -9 4454.12 872.312
  11  -4  -9 3588.35 770.551
 -11   4   9 4506.15 924.368
  -4  -7  -6 3246.32 672.715
  11  -4  -6 1682.05 290.223
  11  -4  -6 2271.49 360.469
   7 -11   6 1901.12 474.365
  -7  11  -6 2124.74 552.527
  11  -4  -6 1454.59 384.828
  -4  -7  -6 1500.98 374.922
  -7  11  -6 1863.65 410.120
 -11   4   6 1162.27 413.063
 -11   4   3 1406.46 372.771
  -7  11  -3 2713.31 277.210
 -11   4   3 2540.26 362.364
   4   7   3 2328.95 265.158
  -4  -7  -3 2742.60 471.598
  -7  11  -3 2234.67 436.457
  11  -4  -3 2263.33 357.259
   7 -11   3 1969.95 426.694
   7 -11   3 2344.45 236.759
  -4  -7  -3 2168.33 246.201
  11  -4  -3 2304.71 393.388
 -11   4   0 63977.9 1817.52
  -4  -7   0 63340.2 2135.91
   4   7   0 69322.6 1968.78
  -7  11   0 65968.9 1876.75
  -4  -7   0 67463.2 1915.10
  -4  -7   0 72236.4 1936.52
   7 -11   0 66717.2 1812.37
 -11   4   0 65952.7 2085.26
  11  -4   0 65724.8 2078.54
 -11   4   0 68452.6 2103.12
  11  -4   0 62710.3 1774.74
  11  -4   0 66676.6 2066.42
   7 -11   0 70952.3 2205.31
   4   7   0 66206.5 1770.32
  -7  11   3 77611.5 1363.34
  -7  11   3 78696.0 2484.17
 -11   4  -3 78394.6 1845.95
   4   7  -3 74177.6 2330.42
 -11   4  -3 73579.5 1850.28
  -4  -7   3 74706.5 2549.80
  11  -4   3 79181.3 2260.79
   7 -11  -3 77238.3 1961.19
  -7  11   3 78271.1 1336.81
  -7  11   3 77572.2 1882.55
   4   7  -3 71696.7 1999.82
   7 -11  -6 611.551 305.360
  -4  -7   6 291.273 342.740
   4   7  -6 165.197 161.816
 -11   4  -6 299.227 218.053
   4   7  -6 137.773 229.242
 -11   4  -6 455.209 184.862
 -11   4  -6 332.506 320.722
 -11   4  -6 505.105 182.079
  -7  11   6 1053.91 382.674
   4   7  -9 494.293 368.668
 -11   4  -9-26.4657 391.798
   7 -11  -9 198.104 364.392
  -4  -7   9 643.580 385.349
  -7  11   9 354.106 264.409
   4   7  -9-234.471 376.437
 -11   4  -9 169.905 341.919
   4   7 -12-275.349 463.118
   7 -11 -12-653.545 547.370
   4   7 -12 418.968 422.981
  -4  -7  12 266.116 457.524
 -11   4 -12-247.575 514.517
 -11   4 -12-377.151 484.762
  -3  -8 -10 2245.48 521.598
  11  -3 -10 3799.53 829.772
  -8  11 -10 2195.40 626.048
  -3  -8 -10 2864.24 802.452
 -11   3  10 2408.08 715.849
   8 -11  10 2750.83 683.937
  -8  11 -10 3318.85 781.442
   3   8   7 28159.2 742.239
  -3  -8  -7 33635.2 2135.04
   8 -11   7 29075.6 1787.08
  11  -3  -7 34588.1 1415.75
  -8  11  -7 33884.7 2130.27
  -3  -8  -7 35871.0 1786.00
 -11   3   7 32996.8 2155.61
   3   8   7 29189.4 778.899
  11  -3  -7 32065.4 1457.69
  -8  11  -7 31716.5 1690.59
  11  -3  -7 38011.5 2082.58
   8 -11   4 12981.5 702.213
   3   8   4 14721.8 645.377
   3   8   4 13154.1 614.571
  -8  11  -4 16326.1 1286.53
  -3  -8  -4 16946.6 1243.30
  -3  -8  -4 16608.0 1111.35
  11  -3  -4 12336.8 857.595
 -11   3   4 15206.1 922.454
 -11   3   4 13438.4 1190.64
   8 -11   4 15305.6 1151.35
  -8  11  -4 13890.2 774.831
  11  -3  -4 15484.4 1080.41
   3   8   1 75662.7 2188.75
  11  -3  -1 79956.1 2237.30
  -3  -8  -1 81946.1 2414.45
   3   8   1 84552.7 2081.23
 -11   3   1 75920.2 2334.83
  -8  11  -1 83054.8 2284.47
   8 -11   1 76646.8 2163.96
  -3  -8  -1 83936.2 2044.27
   8 -11   1 73147.6 2323.19
   3   8   1 91783.8 2169.18
  11  -3  -1 78229.4 2071.67
 -11   3   1 78913.6 2221.99
   8 -11  -2 606427. 4693.35
  -3  -8   2 643434. 5641.20
   8 -11  -2 611908. 4279.42
   3   8  -2 676622. 6864.02
  -8  11   2 683088. 7401.94
  -8  11   2 625356. 4611.40
 -11   3  -2 677606. 5780.89
  11  -3   2 537261. 5805.71
  -3  -8   2 694725. 7373.00
   3   8  -2 681883. 5668.87
 -11   3  -2 614542. 7067.10
  -8  11   2 603403. 4429.69
  11  -3   2 633954. 5400.57
   8 -11  -5 5803.17 713.305
 -11   3  -5 6006.85 816.382
  -8  11   5 5381.87 751.471
  -3  -8   5 4723.92 759.474
 -11   3  -5 5814.00 774.154
   3   8  -5 4061.17 641.047
 -11   3  -5 5679.04 442.611
 -11   3  -5 5809.85 466.115
   3   8  -5 6218.17 678.491
  -8  11   8 1502.60 465.061
   8 -11  -8 863.202 435.565
  -3  -8   8 1065.78 448.847
   3   8  -8 2886.87 591.945
 -11   3  -8 2173.26 640.178
 -11   3  -8 1079.36 218.781
   3   8  -8 1578.28 490.089
 -11   3  -8 1741.45 570.895
   8 -11 -11 2932.55 839.879
  -3  -8  11 2689.30 806.740
   3   8 -11 2320.46 677.941
   3   8 -11 1581.22 662.443
 -11   3 -11 2307.78 803.978
 -11   3 -11 1873.18 675.330
  11  -2 -11 1589.81 628.624
  -9  11 -11 2690.44 736.068
  -2  -9 -11 2236.46 813.160
  -9  11 -11 731.757 602.076
 -11   2  11 1501.57 639.727
  -9  11  -8 3007.14 601.636
  -2  -9  -8 3110.45 683.797
 -11   2   8 3745.56 759.723
   9 -11   8 3323.18 643.009
  -9  11  -8 3492.08 781.605
  11  -2  -8 4770.30 826.558
  -2  -9  -8 4011.13 614.563
  11  -2  -8 4749.06 613.288
  -9  11  -5 2779.04 435.374
   9 -11   5 3026.23 403.241
  11  -2  -5 3788.16 475.984
 -11   2   5 2892.39 589.134
   2   9   5 3183.30 348.035
  -9  11  -5 2197.63 539.861
  -2  -9  -5 3034.30 468.122
   2   9   5 3582.12 354.605
   9 -11   5 3446.12 586.572
  11  -2  -5 3350.37 492.219
  11  -2  -5 3902.47 600.467
  -2  -9  -5 2824.67 562.364
  -2  -9  -2 1567.11 348.859
   9 -11   2 1456.09 377.662
 -11   2   2 1654.76 325.516
   9 -11   2 1788.20 176.353
  -9  11  -2 1913.13 437.071
  -2  -9  -2 2382.87 358.670
 -11   2   2 3076.54 517.214
   2   9   2 2102.28 317.649
  11  -2  -2 1281.26 284.515
  11  -2  -2 2451.09 414.113
   2   9   2 2530.07 396.418
   9 -11   2 1423.90 161.248
   9 -11  -1 23216.4 747.155
   2   9  -1 22653.2 1246.78
  -9  11   1 28334.7 1538.30
   9 -11  -1 23553.3 1008.21
  11  -2   1 24243.6 1144.82
   2   9  -1 23954.9 1022.08
  -9  11   1 24551.1 1060.76
  -2  -9   1 24528.1 1073.04
 -11   2  -1 22785.2 1112.82
  -2  -9   1 23747.4 1323.82
  11  -2   1 23540.9 1181.89
 -11   2  -1 22837.6 1333.94
  -9  11   1 24436.3 733.364
   9 -11  -4 222146. 3809.17
 -11   2  -4 224749. 2690.33
   2   9  -4 211812. 4214.04
 -11   2  -4 226327. 2572.00
  11  -2   4 228962. 4314.61
 -11   2  -4 221936. 4660.86
   2   9  -4 217025. 3559.91
  -9  11   7 89887.6 3222.96
   9 -11  -7 88635.0 3155.63
 -11   2  -7 94776.9 3552.95
 -11   2  -7 87547.9 3372.12
  -2  -9   7 86781.3 3434.85
 -11   2  -7 79702.3 1250.68
   2   9  -7 89128.5 2933.28
   9 -11 -10 1226.46 569.083
 -11   2 -10 1333.79 605.873
  -9  11  10 1710.55 610.663
  -2  -9  10 1379.72 575.537
   2   9 -10 2106.35 636.123
 -11   2 -10 1951.21 623.066
   2   9 -10 2481.17 686.489
  -1 -10 -12 450.870 640.512
 -10  11 -12-255.442 544.882
 -10  11 -12-108.986 440.549
  11  -1 -12 497.794 594.486
 -11   1  12-36.3790 440.342
 -10  11  -9 3594.43 736.814
  11  -1  -9 2684.90 504.242
  11  -1  -9 2501.37 659.431
  -1 -10  -9 3530.70 831.791
  10 -11   9 2078.03 525.378
  -1 -10  -9 2768.59 540.595
 -11   1   9 2031.85 660.757
 -10  11  -9 2576.99 660.394
 -10  11  -6 633.030 341.352
  -1 -10  -6 723.678 270.251
 -10  11  -6 165.829 183.626
  -1 -10  -6 84.5478 303.883
  11  -1  -6 213.315 186.876
  10 -11   6 413.189 307.677
   1  10   6 326.126 164.091
 -11   1   6 455.415 356.241
   1  10   6 250.026 121.679
  11  -1  -6 20.6605 224.534
 -11   1   3 4512.94 564.812
  -1 -10  -3 4848.73 575.252
  -1 -10  -3 4993.85 649.009
  10 -11   3 5051.43 404.720
 -11   1   3 4548.04 666.846
  10 -11   3 4322.07 608.090
 -10  11  -3 4919.53 683.879
  10 -11   3 4550.56 395.083
   1  10   3 5357.19 624.854
  11  -1  -3 4713.34 583.715
   1  10   3 4903.00 505.200
 -11   1   0 436.997 256.383
 -11   1   0 739.041 269.532
   1  10   0 501.761 243.026
  -1 -10   0 762.478 238.452
  11  -1   0 846.360 257.958
  -1 -10   0 240.525 144.116
  10 -11   0 646.889 208.931
 -10  11   0 216.883 140.100
  -1 -10   0 845.050 313.627
 -10  11   0 549.993 121.932
  10 -11   0 430.799 91.7170
  11  -1   0 396.618 227.772
   1  10   0 177.557 117.428
 -10  11   0 184.564 177.451
  10 -11  -3 223015. 3419.31
 -11   1  -3 226293. 2772.93
 -11   1  -3 221445. 4577.37
  -1 -10   3 220342. 3273.01
   1  10  -3 221770. 4256.96
  11  -1   3 227429. 4217.36
  -1 -10   3 216884. 4468.71
 -10  11   3 222032. 3264.41
 -10  11   3 229843. 2323.89
   1  10  -3 225248. 3278.93
  10 -11  -3 232375. 2189.89
 -11   1  -3 228178. 2667.16
  10 -11  -6 63014.1 2449.06
   1  10  -6 69852.6 2800.71
 -11   1  -6 67221.2 2881.01
 -10  11   6 56950.6 2544.86
  -1 -10   6 61052.1 2756.36
 -11   1  -6 70555.1 2876.79
   1  10  -6 70838.2 2371.17
   1  10  -9 4348.91 822.510
  10 -11  -9 2698.82 671.484
 -11   1  -9 4591.00 976.305
  -1 -10   9 4502.53 935.790
   1  10  -9 3321.50 716.756
 -11   1  -9 4992.21 883.882
   1  10 -12 3729.83 891.706
  10 -11 -12 5137.52 1104.17
 -10  11  12 5292.15 1046.17
   1  10 -12 5481.35 1076.14
  -1 -10  12 4177.73 987.288
 -11   1 -12 6006.72 1111.86
 -11   1 -12 4437.08 1093.13
 -11  11 -10 430.652 395.419
   0 -11 -10 420.834 422.939
 -11   0  10 1063.19 623.506
  11   0 -10 494.456 395.663
  11 -11  10 958.922 482.213
 -11  11 -10 768.509 500.823
  11   0  -7 2045.46 499.007
   0 -11  -7 849.558 397.509
 -11  11  -7 1800.77 437.045
   0  11   7 1153.42 260.768
   0 -11  -7 2916.91 487.265
  11   0  -7 1838.09 403.601
 -11   0   7 575.279 460.857
 -11  11  -7 1704.78 540.264
  11 -11   7 1588.33 430.426
 -11   0   4 42571.9 1815.37
   0 -11  -4 37787.1 1581.84
  11 -11   4 41194.5 1866.07
   0 -11  -4 42394.1 1965.85
 -11  11  -4 40961.8 1482.48
   0  11   4 39916.0 1492.12
 -11  11  -4 37306.4 2004.11
   0  11   4 39023.8 1625.83
 -11   0   4 40284.0 2097.83
  11 -11   4 39329.4 1377.71
   0  11   4 39405.3 1451.95
   0 -11  -1 27329.8 1326.85
   0  11   1 28562.3 1278.23
  11 -11   1 27809.8 889.884
  11   0  -1 26869.6 1342.39
 -11  11  -1 29322.7 1580.73
   0 -11  -1 31404.3 1547.96
   0  11   1 26654.6 1330.35
   0  11   1 26107.4 1091.53
  11 -11   1 27900.2 772.453
 -11   0   1 27529.3 1450.57
 -11   0   1 29037.6 1502.79
 -11  11   2 83791.9 2800.12
   0  11  -2 77742.0 2457.28
  11   0   2 76610.7 1824.88
  11 -11  -2 75682.9 1789.59
  11   0   2 72840.3 2309.00
  11 -11  -2 75141.7 1698.04
   0 -11   2 75279.1 1771.17
   0 -11   2 72422.9 2548.43
 -11  11   2 75809.6 1740.37
 -11   0  -2 64759.4 2403.43
 -11  11   2 75289.2 1725.66
   0  11  -2 73552.6 1703.37
 -11   0  -2 78207.4 1849.99
 -11  11   5 35707.9 2043.14
  11   0   5 35019.4 1859.05
 -11   0  -5 37265.9 2047.56
   0  11  -5 36648.7 1980.25
   0 -11   5 31480.5 1909.74
  11 -11  -5 33413.3 1652.38
   0  11  -5 34361.2 1495.66
   0  11  -8 393.912 278.532
 -11   0  -8 824.541 442.675
  11 -11  -8 903.675 432.658
   0  11  -8 353.830 360.713
   0 -11   8 1565.76 563.001
 -11   0  -8 490.401 379.058
 -11  11   8 412.292 256.450
   0  11 -11 2003.36 619.430
 -11  11  11 2112.18 643.383
  11 -11 -11 3984.42 970.826
 -11   0 -11 4043.59 985.174
   0  11 -11 2822.56 817.303
 -11   0 -11 3003.11 818.708
  -1  12 -10 4272.85 834.561
  12 -11 -10 5385.42 1021.48
 -11  -1 -10 3929.61 899.992
   1 -12  10 4833.65 1029.32
 -11  -1 -10 4722.35 1021.75
  -1  12 -10 4436.43 946.801
 -12  11  10 2082.38 676.796
 -12  11   7 2425.13 610.612
  -1  12  -7 1774.80 460.097
  12 -11  -7 1995.00 549.615
  -1  12  -7 2000.40 583.181
   1 -12   7 2323.06 619.245
 -11  -1  -7 832.608 480.441
 -11  -1  -7 1996.20 601.332
  -1  12  -4 1069.96 297.417
  -1  12  -4 2257.55 356.717
  12 -11  -4 1642.41 158.658
   1 -12   4 1729.91 333.239
  11   1   4 1804.10 450.076
 -11  -1  -4 1958.36 480.551
   1 -12   4 2217.59 519.637
 -12  11   4 1166.42 406.200
 -12  11   4 1543.50 159.063
  12 -11  -4 2545.19 457.253
  12 -11  -1 53720.0 1688.99
  -1  12  -1 46450.3 1862.11
 -12  11   1 44623.2 2062.98
 -12  11   1 49730.8 1320.49
  -1  12  -1 55616.1 1376.26
  11   1   1 47779.4 1840.18
 -12  11   1 50627.1 1682.49
   1 -12   1 51166.6 1402.41
  11   1   1 51521.5 1721.82
   1 -12   1 51197.1 2088.49
 -11  -1  -1 54343.8 2237.50
  12 -11  -1 50876.1 1345.83
 -11  -1  -1 51860.7 1710.29
 -11  -1   2 54094.0 2136.98
 -11  -1   2 54659.7 2201.03
  -1  12   2 58090.9 1872.85
   1 -12  -2 55071.2 2005.75
  -1  12   2 53280.3 1901.26
  12 -11   2 56166.7 1457.43
 -12  11  -2 49959.7 2102.56
   1 -12  -2 52746.9 1858.60
 -12  11  -2 55611.4 2192.57
  -1  12   2 54868.1 1710.40
  12 -11   2 54363.7 1302.20
  11   1  -2 48753.8 1855.75
 -12  11  -5 948.869 285.646
   1 -12  -5 813.939 239.370
   1 -12  -5 671.358 299.976
  11   1  -5 833.612 316.872
  -1  12   5 280.679 202.441
 -12  11  -5 287.312 289.017
  -1  12   5 236.794 157.426
  -1  12   5 880.988 271.919
  12 -11   5 402.101 275.444
  11   1  -5 405.066 260.245
 -11  -1   5 724.125 371.226
   1 -12  -8 34733.4 1529.79
  12 -11   8 35538.5 1982.54
 -12  11  -8 37080.1 2113.24
 -11  -1   8 32276.4 2329.18
  11   1  -8 34605.3 1825.93
 -12  11  -8 32998.0 2331.03
  -1  12   8 34646.8 1544.69
  11   1  -8 36871.3 2221.48
   1 -12  -8 35207.1 2301.62
   1 -12 -11 664.570 483.123
 -12  11 -11 469.517 512.706
 -12  11 -11 1069.16 653.638
  11   1 -11 439.799 552.607
 -11  -1  11 363.429 495.891
  12 -10 -11 1306.29 609.768
 -12  10  11 1015.68 648.116
 -10  -2 -11 597.680 495.480
  -2  12 -11 1870.65 608.804
   2 -12  11 1161.34 564.073
  -2  12 -11 1745.92 718.857
 -12  10   8 971.721 449.793
  12 -10  -8 101.051 271.092
  -2  12  -8 597.621 371.352
 -10  -2  -8 1398.05 513.486
   2 -12   8 616.670 322.870
  -2  12  -8 676.450 401.430
 -10  -2  -8 925.778 485.910
  -2  12  -5 5214.06 568.106
  -2  12  -5 4255.88 702.687
 -12  10   5 4155.15 711.520
 -10  -2  -5 6338.98 842.210
  10   2   5 4945.07 720.404
   2 -12   5 4297.11 734.123
  12 -10  -5 5837.91 727.602
  12 -10  -2 6254.68 530.206
 -12  10   2 5823.74 514.466
  -2  12  -2 5808.26 694.003
  10   2   2 5343.38 640.710
 -12  10   2 4855.96 488.906
 -12  10   2 5468.69 752.805
  10   2   2 5224.49 467.681
   2 -12   2 5780.70 440.241
   2 -12   2 5114.87 679.008
  -2  12  -2 6298.28 445.607
 -10  -2  -2 5364.42 725.717
 -10  -2  -2 5882.42 491.745
  12 -10  -2 5092.06 488.953
 -12  10  -1 1619.00 388.088
  -2  12   1 2327.97 307.300
   2 -12  -1 2301.75 423.678
  -2  12   1 1848.33 360.363
 -12  10  -1 1168.31 308.043
 -10  -2   1 1845.86 386.947
  10   2  -1 2447.78 439.903
  -2  12   1 2176.55 321.700
  12 -10   1 1712.03 255.877
 -10  -2   1 1907.36 426.397
 -10  -2   4 331.570 223.699
  12 -10   4-55.2607 123.770
  12 -10   4-155.611 214.150
   2 -12  -4 202.220 188.692
 -10  -2   4 405.607 328.972
  -2  12   4-12.6151 119.762
  12 -10   4 108.873 160.570
 -12  10  -4 102.608 195.228
  -2  12   4 223.916 176.519
   2 -12  -4 34.5356 141.424
  10   2  -4 207.418 195.709
  -2  12   4 142.559 173.651
   2 -12  -7 79.2580 174.339
  12 -10   7-261.149 265.611
  10   2  -7 234.332 252.148
  10   2  -7-200.068 215.940
   2 -12  -7 609.970 362.059
 -12  10  -7-38.3069 283.911
 -10  -2   7-148.993 307.839
  -2  12   7-96.8122 181.866
 -12  10  -7-42.1257 202.252
 -12  10 -10 4418.22 963.295
 -12  10 -10 6800.67 1096.37
   2 -12 -10 3031.37 839.627
  10   2 -10 5325.68 825.910
  12 -10  10 5324.05 820.354
 -10  -2  10 7126.49 1216.40
  10   2 -10 4784.57 957.442
  12  -9 -12 335.505 453.842
  -3  12 -12 186.645 432.615
  -9  -3 -12 988.678 700.176
 -12   9  12 131.356 472.426
   3 -12  12 745.375 502.669
  -3  12 -12-404.066 518.092
  -3  12  -9 253.265 253.226
 -12   9   9 47.8967 369.378
  -3  12  -9 545.625 506.777
  -9  -3  -9 128.139 346.922
  12  -9  -9 131.370 311.854
   3 -12   9-126.417 393.349
  -9  -3  -9-270.749 409.184
  -3  12  -6 2017.89 392.538
  -9  -3  -6 3035.50 692.604
  12  -9  -6 2186.69 479.488
   3 -12   6 3467.95 705.112
  -3  12  -6 3403.98 695.999
 -12   9   6 3133.30 666.179
  -9  -3  -6 2213.91 530.831
   9   3   3 9997.85 903.775
   3 -12   3 7904.75 882.761
   3 -12   3 9218.15 557.145
   9   3   3 8404.19 428.722
 -12   9   3 9115.69 974.461
  -9  -3  -3 8352.51 414.114
  -9  -3  -3 9145.04 930.179
 -12   9   3 9036.00 568.397
  -3  12  -3 8896.39 895.742
  12  -9  -3 8822.85 563.203
  12  -9  -3 9035.16 749.785
  -3  12  -3 9847.74 582.137
  12  -9   0 51586.0 1366.09
  -3  12   0 56621.6 1171.56
  -9  -3   0 58413.2 1912.25
  -3  12   0 54148.7 1299.85
   9   3   0 58565.6 1935.15
 -12   9   0 54252.8 2123.58
  -3  12   0 56236.7 1853.81
  12  -9   0 51800.8 1816.82
 -12   9   0 58365.7 1974.39
   9   3   0 54039.0 1818.44
 -12   9   0 54047.7 1463.66
  -9  -3   0 48221.8 1993.58
   3 -12   0 54886.9 2020.95
  -3  12   3 5096.21 490.395
  -9  -3   3 4030.54 607.140
  12  -9   3 5001.63 540.426
  -3  12   3 4934.50 544.075
   3 -12  -3 5169.32 583.933
  12  -9   3 4669.00 488.249
  -3  12   3 4850.04 524.314
 -12   9  -3 4213.83 599.392
 -12   9  -3 4503.67 668.560
  -3  12   3 5540.90 619.888
   9   3  -3 5103.68 598.485
  -9  -3   3 5019.24 718.105
   3 -12  -6 7259.04 584.443
 -12   9  -6 6990.97 837.919
   3 -12  -6 6936.24 886.349
  12  -9   6 7769.24 817.253
   9   3  -6 6622.02 760.233
  -3  12   6 7142.14 764.584
 -12   9  -6 5537.18 843.171
  -3  12   6 5938.67 533.880
  -9  -3   6 5456.29 874.903
   9   3  -6 6365.15 838.360
 -12   9  -9 1090.62 551.799
  12  -9   9 507.090 318.413
   3 -12  -9 1322.37 558.231
 -12   9  -9 578.437 368.170
   9   3  -9 698.237 421.695
   9   3  -9 1041.64 391.247
  -9  -3   9 1241.14 615.773
  -3  12   9 943.146 379.624
  -9  -3  12 625.899 530.361
   3 -12 -12 1106.48 610.223
   9   3 -12 312.854 565.692
 -12   9 -12 1143.20 651.299
 -12   9 -12 1161.36 667.540
  -4  12 -10 2170.46 611.946
  12  -8 -10 2567.67 772.551
 -12   8  10 2570.85 782.718
  -8  -4 -10 2418.43 639.791
  -4  12 -10 2605.67 756.920
  -8  -4 -10 2875.98 828.274
   4 -12  10 2201.10 705.749
  -8  -4  -7 26079.3 1950.99
  -4  12  -7 24343.2 1448.30
  -4  12  -7 26482.6 1868.68
   4 -12   7 22323.1 1743.73
 -12   8   7 26893.7 1907.08
  12  -8  -7 29817.3 1835.26
  -8  -4  -7 27671.6 1799.13
  -4  12  -4 5773.40 501.194
 -12   8   4 5272.33 403.320
   4 -12   4 5669.90 779.272
  -4  12  -4 4419.92 667.389
  12  -8  -4 4816.76 391.188
   4 -12   4 4491.11 426.845
 -12   8   4 4694.10 734.106
  -8  -4  -4 5794.74 750.601
  12  -8  -4 4080.73 571.321
   8   4   1 15800.2 1000.07
 -12   8   1 14558.1 890.141
 -12   8   1 16937.4 1225.24
  -8  -4  -1 13575.7 807.182
   4 -12   1 14812.1 1099.53
  -4  12  -1 15107.3 484.955
   8   4   1 15519.1 863.908
  -4  12  -1 17281.1 599.313
 -12   8   1 15833.5 852.996
  -4  12  -1 14774.6 1010.36
  -8  -4  -1 13395.8 1069.87
  12  -8  -1 15580.3 930.399
  12  -8  -1 14832.3 821.255
  -8  -4   2 20712.3 1310.28
   4 -12  -2 19572.1 970.705
  12  -8   2 19179.2 1042.53
  -4  12   2 18775.4 1168.54
  -4  12   2 21173.0 979.494
  -8  -4   2 21951.1 1332.79
   8   4  -2 20458.8 1130.98
 -12   8  -2 22492.5 1371.24
  -4  12   2 19674.0 1021.23
  12  -8   2 18431.7 915.632
 -12   8  -2 20811.8 1233.00
  -4  12   2 19870.7 923.894
   4 -12  -5 13283.9 1095.65
  12  -8   5 12403.5 925.649
 -12   8  -5 14556.4 1110.91
  -4  12   5 13078.9 658.447
  -4  12   5 14353.7 1065.13
 -12   8  -5 11815.4 1188.32
   8   4  -5 12065.7 1016.90
  -4  12   5 12417.0 696.067
   8   4  -5 13035.2 1036.09
 -12   8  -8-231.136 289.975
  -4  12   8 795.175 328.484
   4 -12  -8 328.558 270.621
 -12   8  -8 592.415 367.531
   8   4  -8 334.731 263.397
  -8  -4   8 740.398 404.089
  12  -8   8 638.133 235.043
   8   4  -8 1125.48 449.006
   8   4 -11-445.099 471.933
 -12   8 -11 58.0949 457.683
   4 -12 -11 1190.36 628.532
  -8  -4  11 569.499 548.222
   8   4 -11 591.297 421.944
  12  -7 -11 8026.59 1274.45
   5 -12  11 6360.61 1104.83
  -5  12 -11 4186.43 866.304
  -7  -5 -11 6694.05 1242.20
  -5  12 -11 6876.75 1210.41
  -7  -5 -11 6463.33 1028.19
   5 -12   8 571.081 345.920
  12  -7  -8 1570.52 519.680
 -12   7   8 1328.73 508.146
  -7  -5  -8 396.915 291.626
  -5  12  -8 895.592 319.866
  -5  12  -8 735.257 372.843
  -7  -5  -5 5062.87 713.399
   5 -12   5 4637.95 718.417
  -7  -5  -5 3735.33 667.579
 -12   7   5 4405.58 727.350
  -5  12  -5 4124.94 481.683
  12  -7  -5 4450.59 391.084
  -5  12  -5 3392.76 639.202
  12  -7  -5 5666.69 401.979
   5 -12   5 4479.99 481.763
  12  -7  -5 4407.28 638.834
  -7  -5  -2 5639.37 440.396
   7   5   2 5823.30 646.782
  -5  12  -2 3587.71 523.095
  -7  -5  -2 5267.43 693.362
   7   5   2 5579.35 455.602
   5 -12   2 4511.04 264.674
 -12   7   2 5281.12 716.467
   5 -12   2 5273.18 670.088
  12  -7  -2 4592.88 499.479
  -5  12  -2 5145.25 287.556
 -12   7   2 5004.31 504.694
  12  -7  -2 6136.75 582.159
 -12   7  -1 29785.1 1486.90
  -5  12   1 32022.8 914.754
  -5  12   1 32443.5 1360.20
   5 -12  -1 34200.8 998.965
  12  -7   1 32853.0 1502.27
  -7  -5   1 29282.1 1418.50
  -5  12   1 35653.0 1339.26
 -12   7  -1 32537.1 1529.68
  12  -7   1 33994.1 1273.20
   7   5  -1 34410.0 1426.26
 -12   7  -1 32003.1 1244.28
  -7  -5   1 33323.3 1632.65
   5 -12  -1 27302.8 1386.33
   7   5  -1 32431.5 1517.85
 -12   7  -4-91.3976 296.319
  -7  -5   4-174.848 252.207
   5 -12  -4 96.2854 176.904
  -5  12   4 184.728 85.8099
   7   5  -4-68.1736 149.311
 -12   7  -4-141.656 157.594
 -12   7  -4-132.527 182.064
  12  -7   4-11.0318 156.642
  -5  12   4 160.894 97.8525
  -5  12   4 208.026 145.109
   7   5  -4 451.428 220.454
   5 -12  -7 24507.6 1713.99
   7   5  -7 25329.9 1610.98
  -7  -5   7 20901.3 1722.40
 -12   7  -7 22045.8 1613.45
 -12   7  -7 24346.6 1831.60
  -5  12   7 22549.8 1459.67
  12  -7   7 20216.6 1173.24
   7   5  -7 23572.1 1613.20
  -7  -5  10 33.0077 359.135
  -5  12  10-159.637 318.591
   7   5 -10-190.884 329.593
 -12   7 -10-320.423 483.438
   7   5 -10-510.798 351.728
 -12   7 -10 247.015 392.022
   5 -12 -10-346.208 332.628
  -6  -6 -12-13.5716 494.495
  12  -6 -12-568.782 545.453
   6 -12  12-134.358 401.183
 -12   6  12-112.889 448.387
  -6  12 -12 65.7837 373.192
  -6  12 -12-418.634 554.043
  -6  12  -9 15521.0 1384.66
   6 -12   9 17035.2 1584.18
  -6  -6  -9 17502.3 1781.61
 -12   6   9 18359.1 1770.69
  12  -6  -9 17687.3 1667.41
  -6  -6  -9 16810.2 1447.48
   6 -12   6 6785.73 897.576
  12  -6  -6 6288.85 472.956
  -6  12  -6 6880.65 929.286
  -6  -6  -6 4701.05 686.456
  -6  -6  -6 3709.71 731.214
 -12   6   6 6934.76 964.962
  12  -6  -6 5735.48 484.806
  -6  12  -6 6365.80 680.603
  12  -6  -6 4967.90 718.003
   6 -12   3 250.978 291.660
  -6  12  -3-42.4987 64.1576
   6   6   3 20.5264 61.8754
   6 -12   3 110.162 80.2652
  -6  -6  -3 94.3629 77.3455
  -6  12  -3-176.296 220.018
  12  -6  -3 66.0517 144.542
 -12   6   3 179.312 143.300
   6   6   3 24.1249 180.714
  12  -6  -3 9.87558 208.449
  -6  -6  -3-199.740 231.699
 -12   6   3 234.552 237.622
 -12   6   0 158742. 2832.43
   6 -12   0 157286. 3464.21
 -12   6   0 181239. 3445.82
   6   6   0 165783. 3137.53
   6 -12   0 183102. 3150.34
  -6  12   0 172314. 3161.10
 -12   6   0 162915. 3506.29
  -6  -6   0 167149. 3121.49
  12  -6   0 171573. 3383.94
  -6  -6   0 184018. 3816.99
   6   6   0 188287. 3274.66
  12  -6   0 177862. 2985.55
   6 -12  -3 108257. 2419.84
   6   6  -3 116362. 2967.83
  -6  12   3 109925. 1874.19
  -6  12   3 107199. 2946.92
 -12   6  -3 102018. 2504.51
  -6  -6   3 106203. 3085.90
  12  -6   3 100280. 2474.35
 -12   6  -3 100044. 3063.60
   6   6  -3 97431.5 2498.68
  -6  12   3 105083. 1932.68
 -12   6  -3 101833. 2382.58
  -6  12   3 101974. 2243.85
   6 -12  -6 14968.6 1227.53
 -12   6  -6 11649.2 1114.40
  -6  -6   6 12622.5 1273.21
 -12   6  -6 14335.4 937.245
   6   6  -6 15431.5 1221.86
  -6  12   6 14505.0 1192.08
 -12   6  -6 13136.2 900.335
 -12   6  -6 13824.3 1347.53
   6   6  -6 13200.6 1114.19
  -6  -6   9 315.174 366.353
   6   6  -9 745.753 402.347
   6 -12  -9 421.698 370.486
  -6  12   9 1272.95 461.623
   6   6  -9 900.327 443.603
 -12   6  -9 845.273 519.133
 -12   6  -9 435.907 336.265
   6 -12 -12-380.871 498.843
  -6  -6  12 702.188 579.826
 -12   6 -12 225.404 448.237
 -12   6 -12-205.848 445.704
   6   6 -12 617.648 618.690
  -5  -7 -10 34.9904 303.735
   7 -12  10-193.398 386.633
  -7  12 -10 433.917 412.175
  -7  12 -10 579.709 406.328
  -5  -7 -10 476.101 520.720
 -12   5  10 709.477 504.866
  12  -5 -10 368.024 441.468
  -5  -7  -7 802.767 369.648
  -7  12  -7 694.541 296.879
 -12   5   7 764.401 411.794
  12  -5  -7 544.501 179.890
   7 -12   7 496.984 356.269
  -7  12  -7 582.152 425.427
  12  -5  -7 498.756 299.796
  -5  -7  -7 745.614 399.683
  12  -5  -7 977.062 279.260
  -5  -7  -4 95.6067 178.256
  -7  12  -4-70.5455 100.020
 -12   5   4 97.9573 123.347
  -5  -7  -4 201.315 174.491
 -12   5   4-55.8450 244.644
   5   7   4 35.6288 42.0070
   7 -12   4 221.695 260.927
   5   7   4 11.8051 52.3262
  -7  12  -4-29.2051 238.393
  12  -5  -4 21.4022 132.219
  12  -5  -4 91.9868 114.478
   7 -12   4-34.7639 94.1716
 -12   5   1 77873.2 2189.99
   7 -12   1 71746.0 2389.30
   5   7   1 79974.8 2023.36
  -7  12  -1 75309.2 2274.74
  12  -5  -1 78279.4 2059.81
  -5  -7  -1 79744.1 1964.14
 -12   5   1 82201.2 2578.50
  12  -5  -1 77467.1 2236.36
   5   7   1 79901.1 2148.00
  -5  -7   2 99377.1 2935.04
 -12   5  -2 103454. 2480.22
  -5  -7   2 113807. 3022.33
 -12   5  -2 105494. 3001.23
  -7  12   2 106513. 1892.42
  -7  12   2 98245.7 2837.12
   7 -12  -2 105071. 1996.73
  -7  12   2 107207. 2026.17
   5   7  -2 92441.3 2242.38
  12  -5   2 100983. 2441.09
 -12   5  -2 101073. 2336.03
  -7  12   2 110091. 2148.10
   5   7  -5 16850.2 1152.31
   7 -12  -5 17618.4 1211.81
 -12   5  -5 18611.2 1356.86
 -12   5  -5 16116.2 927.124
  -5  -7   5 15906.7 1364.63
  -7  12   5 16836.7 1269.77
   5   7  -5 20306.1 1335.18
 -12   5  -5 17088.5 944.219
 -12   5  -5 19639.5 1518.39
 -12   5  -8 3632.45 774.154
 -12   5  -8 3740.34 474.723
 -12   5  -8 3868.79 779.505
   7 -12  -8 5541.31 898.998
   5   7  -8 4063.77 729.867
  -5  -7   8 4299.25 862.959
  -7  12   8 4737.94 773.327
   5   7  -8 5861.09 870.173
   5   7 -11 347.280 382.421
 -12   5 -11 223.322 441.618
   7 -12 -11 1000.55 459.716
  -5  -7  11 972.458 665.432
 -12   5 -11-271.906 373.901
   5   7 -11-358.093 411.673
  12  -4 -11 122.519 439.922
  -8  12 -11 18.0851 363.585
  -4  -8 -11 771.694 568.129
   8 -12  11-379.066 420.160
 -12   4  11-85.1769 415.478
  -8  12 -11 817.606 637.158
 -12   4   8 6169.29 1022.86
  -8  12  -8 7652.44 908.517
  -4  -8  -8 6911.69 1117.44
   8 -12   8 8140.14 1054.12
  -8  12  -8 6934.90 1056.60
  12  -4  -8 7026.59 647.064
  -4  -8  -8 7852.53 908.326
  12  -4  -8 7183.34 1016.60
  -8  12  -5 1669.34 319.933
  -4  -8  -5 1970.49 484.421
  -4  -8  -5 1692.35 400.884
 -12   4   5 3023.82 644.522
   4   8   5 1504.97 171.733
  12  -4  -5 1521.71 340.571
  -8  12  -5 1604.89 491.225
   4   8   5 1773.38 179.235
   8 -12   5 1249.29 422.817
   8 -12   5 1754.14 306.930
  12  -4  -5 2286.52 469.628
  -4  -8  -2 20160.5 1260.17
   8 -12   2 21588.8 1350.84
   4   8   2 20528.1 1146.24
   4   8   2 23564.2 1007.35
  -4  -8  -2 24301.5 1007.91
  12  -4  -2 22933.5 1193.03
 -12   4   2 24589.1 1474.73
  -8  12  -2 23612.7 1353.24
  12  -4  -2 21629.6 1171.74
 -12   4   2 23521.2 1197.48
   8 -12  -1 12402.9 532.961
  -4  -8   1 11805.3 824.112
  -4  -8   1 12471.9 1017.99
  12  -4   1 10412.6 776.434
   8 -12  -1 11932.8 732.866
  -8  12   1 8841.88 877.251
   4   8  -1 10033.8 725.059
  12  -4   1 9741.81 782.130
 -12   4  -1 12841.3 916.972
 -12   4  -1 9614.17 870.684
  -4  -8   1 10381.5 881.350
  -8  12   1 11855.6 750.289
  -8  12   1 11687.2 474.880
   4   8  -4 4743.94 655.749
 -12   4  -4 4931.35 494.027
 -12   4  -4 4763.39 460.216
  -8  12   4 4532.69 664.311
  -4  -8   4 5056.30 752.116
   4   8  -4 4254.54 545.147
  12  -4   4 4048.40 580.010
   8 -12  -4 4999.97 585.895
 -12   4  -4 4018.12 677.576
 -12   4  -7 24955.0 1803.65
   8 -12  -7 32225.9 1910.65
 -12   4  -7 26115.7 1064.81
   4   8  -7 26884.2 1767.67
  -4  -8   7 27743.6 1991.36
 -12   4  -7 27249.6 1931.23
  -8  12   7 29462.2 1815.58
   4   8  -7 29349.3 1721.57
   4   8 -10 565.224 342.320
  -4  -8  10-197.540 539.776
   4   8 -10 593.011 395.246
 -12   4 -10 499.139 473.937
 -12   4 -10 119.249 380.734
   8 -12 -10 866.170 494.075
  12  -3 -12 3654.85 992.855
  -9  12 -12 4987.93 1019.65
 -12   3  12 4958.16 1136.31
  -9  12 -12 6633.15 1316.98
  -3  -9 -12 4065.82 1103.52
  12  -3  -9 11032.5 1324.78
 -12   3   9 12415.7 1498.28
  -9  12  -9 12439.7 1260.67
   9 -12   9 12781.1 1343.44
  -9  12  -9 9399.72 1301.43
  -3  -9  -9 12637.2 1156.34
  -3  -9  -9 12775.5 1522.22
  12  -3  -6 125.622 203.583
   9 -12   6-116.217 228.163
  12  -3  -6 69.6610 162.725
  -3  -9  -6 71.0889 330.213
 -12   3   6 311.866 342.452
   3   9   6 3.97451 63.2150
  -9  12  -6 277.054 282.575
  -3  -9  -6-72.1917 207.200
  12  -3  -6 61.7968 170.177
  -9  12  -6-95.6708 134.474
 -12   3   3 13847.4 1165.65
  -9  12  -3 14322.7 632.089
   3   9   3 14981.9 1023.55
  -9  12  -3 13600.6 1130.42
 -12   3   3 14952.9 983.631
   3   9   3 14587.9 774.893
  -3  -9  -3 14115.2 751.683
  -3  -9  -3 13539.6 1019.74
  12  -3  -3 13627.1 966.823
  12  -3  -3 13991.3 1016.89
   9 -12   3 14802.9 1143.60
   9 -12   3 14346.5 579.952
  -3  -9   0 121556. 3156.63
  -3  -9   0 137496. 2996.29
  -9  12   0 123643. 3271.44
   9 -12   0 150185. 2920.72
 -12   3   0 146206. 3304.05
   3   9   0 128616. 2897.60
  12  -3   0 132925. 3033.99
  -9  12   0 144972. 2947.57
  12  -3   0 139782. 2900.73
 -12   3   0 129274. 2977.63
  -3  -9   0 139750. 2741.02
   3   9   0 146110. 2695.86
   9 -12  -3 131869. 2596.83
   3   9  -3 146632. 3455.87
  -9  12   3 139958. 1926.50
   3   9  -3 126305. 2657.58
  -9  12   3 129577. 2440.54
 -12   3  -3 147332. 2526.34
  -9  12   3 140968. 3591.95
 -12   3  -3 136604. 2555.13
  -9  12   3 138558. 1897.84
  -3  -9   3 126438. 3463.29
  12  -3   3 147486. 3352.87
 -12   3  -3 144968. 3725.41
   9 -12  -6 4181.26 675.592
 -12   3  -6 3952.34 376.239
 -12   3  -6 4021.24 365.190
 -12   3  -6 3667.10 743.323
  -3  -9   6 4402.76 877.196
  -9  12   6 5889.13 846.412
   3   9  -6 5134.60 762.937
 -12   3  -6 4496.39 770.039
   3   9  -6 5360.48 682.937
   3   9  -9 4370.96 772.817
 -12   3  -9 4033.70 889.276
   3   9  -9 5239.47 892.836
 -12   3  -9 6873.26 1078.09
  -3  -9   9 6179.65 1066.57
  -9  12   9 5054.19 879.626
   9 -12  -9 5270.61 911.165
   3   9 -12 387.878 448.405
   9 -12 -12 1080.33 698.798
  -3  -9  12 639.185 555.719
   3   9 -12 365.505 520.613
 -12   3 -12 1261.28 711.073
 -12   3 -12 1186.50 747.251
  12  -2 -10 5696.88 1037.29
 -10  12 -10 4377.61 870.631
  10 -12  10 4265.08 813.661
 -12   2  10 7262.12 1259.12
 -10  12 -10 4621.10 1000.69
 -10  12  -7 13287.3 1104.29
  -2 -10  -7 11798.7 1297.82
  10 -12   7 13118.2 1229.45
  12  -2  -7 13293.6 958.930
  -2 -10  -7 14258.6 1099.47
 -10  12  -7 13432.3 1407.62
   2  10   7 12139.8 661.363
 -12   2   7 15536.3 1530.86
  12  -2  -7 11459.8 1181.45
  10 -12   4 265.661 229.341
  -2 -10  -4 232.193 236.363
  -2 -10  -4 172.088 207.755
 -12   2   4 356.212 180.230
 -10  12  -4 406.730 160.612
  10 -12   4 490.603 167.239
   2  10   4 266.031 143.523
   2  10   4 407.209 181.830
 -10  12  -4-31.5860 220.495
 -12   2   4 502.910 358.001
  12  -2  -4 289.836 175.152
  12  -2  -1 6942.40 683.506
 -12   2   1 7917.48 776.071
  -2 -10  -1 5264.27 659.704
 -10  12  -1 7220.76 806.158
  -2 -10  -1 6400.32 624.844
   2  10   1 7019.81 687.127
 -10  12  -1 5904.09 665.436
   2  10   1 7517.75 684.350
 -12   2   1 8252.61 819.758
   2  10   1 7809.20 654.191
  10 -12  -2 8125.94 568.470
   2  10  -2 7869.90 618.329
 -12   2  -2 7136.62 812.130
   2  10  -2 10088.2 903.523
  12  -2   2 8637.79 791.883
  10 -12  -2 8112.31 550.953
  12  -2   2 8995.79 684.516
 -10  12   2 10028.1 981.567
  -2 -10   2 7456.81 824.436
 -10  12   2 7693.21 556.334
 -12   2  -2 8275.52 662.584
  -2 -10   2 7089.02 605.574
 -10  12   2 7184.09 510.571
  10 -12  -5 24815.0 1412.49
  12  -2   5 24997.7 1561.55
   2  10  -5 27224.2 1401.67
   2  10  -5 25290.9 1613.09
 -10  12   5 23232.5 1638.82
 -12   2  -5 23188.7 807.474
  -2 -10   5 26875.8 1782.41
 -12   2  -5 23726.3 1644.77
 -12   2  -5 24622.0 787.882
 -10  12   8 1964.10 570.202
  10 -12  -8 1058.71 422.119
 -12   2  -8 1053.06 462.051
  -2 -10   8 1274.57 508.295
   2  10  -8 1833.83 572.073
 -12   2  -8 1834.85 605.034
   2  10  -8 1302.99 454.629
   2  10 -11 2493.31 753.916
  10 -12 -11 3712.53 904.469
 -12   2 -11 2490.58 799.814
 -12   2 -11 3648.61 929.966
  -2 -10  11 3043.30 863.432
   2  10 -11 2940.30 787.021
 -10  12  11 4249.04 920.843
  12  -1 -11 9604.72 1384.11
 -12   1  11 7362.65 1273.65
  -1 -11 -11 7874.86 1352.96
 -11  12 -11 9201.23 1292.25
 -11  12 -11 8324.28 1408.49
  -1 -11  -8 26769.7 1505.87
 -12   1   8 24242.5 2040.99
 -11  12  -8 27500.4 1765.63
  12  -1  -8 27043.1 1503.56
  -1 -11  -8 27844.0 2108.76
 -11  12  -8 25777.1 2037.64
  11 -12   8 22134.9 1630.06
  12  -1  -8 25884.4 1891.94
   1  11   5 1311.30 280.231
  -1 -11  -5 1073.73 320.218
 -11  12  -5 1439.55 334.855
 -12   1   5 883.973 353.020
  11 -12   5 936.475 256.875
  11 -12   5 2592.95 532.404
 -11  12  -5 2535.38 589.069
   1  11   5 1369.47 276.236
  -1 -11  -5 977.373 392.788
  12  -1  -5 1168.91 347.379
  11 -12   2 871.005 159.220
  12  -1  -2 604.703 253.883
 -12   1   2 982.982 337.255
 -12   1   2 510.960 230.390
   1  11   2 555.156 207.364
   1  11   2 494.771 191.884
  -1 -11  -2 857.995 306.588
  11 -12   2 692.317 129.634
 -11  12  -2 1669.65 427.059
  11 -12   2 954.397 320.762
  -1 -11  -2 893.570 265.936
  -1 -11   1 45573.5 1942.59
   1  11  -1 45100.4 1396.57
  12  -1   1 38832.8 1635.39
  -1 -11   1 45363.3 1496.35
   1  11  -1 47952.4 1899.23
 -11  12   1 45056.4 2073.19
  11 -12  -1 45427.1 1520.42
 -11  12   1 46680.5 1147.02
 -11  12   1 46358.9 1574.26
 -12   1  -1 46443.1 1668.98
  12  -1   1 43989.6 1637.24
 -12   1  -1 41421.4 1916.91
  11 -12  -1 48059.4 1184.54
   1  11  -4 1047.77 259.911
  11 -12  -4 589.169 258.908
 -12   1  -4 780.801 160.223
 -12   1  -4 627.075 146.731
  12  -1   4 462.047 268.751
   1  11  -4 26.7277 210.485
 -11  12   4 1082.30 395.780
  -1 -11   4 242.386 195.954
 -12   1  -4 759.733 327.594
  -1 -11   7 4921.47 881.629
   1  11  -7 5609.92 886.513
 -11  12   7 6334.31 933.264
 -12   1  -7 3596.01 777.813
  11 -12  -7 3090.23 621.870
   1  11  -7 4818.01 694.534
 -12   1  -7 4593.94 833.616
 -12   1 -10-167.897 458.508
  11 -12 -10 365.757 382.477
  -1 -11  10-130.515 464.933
   1  11 -10 171.368 317.221
 -11  12  10 52.9546 318.876
 -12   1 -10 434.104 428.681
   1  11 -10 188.857 351.341
  12   0  -9 2022.55 619.840
  12   0  -9 1054.19 361.616
   0 -12  -9 948.335 497.086
 -12  12  -9 2441.61 740.395
 -12   0   9 2474.85 780.408
  12 -12   6 10535.6 1047.80
   0 -12  -6 10673.3 1151.42
 -12  12  -6 12634.5 1031.72
   0 -12  -6 11161.5 919.987
  12   0  -6 11916.1 973.121
   0  12   6 10398.0 799.612
 -12  12  -6 13659.9 1375.67
   0  12   6 10704.9 795.422
 -12   0   6 11568.8 1294.17
  12   0  -6 11573.9 1133.71
 -12   0   3 6260.37 815.922
  12 -12   3 6464.28 512.210
  12 -12   3 6102.38 734.699
 -12  12  -3 7085.83 833.992
 -12   0   3 8658.10 868.451
  12   0  -3 5291.79 686.902
  12 -12   3 7045.84 507.100
   0 -12  -3 6240.51 700.152
   0 -12  -3 6023.66 705.441
   0  12   3 5860.96 623.488
 -12   0   0 9446.34 833.734
  12 -12   0 8789.71 476.972
 -12   0   0 9050.63 901.451
 -12  12   0 9999.50 993.011
   0 -12   0 10382.7 907.776
   0  12   0 10511.0 875.851
 -12  12   0 9534.11 516.921
   0  12   0 10512.9 781.807
 -12  12   0 10235.1 844.332
  12   0   0 10234.0 835.959
   0  12   0 10794.3 684.130
  12   0   3 2495.29 320.196
   0 -12   3 3138.67 423.411
  12 -12  -3 2891.71 430.456
   0  12  -3 2267.71 496.714
  12 -12  -3 3101.26 328.562
 -12  12   3 2632.32 306.498
   0  12  -3 4057.06 446.921
 -12  12   3 3950.96 694.848
  12   0   3 4330.50 640.599
 -12   0  -3 3541.59 647.241
 -12   0  -3 4064.39 402.151
   0 -12   3 2936.65 602.354
  12   0   6 150018. 4132.38
 -12   0  -6 137227. 4200.21
   0  12  -6 152335. 4306.96
   0  12  -6 139595. 3355.51
 -12  12   6 124383. 3989.68
   0 -12   6 125249. 4145.35
  12 -12  -6 137676. 3669.88
   0  12  -9 1047.27 460.324
  12 -12  -9 144.911 270.222
 -12  12   9 201.369 336.446
 -12   0  -9 1444.35 567.225
   0  12  -9 532.372 463.276
   0 -12   9 335.901 372.209
 -12  -1 -11 1760.95 756.617
  -1  13 -11 2473.74 750.737
  13 -12 -11 1323.59 618.280
 -13  12  11 2681.59 821.463
  -1  13 -11 1477.24 662.190
 -12  -1 -11 3832.19 946.384
  -1  13  -8 1381.89 459.537
 -13  12   8 1060.88 488.201
  13 -12  -8 647.984 330.706
  -1  13  -8 1773.21 635.995
   1 -13   8 1816.19 638.172
 -12  -1  -8 987.595 561.538
 -12  -1  -8 622.716 299.430
  13 -12  -5 37588.9 1762.67
 -12  -1  -5 47821.0 2430.37
  -1  13  -5 41046.6 2214.45
   1 -13   5 42445.0 2357.07
 -13  12   5 39746.4 2272.35
  12   1   5 41730.2 2129.00
  -1  13  -5 39213.3 1586.52
 -12  -1  -2 8847.53 664.528
   1 -13   2 8391.09 931.272
  13 -12  -2 8188.20 632.021
  -1  13  -2 8268.29 861.922
  13 -12  -2 7974.84 635.062
  12   1   2 8472.01 671.861
 -13  12   2 7636.38 634.253
   1 -13   2 6693.01 551.138
  12   1   2 7762.19 802.645
  -1  13  -2 7146.92 537.490
 -13  12   2 6173.70 839.129
 -12  -1  -2 7059.75 876.195
 -13  12   2 7132.88 583.025
 -12  -1   1 187.322 154.783
  -1  13   1 161.276 160.532
  12   1  -1 576.384 256.856
  13 -12   1 539.666 198.053
  -1  13   1 755.314 293.991
  -1  13   1 450.724 143.423
  13 -12   1 180.058 102.081
 -13  12  -1 411.671 255.193
   1 -13  -1 509.712 287.394
 -13  12  -1 145.589 186.437
 -12  -1   1 641.479 331.041
  13 -12   4 22811.3 1115.67
 -12  -1   4 21816.9 1626.38
  13 -12   4 21598.5 1404.76
   1 -13  -4 23241.6 1309.32
 -12  -1   4 25078.3 1526.61
   1 -13  -4 20398.9 1374.42
  -1  13   4 22203.0 1242.91
 -13  12  -4 20996.6 1576.58
  13 -12   4 23090.3 1083.48
  12   1  -4 22062.7 1412.63
   1 -13  -7 660.932 281.098
   1 -13  -7 21.3874 242.909
  12   1  -7 486.796 291.264
  12   1  -7 244.574 245.029
 -13  12  -7 1000.22 468.703
 -12  -1   7 682.781 368.705
  13 -12   7 615.263 335.354
  -1  13   7 1122.03 338.825
 -13  12  -7 633.868 328.598
 -13  12 -10 5015.73 1051.45
  13 -12  10 3997.08 770.076
   1 -13 -10 2964.65 813.543
  12   1 -10 6107.84 1066.24
 -12  -1  10 5393.42 1089.63
 -13  12 -10 6686.57 1074.91
  13 -11  -9 576.344 355.780
  -2  13  -9 883.476 382.434
 -13  11   9 533.429 459.371
 -11  -2  -9-131.892 342.673
  -2  13  -9 1886.69 646.557
 -11  -2  -9 1690.11 675.918
  -2  13  -6 2907.86 496.103
  -2  13  -6 3900.69 776.562
   2 -13   6 2814.96 696.317
  13 -11  -6 2207.70 492.891
 -13  11   6 4191.09 782.869
 -11  -2  -6 3943.19 746.524
  13 -11  -3 7258.76 670.379
  -2  13  -3 7086.70 823.737
 -13  11   3 7172.78 526.520
  13 -11  -3 7575.54 530.708
  11   2   3 7229.79 788.941
 -13  11   3 7504.05 951.662
   2 -13   3 4798.15 745.426
   2 -13   3 5746.56 493.913
 -11  -2  -3 7029.83 459.813
  -2  13  -3 7157.35 541.688
 -11  -2  -3 7445.16 896.570
  11   2   3 6118.47 445.956
  -2  13   0 22422.5 1263.23
 -11  -2   0 21982.7 1239.12
  -2  13   0 22542.2 1005.25
  13 -11   0 22312.7 890.492
 -13  11   0 19627.8 1366.04
 -13  11   0 21431.6 917.254
  -2  13   0 21752.0 864.952
 -13  11   0 21730.9 1259.71
  11   2   0 21857.1 1249.37
   2 -13   0 23864.5 1405.33
 -11  -2   0 19020.5 1328.58
  11   2   0 19377.9 1174.67
 -11  -2   3 25354.8 1632.94
 -11  -2   3 22459.8 1432.98
  13 -11   3 21075.6 1058.98
  -2  13   3 21704.8 1224.33
   2 -13  -3 22033.0 1278.58
  -2  13   3 22287.2 1275.70
 -13  11  -3 24928.4 1606.08
  13 -11   3 22368.4 1020.05
 -13  11  -3 21700.8 1417.50
  11   2  -3 20655.9 1300.14
   2 -13  -6 5947.28 621.583
  11   2  -6 5864.92 731.598
 -11  -2   6 6326.80 1001.27
 -13  11  -6 4796.47 668.574
 -13  11  -6 7499.89 1039.79
  13 -11   6 6671.71 810.774
  11   2  -6 5800.68 800.502
  -2  13   6 5845.89 624.860
   2 -13  -6 5585.76 820.842
 -13  11  -9 816.612 436.839
  13 -11   9 570.802 342.075
 -11  -2   9-95.4216 354.338
  11   2  -9 661.940 322.028
 -13  11  -9 430.372 445.875
  11   2  -9 204.782 345.230
  13 -10 -10 273.298 368.859
 -10  -3 -10-265.391 417.890
 -10  -3 -10 1592.58 735.870
  -3  13 -10 700.374 392.859
 -13  10  10-6.02147 321.838
  -3  13 -10 269.643 392.547
   3 -13  10 544.653 480.988
  -3  13  -7 107292. 3053.72
 -10  -3  -7 105080. 4026.42
  -3  13  -7 111779. 3972.73
 -13  10   7 105966. 3900.74
  13 -10  -7 104032. 3494.97
   3 -13   7 105653. 3901.41
 -10  -3  -7 112811. 3822.65
  -3  13  -4 6110.04 543.533
  13 -10  -4 5241.48 656.017
   3 -13   4 5144.00 778.107
   3 -13   4 5461.85 498.861
 -10  -3  -4 4246.14 694.176
  13 -10  -4 5276.53 394.056
 -13  10   4 4624.24 366.076
 -13  10   4 3656.84 664.770
  10   3   4 5632.12 751.092
  -3  13  -4 4269.46 665.729
  10   3   1 216971. 3960.11
 -10  -3  -1 241437. 3654.02
  -3  13  -1 234310. 2384.39
 -13  10   1 234366. 3274.14
  -3  13  -1 231262. 4162.74
 -13  10   1 219322. 4588.81
   3 -13   1 233196. 4476.57
  10   3   1 221920. 3525.04
 -13  10   1 238502. 3778.66
  -3  13  -1 242742. 2813.88
  13 -10  -1 233127. 3733.75
  13 -10  -1 231615. 3221.48
 -13  10  -2 6126.70 745.498
 -10  -3   2 6323.09 760.488
   3 -13  -2 5183.63 548.387
 -10  -3   2 5387.38 725.328
  -3  13   2 6124.59 573.062
  -3  13   2 6497.05 664.645
  13 -10   2 6752.29 608.410
  -3  13   2 6937.58 630.071
 -13  10  -2 5894.17 741.812
  10   3  -2 4764.95 588.626
   3 -13  -2 5174.41 605.710
  13 -10   2 5793.39 505.332
   3 -13  -5 3658.76 615.162
   3 -13  -5 4473.62 488.877
  10   3  -5 5007.10 680.404
  -3  13   5 4105.13 577.019
  13 -10   5 4457.60 621.827
 -13  10  -5 3611.45 705.385
  -3  13   5 3468.60 446.648
 -10  -3   5 3652.07 732.935
  10   3  -5 4725.06 706.289
   3 -13  -8 15861.8 1518.41
 -13  10  -8 17586.6 1510.51
 -10  -3   8 12408.2 1445.15
  10   3  -8 11636.8 1120.01
  13 -10   8 12549.2 1122.87
 -13  10  -8 15936.1 1645.63
  -3  13   8 12686.7 1049.07
  10   3  -8 12661.6 1301.00
 -10  -3  11 176.080 495.875
   3 -13 -11 488.257 505.209
 -13  10 -11 215.308 463.731
 -13  10 -11 252.974 547.871
  10   3 -11-279.105 373.334
  -4  13 -11 2030.58 658.045
  -9  -4 -11 1076.92 617.576
 -13   9  11 484.240 535.990
  -4  13 -11 1935.33 742.964
   4 -13  11 383.568 376.674
  13  -9 -11 1753.61 650.892
  -9  -4 -11 865.334 528.834
  -4  13  -8 903.744 349.625
 -13   9   8 460.965 314.501
  -9  -4  -8 1008.31 553.506
  13  -9  -8 1453.06 524.950
  -4  13  -8 1185.39 566.916
  -9  -4  -8 931.176 431.858
   4 -13   8 581.156 344.084
   4 -13   5 20190.1 1023.67
   9   4   5 25962.3 1631.44
   4 -13   5 21828.1 1619.11
  13  -9  -5 22884.8 674.642
  -4  13  -5 24337.2 1173.61
  -4  13  -5 22955.8 1623.96
  13  -9  -5 22688.6 1411.29
  13  -9  -5 21614.9 705.016
 -13   9   5 18542.6 1509.60
  -9  -4  -5 26513.7 1706.15
   9   4   2 7879.55 782.930
  -9  -4  -2 8547.73 888.883
  -4  13  -2 8303.49 852.140
   4 -13   2 8870.14 466.186
  -9  -4  -2 8316.27 579.751
   4 -13   2 10832.5 1013.98
 -13   9   2 9517.43 986.497
  13  -9  -2 8801.02 685.258
   9   4   2 8953.86 615.396
 -13   9   2 9285.87 704.721
  13  -9  -2 8443.97 682.842
  -4  13  -2 9461.65 464.702
  -9  -4   1 21219.9 1375.95
   4 -13  -1 20326.6 1255.63
  -4  13   1 21112.5 809.285
  -4  13   1 22789.1 1254.28
  -9  -4   1 20056.6 1233.76
  -4  13   1 23493.6 1167.01
  13  -9   1 21119.3 947.599
 -13   9  -1 21719.4 1362.42
  -4  13   1 22961.0 899.406
 -13   9  -1 21064.3 1003.93
 -13   9  -1 21755.8 1344.42
   9   4  -1 22453.2 1238.71
   4 -13  -4 7194.66 743.621
   9   4  -4 9564.62 879.816
  -9  -4   4 8432.96 975.913
  -4  13   4 7835.70 580.144
 -13   9  -4 7611.67 789.577
  -4  13   4 8042.83 799.525
 -13   9  -4 6595.04 864.065
  13  -9   4 7509.66 708.294
  -4  13   4 8028.72 640.346
   9   4  -7 2630.27 586.459
   4 -13  -7 3299.20 654.081
  -4  13   7 3294.39 590.844
 -13   9  -7 4047.36 713.134
  -9  -4   7 3184.45 711.956
   9   4  -7 3927.05 669.572
 -13   9  -7 4819.65 853.959
  13  -9   7 3315.79 542.970
   4 -13 -10 542.427 493.752
 -13   9 -10 233.587 378.920
 -13   9 -10 1603.98 627.158
   9   4 -10-35.8159 370.559
   9   4 -10 550.243 362.331
  -9  -4  10 658.903 515.709
  13  -8  -9 1377.94 518.051
   5 -13   9 2077.08 641.391
  -5  13  -9 2577.89 585.257
  -8  -5  -9 1071.34 499.687
 -13   8   9 346.851 360.818
  -5  13  -9 1160.91 540.064
  -8  -5  -9 1689.23 517.296
  -8  -5  -6 14255.5 1399.87
  13  -8  -6 12722.1 538.996
  -5  13  -6 15344.7 1406.08
   5 -13   6 12133.4 1229.52
  13  -8  -6 12922.6 575.299
  -8  -5  -6 16059.9 1357.49
  -5  13  -6 12895.7 950.512
 -13   8   6 13499.3 1346.51
  13  -8  -6 11729.7 1100.48
  -5  13  -3 17097.5 687.744
  -5  13  -3 17773.3 1301.82
 -13   8   3 15111.3 846.337
   5 -13   3 18066.4 1333.94
  13  -8  -3 16400.9 890.886
   8   5   3 14369.0 615.629
   8   5   3 17488.3 1191.91
  -8  -5  -3 17619.4 640.084
   5 -13   3 17861.9 674.377
  -8  -5  -3 16341.1 1262.19
  13  -8  -3 16697.3 1045.45
  -8  -5   0 14415.2 1139.10
   8   5   0 18053.1 1095.31
   5 -13   0 15714.7 1129.50
  -5  13   0 15521.7 495.567
  -5  13   0 14366.4 973.892
 -13   8   0 13655.4 1104.61
  -8  -5   0 14080.0 957.165
 -13   8   0 18102.9 1139.00
 -13   8   0 16465.0 920.682
   8   5   0 13775.1 948.238
  13  -8   0 16094.4 888.711
  -5  13   0 15560.6 537.486
  -5  13   3 422.469 233.625
  -5  13   3 243.958 177.667
 -13   8  -3 1164.71 410.936
   8   5  -3 125.483 164.679
   5 -13  -3 501.357 206.496
  -5  13   3 430.825 151.507
  -8  -5   3 702.650 319.940
 -13   8  -3 566.497 207.036
  13  -8   3 394.826 185.264
  -8  -5   3 590.100 286.082
  -5  13   3 592.120 198.277
   8   5  -6-6.69835 186.468
  -5  13   6 212.020 118.326
  -5  13   6 60.2532 86.2312
   8   5  -6 303.938 228.561
 -13   8  -6 407.003 269.281
  -5  13   6-13.1325 167.514
   5 -13  -6 172.347 259.728
 -13   8  -6-101.478 218.202
  -8  -5   6 221.464 231.778
 -13   8  -6 746.073 528.149
   5 -13  -9 7526.80 1120.90
   8   5  -9 6643.14 927.742
 -13   8  -9 7841.49 1202.40
  -5  13   9 7927.93 938.248
  -8  -5   9 9583.50 1326.64
 -13   8  -9 8187.46 1168.11
   8   5  -9 8383.88 1129.40
  13  -7 -10 1244.69 659.081
 -13   7  10 126.423 350.121
  -7  -6 -10 2019.32 816.791
  -6  13 -10 992.861 479.570
  -6  13 -10 1099.97 518.159
  -7  -6 -10 774.083 451.625
   6 -13  10 1628.80 573.024
  -6  13  -7 7976.34 830.450
  -7  -6  -7 8389.87 994.844
  -7  -6  -7 5609.56 935.646
  -6  13  -7 6359.20 973.826
  13  -7  -7 7443.33 484.043
 -13   7   7 10227.0 1238.53
   6 -13   7 8525.64 1081.82
  13  -7  -7 6058.77 884.045
 -13   7   4 280.424 247.779
  -6  13  -4 199.715 127.359
 -13   7   4 262.060 156.605
  13  -7  -4 288.075 165.573
  -7  -6  -4-54.7466 220.730
  13  -7  -4 702.187 288.426
  -6  13  -4 262.994 273.383
   7   6   4 78.9264 150.912
   6 -13   4 370.098 131.629
   6 -13   4 223.093 236.616
   6 -13   1 130715. 3366.50
 -13   7   1 125826. 2826.90
   7   6   1 117884. 2750.30
 -13   7   1 134341. 3476.21
  -7  -6  -1 125393. 2527.53
  13  -7  -1 121014. 2807.61
  -6  13  -1 118152. 2936.18
  13  -7  -1 113305. 2459.13
   7   6   1 123545. 2572.28
  -7  -6  -1 129770. 3354.26
  -6  13   2 24673.9 949.574
  -6  13   2 26821.5 1187.09
  -7  -6   2 24770.9 1496.37
   6 -13  -2 24617.5 1024.13
  -6  13   2 21688.1 1341.81
  -7  -6   2 23745.6 1410.97
 -13   7  -2 27004.6 1389.42
 -13   7  -2 24775.2 1292.77
  -6  13   2 25993.1 1103.50
 -13   7  -2 25532.3 1520.61
  13  -7   2 23895.8 1149.04
   7   6  -2 27253.0 1304.65
  -7  -6   5 2528.18 585.994
   6 -13  -5 2250.22 479.898
 -13   7  -5 2553.61 619.304
   7   6  -5 2582.80 517.975
 -13   7  -5 2538.67 419.063
  -6  13   5 2507.04 247.317
  -6  13   5 3077.49 581.317
  13  -7   5 2440.99 462.473
  -6  13   5 2111.04 245.685
 -13   7  -5 1817.14 372.264
   7   6  -5 1371.70 382.537
   7   6  -8 208.896 266.761
 -13   7  -8 176.047 286.716
   6 -13  -8 85.6799 252.897
 -13   7  -8-197.134 294.289
  -6  13   8 141.282 222.041
   7   6  -8-90.6960 303.870
  -7  -6   8 480.242 463.034
   7   6 -11 2930.87 774.474
  -7  -6  11 2761.02 875.481
   6 -13 -11 2447.39 728.381
 -13   7 -11 2835.82 835.088
 -13   7 -11 1469.98 608.285
  13  -6 -11 2249.39 733.101
   7 -13  11 1782.14 669.401
  -6  -7 -11 2249.55 802.443
  -7  13 -11 1614.76 586.565
  -7  13  -8 23470.2 1552.19
  -6  -7  -8 18078.1 1757.66
   7 -13   8 19142.6 1628.10
 -13   6   8 19917.3 1799.44
  -7  13  -8 24808.9 1999.12
  13  -6  -8 21362.9 1704.36
  -6  -7  -8 22045.8 1590.28
  -7  13  -5 9269.96 708.689
 -13   6   5 11937.8 768.354
  -6  -7  -5 10555.5 1122.99
  13  -6  -5 11087.9 1022.92
  -7  13  -5 10448.0 1118.94
   7 -13   5 10034.3 1068.49
   7 -13   5 9142.97 660.696
 -13   6   5 9244.71 1070.44
  -6  -7  -5 12175.7 1104.05
  13  -6  -5 8441.24 655.374
  -6  -7  -2 17637.5 852.195
   6   7   2 18594.3 906.005
  -7  13  -2 21790.5 1360.01
 -13   6   2 16497.7 1263.41
  13  -6  -2 16830.2 1036.04
   6   7   2 20068.1 1200.12
  13  -6  -2 18951.3 1104.27
 -13   6   2 17957.1 1043.65
   7 -13   2 19481.7 1329.64
  -6  -7  -2 16208.7 1190.33
  -6  -7   1 48479.7 2091.56
   7 -13  -1 45320.3 1058.48
 -13   6  -1 47411.4 1949.29
   7 -13  -1 48583.5 1558.88
  -7  13   1 44671.3 1977.77
  -7  13   1 48088.4 1603.87
 -13   6  -1 44000.0 1817.13
   6   7  -1 46035.4 1659.68
  13  -6   1 44574.3 1588.05
  -7  13   1 47515.5 979.007
  13  -6   4 103089. 2798.96
  -7  13   4 102715. 1621.94
  -7  13   4 99321.0 1670.49
   6   7  -4 96455.9 2902.95
  -7  13   4 91415.8 2873.92
 -13   6  -4 101804. 2502.75
  -6  -7   4 92643.1 3180.81
 -13   6  -4 93059.3 2307.87
   6   7  -4 95663.1 2652.72
 -13   6  -4 96462.3 3292.88
   7 -13  -4 101586. 2652.56
 -13   6  -7 1206.93 391.165
   7 -13  -7 1023.80 414.336
 -13   6  -7 487.717 232.030
   6   7  -7 1187.11 383.583
  -6  -7   7 1480.41 509.182
 -13   6  -7 1571.75 491.897
  -7  13   7 1466.14 432.064
   6   7  -7 1367.01 437.939
  -6  -7  10 3344.75 907.667
   7 -13 -10 4166.93 921.535
 -13   6 -10 3533.36 926.313
 -13   6 -10 2616.80 806.277
  -7  13  10 2255.82 585.478
   6   7 -10 5088.53 887.937
   6   7 -10 3071.78 728.229
  -5  -8  -9 16114.9 1773.04
   8 -13   9 16928.7 1588.60
  -8  13  -9 14018.4 1574.11
  13  -5  -9 15965.7 1578.54
  -5  -8  -9 14862.8 1362.30
  -8  13  -9 12062.0 1232.23
 -13   5   9 16257.6 1709.01
  -8  13  -6 6597.13 691.084
  -5  -8  -6 7561.15 1036.34
 -13   5   6 6790.46 1003.27
  13  -5  -6 6778.85 580.632
  13  -5  -6 6213.72 611.587
  -8  13  -6 8710.35 1101.10
   8 -13   6 6320.70 868.089
  -5  -8  -6 8132.13 905.141
  13  -5  -6 5840.54 819.459
   5   8   3 19840.4 1238.63
  -8  13  -3 18748.6 653.706
  -5  -8  -3 18919.8 806.308
  -8  13  -3 16923.8 1255.37
  13  -5  -3 16207.7 1012.60
   5   8   3 17518.2 788.190
   8 -13   3 17074.1 1273.34
 -13   5   3 17315.6 1334.31
  13  -5  -3 18234.3 1137.16
   8 -13   3 18476.3 572.377
 -13   5   3 16562.6 986.021
  -5  -8  -3 16388.6 1212.79
   5   8   0 62449.4 2065.32
   8 -13   0 65401.5 1962.13
  -5  -8   0 62194.6 2011.40
   5   8   0 70053.3 2020.21
  -8  13   0 65313.2 2032.99
 -13   5   0 57625.5 2126.85
  -5  -8   0 65072.2 2368.00
  13  -5   0 60125.2 1887.91
   8 -13   0 56154.3 2145.07
 -13   5   0 59648.8 2130.28
  -8  13   3 4657.62 407.705
   8 -13  -3 4525.69 506.716
 -13   5  -3 3763.24 471.628
   5   8  -3 5718.51 612.721
   5   8  -3 5992.65 727.691
  -8  13   3 5636.84 428.112
 -13   5  -3 5414.75 580.464
  -5  -8   3 4658.61 708.601
  -8  13   3 4825.13 692.004
  -8  13   3 4825.02 490.549
 -13   5  -3 4557.51 714.659
  13  -5   3 5973.65 676.260
  -5  -8   6 762.313 386.061
 -13   5  -6 835.881 225.543
  -8  13   6 27.5307 200.721
   5   8  -6 668.295 286.652
   5   8  -6 660.139 327.383
 -13   5  -6 1015.12 385.069
 -13   5  -6 908.145 233.508
   8 -13  -6 725.566 367.083
 -13   5  -6 198.206 297.270
   5   8  -9 6260.80 950.907
   8 -13  -9 4064.76 840.146
 -13   5  -9 4231.27 845.006
  -5  -8   9 4924.85 969.486
   5   8  -9 4296.08 793.320
  -8  13   9 3584.84 712.147
  13  -4 -10-222.684 320.468
  -9  13 -10 1077.70 519.153
 -13   4  10 439.431 525.074
  -9  13 -10-322.100 512.626
  -4  -9 -10 1196.08 625.242
   9 -13  10 28.9405 271.697
  -4  -9  -7 2299.68 533.671
  -9  13  -7 2590.20 485.785
  13  -4  -7 2681.01 659.661
  13  -4  -7 3280.80 453.574
 -13   4   7 2511.90 664.072
   9 -13   7 4197.82 737.316
  -4  -9  -7 4153.77 860.374
  -9  13  -7 3395.05 737.402
  -4  -9  -4 3739.55 640.689
  13  -4  -4 3639.23 513.164
  -9  13  -4 4669.51 438.530
  13  -4  -4 4296.92 610.669
   4   9   4 4683.26 399.467
   4   9   4 3866.71 367.617
   9 -13   4 4249.04 658.425
  -9  13  -4 4977.31 757.603
 -13   4   4 4177.19 531.344
 -13   4   4 5290.56 793.739
   9 -13   4 4419.79 398.251
  -4  -9  -4 3246.64 547.856
  -4  -9  -1 3009.20 541.554
   4   9   1 3051.19 446.407
 -13   4   1 3430.88 550.623
  -9  13  -1 2174.42 419.700
  -4  -9  -1 2413.34 389.326
   9 -13   1 2846.53 514.178
   4   9   1 1896.38 345.627
 -13   4   1 2136.69 411.985
  13  -4  -1 2219.60 399.242
  13  -4   2 22560.8 1220.85
   4   9  -2 20868.8 1079.14
   4   9  -2 23679.2 1400.76
   9 -13  -2 22551.7 938.605
  -9  13   2 22767.4 988.495
 -13   4  -2 20542.6 1135.03
  -4  -9   2 20650.0 1367.75
  13  -4   2 21653.5 1145.65
  -9  13   2 19902.6 1380.40
   9 -13  -2 22854.6 927.402
  -9  13   2 24555.4 906.375
 -13   4  -2 21745.5 1434.77
   9 -13  -5 3082.13 514.492
 -13   4  -5 3786.09 411.256
   4   9  -5 4383.66 590.356
   4   9  -5 3723.32 621.268
 -13   4  -5 4064.44 729.795
  13  -4   5 4560.76 692.832
 -13   4  -5 3999.78 439.724
  -4  -9   5 5883.84 861.003
  -9  13   5 3788.22 674.575
  -9  13   8 605.807 394.658
   9 -13  -8 115.732 318.064
  -4  -9   8 305.645 425.925
 -13   4  -8 282.579 377.529
 -13   4  -8 928.950 464.894
   4   9  -8 750.445 497.342
   4   9  -8 256.027 283.544
   9 -13 -11 328.620 401.909
 -13   4 -11 1347.61 673.545
  -4  -9  11 786.688 549.018
  -9  13  11 1156.57 540.848
   4   9 -11 1243.00 542.045
   4   9 -11 1183.55 561.893
 -13   4 -11 625.595 511.706
 -10  13 -11 790.830 475.319
  10 -13  11 1094.85 526.629
  -3 -10 -11 1555.84 784.259
 -10  13 -11 1365.21 668.725
  13  -3 -11 1009.76 564.775
  13  -3  -8 1165.50 516.913
  -3 -10  -8 247.737 241.249
 -10  13  -8 384.399 285.118
  -3 -10  -8-161.923 352.568
  10 -13   8 193.440 290.340
  13  -3  -8 839.549 314.688
 -10  13  -8 1350.68 629.045
 -13   3   8 84.2151 293.490
   3  10   5 194.484 117.884
  10 -13   5 576.051 313.764
  -3 -10  -5 542.602 261.208
 -10  13  -5 361.197 183.936
 -13   3   5 71.7627 316.296
  -3 -10  -5 676.773 352.297
   3  10   5 336.284 131.299
  10 -13   5 431.597 174.164
 -10  13  -5 43.4790 213.702
  13  -3  -5 535.118 281.821
 -13   3   5 114.266 170.466
  -3 -10  -2 15147.9 1133.06
   3  10   2 11810.7 885.802
 -10  13  -2 15420.2 1175.46
   3  10   2 11042.8 791.995
  10 -13   2 12365.0 1073.82
  -3 -10  -2 12812.0 828.401
 -13   3   2 14075.4 1157.05
  13  -3  -2 12742.9 947.043
 -13   3   2 12054.2 952.984
  -3 -10   1 109539. 3223.23
  -3 -10   1 104974. 2922.06
  10 -13  -1 109727. 2375.48
 -10  13   1 109400. 3235.88
  13  -3   1 112781. 2725.56
 -13   3  -1 116255. 3221.28
 -10  13   1 112628. 2509.40
 -13   3  -1 112730. 2742.09
  10 -13  -1 113678. 1667.80
   3  10  -1 110513. 2397.71
  13  -3   1 114791. 2781.16
 -10  13   1 112284. 1541.91
 -10  13   4 1477.66 456.479
   3  10  -4 1129.88 291.502
  13  -3   4 1020.76 333.369
 -13   3  -4 1033.81 238.177
   3  10  -4 611.987 291.883
  10 -13  -4 1302.17 333.995
  -3 -10   4 969.949 429.104
 -13   3  -4 1228.92 245.449
 -13   3  -4 1253.01 372.025
 -13   3  -7 1093.93 470.745
  10 -13  -7 358.444 317.265
  -3 -10   7 1136.23 499.064
   3  10  -7 1035.06 425.155
 -13   3  -7 596.672 372.427
 -10  13   7 843.344 400.089
   3  10  -7 363.363 245.846
 -10  13  10 7381.04 1121.74
   3  10 -10 6585.47 1036.80
  10 -13 -10 6869.18 1144.31
   3  10 -10 8021.85 1205.69
 -13   3 -10 10173.4 1378.61
  -3 -10  10 6671.96 1162.64
 -13   3 -10 8286.89 1312.30
 -13   2   9 23973.0 2133.55
 -11  13  -9 23699.9 1740.11
  -2 -11  -9 23606.2 2076.19
  11 -13   9 21357.3 1720.16
  13  -2  -9 24115.3 1452.80
 -11  13  -9 25467.9 2169.26
  -2 -11  -9 23548.0 1527.72
  13  -2  -9 26295.5 2041.05
 -11  13  -6 5458.80 658.340
  -2 -11  -6 4783.31 805.433
  13  -2  -6 5103.82 614.361
   2  11   6 5345.54 472.679
 -11  13  -6 7460.59 1042.15
 -13   2   6 6170.99 970.109
  13  -2  -6 3500.06 663.483
  11 -13   6 4380.17 734.603
   2  11   6 5545.37 484.128
  -2 -11  -6 4661.40 657.791
 -13   2   3 8449.13 834.906
  -2 -11  -3 7512.07 797.962
 -11  13  -3 5963.67 790.862
  11 -13   3 8894.95 940.266
 -13   2   3 6624.34 842.887
   2  11   3 7438.78 647.255
  -2 -11  -3 7841.58 645.868
  11 -13   3 7237.73 443.051
  11 -13   3 7643.80 450.280
   2  11   3 6784.28 704.822
  13  -2  -3 6898.91 759.776
  -2 -11   0 2961.55 438.082
  -2 -11   0 1477.03 342.987
  -2 -11   0 2663.55 519.441
 -11  13   0 2365.40 517.626
 -13   2   0 3149.94 506.504
 -11  13   0 2175.03 388.087
 -11  13   0 2433.93 206.019
 -13   2   0 2163.69 460.351
   2  11   0 2699.61 380.529
  13  -2   0 3821.57 517.419
  11 -13   0 2226.03 197.391
  11 -13  -3 2338.92 374.506
  11 -13  -3 1731.49 230.696
   2  11  -3 2674.36 532.060
 -11  13   3 2293.10 554.587
 -13   2  -3 1345.52 398.611
 -11  13   3 2425.84 288.131
 -11  13   3 2559.42 370.386
 -13   2  -3 1870.03 320.483
  13  -2   3 2791.01 524.965
   2  11  -3 1546.62 302.298
  -2 -11   3 2787.79 562.202
  11 -13  -6 11858.9 1089.17
  -2 -11   6 13343.2 1376.90
 -11  13   6 10784.4 1202.88
  13  -2   6 11875.9 1157.67
   2  11  -6 12178.3 1024.70
 -13   2  -6 12934.8 1329.65
   2  11  -6 9414.21 1090.85
  11 -13  -9 2576.92 702.913
 -11  13   9 2382.16 700.023
 -13   2  -9 2406.45 679.489
 -13   2  -9 2779.59 761.114
   2  11  -9 1855.81 654.345
  -2 -11   9 1334.09 577.643
   2  11  -9 1781.29 519.433
 -12  13 -10 632.734 394.713
  -1 -12 -10 1852.04 698.458
 -13   1  10 1418.02 659.993
  13  -1 -10 646.214 445.882
  12 -13  10 637.575 416.543
 -12  13 -10 1547.97 709.402
  12 -13   7 7153.08 951.718
 -13   1   7 9375.22 1236.85
  13  -1  -7 6246.69 880.996
 -12  13  -7 6653.59 812.768
  -1 -12  -7 8732.90 1135.41
  13  -1  -7 7495.27 784.964
  -1 -12  -7 7587.17 836.402
 -12  13  -7 6557.73 1030.51
   1  12   7 6659.52 578.697
 -13   1   4 6906.80 931.014
  -1 -12  -4 6393.16 737.181
 -13   1   4 8002.42 830.849
   1  12   4 7726.00 677.086
  12 -13   4 6718.95 548.923
  12 -13   4 5918.50 514.048
 -12  13  -4 7364.09 941.974
  12 -13   4 4833.66 725.392
  13  -1  -4 5721.55 727.469
  -1 -12  -4 5811.65 770.121
   1  12   4 6016.22 606.605
  12 -13   1 42302.2 866.308
  -1 -12  -1 38468.4 1844.13
 -12  13  -1 38372.3 1936.50
 -12  13  -1 37798.4 1750.44
  -1 -12  -1 33896.8 1564.94
   1  12   1 38986.1 1435.96
 -13   1   1 39445.7 1848.07
  12 -13   1 43058.6 987.072
  13  -1  -1 42050.5 1768.84
 -13   1   1 43102.4 1948.90
 -13   1  -2 2209.36 377.695
  12 -13  -2 1413.80 272.464
   1  12  -2 1456.30 402.385
 -12  13   2 2202.70 534.070
  13  -1   2 1560.31 319.861
  13  -1   2 1777.86 385.216
 -12  13   2 1741.65 308.980
 -12  13   2 1544.91 257.974
   1  12  -2 2089.42 327.055
  -1 -12   2 1308.70 400.791
  -1 -12   2 1576.78 311.749
 -13   1  -2 1134.41 355.489
  12 -13  -2 1433.48 261.207
  12 -13  -5 9535.57 886.718
  -1 -12   5 7482.42 1008.59
   1  12  -5 10820.1 1121.74
  13  -1   5 9153.51 1004.24
   1  12  -5 8511.47 795.413
 -12  13   5 8367.01 1066.17
 -13   1  -5 7578.40 343.320
 -13   1  -5 9318.40 1126.40
 -12  13   8 689.625 471.001
   1  12  -8 1276.68 423.585
  12 -13  -8 1235.59 511.287
 -13   1  -8 1092.02 522.583
   1  12  -8 866.349 441.494
  -1 -12   8 1041.64 541.322
 -13   1  -8 604.777 407.353
   1  12 -11 3530.77 856.998
  12 -13 -11 3099.12 860.121
 -13   1 -11 4421.55 1126.61
 -12  13  11 3632.50 928.573
   1  12 -11 3120.39 816.308
  -1 -12  11 2985.53 890.355
 -13   1 -11 2969.74 855.907
  13   0 -11 456.232 479.011
 -13  13 -11 9.70650 396.910
 -13   0  11 969.143 615.223
 -13  13 -11 575.876 649.944
   0 -13 -11-100.242 424.363
  13   0  -8 234.136 273.052
 -13  13  -8 343.280 404.171
   0 -13  -8 23.0422 365.411
  13 -13   8 1209.50 492.858
  13   0  -8-27.4300 180.912
 -13   0   8 735.094 491.617
 -13  13  -8 44.5500 336.301
   0 -13  -8-29.9871 182.793
   0  13   5 25602.2 1277.58
 -13   0   5 23717.8 1520.02
   0 -13  -5 25117.0 1673.85
 -13  13  -5 28441.6 1933.09
  13 -13   5 26666.6 1677.91
  13   0  -5 25451.4 1627.11
   0 -13  -5 26467.5 1458.25
 -13   0   5 28019.6 1953.15
   0  13   5 25311.9 1275.91
  13 -13   2 5911.48 446.896
   0 -13  -2 5362.47 704.424
 -13   0   2 6390.03 771.675
 -13  13  -2 4004.49 672.676
  13 -13   2 6489.99 421.354
 -13  13  -2 6103.93 766.255
   0  13   2 5258.01 566.587
 -13   0   2 6267.62 822.099
  13   0  -2 6025.40 704.848
   0 -13  -2 6003.16 666.587
  13   0   1 5755.98 686.149
   0 -13   1 6352.60 787.382
 -13   0  -1 6080.12 804.568
 -13  13   1 5996.62 470.080
 -13  13   1 5944.06 814.706
  13 -13  -1 5975.10 620.842
  13   0   1 5475.27 631.819
   0  13  -1 5152.49 677.421
 -13  13   1 6189.69 632.371
   0 -13   1 6206.88 577.946
   0  13  -1 6265.38 527.781
  13 -13  -1 6809.41 496.820
 -13   0  -1 6245.14 649.661
 -13  13   4 1014.21 149.905
  13 -13  -4 603.520 271.848
   0 -13   4 335.422 386.900
  13 -13  -4 436.779 98.8806
 -13   0  -4 757.796 164.860
   0  13  -4 627.282 348.351
 -13  13   4 1432.33 443.993
 -13   0  -4 384.938 291.499
   0  13  -4 898.094 239.683
 -13   0  -4 524.571 138.602
  13   0   4 570.953 299.155
   0  13  -7 1771.22 434.212
  13 -13  -7 1563.67 473.773
  13   0   7 2052.33 571.118
 -13  13   7 543.333 385.598
   0  13  -7 1171.13 494.685
   0 -13   7 1249.02 507.313
 -13   0  -7 1007.33 515.640
   0 -13  10 1806.63 650.131
   0  13 -10 1238.45 471.323
  13 -13 -10 1688.48 620.073
 -13  13  10 1653.79 615.970
 -13   0 -10 307.690 410.385
   0  13 -10 2156.40 711.064
 -13   0 -10 2339.07 750.276
  14 -13  -9 4211.92 885.251
  -1  14  -9 3425.40 681.042
   1 -14   9 3092.96 857.772
  -1  14  -9 6063.24 1095.17
 -13  -1  -9 3885.29 860.252
 -13  -1  -9 3819.90 917.573
 -14  13   9 2714.80 769.141
  -1  14  -6 1874.26 418.009
 -14  13   6 1873.18 579.255
   1 -14   6 1050.96 497.794
  -1  14  -6 958.065 458.852
  13   1   6 1724.00 513.350
  14 -13  -6 1052.62 393.473
 -13  -1  -6 751.602 438.861
 -14  13   3 670.372 399.901
  14 -13  -3 170.651 139.858
   1 -14   3 481.200 359.606
  -1  14  -3 640.317 352.458
  14 -13  -3 241.473 141.179
 -13  -1  -3 256.988 139.490
  13   1   3 271.071 140.987
 -14  13   3 228.480 134.495
  13   1   3-110.546 249.904
 -13  -1  -3 243.535 268.134
  -1  14  -3 338.624 174.214
   1 -14   3-0.54018 113.858
 -13  -1   0 1579.12 493.256
 -14  13   0 760.830 261.300
  -1  14   0 707.339 235.796
 -13  -1   0 766.396 301.784
 -14  13   0 1099.31 373.613
   1 -14   0 624.396 283.145
 -14  13   0 1307.51 229.568
  -1  14   0 991.127 223.307
  13   1   0 722.868 316.180
  14 -13   0 967.797 200.833
  -1  14   0 581.124 263.346
 -13  -1   3 70789.1 2644.69
  14 -13   3 75239.5 1872.37
 -14  13  -3 74452.8 2827.26
  -1  14   3 82178.3 2513.37
   1 -14  -3 78604.2 2605.79
  14 -13   3 79255.7 1768.32
  -1  14   3 75016.1 2266.28
 -13  -1   3 80090.5 3007.26
 -14  13  -3 77731.5 2962.74
  13   1  -3 76131.5 2594.94
   1 -14  -6 2737.60 480.864
   1 -14  -6 1832.30 531.791
  13   1  -6 2503.30 499.700
  -1  14   6 2500.92 467.984
  14 -13   6 2115.43 513.313
 -13  -1   6 2832.59 689.260
  13   1  -6 2548.16 585.809
 -14  13  -6 2153.16 625.953
 -14  13  -6 3184.17 547.905
  13   1  -9 213.781 269.085
   1 -14  -9-336.817 397.883
 -14  13  -9 206.083 363.871
 -14  13  -9-141.096 372.764
  13   1  -9 871.197 389.787
 -13  -1   9 636.640 472.821
  14 -13   9-180.730 333.892
 -12  -2 -10 2624.20 717.086
  14 -12 -10 2684.68 744.017
 -12  -2 -10 5057.70 1117.73
  -2  14 -10 3711.77 921.851
   2 -14  10 4102.46 955.557
  -2  14 -10 3962.43 821.484
 -14  12  10 3573.84 944.272
   2 -14   7 12021.8 1413.18
  14 -12  -7 14101.3 1324.21
  -2  14  -7 10889.6 1003.25
 -14  12   7 13328.8 1433.74
 -12  -2  -7 13784.0 1445.76
  -2  14  -7 13148.6 1415.39
 -12  -2  -4 11.6872 225.328
  14 -12  -4 27.8268 142.280
   2 -14   4-346.918 337.784
 -14  12   4 118.236 95.5579
   2 -14   4-33.4889 143.319
  -2  14  -4 38.8146 148.987
  -2  14  -4 191.150 261.483
  14 -12  -4 69.9492 93.5348
  12   2   4 157.800 246.504
 -12  -2  -4 126.715 62.7431
 -14  12   4 56.9652 292.927
 -12  -2  -1 8300.73 941.833
  -2  14  -1 9605.13 905.171
 -12  -2  -1 10449.6 820.784
 -14  12   1 10350.8 1090.58
  12   2   1 10251.5 907.275
  14 -12  -1 8248.36 738.677
   2 -14   1 10383.1 1011.08
  12   2   1 8304.75 753.225
 -14  12   1 10314.1 850.307
 -14  12   1 8015.60 610.015
  -2  14  -1 9496.86 565.347
  14 -12  -1 8752.18 622.866
  -2  14   2 901.102 290.439
 -12  -2   2 1298.83 378.099
  14 -12   2 1057.91 251.133
  12   2  -2 1007.17 307.968
  -2  14   2 862.323 257.066
   2 -14  -2 1211.09 359.902
  -2  14   2 1010.95 253.647
 -12  -2   2 1172.85 358.894
 -14  12  -2 1127.82 395.478
 -14  12  -2 1287.69 391.627
  14 -12   2 966.822 221.330
  -2  14   5 3735.32 548.652
   2 -14  -5 3630.14 511.915
   2 -14  -5 3537.43 609.792
  14 -12   5 3826.10 629.737
  12   2  -5 4340.97 638.911
  14 -12   5 4095.53 543.644
 -12  -2   5 4530.40 814.705
 -14  12  -5 3803.93 761.131
  12   2  -5 4891.79 746.775
  12   2  -8 17206.3 1375.44
 -14  12  -8 14964.0 1361.89
 -12  -2   8 17911.5 1787.90
   2 -14  -8 13681.6 1491.41
  14 -12   8 15774.0 1371.10
 -14  12  -8 20008.3 1874.90
  -2  14   8 14654.3 1089.86
  12   2  -8 14513.4 1449.64
  12   2 -11 726.816 506.344
   2 -14 -11 1169.17 719.167
 -14  12 -11 388.766 428.699
 -14  12 -11 42.8056 538.074
 -12  -2  11 581.589 506.865
  14 -11 -11 212.036 444.296
  -3  14 -11 253.433 401.883
 -11  -3 -11-106.783 459.247
  -3  14 -11 285.456 504.441
 -14  11  11 349.490 479.522
   3 -14  11 1195.40 661.605
 -11  -3 -11-389.051 476.005
  14 -11  -8 823.993 419.612
  -3  14  -8 256.414 206.859
 -14  11   8 123.773 388.220
 -11  -3  -8 75.2711 304.502
  -3  14  -8 12.3417 291.032
   3 -14   8 314.551 373.019
 -11  -3  -8 651.044 432.250
 -14  11   5 168.282 219.091
  -3  14  -5-105.444 168.354
  14 -11  -5-54.0744 158.652
   3 -14   5-107.047 231.128
  11   3   5 291.732 252.611
  -3  14  -5 79.6057 253.462
 -11  -3  -5 345.578 417.987
 -11  -3  -2 5358.03 792.468
 -11  -3  -2 3766.96 427.146
  -3  14  -2 3959.50 614.858
  14 -11  -2 3768.76 465.679
 -14  11   2 2721.58 567.524
  11   3   2 3314.13 427.616
   3 -14   2 4051.16 385.351
  11   3   2 3949.62 585.828
  -3  14  -2 3820.71 353.170
 -14  11   2 3616.72 451.744
  14 -11  -2 4398.00 497.185
   3 -14   2 3620.85 642.302
 -11  -3   1 43835.1 2060.88
  -3  14   1 47265.0 1475.06
   3 -14  -1 52171.4 2096.41
  -3  14   1 50273.9 1861.43
 -14  11  -1 47127.4 2158.28
  -3  14   1 48597.1 1380.21
 -14  11  -1 45411.1 1985.83
 -14  11  -1 46417.2 1461.52
  11   3  -1 48571.4 1938.72
  14 -11   1 50191.4 1436.26
 -11  -3   1 49408.3 2041.16
 -11  -3   4 12792.1 1130.02
   3 -14  -4 11838.1 1020.79
 -11  -3   4 11714.9 1197.51
  14 -11   4 12577.1 871.557
  -3  14   4 13132.6 849.251
 -14  11  -4 12820.7 1121.67
  -3  14   4 13193.2 1045.50
  11   3  -4 13978.3 1132.26
 -14  11  -4 15059.0 1336.47
  -3  14   4 11273.9 865.972
   3 -14  -7 35230.3 2162.58
   3 -14  -7 30728.7 1297.79
 -14  11  -7 30011.9 1832.59
 -11  -3   7 27635.5 2112.70
  11   3  -7 30247.3 1744.04
  14 -11   7 26351.5 1598.92
 -14  11  -7 31403.7 2218.73
  -3  14   7 27808.1 1561.34
  11   3  -7 26230.6 1828.42
 -14  11 -10 8254.56 1227.39
   3 -14 -10 4881.34 1047.64
  11   3 -10 7331.63 1009.15
 -11  -3  10 8137.21 1344.85
 -14  11 -10 9160.35 1406.60
  11   3 -10 9339.50 1287.21
  -4  14  -9 2704.80 621.420
 -10  -4  -9 1966.55 670.243
 -10  -4  -9 1874.39 589.224
  14 -10  -9 2471.43 679.424
   4 -14   9 3530.81 837.528
  -4  14  -9 3923.16 856.577
   4 -14   6 159718. 4682.80
  -4  14  -6 147150. 4448.81
 -14  10   6 130056. 4283.26
 -10  -4  -6 164798. 4481.43
  -4  14  -6 151454. 3259.13
  14 -10  -6 144157. 3887.19
  14 -10  -3 50.1587 124.173
 -10  -4  -3-68.3457 220.255
  10   4   3 29.0117 96.2213
 -10  -4  -3 49.1410 77.3404
  -4  14  -3 204.701 169.149
   4 -14   3 54.3029 181.001
  14 -10  -3-131.607 154.395
 -14  10   3 163.980 239.324
  10   4   3 82.1202 141.488
   4 -14   3-29.4234 87.6840
 -14  10   3-160.444 173.481
  -4  14  -3 18.3793 78.9962
 -10  -4   0 427.943 285.896
  -4  14   0 504.265 146.907
  -4  14   0 439.008 123.234
 -14  10   0 443.867 248.836
  -4  14   0 293.421 178.581
  14 -10   0 386.918 159.698
 -14  10   0 269.545 219.102
 -10  -4   0 529.103 217.667
 -14  10   0 379.839 195.846
  10   4   0 437.114 200.879
   4 -14   0 444.567 287.481
  14 -10   3 63044.5 1868.17
 -10  -4   3 64707.4 2533.84
  14 -10   3 59498.3 1972.82
 -10  -4   3 58999.6 2491.62
  -4  14   3 62415.0 1807.79
 -14  10  -3 62987.1 2361.80
 -14  10  -3 58916.7 2519.09
  -4  14   3 62846.7 2281.86
   4 -14  -3 62634.4 2067.53
  10   4  -3 68471.4 2343.66
  -4  14   3 62756.9 1992.05
 -14  10  -6 948.945 358.927
 -10  -4   6 1404.16 549.636
   4 -14  -6 2197.98 528.719
  -4  14   6 1466.59 262.860
  10   4  -6 2787.01 568.353
 -14  10  -6 2078.30 559.798
  -4  14   6 2201.53 454.813
  10   4  -6 2397.64 533.199
 -14  10  -6 1744.20 462.230
   4 -14  -9 9630.81 1292.01
  14 -10   9 10967.6 1040.17
 -14  10  -9 9697.78 1232.56
 -10  -4   9 9784.43 1375.11
  10   4  -9 10210.7 1146.00
 -14  10  -9 10044.0 1377.51
  10   4  -9 10155.9 1275.79
  14  -9 -10 1502.08 576.862
  -5  14 -10 1962.33 553.844
   5 -14  10 3209.12 811.218
  -9  -5 -10 2417.46 676.137
  -9  -5 -10 2933.41 864.110
 -14   9  10 3195.54 880.280
  -5  14 -10 2631.77 793.304
  -5  14  -7 62839.2 2320.74
  -9  -5  -7 64815.0 2846.22
   5 -14   7 63849.2 3035.35
  14  -9  -7 63235.6 2764.42
  -9  -5  -7 62067.9 3101.73
  -5  14  -7 65156.1 3041.94
 -14   9   7 71415.0 3287.43
  14  -9  -4 976.843 313.012
 -14   9   4 997.567 412.660
  -9  -5  -4 249.317 231.237
 -14   9   4 105.638 109.670
  -5  14  -4-73.4647 177.768
   5 -14   4 156.188 238.344
  14  -9  -4 609.887 210.459
   5 -14   4 313.581 156.276
   9   5   4 562.376 334.793
  -5  14  -4 282.661 135.750
  -5  14  -1-8.68700 51.9475
  -9  -5  -1 80.1541 213.135
   9   5   1 245.472 194.445
  -5  14  -1-9.61374 182.103
   5 -14   1-193.633 252.164
 -14   9   1-211.986 219.852
  14  -9  -1 62.3057 168.972
  -5  14  -1-12.4553 45.1119
   9   5   1 150.878 139.376
  14  -9  -1 248.345 126.966
 -14   9   1 186.434 143.001
  -9  -5  -1 363.436 183.397
  -5  14   2 59156.3 1958.74
   5 -14  -2 66792.9 1806.25
  -9  -5   2 62309.5 2383.57
  -5  14   2 64935.7 1881.06
 -14   9  -2 65791.2 2348.99
  14  -9   2 64261.5 1830.41
  -9  -5   2 62133.8 2461.98
 -14   9  -2 67515.0 2579.02
  14  -9   2 59705.9 1990.35
  -5  14   2 65737.9 1708.67
   9   5  -2 68729.1 2208.78
  -5  14   2 61043.2 2301.60
   5 -14  -5 611.101 319.254
   9   5  -5 394.370 273.277
  -5  14   5 656.323 168.304
  14  -9   5 282.638 216.359
  -9  -5   5 841.702 383.742
 -14   9  -5 596.410 259.134
  -5  14   5 81.9662 200.101
   9   5  -5 240.517 197.875
 -14   9  -5-182.447 320.510
  -5  14   5 806.923 221.127
   5 -14  -8 6098.90 977.915
  14  -9   8 3305.51 579.454
 -14   9  -8 4621.38 841.554
 -14   9  -8 3738.14 846.715
   9   5  -8 4278.80 745.124
  -9  -5   8 5095.44 982.477
   9   5  -8 3785.41 744.968
  -5  14   8 3923.81 671.795
 -14   9 -11-677.064 624.689
  -9  -5  11 585.486 516.060
 -14   9 -11 574.786 483.967
   9   5 -11-37.5365 313.720
   5 -14 -11-110.059 405.441
  -8  -6 -11 448.121 490.595
  14  -8 -11 272.719 464.312
  -6  14 -11-149.344 359.286
  -8  -6 -11-424.066 531.120
   6 -14  11 236.328 464.000
  -6  14 -11 23.1815 433.820
  14  -8  -8 21722.3 1743.65
  -8  -6  -8 20426.4 1885.47
   6 -14   8 19851.8 1748.04
  -6  14  -8 23021.0 1924.60
  -6  14  -8 21439.8 1469.10
 -14   8   8 23873.3 2012.37
  -8  -6  -8 18735.6 1566.43
   8   6   5 11847.7 1125.08
  -6  14  -5 10359.6 740.638
 -14   8   5 10690.0 661.826
  -8  -6  -5 13347.2 1221.61
   6 -14   5 9552.96 675.057
   6 -14   5 10821.0 1131.64
  -6  14  -5 9189.72 1068.27
 -14   8   5 11193.4 1217.43
  14  -8  -5 11013.1 687.315
  14  -8  -5 10203.8 986.641
   8   6   2 11984.6 749.187
   6 -14   2 14666.4 1206.76
  -6  14  -2 13244.9 1081.85
   6 -14   2 10333.2 335.147
 -14   8   2 13040.9 1187.83
  14  -8  -2 11460.3 860.247
   8   6   2 9407.51 873.748
  -8  -6  -2 13525.7 761.633
  14  -8  -2 13516.3 925.759
 -14   8   2 12361.0 859.767
  -8  -6  -2 12480.5 1090.68
  -6  14   1 4600.21 352.765
  14  -8   1 4628.70 499.830
  -6  14   1 4630.48 570.829
  -6  14   1 5261.78 570.634
  -8  -6   1 4196.92 583.243
 -14   8  -1 5502.25 702.049
   8   6  -1 4840.55 589.131
  -6  14   1 5609.71 377.309
 -14   8  -1 4948.32 665.551
   6 -14  -1 5325.78 679.654
  -8  -6   1 4444.20 664.497
   8   6  -4 3364.48 579.025
  -6  14   4 2825.02 332.390
  -8  -6   4 2929.03 608.616
 -14   8  -4 2161.42 440.002
  -6  14   4 2909.16 542.969
   8   6  -4 3135.70 526.490
  -6  14   4 3016.17 370.464
 -14   8  -4 3514.62 715.302
  14  -8   4 2620.74 462.300
   6 -14  -4 3271.82 496.716
 -14   8  -7 23862.9 1729.36
   6 -14  -7 27811.5 1858.78
  -8  -6   7 24449.0 1952.21
  -6  14   7 26105.7 1663.22
 -14   8  -7 23974.1 1930.26
   8   6  -7 25337.8 1719.27
   8   6  -7 25247.6 1675.60
 -14   8  -7 23426.7 1369.78
   6 -14 -10 1219.62 622.854
   8   6 -10 249.321 335.556
 -14   8 -10 256.129 369.304
   8   6 -10 328.542 424.508
  -8  -6  10 489.480 454.079
 -14   8 -10 4.41913 384.805
 -14   7   9 11746.6 1475.15
  -7  14  -9 11399.9 1199.00
  14  -7  -9 13505.5 1450.47
  -7  14  -9 8910.12 1303.00
  -7  -7  -9 10694.9 1198.82
   7 -14   9 14104.8 1509.98
  -7  -7  -9 16015.7 1764.42
  -7  14  -6 17624.5 1093.17
  -7  -7  -6 17940.9 1612.27
   7 -14   6 18353.1 1522.75
  -7  14  -6 18779.1 1581.53
  14  -7  -6 17881.2 926.296
 -14   7   6 21798.2 1752.30
  -7  -7  -6 17361.7 1429.08
  14  -7  -6 20229.5 1465.82
  14  -7  -6 19353.0 880.828
   7 -14   3 2678.94 559.040
  -7  -7  -3 2116.63 461.701
  -7  14  -3 1601.46 188.225
  -7  -7  -3 1992.21 261.323
  -7  14  -3 1456.41 381.514
   7   7   3 2339.06 465.186
  14  -7  -3 1785.46 344.195
   7 -14   3 2271.86 210.569
 -14   7   3 1981.45 510.907
   7   7   3 2038.30 274.914
 -14   7   3 2041.06 366.301
  14  -7  -3 1920.80 372.410
   7   7   0 11338.8 903.457
  -7  14   0 9190.59 806.723
  14  -7   0 11293.9 827.566
 -14   7   0 11049.5 1016.94
  -7  -7   0 13165.0 960.470
   7 -14   0 12070.0 1036.34
   7   7   0 12278.5 908.398
  -7  -7   0 13484.9 1159.60
 -14   7   0 11661.0 963.869
   7 -14  -3 20472.0 1076.50
  14  -7   3 22529.0 1258.20
  -7  14   3 18186.7 1331.37
  -7  14   3 21338.6 943.765
 -14   7  -3 20700.9 1226.26
  -7  -7   3 21267.4 1475.35
  -7  14   3 19155.4 950.723
 -14   7  -3 22536.9 1549.71
   7   7  -3 21051.1 1232.31
  -7  14   3 19951.0 1015.92
  -7  14   6 2541.13 559.034
   7 -14  -6 2657.78 549.514
 -14   7  -6 2863.38 686.326
   7   7  -6 2429.67 513.470
   7   7  -6 1547.09 429.496
  -7  -7   6 3584.47 797.689
 -14   7  -6 2993.00 481.916
   7 -14  -9 17713.3 1706.50
 -14   7  -9 20007.8 1817.24
   7   7  -9 17200.4 1591.35
  -7  -7   9 21915.4 2017.85
 -14   7  -9 19287.1 1908.54
  -7  14   9 15589.7 1418.81
   7   7  -9 16380.2 1553.41
  -6  -8 -10 725.036 429.500
  14  -6 -10 555.862 448.781
  -8  14 -10 1393.94 550.404
  -6  -8 -10 962.511 600.938
 -14   6  10 564.718 432.035
  -8  14 -10 2532.04 769.793
   8 -14  10 1419.07 608.829
  -8  14  -7 4278.56 638.248
  14  -6  -7 6985.93 586.604
   8 -14   7 5293.44 865.830
  -8  14  -7 6991.57 1047.52
  14  -6  -7 4931.85 811.399
 -14   6   7 4656.92 927.681
  -6  -8  -7 5813.38 966.997
  -6  -8  -7 5219.13 801.132
 -14   6   4 2094.74 569.376
  -6  -8  -4 1183.09 369.065
   6   8   4 2149.87 491.285
  14  -6  -4 1128.12 294.080
 -14   6   4 1112.38 272.488
   8 -14   4 919.703 365.692
  14  -6  -4 1982.22 426.205
  -8  14  -4 1621.83 253.235
  -8  14  -4 1508.55 454.344
   8 -14   4 1210.47 196.346
   6   8   4 1109.22 174.287
   8 -14   1 1268.98 385.251
  -6  -8  -1 1553.80 409.797
   6   8   1 1168.85 293.130
  -8  14  -1 1815.08 388.359
   6   8   1 1788.18 346.100
 -14   6   1 988.709 336.455
  -6  -8  -1 1809.06 326.675
  14  -6  -1 1283.86 322.511
 -14   6   1 2248.33 481.517
   8 -14  -2 47246.8 1364.85
  -6  -8   2 45873.6 2121.56
  -8  14   2 44571.5 1538.30
   6   8  -2 43186.8 1648.68
  -6  -8   2 45467.9 2040.55
  -8  14   2 47024.4 1507.22
 -14   6  -2 45425.1 1833.30
  14  -6   2 47010.4 1751.97
  -8  14   2 38447.3 1924.03
 -14   6  -2 47782.2 2149.51
  -8  14   2 46505.8 1278.04
   8 -14  -5 2196.57 437.251
   6   8  -5 2998.93 527.946
 -14   6  -5 2719.27 629.656
 -14   6  -5 1856.03 374.102
  -6  -8   5 2639.33 641.961
   6   8  -5 1563.38 413.206
  -8  14   5 2812.35 566.432
  14  -6   5 2158.83 491.007
 -14   6  -5 1645.41 332.862
   8 -14  -8 19824.9 1710.51
   6   8  -8 17714.4 1568.36
 -14   6  -8 22598.3 1866.97
 -14   6  -8 20668.2 1846.14
  -8  14   8 18864.1 1535.89
  -6  -8   8 19980.3 1853.95
   6   8  -8 21608.4 1652.76
 -14   6 -11 2194.65 823.864
  -6  -8  11 3477.39 963.578
   6   8 -11 2543.11 750.661
   8 -14 -11 2844.35 872.657
   6   8 -11 3180.41 809.368
 -14   6 -11 3863.71 973.552
   9 -14  11 1942.05 675.053
 -14   5  11 698.537 598.484
  -9  14 -11 764.018 533.775
  -5  -9 -11 1154.35 629.372
  -9  14 -11 819.328 585.898
  -5  -9  -8 3274.05 598.849
  -9  14  -8 3671.24 653.429
  -5  -9  -8 2977.59 775.577
   9 -14   8 3710.63 768.907
  14  -5  -8 3258.36 441.219
 -14   5   8 2318.01 653.778
  -9  14  -8 4314.90 893.759
  14  -5  -8 3893.19 793.704
   9 -14   5 4415.02 441.098
  -9  14  -5 5337.78 547.580
 -14   5   5 6064.78 634.130
  -5  -9  -5 6736.28 908.246
 -14   5   5 5757.69 915.287
   9 -14   5 4953.67 774.160
  -9  14  -5 4695.70 779.695
  14  -5  -5 3457.23 513.005
   5   9   5 4456.10 275.822
  14  -5  -5 4256.77 657.437
  -5  -9  -5 4717.80 729.038
 -14   5   2 654.590 257.494
  -5  -9  -2 928.356 360.166
   5   9   2 1165.62 337.322
   5   9   2 584.830 191.666
   9 -14   2 1289.97 417.493
  -5  -9  -2 818.104 216.345
  -9  14  -2 64.9740 216.159
  14  -5  -2 777.180 308.243
 -14   5   2 645.714 249.703
   9 -14  -1 26540.7 776.043
  -5  -9   1 21707.9 1457.21
   9 -14  -1 24905.2 1170.57
  -9  14   1 21576.3 1461.09
  -9  14   1 24235.0 1187.02
   5   9  -1 26397.7 1272.21
  14  -5   1 26103.5 1313.09
 -14   5  -1 28171.6 1481.71
  -5  -9   1 26053.6 1471.90
 -14   5  -1 25790.6 1525.64
  -9  14   1 26548.8 705.632
   9 -14  -4 31623.2 1481.72
   5   9  -4 32994.6 1788.07
  -9  14   4 29469.8 1771.25
 -14   5  -4 31453.5 1378.80
  -9  14   4 33846.9 881.023
  -5  -9   4 30793.1 1883.32
  14  -5   4 35209.0 1743.17
 -14   5  -4 32076.4 1329.25
 -14   5  -4 31698.2 1968.32
   5   9  -4 33165.1 1565.76
  -9  14   4 31732.0 881.471
 -14   5  -7 5413.98 960.229
 -14   5  -7 6268.21 974.091
   5   9  -7 6012.07 882.081
 -14   5  -7 6411.83 574.248
  -5  -9   7 8603.28 1211.55
   9 -14  -7 7125.86 952.859
  -9  14   7 6407.02 887.068
   5   9  -7 6921.87 881.469
   5   9 -10 120.456 281.984
   9 -14 -10 396.979 531.794
  -5  -9  10-118.849 363.650
 -14   5 -10 1018.01 631.468
   5   9 -10-389.424 429.121
  -9  14  10-143.575 334.503
 -14   5 -10 165.324 450.450
  -4 -10  -9 25687.2 2209.02
 -10  14  -9 25510.5 2196.47
  10 -14   9 23666.0 1902.10
 -14   4   9 22830.7 2094.68
  -4 -10  -9 25495.8 1712.53
 -10  14  -9 23331.3 1699.06
  14  -4  -9 23607.6 1979.22
   4  10   6 215.375 75.0036
  -4 -10  -6 281.271 235.472
 -10  14  -6 299.268 234.540
  -4 -10  -6 410.443 302.205
 -14   4   6 482.510 395.174
  14  -4  -6 349.112 193.615
  10 -14   6 140.768 245.042
 -10  14  -6 63.7471 316.378
  14  -4  -6 140.494 203.745
  -4 -10  -3 49828.6 2146.64
  -4 -10  -3 47964.0 1494.17
  10 -14   3 45858.6 2162.26
 -14   4   3 49597.6 2332.22
  10 -14   3 47060.8 888.622
   4  10   3 48320.1 1538.68
 -10  14  -3 47202.4 2204.74
  10 -14   3 47549.4 853.876
   4  10   3 52131.2 2025.88
  14  -4  -3 44774.5 1908.70
 -14   4   3 53640.0 1975.77
  -4 -10   0 10325.9 1003.14
 -10  14   0 12269.0 1119.45
 -10  14   0 10519.6 864.307
  -4 -10   0 12910.0 1005.68
 -14   4   0 10535.3 957.702
 -14   4   0 11552.7 986.687
   4  10   0 11410.9 836.739
  14  -4   0 12261.2 932.675
 -10  14   3 27425.0 1011.73
  10 -14  -3 23753.2 1131.04
   4  10  -3 25676.5 1555.01
 -10  14   3 24369.5 1601.00
 -10  14   3 27082.2 991.828
 -14   4  -3 24287.9 1229.37
 -14   4  -3 23679.5 1135.50
  14  -4   3 28614.3 1539.57
 -14   4  -3 27015.5 1726.99
  -4 -10   3 22610.6 1557.90
   4  10  -3 27949.2 1347.55
 -10  14   3 24883.1 1098.86
   4  10  -6 37706.1 2129.14
 -14   4  -6 37649.4 2320.42
 -14   4  -6 36142.8 1250.08
  14  -4   6 40953.9 2131.32
 -14   4  -6 36530.8 1209.89
 -10  14   6 36875.6 2141.65
  -4 -10   6 36094.0 2271.94
   4  10  -6 41853.4 1982.45
  10 -14  -6 36754.4 1914.51
   4  10  -9 636.044 370.895
 -10  14   9 2562.63 647.919
  10 -14  -9 1792.68 590.962
 -14   4  -9 1578.85 571.320
  -4 -10   9 1405.05 561.832
   4  10  -9 1916.93 582.128
 -14   4  -9 1197.57 540.905
 -11  14 -10 3532.21 755.661
  -3 -11 -10 3431.11 944.832
  11 -14  10 2677.92 685.561
 -11  14 -10 6138.67 1182.37
 -14   3  10 5229.35 1100.53
  14  -3 -10 4949.23 974.996
  -3 -11  -7 2009.23 470.054
 -11  14  -7 2464.50 508.688
  -3 -11  -7 2698.23 685.920
  14  -3  -7 1797.73 380.223
 -14   3   7 3376.55 804.720
  14  -3  -7 1817.62 525.095
  11 -14   7 2073.19 591.748
 -11  14  -7 2657.57 680.126
  -3 -11  -4 5642.53 730.072
  14  -3  -4 6180.78 759.922
 -14   3   4 6903.24 743.676
  11 -14   4 5953.55 809.464
 -11  14  -4 6551.77 520.141
   3  11   4 6447.55 559.446
 -11  14  -4 5753.82 812.512
   3  11   4 7237.11 591.751
 -14   3   4 5629.29 847.990
   3  11   4 6916.69 784.021
 -14   3   1 91.9555 191.313
 -14   3   1-160.732 220.445
  -3 -11  -1 338.269 291.109
 -11  14  -1 21.5689 181.564
  -3 -11  -1-9.79332 140.939
 -11  14  -1-284.977 241.376
   3  11   1 16.5880 100.029
  14  -3  -1 242.546 220.844
  11 -14  -2 9053.78 602.754
   3  11  -2 10674.3 1000.58
   3  11  -2 8226.09 686.927
  11 -14  -2 8889.66 638.116
  14  -3   2 8721.66 756.861
 -11  14   2 11105.0 1089.19
  14  -3   2 9011.74 840.527
 -11  14   2 9440.23 692.764
  -3 -11   2 9221.00 974.850
 -14   3  -2 8700.08 762.447
 -11  14   2 9965.20 600.284
 -14   3  -2 8768.24 969.412
 -14   3  -5 67933.6 1591.19
  11 -14  -5 72751.5 2473.92
  14  -3   5 75646.4 2759.22
 -14   3  -5 62210.9 2847.84
 -11  14   5 64665.9 2862.97
 -14   3  -5 71131.4 1679.01
   3  11  -5 70527.8 2797.82
  -3 -11   5 69626.6 3019.89
   3  11  -5 68497.3 2311.95
 -11  14   8 2631.72 661.087
  11 -14  -8 3749.66 724.161
 -14   3  -8 5999.84 1033.07
  -3 -11   8 3546.71 840.625
   3  11  -8 2938.51 722.829
 -14   3  -8 3549.97 794.680
   3  11  -8 2811.43 612.693
   3  11 -11 1974.27 652.067
  11 -14 -11 1848.27 719.792
 -14   3 -11 1591.97 760.647
 -11  14  11 2908.33 845.648
  -3 -11  11 1551.91 800.088
   3  11 -11 3024.28 829.821
 -14   3 -11 1216.26 592.743
 -12  14 -11 2607.30 744.282
  -2 -12 -11 4507.12 1115.07
  14  -2 -11 2581.42 820.814
 -14   2  11 4687.52 1134.46
 -12  14 -11 3456.31 965.620
  14  -2  -8 2656.97 662.455
  -2 -12  -8 2644.91 542.539
 -12  14  -8 2909.07 578.437
  -2 -12  -8 3305.83 816.680
  14  -2  -8 2992.63 508.115
 -14   2   8 1684.05 655.300
 -12  14  -8 1958.31 662.004
  12 -14   8 1898.16 573.174
  -2 -12  -5 994.061 327.716
 -14   2   5 868.743 279.232
 -12  14  -5 1226.11 280.251
 -14   2   5 2350.96 633.573
  12 -14   5 1903.22 491.205
   2  12   5 1603.83 303.913
   2  12   5 1262.33 268.993
 -12  14  -5 1252.25 457.345
  -2 -12  -5 1728.59 518.626
  12 -14   5 1345.37 282.015
  14  -2  -5 2589.08 549.569
  12 -14   2 82.8028 46.9774
 -14   2   2-134.885 168.656
  -2 -12  -2 296.630 223.607
   2  12   2 187.441 120.543
 -12  14  -2 234.895 229.233
 -14   2   2 444.070 327.905
  -2 -12  -2-252.556 212.025
  14  -2  -2 55.6647 160.573
  14  -2   1 94495.3 2720.12
   2  12  -1 91359.4 2185.02
   2  12  -1 91140.6 2819.27
 -12  14   1 94064.0 1581.69
 -12  14   1 90633.8 3127.08
  12 -14  -1 97599.1 2430.29
 -12  14   1 91291.5 2377.27
 -14   2  -1 102500. 2703.48
  12 -14  -1 97897.0 1674.61
 -14   2  -1 95588.4 3095.89
  -2 -12   1 91743.1 2902.36
  12 -14  -4 14695.2 1037.26
 -12  14   4 13392.4 484.869
 -14   2  -4 15898.8 815.376
 -14   2  -4 16705.3 1452.59
  14  -2   4 14513.7 1203.91
   2  12  -4 15544.4 1284.98
 -14   2  -4 14457.4 760.162
 -12  14   4 14130.2 1333.19
  -2 -12   4 19038.3 1534.82
   2  12  -4 18101.0 1091.07
  -2 -12   7 19281.8 1765.47
   2  12  -7 19242.3 1653.48
 -12  14   7 18952.8 1639.54
  14  -2   7 18912.5 1582.85
 -14   2  -7 15881.1 1596.93
  12 -14  -7 15974.5 1390.25
   2  12  -7 17325.4 1336.44
  12 -14 -10 1294.16 544.893
 -12  14  10 852.482 501.159
 -14   2 -10 780.770 532.667
   2  12 -10 1113.83 546.490
  -2 -12  10 2454.60 797.859
   2  12 -10 2499.62 839.197
 -14   2 -10 1798.01 741.533
  14  -1  -9-89.0901 292.952
 -13  14  -9 244.352 326.294
  -1 -13  -9 975.945 589.987
  14  -1  -9 499.528 277.552
 -14   1   9 1197.39 605.585
 -13  14  -9-530.926 470.917
  13 -14   9 300.638 281.158
  14  -1  -6 714.596 363.267
  -1 -13  -6 906.190 319.659
   1  13   6 417.318 196.232
  -1 -13  -6 1820.86 538.244
 -13  14  -6 475.116 258.682
  14  -1  -6 855.532 295.562
 -14   1   6 1351.12 551.534
  13 -14   6 1102.84 464.481
 -13  14  -6 1486.40 542.012
  13 -14   3 31602.0 1003.54
  -1 -13  -3 36622.9 1824.58
  13 -14   3 35118.3 1902.19
 -14   1   3 29997.7 1675.26
   1  13   3 36051.5 1640.27
 -13  14  -3 33438.2 1916.93
  13 -14   3 34944.3 998.430
  -1 -13  -3 32909.0 1446.58
  14  -1  -3 30737.0 1664.34
 -14   1   3 31745.0 1927.27
 -14   1   0 2279.05 473.257
 -14   1   0 2062.62 436.587
  -1 -13   0 2313.57 492.300
   1  13   0 1833.24 410.794
 -13  14   0 1419.47 413.651
 -13  14   0 1686.48 388.415
   1  13   0 2088.73 339.629
  14  -1   0 2379.12 424.920
 -13  14   0 1625.42 217.504
  13 -14   0 1936.60 223.450
  13 -14  -3 1663.06 342.707
  14  -1   3 1642.91 313.958
  13 -14  -3 1547.06 243.356
  14  -1   3 1579.31 421.888
   1  13  -3 1858.75 478.450
 -13  14   3 1633.33 499.381
 -13  14   3 1579.68 266.854
 -14   1  -3 2089.14 332.271
  -1 -13   3 1416.55 442.465
   1  13  -3 1474.05 299.463
 -14   1  -3 1807.19 512.148
  13 -14  -6 10735.1 1070.18
  -1 -13   6 10102.1 1262.30
   1  13  -6 9535.29 1151.58
 -13  14   6 11904.6 1314.83
  14  -1   6 12533.6 1256.78
 -14   1  -6 13726.6 1412.46
   1  13  -6 11185.8 982.581
 -13  14   9 426.368 470.845
  13 -14  -9 1124.99 539.867
 -14   1  -9 1170.96 572.375
   1  13  -9 409.652 435.071
  -1 -13   9 649.462 496.711
   1  13  -9 278.499 270.775
 -14   1  -9 585.272 601.921
   0 -14 -10-203.971 480.827
 -14  14 -10 199.597 371.840
  14   0 -10-16.2914 344.204
  14 -14  10-121.307 330.242
 -14   0  10 655.864 596.388
 -14  14 -10-92.6520 379.386
   0 -14  -7 24821.0 1475.13
 -14   0   7 25929.1 2127.74
   0 -14  -7 28047.1 2053.12
 -14  14  -7 25514.3 1577.04
  14   0  -7 25231.2 1551.57
  14 -14   7 21976.7 1659.71
 -14  14  -7 26878.0 2118.49
   0  14   7 25760.1 1302.69
  14   0  -7 27548.3 1922.54
  14 -14   4 4222.68 457.447
 -14   0   4 5338.32 751.569
   0 -14  -4 3849.15 601.338
   0 -14  -4 5904.10 815.968
   0  14   4 3874.59 553.140
  14   0  -4 3897.39 657.735
  14 -14   4 3600.05 638.959
 -14  14  -4 4837.98 793.021
 -14   0   4 3582.61 716.257
  14 -14   4 4036.26 438.867
  14   0  -1 50440.7 2077.70
   0 -14  -1 52637.5 2116.01
  14 -14   1 51592.8 1316.92
   0  14   1 51338.8 2047.81
 -14  14  -1 52236.7 2437.25
   0  14   1 53065.3 1686.72
  14 -14   1 53760.3 1181.01
 -14  14  -1 52802.0 2189.21
 -14   0   1 48352.0 2224.55
 -14   0   1 48304.2 2153.97
   0  14  -2 53936.8 1609.70
   0 -14   2 54418.8 2430.60
  14   0   2 46991.2 2043.09
 -14   0  -2 52720.0 1784.97
   0  14  -2 53654.7 2297.24
  14 -14  -2 48123.6 1647.41
  14   0   2 47345.7 1714.34
 -14  14   2 53038.7 2539.26
 -14   0  -2 43083.2 2222.85
 -14  14   2 50878.9 1726.75
 -14  14   2 49480.6 1532.53
   0 -14   2 50150.4 1671.65
  14 -14  -2 47468.2 1523.54
   0  14  -5 30579.7 1469.54
  14   0   5 29677.3 1839.26
  14 -14  -5 32629.0 1706.53
   0  14  -5 31776.3 2024.10
 -14  14   5 31995.0 2132.75
   0 -14   5 25100.5 1931.52
 -14   0  -5 28053.5 1965.09
 -14  14   8 2375.58 709.206
  14 -14  -8 3271.35 713.197
  14   0   8 2042.47 610.846
 -14   0  -8 4349.94 895.933
   0  14  -8 2445.81 687.630
   0 -14   8 2780.86 739.407
   0  14 -11 239.056 359.432
  14 -14 -11 1154.44 667.657
   0  14 -11-290.068 542.255
 -14   0 -11 244.890 517.964
 -14  14  11 556.178 456.649
 -14   0 -11 464.681 482.612
  -1  15 -10 163.312 333.234
  15 -14 -10 62.6436 354.401
 -15  14  10 115.945 467.142
  -1  15 -10 521.375 561.592
   1 -15  10 636.127 502.923
 -14  -1 -10 557.062 456.170
  -1  15  -7 5468.88 737.644
  15 -14  -7 4348.47 717.185
  -1  15  -7 5947.40 998.659
   1 -15   7 7053.03 1128.16
  14   1   7 5841.87 934.782
 -15  14   7 6896.70 1091.33
 -14  -1  -7 6580.09 1082.40
  15 -14  -4 39564.2 1738.75
   1 -15   4 43467.6 2458.00
 -14  -1  -4 37070.9 1043.58
  15 -14  -4 37728.2 1045.06
  -1  15  -4 34961.2 2064.72
 -14  -1  -4 33937.2 988.630
 -15  14   4 34086.2 2216.72
 -14  -1  -4 36257.4 2201.31
  14   1   4 44504.8 2226.57
 -15  14   4 36658.0 1068.74
  -1  15  -4 41589.0 1565.20
 -14  -1  -1 113888. 2891.54
 -15  14   1 115341. 2243.11
  14   1   1 130615. 3458.65
  -1  15  -1 121745. 3397.75
 -15  14   1 114860. 3753.08
   1 -15   1 104640. 3299.65
 -15  14   1 120677. 2977.11
  15 -14  -1 120110. 2286.82
  -1  15  -1 118079. 2263.16
 -14  -1  -1 123242. 3764.58
 -14  -1   2 18168.6 1401.02
  15 -14   2 21392.8 944.033
  -1  15   2 24535.0 1244.28
 -14  -1   2 22869.5 1588.59
  15 -14   2 23868.3 904.102
 -15  14  -2 21967.9 1576.18
   1 -15  -2 23982.7 1442.99
  -1  15   2 24302.3 1391.45
 -15  14  -2 23447.1 1607.97
  14   1  -2 20111.8 1357.03
   1 -15  -5 591.311 248.698
   1 -15  -5 1025.74 441.370
 -14  -1   5 1031.53 462.844
  -1  15   5 638.328 275.817
  15 -14   5 1147.35 320.414
 -15  14  -5 788.411 464.458
 -14  -1   5 1215.87 385.850
  14   1  -5 617.761 304.088
   1 -15  -8 475.545 416.361
  14   1  -8 740.251 420.649
  15 -14   8 1443.37 554.597
  14   1  -8 1664.21 481.304
 -14  -1   8 1476.35 679.152
 -15  14  -8 59.7354 374.388
  14   1 -11 1480.37 645.979
   1 -15 -11 771.990 567.909
 -15  14 -11 1822.02 934.406
 -14  -1  11 1354.76 806.110
  15 -13 -11 897.804 582.676
  -2  15 -11-5.40435 370.582
 -13  -2 -11 1128.81 635.360
 -15  13  11 220.215 482.417
  -2  15 -11-493.427 525.396
 -15  13   8 584.682 359.389
  15 -13  -8 299.769 329.744
  13   2   8-18.9254 282.502
  -2  15  -8 419.476 323.514
  -2  15  -8 1010.14 516.511
   2 -15   8 421.542 496.251
 -13  -2  -8 53.5789 288.305
   2 -15   5 28706.7 2001.18
  -2  15  -5 21790.3 1702.04
 -13  -2  -5 26498.2 1887.13
  15 -13  -5 26765.5 1557.71
 -15  13   5 24781.7 1919.38
  13   2   5 25466.8 1727.97
  -2  15  -5 23651.6 1229.81
  13   2   2 1814.94 357.723
 -13  -2  -2 2135.14 364.596
 -15  13   2 1705.75 493.509
  13   2   2 2418.19 518.293
  -2  15  -2 2067.42 446.963
  15 -13  -2 2143.71 392.837
   2 -15   2 1750.25 500.813
 -13  -2  -2 2370.21 578.211
 -15  13   2 2320.63 397.910
  -2  15  -2 1708.91 271.428
  15 -13  -2 2087.04 350.643
   2 -15  -1 8965.26 907.839
  -2  15   1 7747.25 674.544
 -15  13  -1 8842.45 1020.05
  13   2  -1 9811.18 933.397
  15 -13   1 8833.09 662.354
  -2  15   1 8412.13 817.046
 -15  13  -1 10982.6 1028.67
 -13  -2   1 8384.54 896.301
  -2  15   1 10070.5 684.207
  15 -13   1 10193.1 617.029
 -13  -2   1 10558.6 1064.34
  15 -13   4 7433.11 686.653
 -13  -2   4 10277.6 1187.49
 -13  -2   4 9287.06 1012.77
 -15  13  -4 9037.96 1010.39
  -2  15   4 8934.31 872.705
 -15  13  -4 8843.91 1097.83
   2 -15  -4 6968.65 824.902
  -2  15   4 10530.6 859.754
  13   2  -4 9031.60 962.602
  15 -13   4 8437.98 695.890
 -15  13  -7 962.534 437.000
   2 -15  -7 1140.81 463.006
   2 -15  -7 1300.97 367.327
 -15  13  -7 924.108 368.446
  13   2  -7 785.542 343.665
  13   2  -7 402.981 281.630
  15 -13   7 1151.10 378.407
 -13  -2   7 503.642 357.991
  -2  15   7 1290.27 400.762
  13   2 -10 441.304 444.597
   2 -15 -10 171.563 392.909
 -15  13 -10-72.7957 404.044
 -15  13 -10 7.30451 407.751
 -13  -2  10 881.334 535.694
  -3  15  -9 3528.54 676.414
  15 -12  -9 2059.44 682.597
 -12  -3  -9 2377.10 815.470
 -15  12   9 1320.54 582.777
   3 -15   9 3109.18 806.970
 -12  -3  -9 1751.82 562.931
 -15  12   6 543.483 422.858
   3 -15   6 1023.21 526.021
  15 -12  -6 175.871 212.330
  -3  15  -6 265.143 220.572
  12   3   6 1177.52 506.653
  -3  15  -6 116.432 354.296
 -12  -3  -6 515.459 323.393
 -12  -3  -3 618.899 327.473
  -3  15  -3 454.692 174.800
  12   3   3 525.122 277.484
  15 -12  -3 658.084 239.676
  -3  15  -3 468.191 251.605
   3 -15   3 525.058 346.917
  15 -12  -3 517.809 195.577
  12   3   3 411.882 161.562
   3 -15   3 500.675 183.907
 -15  12   3 108.381 230.690
 -15  12   3 571.640 216.346
 -12  -3  -3 467.384 170.825
   3 -15   0 81358.9 2764.84
  -3  15   0 72839.3 1791.69
 -12  -3   0 72439.9 2400.23
  -3  15   0 73636.4 1559.81
  -3  15   0 75503.4 2458.89
 -15  12   0 62126.5 2605.87
  15 -12   0 73775.4 1809.85
  12   3   0 75976.8 2477.50
 -15  12   0 70660.0 2468.48
 -15  12   0 67308.4 1817.51
 -12  -3   0 79000.3 2892.23
 -15  12  -3 6923.53 874.930
 -12  -3   3 6637.33 850.501
  15 -12   3 6930.14 654.565
 -12  -3   3 6151.62 845.062
   3 -15  -3 8134.54 799.965
  -3  15   3 7475.74 809.802
 -15  12  -3 8395.22 986.926
  15 -12   3 6713.26 585.907
  12   3  -3 8766.76 888.896
  -3  15   3 6376.12 648.458
  12   3  -6 1324.74 430.645
   3 -15  -6 794.043 388.197
  12   3  -6 465.003 305.478
 -15  12  -6 1115.38 434.446
 -12  -3   6 364.253 295.142
 -15  12  -6 16.7185 310.955
  15 -12   6 633.762 295.897
  -3  15   6 736.006 298.150
  15 -12   9-108.868 257.030
  12   3  -9 304.754 355.548
 -15  12  -9 597.357 425.619
 -12  -3   9 400.080 469.020
  12   3  -9 99.5753 245.381
 -15  12  -9 449.090 571.772
   3 -15  -9 532.902 470.903
  15 -11 -10 794.284 565.223
  -4  15 -10 784.514 459.175
   4 -15  10-140.871 452.701
 -11  -4 -10 84.8847 437.869
 -11  -4 -10-145.807 404.688
 -15  11  10 733.259 504.599
  -4  15 -10 891.863 577.123
  -4  15  -7 35335.0 1747.78
   4 -15   7 35532.9 2380.24
  -4  15  -7 35483.8 2354.25
 -11  -4  -7 35275.2 2247.69
  15 -11  -7 34418.1 2035.36
 -15  11   7 31092.0 2231.61
  15 -11  -4 551.018 240.598
 -15  11   4 494.384 172.561
 -15  11   4 487.931 269.892
   4 -15   4 131.230 267.411
  -4  15  -4 803.590 368.725
 -11  -4  -4 420.775 310.807
  11   4   4 1060.61 350.586
  15 -11  -4 348.994 180.796
   4 -15   4 447.949 176.744
  -4  15  -4 515.673 163.276
  -4  15  -1 73206.4 1546.68
  15 -11  -1 73544.7 1970.19
 -11  -4  -1 69804.2 2105.73
  -4  15  -1 77703.3 2606.17
 -15  11   1 75160.6 2899.31
  11   4   1 72042.0 2191.30
 -15  11   1 75372.5 2331.03
  11   4   1 67740.3 2368.00
   4 -15   1 77240.2 2802.96
  -4  15  -1 72958.3 1318.49
 -11  -4  -1 72913.8 2809.18
  -4  15   2 1541.11 313.883
  15 -11   2 1907.48 372.575
   4 -15  -2 1264.53 367.952
 -11  -4   2 3177.47 600.642
 -11  -4   2 2126.02 499.332
  -4  15   2 2141.18 336.857
 -15  11  -2 1339.79 445.626
 -15  11  -2 1757.99 448.778
  -4  15   2 1833.78 362.309
  15 -11   2 2476.23 359.007
  11   4  -2 2087.43 425.119
  -4  15   5 4698.76 545.896
 -11  -4   5 6372.37 942.226
  11   4  -5 4680.37 709.599
  -4  15   5 4721.04 503.361
 -15  11  -5 4416.13 674.530
  -4  15   5 5324.99 716.423
 -15  11  -5 3810.78 777.161
  15 -11   5 4967.00 636.490
   4 -15  -5 4929.71 722.996
  11   4  -5 6808.63 862.192
  -4  15   8 860.399 362.986
  11   4  -8 1195.42 467.947
 -15  11  -8 900.875 449.918
   4 -15  -8 366.412 332.904
  15 -11   8 1300.69 446.497
 -15  11  -8 1234.16 476.082
  11   4  -8 327.944 234.520
 -11  -4   8 1701.73 648.557
   4 -15 -11 1466.33 691.901
 -15  11 -11 1227.98 584.006
 -11  -4  11 3854.93 994.236
 -15  11 -11 1641.56 719.488
  11   4 -11 2455.83 763.109
  -5  15 -11 520.686 340.311
   5 -15  11 1678.78 692.081
 -15  10  11 219.205 433.107
  -5  15 -11 808.587 544.081
  15 -10 -11 2430.15 807.684
 -10  -5 -11 1834.08 725.115
   5 -15   8 4453.05 893.676
  -5  15  -8 4270.78 687.035
 -10  -5  -8 4160.86 922.287
  -5  15  -8 6424.94 1066.48
  15 -10  -8 4644.28 834.585
 -10  -5  -8 4815.62 864.264
 -15  10   8 5236.13 1012.16
  -5  15  -5 706.143 253.783
 -15  10   5 389.404 151.090
   5 -15   5 771.501 228.808
  15 -10  -5 404.655 270.347
   5 -15   5 1310.02 502.830
  -5  15  -5-101.583 245.874
  15 -10  -5 151.487 124.137
  10   5   5 732.922 345.733
 -15  10   5-33.1827 241.155
 -10  -5  -5 1020.94 507.005
  -5  15  -2 2961.95 546.914
   5 -15   2 3621.81 285.660
 -15  10   2 5066.04 808.954
  15 -10  -2 3041.37 468.081
 -10  -5  -2 3241.29 408.111
   5 -15   2 3521.32 645.265
  10   5   2 3022.66 408.100
  10   5   2 3787.88 580.581
 -15  10   2 2977.10 461.299
 -10  -5  -2 3516.96 653.324
  15 -10  -2 3127.20 451.013
  -5  15  -2 3384.92 264.703
 -10  -5   1 11454.7 1094.51
  -5  15   1 12296.1 667.451
 -15  10  -1 11008.2 805.431
 -10  -5   1 11060.0 969.133
  -5  15   1 11768.2 911.663
 -15  10  -1 12064.0 1090.82
  10   5  -1 10670.3 914.285
  15 -10   1 11714.0 781.440
   5 -15  -1 10991.1 1006.24
 -15  10  -1 12656.5 1096.16
  -5  15   1 11809.3 618.378
  10   5  -4 36476.1 1826.05
   5 -15  -4 36771.9 1759.83
 -10  -5   4 34446.8 1970.12
 -10  -5   4 38417.9 2157.40
  -5  15   4 40850.3 1416.26
 -15  10  -4 38615.0 1881.19
  -5  15   4 36157.9 1857.19
 -15  10  -4 39447.8 2223.59
  15 -10   4 40599.0 1693.62
  -5  15   4 36363.6 1454.20
   5 -15  -7 6640.66 957.957
 -15  10  -7 5334.39 811.615
 -15  10  -7 6659.07 812.239
  10   5  -7 7022.05 911.050
 -10  -5   7 8017.55 1168.34
  -5  15   7 7546.89 905.741
 -15  10  -7 4973.63 936.838
  10   5  -7 6574.05 922.403
   5 -15 -10 931.333 621.397
 -15  10 -10 707.490 493.589
 -10  -5  10 1054.20 676.583
  10   5 -10 569.700 421.120
  -9  -6  -9 2746.48 695.492
  -6  15  -9 3925.44 721.421
  15  -9  -9 2884.59 730.371
   6 -15   9 4456.36 944.623
  -9  -6  -9 4183.22 1010.43
  -6  15  -9 2615.28 798.884
 -15   9   9 5057.22 1025.06
  -6  15  -6 7196.35 700.462
   6 -15   6 7083.60 988.330
  -6  15  -6 7698.17 1032.87
   9   6   6 7313.48 972.676
 -15   9   6 8421.14 1129.88
  -9  -6  -6 7534.52 981.797
  15  -9  -6 7282.61 458.493
  15  -9  -6 7890.99 942.024
  -9  -6  -3 491.098 145.467
 -15   9   3 394.866 170.145
   6 -15   3 588.597 128.386
  15  -9  -3 879.287 261.912
   6 -15   3 480.573 313.047
   9   6   3 670.701 308.946
  -9  -6  -3 413.426 268.184
  -6  15  -3 387.104 230.225
  15  -9  -3 1032.31 274.898
  -6  15  -3 555.051 129.891
 -15   9   3 988.794 355.460
   9   6   3 489.469 165.066
  -6  15   0 427.953 94.7113
  -6  15   0 393.584 91.3115
  -9  -6   0 135.107 204.400
  -6  15   0 605.949 260.103
   6 -15   0 666.550 259.318
   9   6   0 302.780 204.782
 -15   9   0 815.242 279.749
  15  -9   0 327.927 165.868
 -15   9   0 154.477 184.424
  -9  -6   0 528.974 217.712
  -6  15   3 12840.0 855.764
  -9  -6   3 13622.8 1219.10
   6 -15  -3 14621.3 966.039
  -6  15   3 14516.0 873.056
  -9  -6   3 15990.3 1321.66
  -6  15   3 13298.9 1125.89
 -15   9  -3 16230.8 1378.29
  15  -9   3 13416.6 941.648
 -15   9  -3 15198.3 1159.13
   9   6  -3 14444.0 1078.60
  -6  15   3 14652.2 931.330
   6 -15  -6 6901.14 882.230
   9   6  -6 5319.38 779.042
 -15   9  -6 5864.53 718.741
  -6  15   6 5784.19 403.452
  -9  -6   6 6450.77 1013.77
  -6  15   6 5240.29 766.136
 -15   9  -6 6432.00 1037.75
  15  -9   6 5956.28 772.845
   9   6  -6 4946.09 742.709
   9   6  -9 1238.91 502.370
   6 -15  -9 647.174 480.876
 -15   9  -9 275.828 331.726
 -15   9  -9 529.533 505.068
   9   6  -9 341.849 376.626
  -9  -6   9 863.190 490.514
  -8  -7 -10 947.145 545.616
  15  -8 -10 711.268 482.010
  -8  -7 -10 449.001 466.584
   7 -15  10 818.364 451.443
  -7  15 -10 1073.97 563.065
  -7  15 -10 1037.17 466.685
 -15   8   7 44683.6 2672.33
  -7  15  -7 51344.2 2052.51
  -8  -7  -7 51229.6 2866.06
   7 -15   7 46547.0 2582.57
  -7  15  -7 51363.4 2809.28
  15  -8  -7 44799.6 2376.40
  -8  -7  -7 46699.1 2457.26
 -15   8   4 6399.39 610.798
  -7  15  -4 6962.74 501.229
 -15   8   4 6784.67 923.052
  -7  15  -4 8659.73 1033.20
   8   7   4 6060.03 306.576
   7 -15   4 7008.02 921.679
  15  -8  -4 7305.83 662.432
   8   7   4 7307.88 860.062
  15  -8  -4 6144.38 732.067
  -8  -7  -4 8292.96 987.026
   7 -15   4 6809.06 447.501
  -8  -7  -1 8846.19 956.190
   7 -15   1 9994.97 1008.28
  -7  15  -1 9306.20 895.570
 -15   8   1 7434.29 766.224
 -15   8   1 10311.7 1065.35
  -8  -7  -1 8666.88 734.186
   8   7   1 9614.58 861.610
  15  -8  -1 9300.50 761.206
   8   7   1 9495.53 794.378
  -7  15   2 231.922 116.910
  -7  15   2 337.051 187.676
   7 -15  -2 180.082 129.223
  -8  -7   2-127.139 290.454
 -15   8  -2 24.8603 165.703
  -7  15   2 70.4874 195.754
  -7  15   2 424.955 212.873
 -15   8  -2-156.241 196.977
   8   7  -2 41.3031 172.576
  15  -8   2 282.842 183.499
  -8  -7   2 355.598 258.971
   7 -15  -5 24403.3 1498.89
  15  -8   5 24225.4 1453.39
 -15   8  -5 26152.6 1443.14
  -8  -7   5 26396.0 1866.22
  -7  15   5 26885.9 1670.91
 -15   8  -5 23135.7 1807.89
  -7  15   5 23180.4 872.218
   8   7  -5 25704.1 1555.02
   8   7  -5 27175.9 1667.74
  -8  -7   8-100.564 299.276
   8   7  -8 599.995 349.609
  -7  15   8 845.766 392.438
 -15   8  -8 458.154 402.657
   7 -15  -8-148.774 299.030
   8   7  -8-41.7872 248.804
 -15   8  -8 479.268 275.651
 -15   8  -8 396.027 316.372
   8   7 -11 458.560 548.769
   7 -15 -11 336.662 548.174
 -15   8 -11 206.082 548.539
   8   7 -11 803.569 522.034
 -15   8 -11 1105.23 582.753
  15  -7 -11 1055.79 579.179
  -8  15 -11 488.998 434.617
  -7  -8 -11-151.379 575.889
 -15   7  11-56.2002 432.349
  15  -7  -8 5775.97 921.501
  -7  -8  -8 6237.15 1117.91
  -8  15  -8 3399.46 820.005
   8 -15   8 3954.06 809.336
  -7  -8  -8 6000.99 909.374
  -8  15  -8 3955.76 663.210
 -15   7   8 5891.45 1081.42
   7   8   5 2743.37 600.984
  -7  -8  -5 1173.28 441.537
  -8  15  -5 1706.02 316.583
 -15   7   5 713.830 395.208
   8 -15   5 880.969 377.577
 -15   7   5 1420.49 312.095
  -8  15  -5 2436.31 582.093
   8 -15   5 1257.41 261.315
  15  -7  -5 778.580 281.372
  15  -7  -5 949.486 340.349
  -7  -8  -2 3276.22 576.162
   7   8   2 3570.37 453.288
   8 -15   2 3119.80 603.646
  -8  15  -2 4303.07 661.234
  -7  -8  -2 4168.53 482.594
 -15   7   2 3950.20 664.604
   7   8   2 3653.43 543.228
 -15   7   2 4018.20 559.906
  15  -7  -2 3505.24 525.184
  -8  15   1-19.7234 64.7783
  -7  -8   1-35.2527 156.325
 -15   7  -1 317.420 292.007
  -7  -8   1-54.5005 175.575
   8 -15  -1 36.4059 80.7087
  -8  15   1-8.86451 163.573
  -8  15   1-150.819 152.493
 -15   7  -1 171.163 297.546
  15  -7   1 13.6179 162.472
   7   8  -1 233.608 140.523
  15  -7   4 400.706 244.727
  -7  -8   4 42.3898 255.498
  -8  15   4 252.422 128.836
   8 -15  -4 273.565 162.340
   7   8  -4 1300.70 425.122
  -8  15   4 347.068 110.374
 -15   7  -4 428.934 380.199
  -8  15   4 318.473 282.373
 -15   7  -4 157.816 164.994
   7   8  -4 395.662 223.955
   8 -15  -7 14730.2 1349.40
   7   8  -7 12769.6 1261.61
 -15   7  -7 12496.6 939.919
   7   8  -7 11927.6 1177.40
  -7  -8   7 12677.3 1451.77
  -8  15   7 15117.8 1357.95
 -15   7  -7 13480.7 1461.97
   8 -15 -10 10717.3 1469.36
 -15   7 -10 9856.24 1385.48
  -7  -8  10 10778.3 1555.41
   7   8 -10 10946.9 1347.62
 -15   7 -10 9754.63 1478.27
  -8  15  10 11033.7 1277.33
  15  -6  -9 97.3601 328.445
  -9  15  -9 1329.46 467.269
  -6  -9  -9 952.096 674.585
 -15   6   9 682.419 481.295
  -6  -9  -9 752.282 437.421
  -9  15  -9 830.306 540.543
   9 -15   9 730.851 484.061
  -9  15  -6 6024.75 641.183
  -6  -9  -6 4248.50 798.405
  15  -6  -6 5217.74 533.029
  -9  15  -6 4960.92 894.066
   9 -15   6 5398.45 877.547
  -6  -9  -6 5153.32 814.187
  15  -6  -6 3981.79 706.618
 -15   6   6 4904.65 898.731
  -6  -9  -3 41856.0 2054.47
   9 -15   3 40162.8 2108.62
   6   9   3 44520.3 1417.96
  -6  -9  -3 46688.2 1399.31
  -9  15  -3 44478.4 2156.90
  15  -6  -3 44295.6 1875.63
   6   9   3 43033.8 1924.17
 -15   6   3 43194.8 2218.53
 -15   6   3 38340.5 1634.11
  -6  -9   0 47885.4 2205.53
  15  -6   0 51153.9 1880.29
   9 -15   0 46912.6 2154.57
  -9  15   0 46123.7 1844.59
 -15   6   0 43209.7 1984.79
   6   9   0 54248.7 1922.52
  -6  -9   0 53264.5 2007.01
 -15   6   0 46566.0 2024.52
  -9  15   3 144919. 2572.81
   9 -15  -3 146975. 2860.62
   6   9  -3 143295. 3713.36
  -9  15   3 138549. 3839.54
  -9  15   3 151354. 2521.98
 -15   6  -3 141169. 3223.29
  -6  -9   3 143049. 3954.67
   6   9  -3 138798. 3169.77
 -15   6  -3 158720. 4202.01
  15  -6   3 148355. 3439.65
  -9  15   3 141275. 2626.53
   9 -15  -6 34947.5 1898.10
  15  -6   6 35968.7 1977.21
   6   9  -6 36042.9 2048.47
 -15   6  -6 37626.6 1517.26
  -9  15   6 36501.9 2103.16
  -6  -9   6 35981.6 2311.24
 -15   6  -6 42807.8 2506.36
   6   9  -6 38383.5 1970.57
   9 -15  -9 13633.4 1475.81
 -15   6  -9 12211.5 1490.28
   6   9  -9 11869.5 1386.75
  -6  -9   9 13748.1 1665.69
 -15   6  -9 13115.7 1590.16
   6   9  -9 11659.7 1321.93
 -10  15 -10 5961.51 967.207
  15  -5 -10 3802.51 864.546
  -5 -10 -10 4215.57 1006.50
  10 -15  10 4321.53 899.119
 -15   5  10 4755.54 1078.64
 -10  15 -10 4690.55 1079.60
  -5 -10  -7 3519.37 667.565
 -10  15  -7 3275.36 567.987
 -15   5   7 3866.27 848.851
  -5 -10  -7 4362.65 882.369
 -10  15  -7 4605.25 901.915
  15  -5  -7 4662.07 546.390
  10 -15   7 4753.98 826.193
  15  -5  -7 4700.63 808.844
  10 -15   4 24587.1 1682.88
 -15   5   4 24838.7 1357.16
 -10  15  -4 23581.7 881.618
   5  10   4 24361.5 969.524
 -10  15  -4 24010.7 1704.44
   5  10   4 26597.2 1595.17
 -15   5   4 22643.0 1694.77
  15  -5  -4 22595.5 1438.44
  10 -15   4 23765.0 790.191
  -5 -10  -4 22851.6 1534.74
 -15   5   1 270.032 206.736
 -15   5   1 497.521 340.015
   5  10   1 372.795 216.518
  -5 -10  -1 63.9889 256.677
  10 -15   1 538.359 302.416
 -10  15  -1 443.187 250.702
  15  -5  -1 405.388 206.638
  -5 -10  -1 593.390 253.358
  10 -15  -2 31796.5 1120.79
  10 -15  -2 28045.8 1173.44
 -10  15   2 32710.5 1888.80
 -10  15   2 30932.1 1282.92
  15  -5   2 28986.8 1476.12
 -15   5  -2 32352.3 1556.69
 -15   5  -2 36863.3 1979.26
  -5 -10   2 33065.1 1803.11
   5  10  -2 29992.9 1384.79
 -10  15   2 30889.0 1008.11
   5  10  -2 33876.1 1788.81
  10 -15  -5 83.6287 206.659
  -5 -10   5 606.681 335.448
 -15   5  -5 476.516 373.634
  15  -5   5 510.190 334.941
   5  10  -5 65.2439 219.220
 -15   5  -5 232.840 149.182
 -15   5  -5 301.597 189.842
 -10  15   5 146.106 298.564
   5  10  -5 49.4238 161.863
 -10  15   8 2576.94 634.158
  10 -15  -8 2032.49 584.681
 -15   5  -8 2974.73 825.523
  -5 -10   8 2573.37 729.107
 -15   5  -8 3031.58 736.124
   5  10  -8 3880.98 794.257
   5  10  -8 2235.10 541.933
  10 -15 -11 1043.46 571.440
 -15   5 -11 1791.23 769.587
  -5 -10  11 1063.82 583.833
 -15   5 -11 1693.33 708.618
   5  10 -11 2310.97 716.519
   5  10 -11 360.924 445.196
  15  -4 -11 65.6455 442.430
  -4 -11 -11 507.932 618.051
  11 -15  11 1248.32 636.532
 -15   4  11 840.457 581.308
 -11  15 -11 326.030 456.196
 -15   4   8 47162.7 2927.55
 -11  15  -8 53106.2 2341.18
  -4 -11  -8 54839.1 3065.12
  15  -4  -8 52965.2 1952.98
  15  -4  -8 54809.8 2821.22
  11 -15   8 53813.5 2796.83
 -11  15  -8 54992.0 3132.34
  -4 -11  -8 49106.0 2367.97
  -4 -11  -5 632.701 295.546
 -11  15  -5 1429.80 323.668
 -15   4   5 1462.06 380.797
 -15   4   5 768.030 375.473
  -4 -11  -5 1582.72 528.458
  11 -15   5 955.118 219.562
 -11  15  -5 1779.53 571.448
   4  11   5 918.322 202.657
   4  11   5 1016.89 219.500
  11 -15   5 356.935 209.984
  15  -4  -5 1196.51 408.033
   4  11   2 404.263 238.427
 -15   4   2 42.8745 155.885
 -15   4   2 492.251 299.554
  -4 -11  -2 596.129 207.986
  -4 -11  -2 1218.21 407.169
   4  11   2 409.914 204.629
  15  -4  -2 454.155 211.196
 -11  15  -2 190.601 244.110
  11 -15   2 823.888 312.081
  11 -15  -1 8329.97 450.855
  -4 -11   1 9342.20 1029.53
  11 -15  -1 6695.54 633.321
 -11  15   1 7452.16 909.293
 -11  15   1 5931.89 633.777
  -4 -11   1 7948.17 864.256
 -11  15   1 7812.38 407.450
 -15   4  -1 7495.56 784.910
  15  -4   1 9988.30 889.427
   4  11  -1 8697.73 737.393
 -15   4  -1 6711.64 837.650
 -15   4  -4-149.238 183.919
 -11  15   4 67.3243 75.3898
  -4 -11   4-231.818 285.652
   4  11  -4 378.942 282.050
  15  -4   4 289.528 257.246
 -11  15   4 103.339 94.4087
 -15   4  -4 182.919 166.898
  11 -15  -4 445.004 277.043
 -11  15   4 536.070 356.463
 -15   4  -4 30.7429 239.487
   4  11  -4 57.9452 213.846
  -4 -11   7 205.760 300.890
   4  11  -7 394.985 294.783
  11 -15  -7 269.511 280.115
  15  -4   7 338.014 325.694
 -11  15   7 100.080 239.143
 -15   4  -7 906.932 523.353
 -15   4 -10 360.667 383.596
  11 -15 -10 221.882 438.974
 -11  15  10 165.400 437.623
  -4 -11  10-206.591 551.173
   4  11 -10 167.336 305.386
   4  11 -10-108.323 304.752
 -15   4 -10 396.689 479.568
 -15   3   9 6739.81 1215.32
 -12  15  -9 9502.33 1112.09
  -3 -12  -9 10336.0 1464.71
 -12  15  -9 11094.8 1483.50
  12 -15   9 8945.13 1196.29
  15  -3  -9 9637.15 1337.51
  -3 -12  -9 10341.9 1076.33
  15  -3  -6 2588.35 548.843
  -3 -12  -6 2379.36 607.802
  15  -3  -6 3593.04 530.370
 -15   3   6 2285.29 648.530
   3  12   6 3438.73 383.241
 -12  15  -6 2175.45 557.430
  -3 -12  -6 3809.94 653.395
  12 -15   6 3895.57 710.854
 -15   3   3 7901.38 842.608
  -3 -12  -3 9752.56 986.275
  -3 -12  -3 8916.61 735.866
 -12  15  -3 8899.96 1018.34
   3  12   3 7626.16 699.184
  12 -15   3 8591.99 974.191
  12 -15   3 8391.33 374.807
   3  12   3 8691.92 841.444
  15  -3  -3 7768.29 844.465
 -15   3   3 8466.39 1025.94
  12 -15   3 7797.20 372.424
  -3 -12   0 17185.7 1217.83
  -3 -12   0 13710.9 1227.70
 -12  15   0 16076.7 1358.89
 -12  15   0 17205.5 1161.10
  15  -3   0 17317.9 1172.13
 -15   3   0 17112.5 1317.07
   3  12   0 14296.5 943.481
 -15   3   0 13547.6 1097.35
 -12  15   3 44883.1 1519.06
  12 -15  -3 48312.3 1327.67
   3  12  -3 51756.5 2318.47
 -12  15   3 49325.4 2426.75
  -3 -12   3 43551.7 2252.58
 -12  15   3 48380.1 1412.33
  15  -3   3 50844.4 2159.83
 -15   3  -3 42242.6 1603.11
 -15   3  -3 49512.9 2455.27
   3  12  -3 51026.3 1820.45
  12 -15  -3 45173.8 1579.88
  12 -15  -6 15592.5 1275.62
 -15   3  -6 15965.9 1555.90
   3  12  -6 18322.7 1554.92
 -12  15   6 15814.5 1494.32
  15  -3   6 19758.1 1538.36
  -3 -12   6 14870.5 1489.19
   3  12  -6 17647.3 1275.92
   3  12  -9 61.4063 300.855
 -12  15   9-191.631 357.083
  12 -15  -9 715.748 501.519
  -3 -12   9-156.465 407.153
   3  12  -9 81.3033 335.867
 -15   3  -9-43.4853 430.819
 -15   3  -9 340.347 366.308
  13 -15  10 2455.67 679.194
 -13  15 -10 2679.88 694.457
  -2 -13 -10 3160.07 914.963
 -15   2  10 2739.57 872.828
  15  -2 -10 3678.23 875.780
 -13  15 -10 1986.89 818.679
  -2 -13  -7 2689.97 550.118
  13 -15   7 2788.26 651.517
 -13  15  -7 2346.78 504.054
  -2 -13  -7 1745.89 622.023
  15  -2  -7 2453.10 481.619
  15  -2  -7 2968.83 663.486
 -15   2   7 1896.83 642.419
 -13  15  -7 3015.40 769.802
 -15   2   4 4120.00 626.119
  -2 -13  -4 4422.54 682.193
   2  13   4 3711.62 488.438
 -13  15  -4 3692.91 708.306
   2  13   4 3537.14 497.911
  13 -15   4 4128.21 702.970
   2  13   4 4469.93 657.361
  13 -15   4 4369.55 408.756
  15  -2  -4 3851.94 620.412
 -15   2   4 5320.11 862.698
  13 -15   4 4260.68 392.567
  -2 -13  -1 80959.2 2873.18
  15  -2  -1 91103.1 2762.21
 -15   2   1 86536.8 2928.40
 -13  15  -1 74684.2 2898.11
 -15   2   1 86992.5 2950.07
   2  13   1 82358.2 2263.90
 -13  15  -1 82757.1 2741.74
  -2 -13  -1 87017.2 2673.44
  13 -15  -2 11037.8 698.198
 -15   2  -2 12502.0 1200.96
   2  13  -2 10680.8 1057.89
  13 -15  -2 12262.0 809.927
  15  -2   2 9788.20 832.593
 -13  15   2 9908.43 1108.67
 -13  15   2 10669.7 651.534
 -13  15   2 13185.2 868.404
  15  -2   2 11724.6 1020.22
   2  13  -2 13050.1 872.253
 -15   2  -2 11756.3 894.423
  -2 -13   2 11984.8 1160.07
   2  13  -5 25802.1 1429.78
  13 -15  -5 27230.0 1536.10
 -15   2  -5 21901.8 832.646
   2  13  -5 26367.9 1827.06
 -15   2  -5 23493.8 1839.51
 -13  15   5 24676.3 1871.19
  15  -2   5 24269.3 1658.59
 -15   2  -5 23419.4 871.893
  -2 -13   5 22932.3 1802.01
   2  13  -8-206.156 227.400
  13 -15  -8-110.073 258.671
   2  13  -8-203.813 304.068
  -2 -13   8 750.142 535.128
  15  -2   8-97.7966 325.350
 -15   2  -8 286.711 363.617
   2  13 -11 609.155 456.654
  13 -15 -11 1601.08 742.176
 -13  15  11 2176.49 735.405
  -2 -13  11 578.245 613.958
 -15   2 -11 1393.70 545.838
 -15   2 -11 1170.20 600.483
  -1 -14 -11 20147.4 2240.29
 -15   1  11 19617.6 2243.60
 -14  15 -11 16300.0 1997.79
  15  -1  -8 3088.70 749.961
  -1 -14  -8 4114.08 677.999
 -15   1   8 5715.28 1072.06
 -14  15  -8 5234.35 796.061
  -1 -14  -8 4044.25 889.125
  15  -1  -8 3789.10 628.436
  14 -15   8 3094.57 690.408
 -14  15  -8 4937.36 994.724
  15  -1  -5 2986.55 584.557
  -1 -14  -5 3608.64 613.453
 -15   1   5 2723.23 570.362
  -1 -14  -5 2325.88 572.213
   1  14   5 2324.19 405.385
 -15   1   5 3260.16 709.676
  14 -15   5 3504.18 450.243
 -14  15  -5 4436.97 846.394
  14 -15   5 3740.09 702.038
  -1 -14  -2 205.879 231.646
 -15   1   2 263.858 251.208
  14 -15   2 87.5846 79.5807
  -1 -14  -2 438.029 295.295
 -15   1   2 246.994 198.264
  14 -15   2 46.8425 46.5851
 -14  15  -2 443.454 310.460
   1  14   2 336.248 207.881
 -14  15  -2-105.739 248.442
  15  -1  -2-164.001 210.797
   1  14  -1 30096.3 1266.81
 -15   1  -1 30337.1 1546.54
  -1 -14   1 26380.3 1646.05
   1  14  -1 29738.2 1700.25
 -14  15   1 23664.0 1706.93
  14 -15  -1 29355.5 1022.94
 -14  15   1 24976.3 1340.53
 -14  15   1 29344.3 997.541
  15  -1   1 30762.2 1647.05
 -15   1  -1 30748.9 1890.39
  14 -15  -4 13681.1 1022.49
 -15   1  -4 11791.4 686.301
  14 -15  -4 11508.7 518.867
   1  14  -4 10457.4 1119.71
 -14  15   4 10689.7 1240.55
 -15   1  -4 10823.3 1219.43
  15  -1   4 10445.1 1084.66
 -14  15   4 11644.4 559.412
  -1 -14   4 13309.4 1354.36
   1  14  -4 10684.9 836.935
 -15   1  -4 13092.5 741.043
  15  -1   7 2962.53 676.073
   1  14  -7 2377.75 654.488
  14 -15  -7 1063.24 433.162
  -1 -14   7 2563.51 735.298
   1  14  -7 1522.69 403.632
 -15   1  -7 1406.63 539.599
 -14  15   7 1227.38 537.901
   1  14 -10 2790.24 729.568
  14 -15 -10 3889.32 914.301
 -14  15  10 4488.04 1017.59
   1  14 -10 4261.84 1007.83
  -1 -14  10 4327.95 1068.10
 -15   1 -10 2609.48 846.127
   0 -15  -9 10157.2 1460.06
 -15  15  -9 9178.85 1135.97
 -15   0   9 8833.72 1383.98
  15   0  -9 11654.0 1170.26
  15 -15   9 9501.26 1211.23
 -15  15  -9 9978.84 1462.79
  15   0  -9 11424.8 1429.24
   0 -15  -6 44066.7 2040.35
   0 -15  -6 41907.4 2388.51
  15   0  -6 41310.2 2251.99
  15   0  -6 39986.5 1982.13
   0  15   6 37209.0 1665.19
 -15  15  -6 39316.0 2540.92
  15 -15   6 43113.3 1773.24
  15 -15   6 39335.2 2183.16
 -15   0   3 10790.7 1177.21
 -15   0   3 10490.7 1075.85
   0 -15  -3 10967.3 1061.76
   0  15   3 11805.5 949.931
 -15  15  -3 10463.2 1157.60
 -15  15  -3 11895.8 1214.09
  15 -15   3 11564.9 620.169
   0 -15  -3 13906.6 1044.12
  15   0  -3 10721.1 1048.72
  15 -15   3 10835.1 648.299
   0 -15   0 580.438 326.424
 -15   0   0 808.873 333.349
 -15   0   0 1073.02 340.803
   0  15   0 817.069 302.134
   0  15   0 808.800 225.217
 -15  15   0 717.456 403.533
 -15  15   0 1322.97 395.356
  15   0   0 1302.17 389.480
  15 -15   0 649.312 159.017
 -15  15   0 859.250 188.166
  15 -15  -3 359.907 192.410
 -15  15   3 635.217 396.041
 -15   0  -3 225.640 121.264
   0  15  -3 221.109 193.291
  15 -15  -3 232.690 157.709
  15   0   3 42.4955 158.836
 -15   0  -3-55.7811 229.584
  15   0   3 336.206 265.792
 -15  15   3 586.919 215.836
   0  15  -3 128.824 152.259
   0 -15   3 431.354 312.295
  15 -15  -6 1876.33 500.925
   0  15  -6 1533.65 498.312
  15   0   6 1323.83 461.808
   0 -15   6 2497.12 698.157
 -15  15   6 1576.25 540.237
 -15   0  -6 299.107 271.869
   0  15  -6 2238.66 482.977
 -15  15   9 1426.35 639.300
  15 -15  -9 958.041 448.031
 -15   0  -9 450.840 381.907
   0  15  -9 1474.18 676.836
   0  15  -9 1623.58 523.513
   0 -15   9 1239.85 593.047
  15   0   9 1029.45 545.508
  -1  16  -8 2252.11 538.817
  16 -15  -8 1909.46 576.652
  -1  16  -8 1160.34 610.198
  15   1   8 664.645 435.398
 -16  15   8 996.009 527.134
   1 -16   8 1447.61 602.765
 -15  -1  -8 1854.70 652.640
  16 -15  -5 17119.9 1263.87
   1 -16   5 17471.6 1661.50
  -1  16  -5 17150.7 1555.39
  15   1   5 17320.4 1506.54
 -16  15   5 17099.2 1649.51
 -15  -1  -5 15168.4 1503.63
  -1  16  -5 17734.4 1123.30
 -15  -1  -2 56991.8 1957.60
  -1  16  -2 53336.7 1618.36
   1 -16   2 49971.6 2480.26
  -1  16  -2 59512.5 2531.25
   1 -16   2 50028.6 1656.30
  15   1   2 46727.8 1807.29
 -16  15   2 44714.3 2467.13
 -16  15   2 58000.4 1986.60
  15   1   2 53827.7 2327.29
 -15  -1  -2 53944.9 2672.46
  16 -15  -2 51971.2 1701.37
 -15  -1   1 93225.5 3088.75
  16 -15   1 85376.1 1925.39
  -1  16   1 97104.1 2962.95
 -16  15  -1 81600.0 3223.46
  15   1  -1 98917.7 3096.55
  16 -15   1 94423.4 1797.67
 -16  15  -1 88446.3 2996.18
 -15  -1   1 79594.1 3046.07
  -1  16   1 80934.8 2097.63
   1 -16  -1 84390.9 2894.43
 -15  -1   4 35388.6 2240.23
 -15  -1   4 36275.3 2071.60
  16 -15   4 41615.8 1419.37
 -16  15  -4 39639.4 2237.97
  -1  16   4 39925.5 1872.87
 -16  15  -4 38532.6 2332.97
  -1  16   4 42307.8 1913.47
  15   1  -4 40375.9 2114.92
  16 -15   7 5613.22 877.077
  15   1  -7 4959.93 769.173
   1 -16  -7 5960.27 749.407
   1 -16  -7 5600.49 952.900
  16 -15   7 5174.78 720.627
 -15  -1   7 2390.37 772.900
 -16  15  -7 4109.80 939.442
  15   1  -7 4202.18 804.013
  15   1 -10 1590.83 732.800
   1 -16 -10 814.468 712.003
 -16  15 -10 595.668 566.813
 -15  -1  10 2634.52 910.427
  14   2   9 6517.06 1105.78
  16 -14  -9 5441.70 995.917
  -2  16  -9 5310.83 850.557
   2 -16   9 6485.06 1195.94
 -16  14   9 4448.57 968.111
  -2  16  -9 6695.47 1162.99
 -14  -2  -9 6474.69 1132.18
   2 -16   6-124.297 358.532
  16 -14  -6 47.6534 196.710
  -2  16  -6 346.833 227.787
 -16  14   6-285.004 291.207
  -2  16  -6 581.444 282.399
  14   2   6 311.696 352.062
 -14  -2  -6-31.5727 327.699
 -16  14   3 35529.7 1389.60
 -14  -2  -3 39310.2 1349.63
   2 -16   3 35029.5 2147.97
  14   2   3 39606.9 2046.25
  14   2   3 34324.4 1310.92
  16 -14  -3 35698.1 1368.61
 -16  14   3 35980.4 2256.72
   2 -16   3 34730.3 1357.89
 -14  -2  -3 39167.6 2271.87
  -2  16  -3 44062.6 2268.64
  -2  16  -3 35747.7 1285.54
  16 -14  -3 34264.4 1539.12
 -16  14   0 22293.4 1660.86
 -14  -2   0 24583.6 1478.76
  -2  16   0 21079.1 1123.48
  14   2   0 22514.3 1428.30
   2 -16   0 26444.9 1659.80
  -2  16   0 25988.0 1543.52
 -16  14   0 21825.9 1400.37
 -16  14   0 22784.9 1028.58
  16 -14   0 21642.7 955.956
  -2  16   0 22960.8 992.958
 -14  -2   0 21990.6 1629.38
  16 -14   3 292.271 220.674
 -14  -2   3-17.5123 204.292
  -2  16   3 480.438 229.449
  -2  16   3 508.173 240.204
  -2  16   3 293.787 206.827
 -16  14  -3 300.757 277.816
 -16  14  -3 411.728 349.349
 -14  -2   3 113.009 245.681
  16 -14   3 409.832 174.643
  14   2  -3 112.271 291.419
   2 -16  -6 533.914 360.923
   2 -16  -6 1297.78 420.209
  14   2  -6 970.610 351.209
 -16  14  -6 937.946 441.746
 -14  -2   6 749.511 547.612
  16 -14   6 1130.94 387.633
  -2  16   6 513.141 281.645
 -16  14  -6 1393.82 508.110
  14   2  -6 1355.36 479.385
  14   2  -9 2095.77 641.901
   2 -16  -9 1890.04 665.434
 -16  14  -9 2053.31 616.485
  14   2  -9 2235.66 585.614
  16 -14   9 834.030 407.555
 -16  14  -9 397.609 397.156
 -14  -2   9 1631.02 727.116
  16 -13 -10 7380.88 1232.36
  -3  16 -10 8823.61 1150.85
   3 -16  10 6196.89 1183.59
 -13  -3 -10 7721.48 1365.52
  -3  16 -10 7084.44 1259.00
 -13  -3 -10 5648.78 1100.64
 -16  13  10 7638.30 1311.84
 -16  13   7 1427.78 564.300
  16 -13  -7 1678.24 498.667
  -3  16  -7 1627.09 409.192
   3 -16   7 2041.23 655.004
 -13  -3  -7 1372.19 500.390
  -3  16  -7 1900.02 624.950
  13   3   7 1201.70 462.233
 -16  13   4 835.428 377.035
 -13  -3  -4 930.678 429.126
 -16  13   4 1067.68 222.349
   3 -16   4 594.800 371.908
  -3  16  -4 1807.40 516.468
 -13  -3  -4 567.043 119.395
  16 -13  -4 673.782 208.932
  16 -13  -4 1518.39 398.334
  -3  16  -4 1075.63 269.865
   3 -16   4 881.261 245.641
  13   3   4 840.374 268.780
 -13  -3  -4 549.611 119.143
 -13  -3  -1 2772.94 475.601
   3 -16   1 2267.08 528.591
  13   3   1 4192.04 639.998
  -3  16  -1 2053.15 473.989
 -16  13   1 2976.77 503.462
 -16  13   1 2753.92 606.833
 -16  13   1 2272.24 367.735
  16 -13  -1 3693.71 462.470
  -3  16  -1 3022.33 319.132
 -13  -3  -1 3536.31 689.344
 -13  -3   2 20550.0 1527.69
 -13  -3   2 23287.8 1590.52
  16 -13   2 20160.2 1092.83
  -3  16   2 18849.6 1201.10
 -16  13  -2 17721.8 1433.70
 -16  13  -2 23271.7 1615.77
  -3  16   2 20864.7 1074.25
  16 -13   2 21239.9 993.360
  13   3  -2 20131.6 1343.05
   3 -16  -2 21229.2 1388.52
   3 -16  -5 5067.43 771.323
 -13  -3   5 3861.95 806.241
  -3  16   5 4266.53 532.591
 -16  13  -5 4999.00 766.240
  13   3  -5 4585.73 714.098
  -3  16   5 5015.19 710.838
 -16  13  -5 5392.12 930.171
  13   3  -5 3617.38 661.050
  16 -13   5 4381.99 583.254
   3 -16  -8 217.287 525.789
 -16  13  -8 160.644 326.365
  13   3  -8 128.514 260.245
 -16  13  -8 746.632 442.075
  13   3  -8 133.161 269.204
 -13  -3   8 552.875 443.163
  16 -12 -11 7704.14 1288.83
   4 -16  11 9335.64 1509.81
 -12  -4 -11 10852.8 1709.86
  -4  16 -11 8668.61 1483.74
 -16  12  11 12128.9 1712.46
 -12  -4 -11 11758.0 1567.82
 -12  -4  -8 28.0378 275.467
  16 -12  -8 23.6187 293.789
  -4  16  -8 19.2723 240.932
 -16  12   8-264.666 401.732
   4 -16   8 550.636 535.931
  -4  16  -8 229.059 329.187
  12   4   8-214.470 269.090
 -12  -4  -5 179.480 302.317
  -4  16  -5 183.388 136.131
   4 -16   5 244.495 289.093
  -4  16  -5 290.264 313.885
  16 -12  -5-4.18208 206.867
  16 -12  -5 54.4975 83.1725
  12   4   5-303.166 222.067
 -16  12   5 598.599 361.405
  12   4   2 11655.1 1038.07
  -4  16  -2 11743.1 1114.27
 -12  -4  -2 14122.4 880.697
 -16  12   2 12608.2 1307.79
   4 -16   2 12467.6 1211.74
  12   4   2 11682.3 832.295
 -12  -4  -2 13339.8 1271.15
  16 -12  -2 12675.0 905.105
  -4  16  -2 11014.5 562.391
 -16  12   2 12982.1 930.952
   4 -16   2 12055.2 629.693
  -4  16   1 331.522 149.076
 -12  -4   1 190.019 282.586
  -4  16   1 231.000 168.255
  -4  16   1 281.038 141.333
 -16  12  -1 611.926 285.768
 -16  12  -1 196.920 219.764
 -12  -4   1 178.719 169.205
 -16  12  -1 560.127 228.938
  12   4  -1 257.726 234.569
  16 -12   1 369.270 194.744
   4 -16  -1 329.222 171.263
   4 -16  -4-156.227 213.195
 -12  -4   4 289.907 363.055
  -4  16   4 671.861 245.377
 -16  12  -4 215.410 254.574
  -4  16   4 799.953 342.330
 -12  -4   4 130.686 219.969
 -16  12  -4 55.8860 238.028
  16 -12   4 421.434 250.956
  12   4  -4 309.099 243.799
 -12  -4   7 15492.4 1636.45
   4 -16  -7 11352.6 1257.03
 -16  12  -7 13025.0 1229.03
  12   4  -7 13330.7 1250.68
  12   4  -7 16753.0 1508.40
  -4  16   7 13248.4 1180.54
 -16  12  -7 13464.1 1573.44
  16 -12   7 16271.0 1291.45
   4 -16 -10-80.8029 376.631
 -16  12 -10 841.208 523.255
 -16  12 -10 223.746 377.346
 -12  -4  10 227.421 545.504
  12   4 -10-141.119 362.058
  16 -11  -9 317.337 383.401
  -5  16  -9 295.778 237.582
 -16  11   9 477.539 394.624
 -11  -5  -9 245.082 436.710
   5 -16   9 898.540 478.694
 -11  -5  -9 447.854 568.901
  -5  16  -9 1393.64 613.607
 -11  -5  -6 2108.58 585.867
  -5  16  -6 1976.64 409.398
 -16  11   6 2627.12 749.358
  16 -11  -6 898.103 418.193
  11   5   6 2080.70 571.756
   5 -16   6 3124.30 737.829
  -5  16  -6 1441.72 522.240
 -11  -5  -3 2529.83 312.689
  -5  16  -3 3452.24 658.712
  16 -11  -3 2097.53 379.657
   5 -16   3 2984.50 632.752
   5 -16   3 3035.66 313.147
 -16  11   3 2888.25 656.694
 -16  11   3 3136.21 445.308
 -11  -5  -3 3925.50 738.958
  16 -11  -3 4154.67 556.421
  11   5   3 3414.49 614.051
  -5  16  -3 3309.75 316.034
 -11  -5   0 42400.1 2198.72
  -5  16   0 39895.3 1088.01
   5 -16   0 34946.2 1900.64
  16 -11   0 42648.7 1512.51
 -11  -5   0 39562.3 1770.07
  -5  16   0 43875.7 1914.75
 -16  11   0 41756.4 2156.32
 -16  11   0 40375.5 1900.01
  11   5   0 43625.0 1891.63
  -5  16   0 42306.9 1007.78
 -11  -5   3 41620.0 2171.19
  11   5  -3 46379.6 2027.49
   5 -16  -3 46036.4 1789.01
 -11  -5   3 50486.9 2418.10
  -5  16   3 46117.1 1674.27
  -5  16   3 40460.0 1990.07
 -16  11  -3 44436.7 2124.86
  16 -11   3 44068.9 1637.49
 -16  11  -3 44561.9 2319.64
   5 -16  -6 3494.27 674.077
  11   5  -6 3659.91 660.827
  -5  16   6 3919.10 426.739
 -16  11  -6 3807.48 641.474
  -5  16   6 4262.57 691.919
 -16  11  -6 4103.28 861.770
  16 -11   6 3761.99 615.758
  11   5  -6 3549.33 663.257
 -11  -5   6 3397.56 760.317
  11   5  -9 868.646 469.950
   5 -16  -9 1592.00 622.616
 -16  11  -9 2273.13 659.290
 -16  11  -9 2420.25 811.695
 -11  -5   9 1868.93 713.014
  16 -10 -10 12036.7 1494.85
  -6  16 -10 12650.6 1334.20
 -10  -6 -10 14092.4 1836.54
   6 -16  10 11254.5 1502.19
  -6  16 -10 13518.6 1715.93
 -10  -6 -10 12628.0 1473.28
 -16  10  10 8803.07 1418.95
 -10  -6  -7 1520.51 523.334
 -16  10   7 327.937 325.305
  -6  16  -7 825.185 263.978
  16 -10  -7 1559.38 451.194
   6 -16   7 705.959 416.372
  10   6   7 1258.26 502.556
  -6  16  -4 22105.8 905.575
  -6  16  -4 20172.4 1579.85
   6 -16   4 19323.4 1582.32
  16 -10  -4 21126.8 1072.24
 -16  10   4 23431.3 1787.16
  10   6   4 22037.5 1539.70
 -10  -6  -4 20879.6 1612.52
  16 -10  -4 21718.9 1381.88
   6 -16   4 22316.8 857.447
 -16  10   4 22133.1 1077.75
  10   6   1 9769.69 835.981
   6 -16   1 10622.9 1090.20
 -16  10   1 9903.86 878.886
  -6  16  -1 11412.1 1030.88
 -10  -6  -1 11481.5 862.044
 -16  10   1 10852.1 1137.32
  10   6   1 9865.46 919.960
  16 -10  -1 13748.8 922.755
 -10  -6  -1 8924.03 1016.52
  -6  16   2 9512.09 652.396
 -10  -6   2 7808.90 955.197
  -6  16   2 10707.1 1055.00
  -6  16   2 8127.49 735.398
 -10  -6   2 10000.5 1008.37
 -16  10  -2 8137.62 899.126
  10   6  -2 9187.71 874.051
 -16  10  -2 9318.77 1014.15
  16 -10   2 11259.8 843.039
  -6  16   5 343.238 214.901
   6 -16  -5 81.5573 173.456
  16 -10   5 6.41881 150.531
  10   6  -5-168.366 197.693
  -6  16   5-16.2622 103.346
 -16  10  -5 113.477 261.887
 -16  10  -5 414.703 456.183
  -6  16   5 187.774 236.149
 -10  -6   5-153.741 257.696
  10   6  -5 169.488 233.152
   6 -16  -8 2833.03 686.789
  10   6  -8 2515.89 630.638
 -16  10  -8 2743.33 676.705
 -16  10  -8 3059.19 585.110
  10   6  -8 2491.19 645.898
 -10  -6   8 2989.92 821.784
  -6  16   8 3548.76 716.866
 -16  10  -8 2634.56 764.763
  10   6 -11 4251.77 901.012
   6 -16 -11 3292.27 931.022
 -16  10 -11 2121.27 774.747
 -16  10 -11 5464.74 1181.28
 -10  -6  11 3264.32 967.555
   7 -16  11 967.553 561.604
  16  -9 -11 589.333 515.048
 -16   9  11 493.453 554.693
  -7  16 -11 669.270 452.560
  -7  16  -8 6056.60 791.093
  -9  -7  -8 6012.17 1054.23
   7 -16   8 5016.46 935.946
  -7  16  -8 4061.80 926.411
  -9  -7  -8 6412.26 993.815
 -16   9   8 5689.39 1033.59
  16  -9  -8 4182.50 787.830
  16  -9  -5-26.5303 264.020
 -16   9   5-22.1084 237.040
  -9  -7  -5 685.707 374.089
  -7  16  -5-92.8201 141.277
 -16   9   5 186.802 163.459
   7 -16   5 34.9383 123.697
   9   7   5-118.166 223.386
  -7  16  -5-339.911 388.055
  16  -9  -5-33.4654 175.352
   7 -16   5-137.369 251.053
  -7  16  -2 28280.3 1690.28
  16  -9  -2 25649.3 1347.75
 -16   9   2 28370.8 1843.71
  -9  -7  -2 26467.0 1182.11
   9   7   2 27135.9 1552.09
 -16   9   2 24780.5 1326.47
   9   7   2 25778.8 1204.12
   7 -16   2 29677.7 1813.29
  -9  -7  -2 27872.9 1766.68
  -9  -7   1-113.999 220.375
  -7  16   1 89.0508 69.0557
  -7  16   1 175.370 94.3536
  -9  -7   1 355.595 362.898
   7 -16  -1 207.510 202.005
  -7  16   1 13.4130 138.880
 -16   9  -1 45.8334 228.474
 -16   9  -1-128.372 225.015
  16  -9   1-122.462 144.267
   9   7  -1-99.1342 155.306
  -7  16   4 83.0878 135.307
   7 -16  -4 42.5644 173.240
   9   7  -4 155.496 228.302
  16  -9   4-116.495 210.874
  -7  16   4 0.51027 109.865
 -16   9  -4 262.565 245.908
  -7  16   4 327.487 288.787
 -16   9  -4 90.8303 252.224
  -9  -7   4 477.095 420.622
   9   7  -4 162.374 208.883
  16  -9   7-65.9339 285.999
   9   7  -7 675.779 378.904
   7 -16  -7 80.2876 212.297
   9   7  -7 571.197 366.808
 -16   9  -7-56.5547 232.084
 -16   9  -7-157.586 319.827
  -7  16   7-163.471 315.019
  -9  -7   7 729.564 483.583
   9   7 -10 332.034 409.615
   7 -16 -10 115.012 357.739
 -16   9 -10 407.045 422.670
 -16   9 -10 285.135 537.577
   9   7 -10 398.792 463.033
  -8  -8  -9 195.843 361.047
  16  -8  -9-168.246 333.514
  -8  16  -9 160.070 253.923
  -8  -8  -9-495.581 414.004
 -16   8   9 197.135 397.875
   8 -16   9-334.307 416.860
  -8  16  -9 282.239 461.448
  16  -8  -6 112.172 287.646
   8 -16   6 194.239 249.677
  -8  -8  -6-215.606 315.804
 -16   8   6 742.046 391.731
  -8  16  -6 18.3234 156.168
  16  -8  -6 279.202 186.781
  -8  16  -6-209.028 311.862
   8   8   6 198.297 284.673
  -8  16  -3 7108.96 910.676
  -8  -8  -3 7121.07 540.951
 -16   8   3 6110.07 905.169
  16  -8  -3 5857.32 690.918
   8   8   3 7246.34 835.754
   8   8   3 6576.90 532.176
 -16   8   3 7774.50 752.471
   8 -16   3 6821.67 902.225
  -8  -8  -3 6883.41 877.545
 -16   8   0 136.043 176.133
   8   8   0 25.0373 129.569
  -8  -8   0 444.345 369.274
  -8  -8   0 167.422 222.603
  -8  16   0 87.7978 161.636
 -16   8   0 320.189 238.636
   8 -16   0 34.4237 195.494
  16  -8   0-27.9993 157.267
  -8  -8   3 5.00110 192.734
   8 -16  -3-3.18173 110.843
  -8  16   3 70.5799 134.280
  -8  16   3-158.590 158.736
  -8  -8   3-54.1699 260.780
  -8  16   3-21.6416 128.452
  -8  16   3 56.3537 207.198
 -16   8  -3-65.9511 157.609
   8   8  -3-176.811 214.796
 -16   8  -3 287.700 224.772
  16  -8   3-11.2246 152.665
   8   8  -6 1308.75 410.343
  -8  -8   6 908.207 416.011
   8 -16  -6 1471.44 440.296
  16  -8   6 742.063 372.583
   8   8  -6 1099.76 386.293
 -16   8  -6 737.772 326.026
  -8  16   6 1404.32 487.122
 -16   8  -6 1653.04 551.986
   8 -16  -9 9153.26 1250.69
 -16   8  -9 12992.4 1525.74
   8   8  -9 10331.8 1278.73
  -8  -8   9 8246.33 1301.06
 -16   8  -9 9321.68 1406.51
  -8  16   9 9899.77 1179.46
   8   8  -9 11152.2 1325.36
  16  -7 -10 6816.16 1165.22
  -9  16 -10 5254.32 893.552
 -16   7  10 7617.59 1336.34
  -7  -9 -10 5731.41 1196.43
  -9  16 -10 8136.73 1358.89
   9 -16  10 6080.33 1117.21
  16  -7  -7-17.1191 248.119
  -7  -9  -7 179.719 273.941
   9 -16   7 4.90982 268.486
  -9  16  -7 360.129 213.079
 -16   7   7 1123.90 521.074
  -7  -9  -7 422.575 350.953
  16  -7  -7-81.1399 142.735
  -9  16  -7 198.095 368.927
  -9  16  -4 10494.1 555.864
  -7  -9  -4 9356.46 1040.51
 -16   7   4 10625.6 858.816
  -9  16  -4 9984.20 1114.57
   9 -16   4 8958.60 449.254
 -16   7   4 12066.4 1288.46
   7   9   4 8002.74 907.308
   9 -16   4 12375.9 1246.24
  16  -7  -4 9170.55 920.676
   7   9   4 8924.93 530.707
   7   9   1 72651.4 2356.52
 -16   7   1 76347.0 2552.12
  -9  16  -1 74585.3 2589.37
  -7  -9  -1 72875.1 2810.80
   9 -16   1 70549.7 2784.61
 -16   7   1 72972.6 2804.43
  16  -7  -1 69755.7 2215.00
  -7  -9  -1 74835.2 2273.60
   9 -16  -2 5788.14 495.884
  -9  16   2 5340.66 616.744
  -7  -9   2 5436.83 833.597
 -16   7  -2 5709.63 813.888
  -9  16   2 5337.88 782.189
  -9  16   2 6843.12 651.959
 -16   7  -2 8164.37 854.141
  -7  -9   2 6236.78 814.092
   7   9  -2 7518.95 744.997
  16  -7   2 6093.77 682.336
  -9  16   2 6185.64 462.076
   9 -16  -5 14493.0 1158.78
   7   9  -5 14931.1 1302.81
 -16   7  -5 15987.0 1546.54
 -16   7  -5 14707.9 1030.12
  16  -7   5 14937.5 1221.59
  -9  16   5 13421.4 1283.89
  -7  -9   5 15945.9 1512.16
  -9  16   5 11337.7 487.126
   7   9  -5 13558.5 1139.18
   9 -16  -8 10595.0 1244.20
   7   9  -8 10174.0 1231.44
  -7  -9   8 8521.64 1263.59
  -9  16   8 11724.3 1288.27
 -16   7  -8 10022.9 1341.31
  16  -7   8 10975.6 1224.85
   7   9  -8 8183.08 1044.26
   7   9 -11 6174.89 1113.36
 -16   7 -11 9987.57 1547.23
   7   9 -11 10341.1 1418.46
  -7  -9  11 7609.22 1397.80
 -16   7 -11 9641.94 1593.37
  16  -6 -11 137.596 396.144
  -6 -10 -11 1503.08 683.690
  10 -16  11 338.691 485.621
 -16   6  11 44.1336 423.252
 -10  16 -11-495.501 569.208
  16  -6  -8 834.394 410.435
 -10  16  -8 2278.37 498.829
  -6 -10  -8 1305.19 575.023
  10 -16   8 420.494 318.130
 -16   6   8 1477.98 545.376
  -6 -10  -8 1926.63 510.389
 -10  16  -8 2050.75 700.775
 -16   6   5 17377.8 1129.91
 -10  16  -5 18105.3 917.008
 -10  16  -5 17536.4 1563.20
 -16   6   5 19219.1 1691.21
   6  10   5 19427.1 1476.82
  10 -16   5 18285.5 1541.79
  10 -16   5 17117.6 791.056
  16  -6  -5 21086.1 1487.20
   6  10   5 15489.6 551.707
  -6 -10  -5 18716.5 1440.43
  -6 -10  -2 36579.2 1480.43
  -6 -10  -2 33482.9 1908.07
   6  10   2 33521.3 1478.07
  10 -16   2 33254.4 1927.92
 -10  16  -2 32109.5 1782.97
 -16   6   2 37134.2 2048.69
   6  10   2 33994.7 1679.71
  16  -6  -2 37087.8 1712.44
 -16   6   2 32753.7 1661.98
  16  -6   1 4565.66 616.920
  -6 -10   1 3923.87 660.936
  10 -16  -1 4061.96 296.749
 -10  16   1 5356.91 792.393
 -10  16   1 4338.31 558.983
 -16   6  -1 4053.58 622.485
   6  10  -1 4666.98 597.964
  -6 -10   1 4060.85 635.264
 -16   6  -1 3187.32 610.386
 -10  16   1 4244.97 265.624
  10 -16  -4 2204.76 425.092
  -6 -10   4 2895.45 633.852
   6  10  -4 1172.92 409.352
 -10  16   4 2876.68 615.165
 -10  16   4 2279.50 283.118
 -16   6  -4 2263.52 452.098
 -16   6  -4 3453.44 733.384
 -16   6  -4 2401.09 428.769
  16  -6   4 1504.48 384.544
   6  10  -4 1725.24 392.215
 -10  16   4 2183.96 289.082
   6  10  -7 2919.46 589.425
  -6 -10   7 3768.08 830.678
   6  10  -7 3737.79 768.027
  10 -16  -7 4223.27 751.530
 -16   6  -7 3302.81 459.771
 -10  16   7 3792.73 767.537
  16  -6   7 2304.90 561.887
 -16   6  -7 3269.79 825.174
   6  10 -10 501.891 447.422
  10 -16 -10 586.361 448.383
 -16   6 -10-57.3170 466.983
  -6 -10  10 1799.86 768.753
   6  10 -10 585.004 568.861
 -16   6 -10 463.019 556.233
 -16   5   9 9074.62 1378.73
 -11  16  -9 13984.1 1300.05
  -5 -11  -9 11402.1 1547.67
 -11  16  -9 13994.8 1706.44
  11 -16   9 12553.9 1463.21
  16  -5  -9 11997.2 1449.87
  -5 -11  -9 13821.2 1350.88
  11 -16   6 18138.6 1572.64
  -5 -11  -6 17564.2 1596.13
  16  -5  -6 19777.8 1173.87
 -11  16  -6 17651.1 1664.33
 -11  16  -6 21267.5 1189.22
 -16   5   6 20861.4 1843.64
  16  -5  -6 21644.7 1618.25
  -5 -11  -6 20168.0 1505.62
  -5 -11  -3 4115.95 489.889
  -5 -11  -3 3810.45 663.496
   5  11   3 4159.09 500.797
  11 -16   3 3878.82 670.279
  16  -5  -3 4989.07 672.083
 -11  16  -3 3849.38 690.285
   5  11   3 4227.40 643.028
 -16   5   3 4503.26 755.132
 -16   5   3 4617.50 629.171
  -5 -11   0 8987.76 997.300
 -11  16   0 8504.91 1020.29
 -11  16   0 9088.13 863.923
 -16   5   0 8904.18 944.087
 -16   5   0 9833.27 982.512
   5  11   0 7486.34 726.781
  16  -5   0 10312.7 912.670
  -5 -11   0 10201.2 953.032
  11 -16  -3 6361.30 608.722
 -11  16   3 6954.20 589.566
   5  11  -3 6071.54 824.649
 -11  16   3 5261.22 778.827
 -11  16   3 6387.24 550.588
 -16   5  -3 7640.69 769.044
 -11  16   3 5921.38 541.668
  -5 -11   3 7210.23 930.206
  16  -5   3 5952.38 753.201
 -16   5  -3 7349.26 985.672
   5  11  -3 7377.66 746.009
   5  11  -6 2362.07 513.045
  11 -16  -6 1797.22 487.001
  -5 -11   6 3875.28 802.359
   5  11  -6 2890.51 664.571
 -16   5  -6 1970.81 335.936
 -16   5  -6 2297.50 703.864
 -11  16   6 2124.09 577.274
  16  -5   6 3089.54 656.686
   5  11  -9 104.896 282.548
 -11  16   9 176.250 319.658
 -16   5  -9 999.672 618.551
  11 -16  -9 428.685 320.481
  -5 -11   9 579.271 507.113
   5  11  -9-16.4382 303.903
  16  -4 -10 10211.0 1418.48
 -16   4  10 11422.1 1619.16
  -4 -12 -10 9915.25 1485.28
 -12  16 -10 10689.6 1586.64
  -4 -12  -7 16347.2 1378.80
 -16   4   7 19643.4 1875.81
  -4 -12  -7 18104.6 1727.14
  16  -4  -7 17628.1 1172.52
 -12  16  -7 19299.2 1818.78
  16  -4  -7 17588.7 1550.81
  12 -16   7 18641.1 1667.23
  -4 -12  -4 1475.64 441.598
 -16   4   4 1948.32 442.870
 -16   4   4 2501.03 593.800
   4  12   4 2373.04 375.529
   4  12   4 2715.46 522.915
   4  12   4 2330.84 379.481
  16  -4  -4 3290.90 586.090
 -12  16  -4 2944.55 628.514
  12 -16   4 2737.64 601.412
  12 -16   4 2807.56 279.159
  12 -16   4 2280.66 246.798
 -16   4   1 829.572 377.145
 -16   4   1 801.821 330.329
  -4 -12  -1 752.617 316.914
 -12  16  -1 350.517 280.338
  -4 -12  -1 597.226 294.021
 -12  16  -1 456.010 226.337
   4  12   1 875.753 288.118
  16  -4  -1 252.213 169.395
 -16   4  -2 38.2946 204.404
 -12  16   2-44.6686 109.404
  12 -16  -2 1.29305 88.3861
   4  12  -2 137.945 219.211
  12 -16  -2 63.9816 135.810
 -12  16   2 231.404 293.114
  -4 -12   2-174.291 243.239
 -12  16   2 26.0494 123.826
  16  -4   2 148.392 219.622
   4  12  -2 203.569 227.267
 -16   4  -2-249.955 377.677
  12 -16  -5 15880.0 1185.96
  16  -4   5 17942.4 1407.57
   4  12  -5 18343.7 1503.99
  -4 -12   5 20428.8 1690.54
 -12  16   5 20452.4 1685.17
   4  12  -5 17360.6 1215.14
 -16   4  -5 21340.1 1053.49
 -16   4  -5 18868.5 1667.56
   4  12  -8 1738.24 484.406
 -12  16   8 1632.77 623.087
  12 -16  -8 801.221 408.368
  -4 -12   8 1154.00 581.791
   4  12  -8 298.973 253.983
  16  -4   8 709.800 446.638
 -16   4  -8 1287.29 575.933
  12 -16 -11 1822.32 736.117
 -12  16  11 377.187 460.838
 -16   4 -11 200.852 496.019
  -4 -12  11 333.342 438.436
   4  12 -11 848.656 662.660
   4  12 -11 1151.56 524.712
 -16   4 -11 44.4663 511.133
  16  -3  -8 364.347 424.316
  13 -16   8 110.195 374.944
  -3 -13  -8-107.830 257.034
 -13  16  -8 522.870 389.236
  -3 -13  -8 147.595 310.277
  16  -3  -8 110.919 207.312
 -16   3   8 378.963 458.061
 -13  16  -8-157.441 403.487
   3  13   5 26623.9 1694.44
  -3 -13  -5 22948.7 1570.76
 -16   3   5 23791.0 1518.14
   3  13   5 23152.4 1113.20
  13 -16   5 22834.1 1707.91
 -13  16  -5 26064.5 1957.51
  13 -16   5 23816.0 1034.34
  16  -3  -5 26077.0 1713.37
 -16   3   5 23277.6 1871.04
  -3 -13  -2 22185.2 1550.13
   3  13   2 20003.5 1249.55
  -3 -13  -2 20816.8 1245.68
 -13  16  -2 17141.3 1453.10
 -16   3   2 21318.8 1582.11
 -13  16  -2 20300.3 1478.91
 -16   3   2 20417.1 1419.59
  16  -3  -2 19051.4 1314.37
 -16   3  -1 2548.71 576.889
  13 -16  -1 3086.17 297.865
  -3 -13   1 2919.85 588.570
 -16   3  -1 2571.86 487.807
   3  13  -1 2510.73 547.598
 -13  16   1 3519.75 685.187
  16  -3   1 2833.63 514.753
 -13  16   1 3454.79 512.546
   3  13  -1 3079.20 455.481
 -13  16   1 2983.68 281.124
  13 -16  -4 70508.2 2248.93
 -13  16   4 62506.9 1323.09
  -3 -13   4 64862.3 2947.51
   3  13  -4 72338.9 2926.15
 -13  16   4 71703.6 3132.45
 -16   3  -4 62439.1 1819.39
 -16   3  -4 65024.9 2976.06
  16  -3   4 64324.1 2611.99
 -16   3  -4 65833.6 1898.54
   3  13  -4 66724.1 2229.23
   3  13  -7 2036.94 522.809
  13 -16  -7 1077.04 408.157
   3  13  -7 2294.73 663.192
  -3 -13   7 1558.35 506.248
  16  -3   7 2540.16 679.217
 -16   3  -7 3191.98 792.016
 -13  16   7 1644.03 555.591
   3  13 -10 23960.6 1957.50
  13 -16 -10 27414.8 2301.71
 -16   3 -10 24955.0 2322.02
   3  13 -10 21584.8 2082.89
 -13  16  10 26547.8 2201.67
  -3 -13  10 27997.5 2492.67
  16  -3  10 30672.7 2389.02
  16  -2  -9 2733.78 783.373
  -2 -14  -9 1306.97 627.198
  14 -16   9 2067.47 651.990
 -16   2   9 1855.97 723.117
 -14  16  -9 1613.78 743.535
 -16   2   6 20155.2 1829.60
  -2 -14  -6 15041.8 1271.25
  -2 -14  -6 14290.2 1441.27
  16  -2  -6 16412.2 1221.78
  14 -16   6 18970.8 1590.98
   2  14   6 14490.1 915.306
 -14  16  -6 15872.2 1612.64
  16  -2  -6 15734.8 1425.94
  14 -16   3 58.4227 67.4866
 -16   2   3 304.379 242.955
  -2 -14  -3-301.419 243.041
  -2 -14  -3-166.421 246.459
 -16   2   3 242.871 247.710
 -14  16  -3 170.944 301.280
   2  14   3 202.991 241.990
  14 -16   3 7.44120 59.6572
  16  -2  -3 117.859 220.285
   2  14   0 14922.0 1215.65
  -2 -14   0 18858.3 1340.46
 -14  16   0 18011.1 1504.55
 -14  16   0 14541.2 1120.63
 -14  16   0 14701.2 545.471
   2  14   0 14554.6 948.303
  16  -2   0 17293.9 1252.76
 -16   2   0 14884.0 1199.86
 -16   2   0 15876.7 1383.27
  14 -16  -3 19910.8 1079.11
  16  -2   3 21016.4 1164.39
  14 -16  -3 18929.7 911.115
 -14  16   3 21598.3 1715.13
 -14  16   3 22655.5 1043.86
 -16   2  -3 25269.2 1836.11
  16  -2   3 20659.4 1436.05
 -16   2  -3 20821.9 1148.60
   2  14  -3 21080.9 1177.98
   2  14  -3 22242.3 1591.45
  -2 -14   3 20258.0 1636.03
  14 -16  -6 3152.81 603.468
   2  14  -6 3087.52 693.527
  16  -2   6 3393.16 728.320
  -2 -14   6 5564.64 987.774
 -16   2  -6 3264.57 778.123
   2  14  -6 2472.85 509.399
 -14  16   6 3378.71 761.455
   2  14  -9 587.228 434.683
 -14  16   9-3.97505 351.869
  14 -16  -9 622.838 470.574
  16  -2   9 461.388 424.055
   2  14  -9-488.055 492.350
  -2 -14   9 619.093 563.347
 -16   2  -9-528.148 506.149
  -1 -15 -10 4917.93 1125.07
 -15  16 -10 4297.28 1102.08
 -16   1  10 5777.10 1201.86
  16  -1 -10 4360.00 990.576
  15 -16  10 2890.88 731.646
  16  -1  -7 2367.88 642.892
  15 -16   7 1466.63 505.922
  -1 -15  -7 2507.77 550.416
  -1 -15  -7 1025.97 526.319
 -15  16  -7 1754.72 478.166
  16  -1  -7 1661.68 457.152
 -16   1   7 1402.47 563.791
 -15  16  -7 1720.97 637.487
  15 -16   4 8296.90 582.100
 -16   1   4 7403.52 1066.53
 -16   1   4 9391.60 1015.74
  -1 -15  -4 6784.76 850.299
  15 -16   4 7434.74 537.035
   1  15   4 7166.01 759.164
 -15  16  -4 8357.25 1093.44
   1  15   4 9396.81 952.792
  16  -1  -4 9012.78 1013.18
  15 -16   1 14568.5 599.150
 -16   1   1 18107.0 1445.59
   1  15   1 19633.8 1365.54
 -15  16  -1 16750.5 1475.09
 -15  16  -1 17191.1 1326.38
  -1 -15  -1 14114.9 1164.63
  16  -1  -1 15868.1 1242.63
   1  15   1 16056.8 1010.11
  15 -16   1 15663.0 558.493
 -16   1   1 16883.3 1378.26
  15 -16  -2 8190.59 628.253
  -1 -15   2 10810.6 1153.97
 -16   1  -2 6943.82 1003.35
   1  15  -2 8956.19 1009.04
  15 -16  -2 8510.63 736.843
 -15  16   2 7834.61 1052.89
 -15  16   2 7627.31 725.884
  16  -1   2 7465.29 862.986
 -15  16   2 8868.57 648.416
   1  15  -2 8941.48 725.693
 -16   1  -2 9470.43 839.592
   1  15  -5 762.812 294.753
  -1 -15   5 799.117 481.321
  15 -16  -5-8.89233 255.552
   1  15  -5 143.428 236.627
 -16   1  -5 492.250 139.704
  16  -1   5 609.182 345.520
 -15  16   5 280.718 385.202
 -16   1  -5 690.259 369.967
   1  15  -8 14146.9 1286.38
  15 -16  -8 13189.8 1395.70
   1  15  -8 15760.7 1664.59
  16  -1   8 15977.5 1615.02
 -15  16   8 14544.0 1631.53
 -16   1  -8 11810.9 1503.46
  -1 -15   8 15948.9 1793.79
 -16   0   8 11839.1 1573.61
   0 -16  -8 14473.4 1617.70
  16   0  -8 9180.48 1253.43
  16   0  -8 9518.23 1040.89
  16 -16   8 10541.5 1240.42
 -16  16  -8 14787.9 1760.58
 -16   0   5 5629.93 1000.83
   0 -16  -5 5683.93 787.156
 -16   0   5 5305.33 820.966
 -16  16  -5 7508.44 1072.47
  16 -16   5 5169.45 549.537
   0  16   5 6343.03 752.848
 -16  16  -5 6804.79 1040.47
  16   0  -5 5157.92 836.515
 -16   0   2 40.0737 224.458
  16 -16   2 274.555 111.770
   0  16   2-3.05197 207.265
 -16   0   2-164.242 286.917
   0 -16  -2 98.3677 205.046
 -16  16  -2 184.500 240.676
   0  16   2 143.329 172.960
 -16  16  -2-110.316 229.558
  16   0  -2-220.996 248.782
  16 -16   2 137.254 81.6244
 -16   0  -1 5104.16 678.671
   0  16  -1 6350.92 591.921
   0  16  -1 6584.81 849.162
 -16  16   1 6052.34 922.840
   0 -16   1 7805.50 965.689
  16 -16  -1 6679.76 536.222
 -16  16   1 5845.14 712.613
 -16  16   1 5550.58 487.101
  16   0   1 6344.78 809.869
 -16   0  -1 6045.82 923.887
  16 -16  -4 6824.96 750.968
 -16   0  -4 5101.48 468.799
   0 -16   4 4079.93 825.100
   0  16  -4 6080.47 927.746
 -16  16   4 5940.77 995.216
  16   0   4 4991.34 771.028
 -16   0  -4 6451.83 978.963
 -16  16   4 5549.54 457.798
   0  16  -4 5543.26 617.989
  16 -16  -7 5139.24 834.964
   0  16  -7 4672.09 920.428
 -16  16   7 7575.16 1199.72
  16   0   7 7598.73 1090.37
   0 -16   7 6364.08 1091.18
 -16   0  -7 6114.35 1114.18
   0  16  -7 5060.66 735.051
   0  16 -10 1740.13 554.928
  16 -16 -10 2147.01 775.173
 -16  16  10 1972.35 819.014
   0  16 -10 1640.54 719.235
  16   0  10 1400.91 634.389
   0 -16  10 447.420 437.775
 -16   0 -10 1881.41 746.280
  -1  17  -9 8871.34 1096.99
  17 -16  -9 7861.04 1184.33
 -16  -1  -9 9527.37 1420.09
  -1  17  -9 8292.09 1349.02
  16   1   9 10545.2 1466.95
 -17  16   9 13187.1 1656.32
   1 -17   9 12336.3 1659.27
 -16  -1  -6-358.341 447.175
  17 -16  -6-133.917 299.050
  -1  17  -6-46.4442 292.312
  -1  17  -6 29.0305 185.887
   1 -17   6 240.153 435.768
 -17  16   6-142.501 338.894
  16   1   6-177.160 342.497
  17 -16  -3-97.4899 170.960
   1 -17   3 188.069 315.664
  -1  17  -3-211.257 250.211
 -16  -1  -3 276.973 193.248
 -17  16   3-547.407 411.962
  16   1   3-34.3913 226.678
 -17  16   3 43.9388 141.518
 -16  -1  -3-162.904 335.703
  -1  17  -3 376.955 226.995
 -16  -1   0 8180.60 917.337
  -1  17   0 11071.1 1080.63
 -17  16   0 9378.58 1124.73
 -17  16   0 8297.84 598.816
  17 -16   0 8993.95 590.235
 -17  16   0 8387.74 922.213
   1 -17   0 8030.47 970.902
  -1  17   0 8789.13 688.612
 -16  -1   0 9683.98 1132.22
  16   1   0 8311.68 927.030
 -16  -1   3 2534.79 584.574
  -1  17   3 1937.56 412.631
  -1  17   3 2312.91 468.632
 -16  -1   3 2794.78 633.384
 -17  16  -3 1732.33 534.064
 -17  16  -3 3621.69 721.420
  17 -16   3 2597.05 327.214
  16   1  -3 1988.54 489.185
   1 -17  -6 3081.08 680.935
   1 -17  -6 2150.65 510.805
  16   1  -6 3330.14 644.517
 -17  16  -6 4435.28 831.004
  -1  17   6 3441.72 587.007
 -16  -1   6 2980.36 792.520
  17 -16   6 2437.86 463.666
 -17  16  -6 2710.38 747.877
  16   1  -6 3015.74 652.866
  16   1  -9 1257.44 580.051
   1 -17  -9 1449.86 733.416
 -16  -1   9 1843.50 736.583
 -17  16  -9-115.503 612.439
   2 -17  10 1476.28 765.623
  17 -15 -10 1999.73 561.216
 -17  15  10 4498.38 1059.24
  -2  17 -10 4197.46 1035.08
  15   2  10 3938.00 977.364
 -15  -2 -10 2029.78 655.926
  -2  17  -7 5895.29 751.849
  17 -15  -7 7492.62 1016.54
   2 -17   7 8246.60 1284.68
  -2  17  -7 7785.67 1191.56
 -17  15   7 5075.70 1014.27
  15   2   7 7474.25 1083.61
 -15  -2  -7 5506.34 1022.67
  17 -15  -4 1914.65 435.001
   2 -17   4 1298.66 473.123
 -15  -2  -4 2366.58 623.852
  -2  17  -4 2367.89 635.512
 -15  -2  -4 2123.28 274.134
  15   2   4 1539.14 475.294
 -17  15   4 1728.76 585.698
 -17  15   4 1701.74 290.797
  -2  17  -4 1869.64 360.780
 -15  -2  -1 29335.7 1553.19
  -2  17  -1 25255.6 1235.60
  -2  17  -1 28891.3 1745.59
 -17  15   1 29500.2 2005.78
 -15  -2  -1 31085.5 2009.27
  17 -15  -1 27612.0 1194.30
   2 -17   1 26722.6 1794.91
 -17  15   1 28535.3 1568.39
  -2  17  -1 23740.9 1015.63
  15   2   1 24393.3 1592.24
 -15  -2   2 16995.8 1464.14
 -15  -2   2 18514.8 1505.97
  17 -15   2 17469.0 956.906
  17 -15   2 17089.8 840.894
  -2  17   2 18507.0 1278.89
 -17  15  -2 17853.9 1541.41
 -17  15  -2 16423.6 1420.36
   2 -17  -2 16679.5 1313.37
  -2  17   2 18425.0 1085.42
  15   2  -2 20232.6 1423.63
 -15  -2   5 23800.8 1957.62
   2 -17  -5 25616.3 1759.57
  -2  17   5 24555.2 1381.59
 -17  15  -5 25474.9 1835.29
  -2  17   5 22002.9 1442.81
 -15  -2   5 25116.4 1799.65
 -17  15  -5 22499.8 1874.00
  15   2  -5 24445.7 1727.16
  17 -15   5 24764.5 1291.71
  15   2  -8-73.0449 311.633
   2 -17  -8-58.8112 373.442
 -17  15  -8 527.357 454.085
  15   2  -8 223.433 342.705
 -15  -2   8 166.963 349.204
  17 -15   8 337.664 331.381
  17 -14  -8 6252.66 981.244
  -3  17  -8 7074.23 890.319
   3 -17   8 7795.06 1241.90
  -3  17  -8 8670.59 1308.95
  14   3   8 9178.34 1273.97
 -17  14   8 8327.00 1305.21
 -14  -3  -8 5784.97 1016.29
  -3  17  -5 16345.0 1542.63
 -17  14   5 20077.5 1816.81
  14   3   5 23209.8 1757.79
 -14  -3  -5 20157.1 1730.35
   3 -17   5 20956.4 1781.22
  17 -14  -5 18785.8 1366.30
  -3  17  -5 19396.9 1101.20
 -14  -3  -2 11980.2 878.686
  -3  17  -2 12777.0 1204.84
 -17  14   2 13340.0 1391.91
  14   3   2 11121.9 904.422
   3 -17   2 14852.3 1371.87
   3 -17   2 11536.2 711.664
 -17  14   2 10678.3 879.025
  14   3   2 9304.83 995.935
  -3  17  -2 12809.8 700.433
 -14  -3  -2 10054.5 1175.88
  17 -14  -2 13967.7 948.538
  -3  17   1 21130.5 1124.78
 -14  -3   1 22333.2 1663.89
 -14  -3   1 24185.6 1586.58
  17 -14   1 21676.4 1154.84
   3 -17  -1 22612.0 1572.31
  -3  17   1 21159.2 1385.31
 -17  14  -1 19566.2 1549.58
  17 -14   1 20974.8 975.791
 -17  14  -1 18087.4 1402.18
  -3  17   1 20136.9 972.145
  14   3  -1 24764.3 1564.54
  17 -14   4 51445.1 1737.50
 -14  -3   4 53141.3 2562.31
 -14  -3   4 52825.0 2742.60
   3 -17  -4 56742.8 2348.55
  -3  17   4 54773.7 2012.58
 -17  14  -4 53143.1 2533.87
  -3  17   4 52016.7 2271.95
 -17  14  -4 55043.1 2810.15
  14   3  -4 55601.4 2488.68
  17 -14   7 6867.56 847.136
   3 -17  -7 6767.59 1024.96
  14   3  -7 6315.53 879.544
 -14  -3   7 4214.63 919.081
  -3  17   7 6226.21 814.996
 -17  14  -7 6531.10 1141.79
  14   3  -7 4918.53 869.081
  14   3 -10 1153.24 550.248
   3 -17 -10 1776.04 743.786
 -17  14 -10 1215.84 546.466
 -17  14 -10 645.611 534.554
 -14  -3  10 1279.50 726.911
 -13  -4  -9 2401.36 726.687
  17 -13  -9 3455.02 826.579
  -4  17  -9 3069.32 641.401
   4 -17   9 4786.52 1041.57
 -17  13   9 3103.52 852.627
  -4  17  -9 3219.14 893.335
  13   4   9 5370.99 1028.40
  -4  17  -6 6331.85 697.576
   4 -17   6 6495.20 1073.34
  -4  17  -6 5830.06 1011.56
 -17  13   6 5315.26 975.413
  13   4   6 5333.99 873.072
 -13  -4  -6 6865.84 1031.81
  17 -13  -6 7075.69 924.198
  13   4   3 5133.50 766.174
  -4  17  -3 5450.96 847.100
  13   4   3 4787.08 493.620
 -17  13   3 5110.86 565.280
  17 -13  -3 3518.51 488.506
   4 -17   3 4254.67 733.199
 -13  -4  -3 5164.70 491.901
 -17  13   3 4695.46 834.381
  17 -13  -3 4323.99 588.034
   4 -17   3 4209.93 422.916
 -13  -4  -3 3451.67 711.786
  -4  17  -3 5028.81 437.514
   4 -17   0 455.522 350.261
 -13  -4   0 593.782 380.790
  -4  17   0 556.820 203.568
  -4  17   0 190.756 194.961
 -17  13   0 448.066 286.090
 -17  13   0 183.432 268.364
 -13  -4   0 342.527 237.172
  13   4   0 371.676 177.981
  -4  17   0 586.751 166.001
  17 -13   0 348.692 178.940
 -13  -4   3 6924.70 943.077
  13   4  -3 8687.32 929.552
 -13  -4   3 9447.92 1105.93
  17 -13   3 6284.40 610.868
  -4  17   3 6549.82 843.802
  -4  17   3 5866.00 671.330
 -17  13  -3 7547.11 955.198
 -17  13  -3 6219.45 891.541
  -4  17   3 6203.51 649.720
   4 -17  -6 4971.50 846.302
  17 -13   6 4381.10 646.163
 -13  -4   6 4449.23 892.333
  13   4  -6 5239.57 822.992
  -4  17   6 4236.81 507.704
 -17  13  -6 5648.19 837.128
  -4  17   6 5962.45 798.978
 -17  13  -6 6552.51 1067.95
  13   4  -6 6492.01 905.038
   4 -17  -9 4864.36 970.655
  13   4  -9 4689.34 837.398
 -17  13  -9 5915.06 1140.01
  13   4  -9 6189.86 1054.65
 -12  -5 -10 345.929 434.960
  17 -12 -10 16.3813 437.566
   5 -17  10 1050.82 481.024
  -5  17 -10 1202.42 622.722
  12   5   7 172.446 340.662
 -12  -5  -7 426.170 319.815
  17 -12  -7-73.8576 278.247
 -17  12   7 842.104 521.176
  -5  17  -7-177.049 257.767
   5 -17   7 1096.30 526.226
  -5  17  -7 904.757 498.026
  -5  17  -4 4942.05 460.210
  12   5   4 3698.14 258.877
  -5  17  -4 4972.27 835.248
   5 -17   4 5321.18 888.295
  17 -12  -4 5498.13 558.983
  12   5   4 5908.71 845.673
   5 -17   4 4387.09 432.839
 -12  -5  -4 5939.36 927.490
 -17  12   4 3745.79 737.570
 -17  12   4 4512.94 494.666
  17 -12  -4 4030.75 595.114
 -17  12   1 109.214 155.546
 -12  -5  -1-160.670 284.068
  -5  17  -1 1.84009 83.9574
  -5  17  -1-296.687 292.935
   5 -17   1-154.509 184.790
 -17  12   1 210.198 375.173
  12   5   1-105.814 193.499
 -12  -5  -1 184.651 192.897
  -5  17  -1 30.6635 58.8757
  17 -12  -1 241.083 170.791
  -5  17   2 30140.8 1269.06
 -12  -5   2 26906.2 1798.29
 -12  -5   2 31022.8 1850.08
  -5  17   2 30274.4 1494.72
 -17  12  -2 30776.5 1853.35
 -17  12  -2 30304.8 1904.29
  -5  17   2 31661.1 1233.94
  17 -12   2 29406.8 1282.41
  12   5  -2 29097.8 1637.83
 -17  12  -5 749.123 413.262
 -12  -5   5 2235.89 581.573
   5 -17  -5 2115.58 509.303
  -5  17   5 2404.77 372.723
  12   5  -5 2309.34 556.615
 -17  12  -5 1504.08 482.946
  -5  17   5 1959.54 483.915
  17 -12   5 2770.47 505.221
  12   5  -5 3388.17 630.140
 -12  -5   8 1173.40 572.893
  12   5  -8 1397.20 515.313
  17 -12   8 91.7423 261.891
   5 -17  -8 1120.46 532.516
  12   5  -8 228.718 247.186
 -17  12  -8 73.1163 276.413
 -17  12  -8 232.731 503.609
  -5  17   8 367.295 358.354
  17 -11  -8 17779.1 1596.05
   6 -17   8 17158.9 1747.02
  -6  17  -8 19091.9 1883.22
  11   6   8 16079.5 1655.61
 -17  11   8 15035.4 1694.37
 -11  -6  -8 17765.0 1710.56
 -17  11   5 949.081 488.648
 -11  -6  -5 1620.56 515.733
 -17  11   5 1782.20 298.659
  -6  17  -5 1350.78 286.919
  -6  17  -5 1962.62 636.082
  11   6   5 1918.69 530.328
   6 -17   5 1812.16 600.238
  17 -11  -5 2542.41 555.561
  -6  17  -2 7290.54 377.559
 -11  -6  -2 8954.94 1083.91
  -6  17  -2 8519.96 978.404
 -17  11   2 9021.55 1133.21
   6 -17   2 9138.22 1047.22
 -11  -6  -2 7982.40 686.221
  11   6   2 7693.76 700.719
 -17  11   2 8542.97 810.105
  11   6   2 7606.62 854.906
  17 -11  -2 7988.23 757.266
  -6  17   1 997.676 188.014
  -6  17   1 1326.74 233.753
 -11  -6   1 868.674 419.245
  -6  17   1 591.882 266.800
  17 -11   1 762.660 234.307
 -17  11  -1 1605.02 478.161
 -17  11  -1 1007.95 373.368
 -11  -6   1 1118.61 363.179
  11   6  -1 1369.13 411.814
   6 -17  -1 1098.53 407.438
   6 -17  -4 4053.92 608.493
  11   6  -4 4470.63 685.187
 -11  -6   4 4459.54 796.381
  -6  17   4 4340.97 517.880
 -11  -6   4 4677.13 843.709
  17 -11   4 3916.11 569.645
  -6  17   4 4350.75 722.932
 -17  11  -4 3204.30 607.386
 -17  11  -4 3409.00 697.095
  11   6  -7 54.9317 244.036
  17 -11   7 107.106 260.177
   6 -17  -7 4.39397 295.934
  11   6  -7 28.6151 299.170
 -17  11  -7 200.639 256.153
  -6  17   7 331.686 304.754
 -17  11  -7-46.6100 364.627
 -11  -6   7-143.632 405.647
 -11  -6  10 1139.56 617.119
  11   6 -10 224.989 427.891
   6 -17 -10 323.035 484.197
 -17  11 -10-9.99735 336.968
  11   6 -10 678.548 411.760
 -17  11 -10 1666.80 858.562
 -10  -7  -9 2743.30 714.808
  17 -10  -9 2191.56 644.677
  -7  17  -9 2403.82 590.265
 -10  -7  -9 2932.46 912.243
 -17  10   9 3119.82 882.319
  -7  17  -9 2282.20 696.841
   7 -17   9 2310.74 725.284
  -7  17  -6 29229.6 1363.42
  17 -10  -6 28275.5 997.650
  -7  17  -6 29121.9 2091.70
   7 -17   6 31425.2 2195.04
  10   7   6 28888.4 1960.76
 -17  10   6 27260.0 2123.35
 -10  -7  -6 33202.6 2138.89
  17 -10  -6 32326.9 1939.15
   7 -17   3 4142.48 253.863
 -10  -7  -3 5800.16 499.799
   7 -17   3 6051.29 925.449
  -7  17  -3 5896.91 848.289
 -17  10   3 5247.83 862.028
  10   7   3 4704.93 458.233
  10   7   3 6536.48 840.327
  17 -10  -3 5199.54 659.272
 -17  10   3 6382.01 685.420
 -10  -7  -3 5965.95 885.085
 -10  -7   0 39352.2 2145.01
 -17  10   0 36422.3 1848.94
  -7  17   0 42735.6 1923.17
 -10  -7   0 40770.9 1855.19
 -17  10   0 41758.1 2178.52
   7 -17   0 39533.7 2102.79
  10   7   0 38528.3 1802.90
  17 -10   0 38040.7 1564.83
  -7  17   0 32672.7 620.237
  -7  17   3 4991.45 541.152
 -10  -7   3 5239.09 808.638
   7 -17  -3 5261.11 602.849
  -7  17   3 3269.28 636.948
  -7  17   3 3698.97 494.300
  17 -10   3 3489.63 503.280
 -10  -7   3 5359.82 829.878
 -17  10  -3 4200.51 661.780
 -17  10  -3 4813.74 804.015
  10   7  -3 5930.08 740.309
  -7  17   6 2572.59 584.284
   7 -17  -6 2819.25 604.261
 -17  10  -6 3236.14 598.194
  10   7  -6 2826.65 617.937
 -17  10  -6 2363.68 670.754
 -10  -7   6 2973.56 735.850
  10   7  -6 2910.47 605.125
  17 -10   6 4240.04 659.749
 -10  -7   9-215.484 483.808
  10   7  -9-126.810 276.819
   7 -17  -9 313.134 456.481
 -17  10  -9 354.646 582.898
  10   7  -9-93.8951 315.291
  -7  17   9-17.0376 278.035
  -9  -8 -10 12.6288 373.204
  -9  -8 -10 624.994 711.731
 -17   9  10 1050.28 600.076
  -8  17 -10 731.141 563.631
   8 -17  10 2005.08 716.448
  -8  17  -7 12667.9 1002.70
  17  -9  -7 11553.5 1262.58
  -8  17  -7 11210.3 1404.32
   9   8   7 13022.5 1391.10
 -17   9   7 10071.5 1358.22
  -9  -8  -7 10859.6 1261.66
  17  -9  -4 147.907 255.874
 -17   9   4 125.230 270.507
  -9  -8  -4 34.2444 80.5353
  -9  -8  -4 567.019 336.947
 -17   9   4 235.959 234.605
   9   8   4-14.5962 269.149
   8 -17   4-94.9958 269.671
   9   8   4 107.015 90.3477
  -8  17  -4 157.000 258.749
  17  -9  -4 146.362 216.011
   8 -17   4 110.347 86.5059
  -9  -8  -1 6948.02 913.060
   8 -17   1 6841.91 879.604
  -8  17  -1 7813.74 868.234
   9   8   1 6243.30 748.524
 -17   9   1 5716.09 839.004
 -17   9   1 7220.01 794.742
  -9  -8  -1 5917.15 663.610
  17  -9  -1 7425.44 731.697
   8 -17  -2 26065.8 1081.98
  -8  17   2 23753.0 1652.92
  17  -9   2 27275.5 1410.61
  -8  17   2 22858.4 1243.09
 -17   9  -2 22045.7 1505.56
  -9  -8   2 27665.6 1737.06
 -17   9  -2 23519.8 1658.88
  -9  -8   2 25048.1 1733.76
   9   8  -2 29554.3 1557.03
  -8  17   2 22970.4 921.152
   8 -17  -5 2260.53 502.643
   9   8  -5 3004.09 623.797
 -17   9  -5 3780.62 606.801
  17  -9   5 2896.23 562.836
  -8  17   5 2581.16 322.079
  -8  17   5 2755.46 613.370
  -9  -8   5 4547.69 835.897
 -17   9  -5 3803.32 840.019
   9   8  -5 3499.59 630.773
  -9  -8   8 2177.51 710.428
   8 -17  -8 2889.19 704.785
  17  -9   8 2301.26 614.889
   9   8  -8 2752.50 685.912
 -17   9  -8 2512.19 729.161
   9   8  -8 2601.40 636.539
  -9  17  -8 6340.79 799.463
  -8  -9  -8 4639.30 975.211
  -8  -9  -8 5531.03 900.668
  -9  17  -8 5690.84 1106.96
   9 -17   8 6736.35 1117.75
 -17   8   8 6496.87 1168.71
  17  -8  -8 5496.12 954.375
  17  -8  -5 180.037 230.345
 -17   8   5 216.263 349.597
  -8  -9  -5-2.71000 218.134
  -9  17  -5 4.72831 119.805
 -17   8   5 100.818 148.669
   9 -17   5 326.090 295.768
  -9  17  -5 533.703 410.417
   8   9   5-47.0579 202.231
  -8  -9  -2 5346.75 796.434
  -8  -9  -2 6364.08 642.703
   9 -17   2 2954.33 624.693
  -9  17  -2 6436.16 852.895
 -17   8   2 5991.01 886.922
   8   9   2 5792.68 725.760
 -17   8   2 5086.14 669.010
  17  -8  -2 5258.70 672.957
   8   9   2 5719.13 620.209
 -17   8  -1 4697.14 728.301
  -8  -9   1 4942.67 795.227
  -9  17   1 6741.50 886.782
  -9  17   1 4966.74 624.798
   8   9  -1 5617.93 687.610
 -17   8  -1 4153.15 679.372
  -8  -9   1 5773.91 788.332
  -9  17   1 4835.57 298.587
  17  -8   1 5285.62 635.741
  -9  17   1 4937.50 296.571
   8   9  -4 32035.1 1905.70
   9 -17  -4 33404.5 1570.68
  -9  17   4 30186.0 1905.05
  -9  17   4 33862.1 1220.66
 -17   8  -4 31230.8 1629.32
  -8  -9   4 34581.9 2134.74
 -17   8  -4 35002.1 2196.28
  17  -8   4 33286.1 1743.65
   8   9  -4 30043.1 1668.15
  -9  17   4 31000.8 1206.63
   9 -17  -7 5992.48 899.027
  17  -8   7 4814.03 802.823
   8   9  -7 4661.49 825.952
 -17   8  -7 4469.89 608.152
  -8  -9   7 4545.00 951.312
  -9  17   7 4642.36 823.738
 -17   8  -7 4030.62 898.805
   8   9  -7 3791.59 716.676
 -17   8 -10 55.9372 664.270
   8   9 -10 102.669 335.565
  -8  -9  10-113.421 364.404
   9 -17 -10 765.957 485.819
   8   9 -10-182.966 382.587
  17  -7  -9 1986.91 656.090
  -7 -10  -9 1997.17 605.381
  -7 -10  -9 3696.91 904.498
  10 -17   9 3207.35 824.882
 -17   7   9 2902.78 867.873
 -10  17  -9 2866.14 926.077
 -10  17  -6 24772.5 1220.51
 -10  17  -6 29469.9 2156.47
   7  10   6 24567.8 1797.29
  10 -17   6 26897.0 1996.69
 -17   7   6 24907.1 2030.63
  17  -7  -6 22079.7 1656.00
  -7 -10  -6 24572.5 1776.98
   7  10   3 59817.2 1797.97
  10 -17   3 53103.3 2565.31
 -10  17  -3 68621.5 2813.13
  -7 -10  -3 59783.3 2653.88
  -7 -10  -3 68378.0 1844.47
   7  10   3 70359.3 2618.02
 -17   7   3 67592.7 2958.21
  17  -7  -3 57994.5 2279.75
 -17   7   3 57630.0 2181.00
  -7 -10   0 13075.6 1263.42
 -10  17   0 12374.1 1213.67
 -10  17   0 13132.6 1056.22
   7  10   0 14004.3 1045.29
 -17   7   0 12729.6 1151.11
  17  -7   0 15181.7 1086.42
 -17   7   0 14271.4 1234.40
  -7 -10   0 13001.3 1061.15
 -10  17   3 2767.21 406.917
  10 -17  -3 3439.88 455.910
   7  10  -3 2654.32 574.545
 -10  17   3 5080.67 817.994
 -10  17   3 3935.45 462.924
 -17   7  -3 2643.97 515.957
  -7 -10   3 3369.06 670.941
 -17   7  -3 3331.02 707.052
  17  -7   3 4230.26 624.385
   7  10  -3 3234.62 539.301
 -10  17   3 3842.66 446.500
  10 -17  -6 3555.32 636.898
  -7 -10   6 3434.43 765.138
 -17   7  -6 4319.61 894.330
   7  10  -6 3766.09 724.995
 -17   7  -6 4802.94 589.020
 -10  17   6 4142.72 766.728
   7  10  -6 4059.03 670.984
  17  -7   6 3426.54 653.363
 -10  17   9 1316.43 579.233
   7  10  -9 909.383 450.134
  10 -17  -9 796.858 522.561
  -7 -10   9 2088.75 789.659
   7  10  -9 317.204 343.278
 -17   7  -9 623.363 453.996
  17  -7   9 521.953 297.202
  17  -6 -10 3426.26 878.808
  -6 -11 -10 1989.24 803.633
 -17   6  10 2916.17 899.594
  11 -17  10 2670.10 795.034
 -11  17 -10 2564.44 881.535
 -11  17  -7 6674.56 760.133
  17  -6  -7 8899.31 764.564
  -6 -11  -7 6489.17 1089.96
 -11  17  -7 8896.56 1254.18
  11 -17   7 7042.45 1055.57
  17  -6  -7 6893.13 1018.63
 -17   6   7 8136.04 1219.74
  -6 -11  -7 6090.12 898.689
  -6 -11  -4 6300.80 888.980
 -17   6   4 5995.34 719.937
   6  11   4 5475.29 508.348
  11 -17   4 6218.93 928.506
  17  -6  -4 4527.76 706.610
 -11  17  -4 4183.73 779.126
   6  11   4 4894.47 714.313
 -17   6   4 5912.45 906.203
  11 -17   4 4110.74 257.743
  -6 -11  -1 26379.7 1437.51
  11 -17   1 23594.6 1657.19
  -6 -11  -1 26434.6 1762.27
 -11  17  -1 27785.7 1619.01
 -17   6   1 28540.3 1798.93
   6  11   1 25357.0 1420.28
  17  -6  -1 29235.7 1531.53
 -17   6   1 28917.8 1678.40
  11 -17  -2 16742.6 804.228
   6  11  -2 15456.0 1294.42
  11 -17  -2 13398.5 895.505
 -11  17   2 14653.4 1364.31
 -11  17   2 15839.8 1011.79
 -17   6  -2 15752.9 1199.51
  -6 -11   2 18544.3 1430.19
  17  -6   2 16861.8 1191.79
 -17   6  -2 16052.3 1412.81
   6  11  -2 14423.0 1038.31
 -11  17   2 15929.0 718.225
  11 -17  -5 110695. 3151.27
   6  11  -5 105254. 3637.35
 -17   6  -5 104669. 3916.26
 -11  17   5 109864. 3871.24
 -17   6  -5 111119. 2803.25
  -6 -11   5 106914. 3959.68
  17  -6   5 121946. 3663.36
   6  11  -5 118865. 3342.21
  11 -17  -8 9155.02 1165.16
   6  11  -8 7123.95 1092.89
  -6 -11   8 8863.86 1355.23
 -11  17   8 11667.8 1372.70
  17  -6   8 7581.86 1086.49
 -17   6  -8 8206.80 1282.35
   6  11  -8 8605.29 1095.64
 -17   5   8 10515.7 1431.50
  -5 -12  -8 10609.4 1444.97
 -12  17  -8 9398.22 1375.36
  12 -17   8 10555.3 1330.41
  17  -5  -8 10246.6 1268.83
  -5 -12  -8 11633.5 1234.96
  -5 -12  -5 1724.95 505.148
 -12  17  -5 1526.66 292.326
  12 -17   5 1640.28 568.503
 -17   5   5 1282.77 394.602
 -17   5   5 3294.17 728.158
   5  12   5 1672.97 273.687
   5  12   5 2022.09 525.388
 -12  17  -5 1382.99 499.810
  17  -5  -5 1672.86 487.707
  -5 -12  -2 27214.7 1765.09
 -12  17  -2 30846.3 1856.53
  -5 -12  -2 25024.0 1327.31
   5  12   2 27849.3 1542.06
 -17   5   2 26178.9 1772.73
  17  -5  -2 29323.1 1614.53
  12 -17   2 25740.9 1722.72
 -17   5   2 28745.8 1658.54
  -5 -12   1 5337.65 858.740
  17  -5   1 5215.76 675.777
 -12  17   1 6521.97 926.306
 -12  17   1 6441.50 708.692
 -17   5  -1 5213.32 720.016
 -12  17   1 4863.40 294.929
   5  12  -1 5273.48 635.490
 -17   5  -1 6394.88 884.536
  -5 -12   1 6286.05 823.727
 -12  17   4 27704.5 977.918
  12 -17  -4 28972.4 1457.06
   5  12  -4 28875.5 1861.49
 -12  17   4 24380.3 1822.92
 -17   5  -4 27352.0 1388.12
  -5 -12   4 29241.0 1984.75
  17  -5   4 31291.6 1829.13
 -17   5  -4 27714.0 1976.51
   5  12  -4 22110.1 1351.59
   5  12  -7 2523.83 597.176
  12 -17  -7 3133.76 675.978
  -5 -12   7 1526.16 556.309
   5  12  -7 1806.81 579.847
  17  -5   7 3901.06 752.214
 -17   5  -7 2842.75 808.532
 -12  17   7 2884.69 698.868
   5  12 -10 2163.80 650.956
 -12  17  10 2862.38 753.901
  12 -17 -10 3194.63 877.363
  -5 -12  10 3019.82 890.390
   5  12 -10 3370.92 922.134
  17  -5  10 2311.49 797.444
 -17   5 -10 2840.41 942.021
  17  -4  -9 2267.33 732.076
  -4 -13  -9 1910.56 724.947
 -17   4   9 2530.64 834.034
 -13  17  -9 2447.06 804.026
  13 -17   9 1170.26 539.064
  17  -4  -6 632.579 343.520
  -4 -13  -6 479.116 329.516
 -13  17  -6-83.0082 147.109
  13 -17   6 35.8898 330.856
 -17   4   6 336.496 419.477
 -13  17  -6 72.1347 347.588
 -17   4   3 4200.08 650.964
  13 -17   3 2473.78 599.708
  -4 -13  -3 3983.02 696.885
 -17   4   3 2089.07 527.190
  -4 -13  -3 2641.67 446.077
   4  13   3 3180.03 572.143
 -13  17  -3 2412.08 571.343
  17  -4  -3 2807.10 559.259
 -17   4   0 846.462 356.518
 -17   4   0 646.523 383.889
  -4 -13   0 788.256 311.199
  -4 -13   0 746.955 367.115
 -13  17   0 315.587 230.630
 -13  17   0 1016.10 344.181
   4  13   0 452.947 218.311
  17  -4   0 678.208 338.175
 -17   4  -3 617.282 266.909
  13 -17  -3 421.707 168.627
  13 -17  -3 422.970 170.586
   4  13  -3 675.595 336.381
  -4 -13   3 321.399 369.592
  17  -4   3 399.160 261.079
 -13  17   3 165.596 329.251
 -13  17   3 416.711 195.306
 -13  17   3 486.886 191.059
   4  13  -3 500.396 252.282
 -17   4  -3-204.659 261.535
  13 -17  -6 5339.30 765.556
  17  -4   6 5989.87 913.543
   4  13  -6 4415.53 822.072
 -13  17   6 5165.68 938.928
  -4 -13   6 5615.92 1002.03
 -17   4  -6 4976.96 960.261
   4  13  -6 7102.62 858.685
   4  13  -9 222.076 279.459
  13 -17  -9-380.550 326.938
  -4 -13   9 484.061 585.318
   4  13  -9 87.4169 370.241
  17  -4   9 278.644 477.465
 -17   4  -9-540.483 549.151
  14 -17  10 5352.03 1024.74
  -3 -14 -10 5258.74 1163.62
 -17   3  10 3022.31 926.164
  17  -3 -10 5883.08 1144.26
 -17   3   7 6252.21 1152.27
  -3 -14  -7 4540.65 758.758
 -14  17  -7 4700.94 648.475
  -3 -14  -7 4476.45 866.712
  14 -17   7 7263.87 1019.12
  17  -3  -7 4620.90 673.956
 -14  17  -7 5946.83 1084.44
  17  -3  -7 7606.85 1080.63
 -17   3   4 4060.45 688.903
  -3 -14  -4 3230.32 627.436
  14 -17   4 2656.62 577.219
   3  14   4 3322.11 497.182
 -17   3   4 2762.15 698.731
   3  14   4 2267.31 497.083
 -14  17  -4 1798.89 538.541
  14 -17   4 3164.83 284.467
  17  -3  -4 2108.63 511.076
  -3 -14  -1 11933.8 1187.54
 -14  17  -1 14231.0 1369.73
  -3 -14  -1 14321.2 1151.27
 -14  17  -1 15007.5 1254.68
  17  -3  -1 15723.2 1227.44
   3  14   1 13146.9 987.471
 -17   3   1 13557.6 1238.29
 -17   3   1 13452.7 1237.59
 -17   3  -2 113.301 163.433
  14 -17  -2 270.153 151.189
   3  14  -2 13.6458 219.040
 -14  17   2 2.96409 265.676
 -14  17   2 101.520 140.756
 -14  17   2 193.367 140.623
  17  -3   2 54.1371 183.901
  -3 -14   2 103.369 232.105
   3  14  -2-17.5094 156.712
 -17   3  -2 35.0596 243.662
   3  14  -5 1651.01 403.700
  14 -17  -5 2899.56 557.650
 -17   3  -5 1829.79 319.304
   3  14  -5 2815.46 703.380
  17  -3   5 2413.27 549.376
  -3 -14   5 2211.24 646.722
 -14  17   5 2509.19 643.644
 -17   3  -5 1853.90 608.310
 -14  17   8 1978.29 826.170
  14 -17  -8 3420.68 758.592
   3  14  -8 2545.21 740.090
  -3 -14   8 3408.12 877.784
  17  -3   8 1258.28 495.157
 -17   3  -8 3062.93 832.519
  17  -2  -8 4320.62 853.103
  -2 -15  -8 4134.89 721.192
  -2 -15  -8 5841.62 1042.53
 -17   2   8 4727.38 1018.72
 -15  17  -8 4602.67 1030.04
  15 -17   8 3159.55 717.865
  15 -17   5 1674.79 531.748
  -2 -15  -5 1105.91 393.331
 -17   2   5 1089.69 458.468
 -17   2   5 1154.03 571.470
   2  15   5 1723.89 384.108
 -15  17  -5 1129.28 500.310
  15 -17   5 1903.66 301.990
   2  15   5 1807.87 448.525
  17  -2  -5 1757.44 472.864
  -2 -15  -2 15122.5 1320.35
 -15  17  -2 17948.6 1554.28
 -17   2   2 15908.9 1346.99
  -2 -15  -2 16146.6 1201.43
 -15  17  -2 14513.2 1308.23
   2  15   2 16730.5 1144.86
  17  -2  -2 16491.5 1288.23
 -17   2   2 17820.9 1514.36
  17  -2   1 299.721 245.749
  15 -17  -1 329.466 134.052
 -17   2  -1 699.324 320.990
  -2 -15   1-32.2571 216.750
   2  15  -1 687.429 321.934
 -17   2  -1 702.483 399.720
 -15  17   1 201.098 327.144
 -15  17   1 424.779 141.453
 -15  17   1 257.177 223.274
   2  15  -1 106.862 120.779
  17  -2   4 16448.7 1407.22
  15 -17  -4 14469.1 1045.13
  -2 -15   4 18062.6 1633.36
 -17   2  -4 20194.0 1747.27
   2  15  -4 16878.0 1478.69
 -15  17   4 16980.8 1628.02
 -15  17   4 17258.4 770.624
   2  15  -4 17636.8 1164.26
 -17   2  -4 15985.6 946.156
  15 -17  -7 16952.8 1476.90
   2  15  -7 19887.4 1853.92
 -17   2  -7 12523.4 1537.04
 -15  17   7 16103.9 1683.91
  17  -2   7 20433.2 1737.01
  -2 -15   7 20500.0 1963.89
   2  15  -7 14310.4 1245.48
   2  15 -10 2082.28 717.890
 -15  17  10 3148.61 873.677
  15 -17 -10 1473.31 662.205
   2  15 -10 871.642 518.762
  17  -2  10 892.861 471.122
 -17   2 -10 1328.75 724.760
  17  -1  -9 2255.99 712.417
  -1 -16  -9 1578.35 714.919
  16 -17   9 1661.00 606.447
 -16  17  -9 1705.99 783.438
 -17   1   9 794.642 477.409
   1  16   6 1575.06 356.373
  -1 -16  -6 2212.98 549.230
  -1 -16  -6 2073.27 629.713
  17  -1  -6 1241.35 417.610
 -17   1   6 3169.11 810.714
 -16  17  -6 3284.26 787.102
  16 -17   6 1986.59 383.816
  16 -17   6 1974.82 611.825
  17  -1  -6 1808.61 516.407
 -17   1   3 60437.5 2877.07
 -17   1   3 57709.5 2613.09
  -1 -16  -3 62184.9 2682.71
 -16  17  -3 63882.6 2973.89
  -1 -16  -3 57610.4 2192.47
 -16  17  -3 62365.1 2872.75
  16 -17   3 58974.8 1217.60
  17  -1  -3 62075.4 2593.22
   1  16   3 63717.9 2339.94
 -17   1   0 52246.5 2571.05
   1  16   0 48646.3 2275.12
 -16  17   0 43472.9 2502.77
  -1 -16   0 52498.2 2409.23
 -17   1   0 49391.0 2255.81
 -16  17   0 50099.1 2200.13
   1  16   0 54633.6 1842.73
  17  -1   0 50939.3 2274.04
  16 -17   0 45608.3 1127.39
  16 -17  -3 39745.9 1591.90
  -1 -16   3 41663.5 2413.80
   1  16  -3 38810.4 2208.36
  16 -17  -3 36921.0 1378.99
 -16  17   3 41005.6 2496.24
 -16  17   3 39630.5 1497.04
   1  16  -3 39485.8 1593.16
 -17   1  -3 37155.6 2326.54
 -17   1  -3 40831.8 1647.96
  17  -1   3 43658.3 2176.54
   1  16  -6 668.498 292.518
  16 -17  -6 967.785 370.975
  17  -1   6 1762.58 552.911
   1  16  -6 8.73115 262.037
  -1 -16   6 1209.58 574.683
 -16  17   6 501.742 401.998
 -17   1  -6 843.431 458.199
  -1 -16   9 293.027 391.014
 -16  17   9 603.900 571.402
  16 -17  -9 264.128 386.952
  17  -1   9 457.299 374.510
   1  16  -9-142.039 279.232
   1  16  -9-439.709 533.970
 -17   1  -9 316.220 439.890
   0 -17 -10 10435.1 1573.37
 -17   0  10 9749.86 1593.33
 -17  17 -10 10873.4 1685.55
  17   0  -7 2246.62 655.904
   0 -17  -7 3612.35 657.628
   0 -17  -7 857.369 480.182
  17   0  -7 1862.65 514.289
  17 -17   7 2328.35 650.045
 -17   0   7 2773.40 825.833
 -17   0   4 69292.2 3258.77
 -17   0   4 68385.5 2936.71
   0 -17  -4 74658.0 2921.05
 -17  17  -4 70788.6 3186.33
   0  17   4 68989.0 2521.08
  17 -17   4 73037.4 1724.17
 -17  17  -4 70344.5 3269.55
   0  17   4 70072.6 2569.76
  17   0  -4 76632.0 3045.67
 -17  17  -1 974.269 428.102
 -17   0   1 508.489 251.787
  17 -17   1 696.192 181.982
   0  17   1 850.521 379.133
 -17   0   1 882.751 444.687
 -17  17  -1 415.545 322.489
   0 -17  -1 449.397 307.236
   0  17   1 1053.08 290.090
  17   0  -1 735.504 322.235
  17 -17   1 807.401 160.888
 -17   0  -2 5374.87 662.882
   0 -17   2 6309.61 961.023
   0  17  -2 7525.42 971.378
 -17  17   2 6549.51 1011.16
   0  17  -2 5423.65 563.067
 -17  17   2 6768.70 747.600
  17   0   2 5209.73 783.160
 -17   0  -2 7370.47 1053.56
  17 -17  -2 6816.02 613.859
   0 -17   5-159.583 307.143
  17 -17  -5 817.958 321.273
   0  17  -5 320.908 348.660
   0  17  -5-16.5239 187.871
  17   0   5 645.427 406.231
 -17  17   5 96.0620 313.480
  17   0   8 2259.57 703.578
 -17  17   8 1580.32 582.819
   0  17  -8 2365.13 579.857
  17 -17  -8 2440.24 632.699
   0  17  -8 3668.91 904.110
   0 -17   8 2969.34 832.268
 -17   0  -8 1955.41 688.187
 -17  -1  -7 348.523 408.453
  -1  18  -7 1209.75 375.394
   1 -18   7 809.490 484.050
  18 -17  -7 770.689 415.076
 -18  17   7-151.729 396.972
  -1  18  -7 858.089 584.705
  17   1   7 105.130 352.095
 -17  -1  -4 313.894 374.458
  18 -17  -4 34.0949 178.318
  17   1   4 30.8806 217.014
   1 -18   4-172.370 309.469
  -1  18  -4-195.336 361.659
  -1  18  -4 73.1391 127.302
 -18  17   4 225.815 277.838
 -17  -1  -4-119.621 130.656
 -18  17   4 91.7652 146.211
 -17  -1  -1 2771.09 527.997
  -1  18  -1 3830.50 718.358
 -18  17   1 5736.78 978.911
  17   1   1 3472.35 665.438
   1 -18   1 3150.60 686.564
 -18  17   1 4203.02 693.818
  -1  18  -1 4230.82 483.713
 -17  -1  -1 4744.81 859.014
  18 -17  -1 4142.95 455.827
 -17  -1   2 19560.2 1622.46
 -17  -1   2 20186.5 1640.92
  -1  18   2 20316.7 1439.63
 -18  17  -2 21323.7 1777.35
   1 -18  -2 20292.0 1483.91
 -18  17  -2 17666.4 1509.72
  -1  18   2 19261.9 1164.32
  17   1  -2 17300.2 1383.81
  18 -17   2 18124.6 800.709
 -17  -1   5 11234.0 1411.58
 -17  -1   5 13468.2 1359.50
  -1  18   5 12428.0 1098.25
 -18  17  -5 11253.6 1277.58
  -1  18   5 11766.4 1104.10
  18 -17   5 10145.4 761.092
 -18  17  -5 11976.9 1458.26
  -1  18   5 12088.9 1166.75
  17   1  -5 10873.2 1209.48
  17   1  -8 1731.74 598.583
   1 -18  -8 1826.17 630.227
 -18  17  -8 1642.12 586.163
  17   1  -8 1776.51 537.529
 -17  -1   8 1222.65 624.742
 -18  17  -8 1554.55 666.162
 -16  -2  -8 1151.09 618.042
 -18  16   8 1716.70 772.243
  18 -16  -8 926.181 467.992
   2 -18   8 2351.66 731.864
  -2  18  -8 1326.31 456.523
  -2  18  -8 657.866 538.255
  16   2   8 935.094 423.735
 -16  -2  -5 165.195 408.920
  -2  18  -5 25.9613 152.836
  18 -16  -5 96.7177 230.543
   2 -18   5 202.661 319.281
  16   2   5-180.460 318.072
  -2  18  -5 393.612 282.799
 -18  16   5 366.294 370.303
 -16  -2  -2 24580.0 1362.27
  16   2   2 24533.9 1666.01
  -2  18  -2 23798.6 1725.85
 -18  16   2 26619.0 2032.57
   2 -18   2 22463.4 1746.82
 -18  16   2 27677.1 1488.77
  -2  18  -2 26443.6 1131.21
 -16  -2  -2 28250.9 2011.77
  18 -16  -2 27330.4 1308.38
 -16  -2   1-24.7805 321.724
   2 -18  -1 1042.35 444.051
  18 -16   1 604.451 254.921
  -2  18   1 549.787 283.750
 -16  -2   1 479.041 274.356
 -18  16  -1 743.593 377.661
 -18  16  -1 614.046 344.073
  -2  18   1 488.907 183.457
  16   2  -1 541.393 283.352
  18 -16   1 348.912 155.132
 -16  -2   4 2115.98 537.886
  -2  18   4 2548.48 507.754
  -2  18   4 2192.04 515.820
 -18  16  -4 1372.89 588.071
 -16  -2   4 2044.17 640.634
  -2  18   4 2533.00 484.708
 -18  16  -4 2187.19 625.546
  18 -16   4 1714.00 330.104
  16   2  -4 2161.58 532.023
  16   2  -7-89.5115 268.429
   2 -18  -7 846.469 441.990
  16   2  -7 504.372 324.148
  18 -16   7 876.401 364.437
 -18  16  -7 709.957 386.605
 -18  16  -7-21.6915 453.389
 -16  -2   7 915.378 593.252
   2 -18 -10 4634.96 1146.72
 -18  16 -10 3520.27 1101.94
 -16  -2  10 4770.96 1210.32
  16   2 -10 5107.85 1064.19
 -15  -3  -9 424.445 540.074
  18 -15  -9-92.0140 393.320
 -18  15   9 967.241 642.750
   3 -18   9-273.740 489.228
  -3  18  -9 485.590 544.926
  15   3   9 747.473 646.164
 -15  -3  -6 844.828 453.398
  18 -15  -6 834.040 385.300
  -3  18  -6 1420.62 407.791
   3 -18   6 1181.52 461.643
  -3  18  -6 2371.57 705.260
  15   3   6 1560.68 542.898
 -18  15   6 938.698 523.643
  15   3   3 2997.36 632.620
 -18  15   3 4794.17 586.436
  -3  18  -3 4210.56 766.889
 -15  -3  -3 3201.18 433.692
   3 -18   3 4082.70 795.508
 -18  15   3 3687.21 789.078
 -15  -3  -3 4423.75 850.986
  -3  18  -3 4192.51 458.345
  18 -15  -3 3145.18 498.166
 -15  -3   0-118.440 286.357
  -3  18   0-148.659 173.325
  -3  18   0 314.612 251.729
 -15  -3   0-103.817 224.674
 -18  15   0 148.850 365.228
 -18  15   0 202.886 282.693
   3 -18   0 279.697 371.895
  -3  18   0 139.776 142.481
  15   3   0 176.894 297.382
  18 -15   0 103.275 121.612
 -15  -3   3 41844.5 2337.89
 -15  -3   3 35315.3 2188.75
  -3  18   3 40483.8 2089.95
  -3  18   3 42328.7 1900.96
 -18  15  -3 38921.7 2284.30
  15   3  -3 39162.1 2071.95
 -18  15  -3 36682.6 2260.76
  -3  18   3 41185.7 1717.42
  18 -15   3 39374.8 1420.97
   3 -18  -6 1567.57 483.082
  15   3  -6 1688.90 482.900
  -3  18   6 1242.61 311.615
 -18  15  -6 1939.44 577.155
 -15  -3   6 2319.46 682.878
  -3  18   6 1708.65 449.533
 -18  15  -6 1344.42 526.157
  18 -15   6 967.133 330.155
  15   3  -6 1627.74 570.049
   3 -18  -9 6310.88 1206.09
 -15  -3   9 7211.34 1318.85
  15   3  -9 7644.87 1087.94
 -18  15  -9 10680.4 1578.85
  18 -15   9 8774.52 1083.49
  15   3  -9 6857.55 1147.97
 -14  -4 -10 321.609 535.013
  18 -14 -10-246.509 410.478
 -18  14  10-504.052 569.852
   4 -18  10 519.283 641.071
  14   4  10 1319.73 699.865
  -4  18 -10 284.906 521.376
  18 -14  -7 11669.3 1235.01
  -4  18  -7 11351.9 1011.87
   4 -18   7 9393.57 1335.34
  -4  18  -7 10334.3 1421.76
  14   4   7 10327.8 1298.95
 -18  14   7 11936.9 1505.66
 -14  -4  -7 10859.7 1388.57
  18 -14  -4 576.060 272.874
 -18  14   4 788.506 249.487
 -14  -4  -4 537.875 370.096
  -4  18  -4 559.890 224.972
  14   4   4 432.496 330.010
  -4  18  -4 428.749 366.567
   4 -18   4 1.63542 368.610
 -18  14   4 108.578 326.017
  -4  18  -1 18671.5 913.694
 -14  -4  -1 20407.5 1284.53
  -4  18  -1 17085.9 1370.11
 -18  14   1 19116.1 1650.54
 -18  14   1 17571.4 1275.37
  14   4   1 18795.2 1400.03
  -4  18  -1 18706.5 782.205
  18 -14  -1 19823.7 1088.24
   4 -18   1 19213.7 1556.03
 -14  -4  -1 17894.4 1577.67
   4 -18  -2 1037.93 408.210
 -14  -4   2 763.747 415.627
  -4  18   2 600.169 224.851
  -4  18   2 592.075 229.779
 -18  14  -2 902.779 395.855
 -14  -4   2 674.622 340.952
 -18  14  -2 346.955 366.964
  18 -14   2 668.108 216.686
  14   4  -2 894.308 372.335
  18 -14   5 2901.89 487.998
   4 -18  -5 4433.75 727.207
  14   4  -5 3657.31 690.919
  -4  18   5 4307.33 568.883
  -4  18   5 3904.55 689.387
 -18  14  -5 3350.54 686.911
 -14  -4   5 3661.90 760.203
 -18  14  -5 2588.46 696.383
  14   4  -5 5464.61 848.100
   4 -18  -8 7567.10 1161.81
 -14  -4   8 7383.01 1300.67
  14   4  -8 6674.41 954.101
 -18  14  -8 6414.06 1170.57
  18 -14   8 9324.46 1058.64
  14   4  -8 6246.72 1025.82
  18 -13  -8 5600.62 953.896
 -13  -5  -8 4358.50 913.175
   5 -18   8 7015.91 1190.62
  -5  18  -8 6606.87 1128.19
 -18  13   8 7590.25 1238.81
  13   5   8 6868.18 1147.55
 -13  -5  -5 681.667 437.350
  -5  18  -5 1214.15 289.093
 -18  13   5 1039.77 222.002
  18 -13  -5 947.050 338.716
  13   5   5 688.409 363.694
  -5  18  -5 962.294 404.636
   5 -18   5 53.0933 324.782
 -18  13   5 1267.24 539.373
 -13  -5  -2 2813.64 659.140
  -5  18  -2 1895.45 271.753
   5 -18   2 1990.63 542.136
  -5  18  -2 2569.74 572.431
 -13  -5  -2 2467.60 406.131
  13   5   2 2594.78 449.369
  18 -13  -2 1933.99 404.932
 -18  13   2 1455.44 517.339
 -18  13   2 2339.72 454.867
  -5  18  -2 2044.81 243.481
  13   5   2 2327.20 506.441
  -5  18   1 3259.04 398.884
 -13  -5   1 3639.28 668.778
  -5  18   1 3671.83 593.510
 -18  13  -1 3139.79 649.950
   5 -18  -1 3442.69 666.650
 -18  13  -1 4915.64 769.067
  13   5  -1 3365.89 590.664
  18 -13   1 4730.50 523.609
  -5  18   1 3731.52 383.417
 -13  -5   1 3741.06 737.794
 -13  -5   4 19444.5 1607.04
   5 -18  -4 19524.7 1354.12
 -13  -5   4 18510.2 1619.67
  -5  18   4 19892.6 1176.89
  -5  18   4 17712.4 1419.27
 -18  13  -4 18447.7 1513.73
 -18  13  -4 20738.4 1749.99
  18 -13   4 19946.8 1181.29
  13   5  -4 19522.7 1478.04
  13   5  -7 2792.15 714.524
   5 -18  -7 2760.48 666.770
  13   5  -7 2035.84 565.758
 -18  13  -7 3351.48 645.105
  -5  18   7 2992.84 620.048
  18 -13   7 1761.06 478.712
 -18  13  -7 3124.33 839.844
 -13  -5   7 2051.46 722.332
  13   5 -10 237.975 375.354
   5 -18 -10-267.072 403.027
  18 -13  10 177.609 360.756
 -18  13 -10 617.983 592.195
 -13  -5  10 548.931 700.460
 -12  -6  -9 190.367 367.172
  18 -12  -9-26.2006 294.921
 -18  12   9 327.590 565.617
   6 -18   9 276.764 491.449
  -6  18  -9 595.258 507.058
  12   6   9 206.210 373.668
  -6  18  -6 16549.0 1058.54
  -6  18  -6 18853.0 1782.42
   6 -18   6 19190.4 1767.61
  12   6   6 16392.3 1536.31
 -18  12   6 16073.0 1684.85
 -12  -6  -6 16262.2 1628.80
  18 -12  -6 16900.0 1421.55
  -6  18  -3 19167.7 1564.45
  12   6   3 15467.0 884.265
 -18  12   3 18174.9 1650.81
   6 -18   3 17452.2 1528.92
   6 -18   3 16610.9 641.540
  12   6   3 20004.0 1505.21
 -18  12   3 17747.4 1119.84
 -12  -6  -3 16615.2 876.243
  18 -12  -3 19556.2 1261.68
 -12  -6  -3 18491.5 1584.64
 -12  -6   0 318.009 333.406
  12   6   0 1173.14 382.600
  -6  18   0 904.820 386.902
   6 -18   0 785.969 390.157
 -18  12   0 1170.11 434.936
 -18  12   0 1532.24 438.830
  18 -12   0 959.827 280.909
 -12  -6   0 608.671 308.369
 -12  -6   3 22162.6 1721.25
   6 -18  -3 24695.7 1323.25
  -6  18   3 23294.8 1627.14
 -12  -6   3 23162.6 1717.86
  -6  18   3 20914.8 1234.01
 -18  12  -3 22348.2 1594.32
 -18  12  -3 24391.1 1825.62
  18 -12   3 22100.0 1233.41
  12   6  -3 21598.3 1478.26
   6 -18  -6 18090.1 1487.95
  12   6  -6 17382.2 1471.06
 -18  12  -6 21611.0 1568.67
 -12  -6   6 18524.5 1768.40
  -6  18   6 20554.4 1572.09
 -18  12  -6 20629.8 1937.90
  18 -12   6 19223.9 1390.38
  12   6  -6 20119.8 1582.40
   6 -18  -9 2299.72 768.877
  12   6  -9 2716.98 726.022
  12   6  -9 3748.12 777.515
 -12  -6   9 3399.45 950.398
  18 -12   9 1837.20 590.050
  18 -11 -10 1315.28 596.976
 -18  11  10 1202.33 743.269
  -7  18 -10 1769.96 816.437
   7 -18  10 730.173 505.063
  18 -11  -7 1528.07 542.257
 -11  -7  -7 1982.37 587.974
 -18  11   7 3463.92 858.453
  -7  18  -7 2428.84 463.942
   7 -18   7 2372.60 678.967
  -7  18  -7 2010.83 567.187
  11   7   7 3936.47 813.801
  -7  18  -4 46195.0 1208.55
  -7  18  -4 48849.7 2573.20
   7 -18   4 56052.9 2828.66
 -18  11   4 50285.5 2762.53
  11   7   4 46950.0 2372.23
  18 -11  -4 48599.7 2135.81
 -11  -7  -4 50638.9 2622.59
 -18  11   4 49204.5 1764.65
 -18  11   1 2885.74 563.230
 -11  -7  -1 1960.90 392.110
 -11  -7  -1 1575.47 508.406
   7 -18   1 2754.67 604.852
  -7  18  -1 2419.71 529.920
  11   7   1 2969.91 566.539
 -18  11   1 2969.38 639.076
  18 -11  -1 1528.80 377.953
  -7  18   2 68013.4 1703.98
 -11  -7   2 71169.7 3047.20
  18 -11   2 71837.5 2196.84
  -7  18   2 75945.8 2988.57
  -7  18   2 81899.9 2486.25
 -11  -7   2 78367.8 2983.53
 -18  11  -2 71359.6 2824.71
 -18  11  -2 80851.8 3123.20
  -7  18   2 74422.2 1780.38
  11   7  -2 80326.1 2714.33
   7 -18  -5 3641.77 631.028
  11   7  -5 3933.85 713.181
  -7  18   5 3632.65 436.786
 -18  11  -5 3850.12 659.940
  -7  18   5 5387.36 829.809
 -18  11  -5 3776.81 846.286
  18 -11   5 5025.25 709.043
 -11  -7   5 2208.78 629.439
  11   7  -5 2943.86 602.478
  11   7  -8 360.318 334.521
   7 -18  -8-112.279 392.197
  11   7  -8-4.76829 378.900
  18 -11   8 286.670 287.045
 -18  11  -8 547.036 398.219
  -7  18   8 501.634 407.061
 -11  -7   8 263.699 392.493
  18 -10  -8-156.173 291.221
 -10  -8  -8-466.356 382.827
 -18  10   8-26.0497 360.951
  10   8   8 193.349 335.150
  -8  18  -8-629.070 518.295
   8 -18   8 77.5639 354.060
 -18  10   5 49949.3 1730.47
  -8  18  -5 47955.5 1443.32
  -8  18  -5 47284.9 2656.52
   8 -18   5 50787.5 2747.64
  10   8   5 44850.8 2380.48
 -18  10   5 47213.6 2719.90
 -10  -8  -5 46679.1 2535.49
  18 -10  -5 50091.7 2337.43
 -10  -8  -2 33736.8 2061.15
 -10  -8  -2 35005.1 1488.68
   8 -18   2 33092.4 2066.44
  10   8   2 35366.8 1545.52
  -8  18  -2 36430.5 2016.30
 -18  10   2 32536.9 2115.06
  10   8   2 32840.0 1785.60
 -18  10   2 34731.9 1714.66
  18 -10  -2 36076.4 1698.54
 -10  -8   1-108.228 235.820
 -10  -8   1 863.057 417.042
  -8  18   1 287.046 92.5705
  -8  18   1-107.997 187.404
 -18  10  -1 288.503 295.618
 -18  10  -1 123.832 217.063
  -8  18   1 219.168 266.385
  18 -10   1 465.161 230.050
  10   8  -1 11.0053 239.008
   8 -18  -4 464.510 209.790
  10   8  -4 1535.40 478.099
  18 -10   4 332.672 232.027
  -8  18   4 759.673 227.089
  -8  18   4 487.630 353.973
 -18  10  -4 1615.75 463.454
 -18  10  -4 1942.58 617.565
  10   8  -4 547.547 293.682
 -10  -8   4 460.591 366.762
   8 -18  -7 6427.30 930.264
  10   8  -7 5568.63 893.727
 -18  10  -7 5962.91 794.682
 -10  -8   7 6808.13 1145.62
  -8  18   7 8627.32 1109.89
 -18  10  -7 7282.75 1221.23
  18 -10   7 5392.70 828.782
  10   8  -7 7368.68 1030.43
  10   8 -10 2504.41 777.542
   8 -18 -10 2720.07 889.593
  10   8 -10 2251.95 713.668
  18 -10  10 1919.64 617.469
 -18  10 -10 2962.03 957.451
  18  -9  -9 593.945 431.855
  -9  -9  -9 1609.34 650.346
   9 -18   9 1181.59 600.321
  -9  -9  -9 1257.81 640.657
 -18   9   9 1396.03 616.292
  -9  18  -9 1151.21 589.805
  -9  -9  -6 2821.68 689.480
 -18   9   6 3165.66 806.778
   9 -18   6 2088.67 582.342
  -9  18  -6 3398.31 816.359
   9   9   6 3880.91 744.226
  -9  18  -6 2909.39 427.523
  18  -9  -6 3250.96 697.940
 -18   9   3 498.999 374.398
 -18   9   3 1372.55 372.613
  -9  -9  -3 245.274 283.081
   9   9   3 1266.37 296.355
  -9  18  -3 941.665 406.978
  -9  -9  -3 973.707 237.457
   9   9   3 1089.03 388.529
   9 -18   3 1007.24 457.305
  18  -9  -3 969.491 352.427
  -9  -9   0 795.095 386.395
   9   9   0 1247.63 414.064
  -9  -9   0 1359.94 411.800
  -9  18   0 1071.08 310.323
  18  -9   0 1177.94 329.356
   9 -18   0 1002.27 347.154
 -18   9   0 1365.52 429.659
 -18   9   0 919.487 364.253
  -9  18   3 21758.5 1228.91
   9 -18  -3 24730.2 1226.12
  -9  -9   3 23227.7 1789.73
  -9  18   3 21950.0 1659.80
  -9  18   3 27952.7 1318.39
 -18   9  -3 26323.8 1618.38
  -9  -9   3 23594.6 1722.95
  18  -9   3 26817.6 1486.03
 -18   9  -3 27779.7 1931.60
   9   9  -3 22550.0 1441.73
  -9  18   3 26135.1 1152.85
   9   9  -6 1301.46 456.045
  -9  -9   6 1992.35 609.669
   9 -18  -6 1017.13 407.774
   9   9  -6 1383.28 440.190
 -18   9  -6 1107.06 353.649
  18  -9   6 1356.88 422.005
 -18   9  -6 1726.99 608.652
  -9  18   6 1295.14 518.041
   9 -18  -9 7152.28 1114.97
   9   9  -9 6124.82 1026.94
  -9  -9   9 7389.52 1303.95
 -18   9  -9 5773.09 1150.33
  18  -9   9 8022.59 1170.85
  -9  18   9 6190.22 999.652
   9   9  -9 5916.97 966.731
  -8 -10 -10 2233.56 742.543
  -8 -10 -10 3811.02 1022.48
  10 -18  10 1658.93 710.492
 -18   8  10 2195.08 784.846
 -10  18 -10 2391.37 856.693
 -18   8   7 18251.0 1848.08
 -10  18  -7 22184.6 2020.67
   8  10   7 19484.3 1712.28
  10 -18   7 22924.9 1962.77
  -8 -10  -7 21174.0 1768.45
  18  -8  -7 19190.9 1640.87
 -18   8   4 8317.30 836.442
 -10  18  -4 9377.48 1120.47
  -8 -10  -4 6974.76 501.291
   8  10   4 8839.00 1022.53
 -18   8   4 8997.22 1176.34
  18  -8  -4 8000.80 913.379
  10 -18   4 9057.33 1144.33
  -8 -10  -4 9446.66 1109.49
  -8 -10  -1 19031.0 1535.25
 -18   8   1 18754.1 1359.67
  10 -18   1 20529.6 1600.35
 -10  18  -1 20911.0 1473.91
 -18   8   1 20881.8 1586.52
   8  10   1 24028.7 1455.70
  18  -8  -1 18716.8 1231.67
  -8 -10  -1 23956.6 1387.81
  18  -8   2 4359.52 631.490
  -8 -10   2 3624.22 715.217
  10 -18  -2 4252.21 422.337
 -10  18   2 4551.85 779.705
 -10  18   2 4780.68 586.850
 -18   8  -2 4315.63 665.209
  -8 -10   2 3414.92 667.861
 -18   8  -2 3526.23 711.268
   8  10  -2 4890.54 641.579
 -10  18   2 3649.41 342.803
  10 -18  -5 28453.2 1625.72
   8  10  -5 31530.5 2006.35
 -10  18   5 25194.3 1827.98
 -18   8  -5 26045.6 1514.44
  -8 -10   5 27005.2 2027.19
 -18   8  -5 26858.3 2083.58
  18  -8   5 30372.4 1810.22
   8  10  -5 30136.0 1755.49
   8  10  -8 283.817 368.863
  -8 -10   8-32.5695 368.588
  10 -18  -8 447.837 388.087
   8  10  -8 149.215 283.040
  18  -8   8 514.090 364.358
 -18   8  -8 1274.31 665.016
 -10  18   8 250.292 403.327
  -7 -11  -8 17518.4 1601.82
  -7 -11  -8 19035.7 1934.10
 -11  18  -8 18873.1 1923.45
  11 -18   8 22501.7 1958.26
  18  -7  -8 14496.3 1528.24
 -18   7   8 18705.3 1961.47
  11 -18   5 13706.3 1452.50
  -7 -11  -5 16505.7 1477.39
 -18   7   5 15196.9 1119.87
 -11  18  -5 13518.6 704.341
 -11  18  -5 16172.9 1593.82
   7  11   5 15088.0 1358.32
 -18   7   5 15770.6 1601.29
  18  -7  -5 12536.2 1191.95
  -7 -11  -2 15549.6 1406.71
  18  -7  -2 15823.5 1205.25
  -7 -11  -2 14221.0 1008.84
   7  11   2 16180.8 1224.16
 -11  18  -2 16856.4 1382.90
  11 -18   2 14524.0 1393.46
 -18   7   2 15258.0 1391.42
 -18   7   2 14223.8 1182.94
  -7 -11   1 1929.60 541.594
 -18   7  -1 1196.81 393.206
 -11  18   1 1250.78 440.778
  -7 -11   1 1503.56 409.763
 -11  18   1 1511.57 385.050
  18  -7   1 1237.79 382.429
   7  11  -1 1339.20 354.751
 -18   7  -1 1440.57 429.137
  11 -18  -4 110376. 2877.58
   7  11  -4 109174. 3636.74
 -11  18   4 109381. 3815.84
 -11  18   4 111636. 2198.80
 -18   7  -4 110613. 3094.04
  -7 -11   4 110743. 3924.20
  18  -7   4 100326. 3156.23
 -18   7  -4 108965. 3968.03
   7  11  -4 116738. 3270.11
  11 -18  -7 2159.53 581.749
  -7 -11   7 1122.00 460.536
   7  11  -7 3234.11 748.298
   7  11  -7 4520.88 791.177
 -11  18   7 4743.73 879.550
  18  -7   7 3094.27 645.060
 -18   7  -7 3849.97 929.953
   7  11 -10 2160.56 693.279
 -11  18  10 667.226 386.640
  11 -18 -10 3313.35 942.699
  -7 -11  10 977.363 703.332
   7  11 -10 2353.54 783.772
 -18   7 -10 1026.37 621.890
  18  -7  10 1407.58 595.371
  18  -6  -9 2012.48 657.634
  -6 -12  -9 923.795 462.990
  -6 -12  -9 613.515 512.296
 -18   6   9 1032.01 625.177
 -12  18  -9 1640.68 665.760
  12 -18   9 800.236 473.828
  18  -6  -6 442.126 330.616
  -6 -12  -6 523.108 401.525
 -18   6   6 332.153 421.843
 -18   6   6-72.8315 261.336
   6  12   6 598.880 329.103
 -12  18  -6 175.708 349.722
  12 -18   6 745.531 444.725
  12 -18   3 1481.27 574.069
 -18   6   3 1986.74 557.251
 -18   6   3 1548.39 465.634
  -6 -12  -3 1279.40 306.023
  -6 -12  -3 1873.09 481.446
 -12  18  -3 2219.40 597.857
   6  12   3 1415.35 427.879
  18  -6  -3 1907.65 488.723
 -18   6   0 1163.14 422.149
 -18   6   0 814.122 355.850
  -6 -12   0 471.863 330.849
 -12  18   0 745.480 366.557
 -12  18   0 337.734 163.324
  -6 -12   0 756.178 325.216
   6  12   0 664.072 271.153
  18  -6   0 710.897 277.382
  12 -18  -3 1800.78 316.644
 -12  18   3 1597.35 320.420
   6  12  -3 2146.13 540.720
 -12  18   3 2302.62 377.070
 -12  18   3 2929.08 664.692
 -18   6  -3 2680.91 528.012
  -6 -12   3 3384.64 676.054
  18  -6   3 2903.70 551.493
   6  12  -3 2648.72 497.838
 -12  18   3 2229.89 348.304
 -18   6  -3 2795.24 653.022
   6  12  -6 370.845 280.848
  12 -18  -6 439.458 327.828
  -6 -12   6 756.027 414.552
   6  12  -6 103.656 296.699
 -18   6  -6 1.84360 293.516
  18  -6   6 206.743 276.889
 -12  18   6 446.260 374.084
 -18   6  -6 305.080 244.029
 -12  18   9 742.974 525.290
   6  12  -9 78.9093 321.705
  12 -18  -9-150.521 289.288
  -6 -12   9 284.069 396.696
   6  12  -9 786.429 552.029
  18  -6   9-136.989 358.555
 -18   6  -9 169.484 479.904
  18  -5 -10 413.483 456.589
  -5 -13 -10 370.352 509.439
 -18   5  10 1219.70 753.690
 -13  18 -10 685.810 608.881
  13 -18  10 344.093 437.976
  18  -5  -7 1324.97 510.853
  13 -18   7 74.4619 339.923
  -5 -13  -7 778.307 429.372
 -18   5   7 1463.65 591.767
  18  -5  -7 637.701 275.904
 -13  18  -7-348.168 504.521
 -18   5   4 18966.6 1370.84
  -5 -13  -4 18704.6 1516.55
 -13  18  -4 17207.8 1584.80
  13 -18   4 21114.4 1752.05
   5  13   4 19701.9 1469.37
 -18   5   4 16456.3 1607.06
  18  -5  -4 16435.5 1355.08
 -18   5   1 200.099 181.529
 -18   5   1 374.698 302.012
  -5 -13  -1-184.546 333.071
 -13  18  -1-52.4376 267.116
  -5 -13  -1 177.422 226.757
   5  13   1 81.1148 169.218
  18  -5  -1-72.3587 182.287
 -13  18  -1-101.233 277.141
  13 -18  -2 3645.14 386.348
   5  13  -2 3368.01 672.297
 -13  18   2 4745.73 865.824
 -13  18   2 3067.97 501.924
  -5 -13   2 2872.05 637.466
 -18   5  -2 4147.12 635.927
  18  -5   2 5059.48 710.731
 -18   5  -2 3768.94 742.508
 -13  18   2 3493.42 338.871
   5  13  -2 3859.89 557.569
  13 -18  -5 30390.3 1677.09
   5  13  -5 29903.4 1992.07
 -13  18   5 27405.7 2080.44
 -18   5  -5 29277.0 1364.57
  18  -5   5 26954.5 1813.63
  -5 -13   5 27343.9 2057.42
 -18   5  -5 31945.5 2266.80
   5  13  -5 26970.3 1593.34
  13 -18  -8 6827.69 1005.94
   5  13  -8 4942.28 965.294
  -5 -13   8 4440.16 973.006
 -13  18   8 5550.40 1009.49
  18  -5   8 7866.64 1154.36
 -18   5  -8 2877.45 759.582
   5  13  -8 5333.25 879.053
  18  -4  -8 2623.75 706.788
  -4 -14  -8 2834.71 678.016
  -4 -14  -8 2846.16 802.720
  14 -18   8 3049.78 743.729
 -18   4   8 1890.38 798.297
  -4 -14  -5 7147.46 957.070
 -18   4   5 9226.43 1003.11
   4  14   5 8215.21 705.340
 -18   4   5 12713.9 1495.54
 -14  18  -5 9194.57 1225.47
  14 -18   5 10206.0 1246.70
   4  14   5 8603.50 1012.75
  14 -18   5 10037.0 588.973
  18  -4  -5 10400.4 1146.17
  -4 -14  -2 12450.5 1248.65
 -14  18  -2 11124.2 1255.15
 -14  18  -2 11895.7 1210.55
   4  14   2 9153.64 895.486
  18  -4  -2 13153.0 1152.99
  -4 -14  -2 14299.2 1095.80
 -18   4   2 11351.2 1126.37
 -18   4   2 12009.9 1276.42
 -18   4  -1 144.418 256.256
 -18   4  -1 532.544 339.124
   4  14  -1 292.529 247.078
 -14  18   1 15.4742 256.066
 -14  18   1 282.753 103.370
 -14  18   1 686.958 282.543
  18  -4   1 6.24110 251.352
   4  14  -1 345.432 229.860
  -4 -14   1 576.585 387.082
 -18   4  -4 497.689 235.583
  14 -18  -4 291.757 194.101
   4  14  -4 1327.11 491.528
  18  -4   4 1029.47 329.784
  -4 -14   4 1528.68 514.081
 -14  18   4 1598.31 541.884
 -18   4  -4 186.879 413.069
   4  14  -4 644.741 281.347
   4  14  -7 4420.34 744.171
  14 -18  -7 3035.54 671.038
   4  14  -7 5224.01 971.540
  -4 -14   7 4795.53 975.970
 -14  18   7 4391.66 919.820
  18  -4   7 4183.01 842.569
 -18   4  -7 4059.91 909.449
   4  14 -10 558.366 470.863
 -14  18  10 1127.11 607.552
  14 -18 -10 372.993 462.511
   4  14 -10 1607.25 754.341
  -4 -14  10 944.425 776.561
  18  -4  10 618.601 551.202
 -18   4 -10 468.630 443.883
 -18   3   9 21394.6 2232.55
  -3 -15  -9 22390.9 2189.06
  15 -18   9 21133.0 1925.12
 -15  18  -9 20279.1 2146.22
  18  -3  -9 18249.1 1854.74
  -3 -15  -6 17656.7 1446.99
 -18   3   6 21608.7 1595.98
 -15  18  -6 20144.5 1878.75
  15 -18   6 20205.4 1757.54
   3  15   6 18442.5 1554.59
  18  -3  -6 22130.7 1732.19
 -18   3   3 392.638 223.890
  -3 -15  -3 748.243 393.131
 -18   3   3 588.296 364.388
 -15  18  -3 610.674 451.113
 -15  18  -3 793.130 450.699
   3  15   3 618.588 347.438
  -3 -15  -3 971.097 329.016
  18  -3  -3 837.897 366.795
   3  15   0 30750.2 1841.29
  -3 -15   0 32333.0 1862.08
 -15  18   0 33006.4 2163.51
 -15  18   0 30514.3 1716.93
 -18   3   0 29452.0 1802.16
   3  15   0 28446.7 1421.42
  18  -3   0 31950.4 1795.27
 -18   3   0 28584.3 1923.29
  15 -18  -3 9834.31 770.944
  18  -3   3 10758.1 1088.22
   3  15  -3 12177.1 1265.59
   3  15  -3 9576.25 859.002
 -15  18   3 9088.10 1198.84
 -15  18   3 10373.7 787.766
 -18   3  -3 12170.6 1356.77
 -18   3  -3 10871.6 908.862
  -3 -15   3 9815.87 1214.31
  15 -18  -6 11102.1 1102.02
   3  15  -6 11160.7 1349.74
 -18   3  -6 11268.5 1432.43
 -15  18   6 11847.5 1468.63
  18  -3   6 11753.1 1311.65
  -3 -15   6 12223.4 1481.29
   3  15  -6 12601.8 1126.12
 -15  18   9-364.337 473.816
   3  15  -9-251.454 400.804
  15 -18  -9 117.855 306.206
   3  15  -9-407.340 416.227
  -3 -15   9 642.676 535.323
  18  -3   9 385.476 472.041
 -18   3  -9 1047.29 625.361
  16 -18  10 315.621 450.148
  -2 -16 -10 508.436 638.241
 -16  18 -10 1099.42 858.785
  -2 -16  -7 414.722 346.762
  -2 -16  -7-147.722 347.254
 -18   2   7 424.092 473.032
  16 -18   7-319.522 328.112
  18  -2  -7-364.328 345.518
 -18   2   4 1226.51 427.902
  -2 -16  -4 904.699 392.948
 -18   2   4 1085.58 537.793
 -16  18  -4 489.817 359.201
   2  16   4 723.205 306.837
   2  16   4 863.224 344.792
 -16  18  -4 1210.81 563.815
  18  -2  -4 1381.10 439.340
   2  16   1 10568.9 1078.12
 -16  18  -1 7096.74 1034.56
 -16  18  -1 7620.75 948.025
  -2 -16  -1 6792.95 854.101
   2  16   1 7517.21 774.833
 -18   2   1 9370.75 1082.66
  18  -2  -1 8994.45 979.694
 -18   2   1 7782.15 973.901
  16 -18  -2 17205.0 900.511
  -2 -16   2 15854.5 1463.50
   2  16  -2 13775.2 1313.95
 -16  18   2 17587.2 1650.74
 -16  18   2 15016.6 1087.63
   2  16  -2 16358.8 1056.90
 -18   2  -2 18995.3 1664.29
 -18   2  -2 15775.3 1184.90
  18  -2   2 17592.6 1398.61
   2  16  -5 1695.71 427.467
  16 -18  -5 1358.79 396.455
 -16  18   5 767.313 440.657
   2  16  -5 900.571 470.351
  18  -2   5 2548.15 677.751
  -2 -16   5 2051.37 643.184
 -18   2  -5 1190.20 519.344
 -16  18   8-23.0605 402.138
   2  16  -8 576.456 288.800
  16 -18  -8 941.728 414.136
   2  16  -8 1611.10 649.526
  18  -2   8 1632.96 620.791
 -18   2  -8 1204.24 686.742
 -18   1   8 6634.54 1245.61
  -1 -17  -8 5797.75 1075.06
  18  -1  -8 4655.91 752.844
 -17  18  -8 7028.95 1360.88
  17 -18   8 5002.07 932.140
  18  -1  -8 5464.34 998.590
 -18   1   5 7776.13 1192.39
 -18   1   5 7097.85 978.148
  -1 -17  -5 6812.38 909.442
 -17  18  -5 6665.15 1028.68
   1  17   5 8204.63 866.253
 -17  18  -5 7250.40 1128.59
   1  17   5 8733.52 1013.41
  18  -1  -5 8030.06 1049.70
 -18   1   2 5937.31 931.502
 -18   1   2 5509.85 887.475
  -1 -17  -2 4726.52 732.950
   1  17   2 5605.38 786.676
 -17  18  -2 4448.97 850.442
 -17  18  -2 4322.41 765.556
   1  17   2 4765.54 621.722
  18  -1  -2 6749.83 881.499
 -18   1  -1-214.248 312.627
  17 -18  -1-61.1303 94.7792
  18  -1   1-137.596 229.640
 -18   1  -1-12.7587 191.078
   1  17  -1 662.261 372.835
 -17  18   1-85.2289 254.467
  -1 -17   1-257.926 296.700
 -17  18   1 47.2232 215.272
   1  17  -1-218.283 191.879
 -18   1  -4 2760.81 748.789
  17 -18  -4 2864.19 493.958
  -1 -17   4 2186.92 669.989
 -18   1  -4 2851.84 413.145
 -17  18   4 2446.91 716.190
   1  17  -4 2884.83 706.104
  18  -1   4 2003.60 516.662
   1  17  -4 2916.51 482.765
   1  17  -7 64.4733 201.799
  17 -18  -7 22.8091 268.691
  18  -1   7 765.203 590.107
   1  17  -7 551.527 513.640
  -1 -17   7 307.451 469.193
 -17  18   7-518.097 552.051
 -18   1  -7 872.415 554.304
   0 -18  -9 4375.08 1014.53
 -18  18  -9 4922.58 1085.75
  18   0  -9 4838.28 1023.63
   0 -18  -6 601.099 328.358
  18   0  -6 790.568 336.366
 -18  18  -6 142.268 270.706
 -18   0   6 1680.44 569.550
 -18  18  -6 945.774 511.019
   0  18   6 601.280 396.275
  18   0  -6 488.356 326.771
   0 -18  -3 10631.8 1033.45
 -18   0   3 8535.27 1101.39
 -18   0   3 8570.91 1149.29
   0  18   3 6560.66 849.867
 -18  18  -3 7098.76 1047.24
 -18  18  -3 5596.66 902.384
   0  18   3 7791.68 840.131
  18 -18   3 7071.73 465.476
  18   0  -3 8368.88 1019.92
 -18   0   0 3552.87 730.663
   0  18   0 3270.71 648.683
 -18   0   0 2857.21 582.891
 -18  18   0 2933.19 724.325
 -18  18   0 3644.40 637.053
   0 -18   0 3778.88 702.652
   0  18   0 2887.99 448.754
  18   0   0 5129.89 797.936
  18 -18   0 4127.19 389.291
  18 -18  -3 6455.15 672.386
  18   0   3 6738.03 917.846
 -18   0  -3 5848.82 679.615
 -18  18   3 5903.92 649.528
   0 -18   3 6319.50 1011.23
   0  18  -3 4779.72 844.458
 -18  18   3 5072.48 985.768
 -18   0  -3 5010.20 937.126
   0  18  -3 5960.81 628.802
 -18   0  -6-34.3093 355.463
   0 -18   6 49.8711 344.352
  18 -18  -6 140.091 234.975
   0  18  -6 496.646 280.056
   0  18  -6-88.8043 381.988
  18   0   6 509.910 411.301
 -18  18   6 909.537 565.061
  18 -18  -9 8608.40 1271.55
   0 -18   9 7351.99 1389.04
 -18  18   9 4541.04 1038.91
   0  18  -9 9495.34 1476.46
  18   0   9 6435.22 1139.87
 -18   0  -9 6871.29 1263.45
 -18  -1  -8 1204.90 649.424
 -19  18   8 257.087 522.976
  19 -18  -8 268.514 400.373
   1 -19   8 1703.86 736.068
  -1  19  -8 112.262 380.692
  18   1   8 828.323 500.192
 -18  -1  -5 1420.98 666.684
  -1  19  -5 960.330 299.247
  19 -18  -5 762.603 334.323
   1 -19   5 829.324 511.294
  -1  19  -5 1674.13 625.250
  18   1   5 1169.22 472.089
 -19  18   5 1740.27 669.984
 -18  -1  -2 2973.64 754.973
 -18  -1  -2 3680.98 577.874
  -1  19  -2 4021.37 772.972
 -19  18   2 4926.71 930.217
   1 -19   2 3038.87 701.478
 -19  18   2 2883.68 521.048
  -1  19  -2 4107.33 505.904
  18   1   2 3136.45 689.630
  19 -18  -2 2976.33 435.281
 -18  -1   1 25550.9 1797.19
   1 -19  -1 24274.0 1732.43
  -1  19   1 24055.7 1647.99
 -19  18  -1 21311.7 1837.02
 -19  18  -1 24473.9 1756.61
  -1  19   1 25684.4 1317.73
  18   1  -1 24012.2 1698.55
  19 -18   1 23966.9 933.106
 -18  -1   1 21213.3 1783.17
 -18  -1   4 15126.5 1483.06
 -18  -1   4 14634.9 1576.09
  -1  19   4 14394.0 1222.02
  -1  19   4 14540.0 1268.03
 -19  18  -4 12554.8 1431.09
 -19  18  -4 13770.4 1511.39
  -1  19   4 15441.9 1232.94
  18   1  -4 16126.9 1485.97
 -18  -1   7 7262.90 1261.69
   1 -19  -7 5300.71 974.118
 -19  18  -7 5947.07 1041.53
 -19  18  -7 5572.11 1142.77
  18   1  -7 4721.51 940.656
 -17  -2  -9 2732.29 892.009
 -19  17   9 1994.41 711.180
  19 -17  -9 1935.84 678.813
   2 -19   9 4304.54 1034.88
  -2  19  -9 2021.50 795.466
  17   2   9 2853.37 802.190
 -17  -2  -6 1362.31 627.267
  -2  19  -6 1503.28 390.448
  19 -17  -6 1197.17 399.003
   2 -19   6 1423.93 635.755
  -2  19  -6 1029.82 602.285
  17   2   6 1900.23 594.841
 -19  17   6 1945.40 690.157
  19 -17  -3-58.4032 199.919
 -17  -2  -3 102.344 329.419
 -17  -2  -3 138.379 189.147
  -2  19  -3 131.342 303.137
   2 -19   3 1105.83 457.924
  17   2   3 603.028 333.060
 -19  17   3 503.431 499.641
  -2  19  -3 13.6354 137.708
 -17  -2   0 31274.5 1844.68
  -2  19   0 32409.4 1930.75
 -19  17   0 32014.3 2217.13
 -19  17   0 32224.2 1922.30
  17   2   0 30355.8 1898.13
   2 -19   0 29625.1 1964.82
  19 -17   0 31134.7 1210.49
 -17  -2   0 31296.7 2140.29
 -17  -2   3 137.665 250.080
  -2  19   3 199.547 175.090
  -2  19   3 253.343 312.344
 -19  17  -3 708.392 468.810
 -17  -2   3-207.585 366.375
  -2  19   3-78.6403 202.186
 -19  17  -3 174.969 421.068
  19 -17   3 323.492 188.686
  17   2  -3 196.198 266.478
   2 -19  -6-484.191 405.976
  17   2  -6-273.821 279.586
  -2  19   6-47.9892 220.529
 -17  -2   6 43.9919 457.596
  -2  19   6 105.858 246.023
 -19  17  -6 167.715 451.598
  19 -17   6 219.872 255.727
  17   2  -6 287.933 282.205
  17   2  -9-84.3048 399.199
   2 -19  -9 167.820 449.227
 -17  -2   9-326.389 524.577
 -19  17  -9-307.922 560.774
  19 -16  -7 8693.32 1130.42
   3 -19   7 6817.86 1193.30
  -3  19  -7 9132.11 1354.53
 -19  16   7 8138.42 1334.30
  16   3   7 9067.39 1272.95
 -16  -3  -7 6374.81 1129.14
  -3  19  -4 12798.2 1391.78
   3 -19   4 10069.8 1294.19
 -19  16   4 11094.6 1444.75
  16   3   4 10632.5 1204.66
 -19  16   4 10791.3 776.951
 -16  -3  -4 11167.7 1380.75
  -3  19  -4 10923.9 794.339
  19 -16  -4 11866.4 1041.65
 -16  -3  -1 9353.11 929.185
  -3  19  -1 6948.00 915.139
 -19  16   1 9152.73 1225.18
 -19  16   1 11530.5 1086.83
   3 -19   1 8405.70 1085.75
  16   3   1 8220.91 951.615
  -3  19  -1 9797.17 642.471
  19 -16  -1 10024.1 766.487
 -16  -3  -1 12167.6 1337.19
 -16  -3   2 11640.4 1273.27
 -16  -3   2 10759.6 1218.08
  -3  19   2 13674.5 1176.74
 -19  16  -2 11036.9 1269.75
  16   3  -2 12342.2 1173.74
 -19  16  -2 10690.8 1190.89
  19 -16   2 10896.8 723.264
  -3  19   2 13577.8 933.428
   3 -19  -2 11198.8 1139.16
  19 -16   5 19401.2 1157.90
 -16  -3   5 16765.8 1586.63
 -16  -3   5 15525.2 1647.29
  -3  19   5 15533.4 1153.13
 -19  16  -5 17931.3 1613.65
  -3  19   5 18655.0 1459.34
  16   3  -5 18758.5 1595.05
 -19  16  -5 19321.9 1857.10
  16   3  -8 2411.58 687.173
   3 -19  -8 2230.98 656.356
  16   3  -8 913.213 424.348
 -19  16  -8 946.066 451.779
 -16  -3   8 1095.22 618.900
 -19  16  -8 896.425 600.496
 -15  -4  -8 1930.94 716.650
  15   4   8 1338.89 614.888
  19 -15  -8 683.808 461.512
 -19  15   8-373.850 522.847
   4 -19   8 1321.28 629.904
  -4  19  -8 626.358 496.698
  -4  19  -5 34714.7 1444.40
   4 -19   5 36392.1 2493.26
  -4  19  -5 37095.2 2434.36
 -19  15   5 32351.6 2420.43
  15   4   5 39356.3 2380.59
 -15  -4  -5 39644.4 2580.08
  19 -15  -5 35428.8 1939.45
  -4  19  -2 11707.2 1228.77
 -15  -4  -2 13673.4 993.368
 -19  15   2 14374.8 1515.03
   4 -19   2 11876.3 1311.45
 -19  15   2 13338.7 1071.75
  15   4   2 13035.0 1214.66
  -4  19  -2 12283.0 660.272
  19 -15  -2 10809.2 873.655
 -15  -4  -2 9634.51 1205.18
 -15  -4   1 603.502 394.751
  -4  19   1 436.022 278.677
 -19  15  -1 314.274 276.409
 -15  -4   1 293.846 212.047
 -19  15  -1 438.795 352.925
  -4  19   1 316.836 152.902
  19 -15   1 683.002 247.005
   4 -19  -1-123.828 238.325
  15   4  -1 156.772 201.337
 -15  -4   4 10263.4 1229.38
 -15  -4   4 10377.6 1280.60
  -4  19   4 10914.6 959.186
  -4  19   4 8511.32 1029.32
 -19  15  -4 11195.6 1261.22
 -19  15  -4 9558.06 1246.75
  15   4  -4 12067.5 1247.18
  -4  19   4 10986.6 977.011
  19 -15   4 9634.99 807.627
   4 -19  -7 13051.2 1443.95
 -15  -4   7 14202.7 1689.49
  15   4  -7 12481.4 1305.26
 -19  15  -7 11459.2 1276.24
  -4  19   7 13041.2 1252.09
 -19  15  -7 15894.0 1808.24
  15   4  -7 12987.0 1433.16
 -14  -5  -9 2727.08 846.979
  19 -14  -9 1391.49 538.237
 -19  14   9 2993.55 882.062
   5 -19   9 3313.47 951.491
  -5  19  -9 166.389 432.367
  14   5   9 1649.28 688.303
  -5  19  -6 7656.68 730.380
   5 -19   6 6768.96 1147.78
  -5  19  -6 8248.81 1214.34
 -19  14   6 8356.99 1250.40
  14   5   6 8414.74 1129.34
 -14  -5  -6 9254.61 1281.46
  19 -14  -6 7636.41 1005.83
  19 -14  -3 423.455 242.800
  -5  19  -3 197.214 112.589
 -14  -5  -3 428.660 302.132
 -14  -5  -3 32.3539 126.467
   5 -19   3-410.990 430.175
  -5  19  -3 326.341 255.825
  14   5   3 536.946 370.226
 -19  14   3 563.184 333.400
 -19  14   3 59.1442 181.913
 -14  -5   0 76403.8 3248.15
  19 -14   0 81157.8 2263.63
  -5  19   0 78320.0 1769.10
   5 -19   0 74991.2 3044.62
  14   5   0 82121.4 2959.10
 -14  -5   0 83794.6 2846.04
  -5  19   0 80600.5 2895.75
 -19  14   0 77955.7 3279.07
 -19  14   0 84190.6 3010.69
  -5  19   0 85212.2 1636.44
 -14  -5   3 421.561 383.500
  -5  19   3 1041.48 268.681
  -5  19   3 1256.84 357.579
  -5  19   3 917.564 423.261
 -14  -5   3 752.782 448.018
 -19  14  -3 1356.56 472.544
 -19  14  -3 359.476 338.613
  14   5  -3 607.644 323.647
  19 -14   3 760.809 240.528
 -14  -5   6 121.505 448.338
   5 -19  -6 151.506 311.991
  14   5  -6-127.325 334.759
 -19  14  -6-189.716 318.018
 -19  14  -6-80.3582 291.702
  -5  19   6-48.6580 229.767
  19 -14   6-133.165 238.127
  14   5  -6-38.6603 238.807
   5 -19  -9 8186.23 1343.39
  14   5  -9 6930.32 1067.92
 -14  -5   9 6614.65 1325.49
 -19  14  -9 11020.3 1654.53
  19 -14   9 9925.90 1193.06
  14   5  -9 7264.18 1184.47
 -13  -6 -10 1694.46 860.216
  19 -13 -10 2761.42 766.574
 -19  13  10 2063.24 808.235
   6 -19  10 2643.26 844.981
  -6  19 -10 816.089 559.248
  13   6  10 3022.09 854.539
 -13  -6  -7 914.717 493.452
  19 -13  -7 9.06541 324.858
 -19  13   7 507.954 400.505
  13   6   7-196.881 367.667
  -6  19  -7 436.853 497.387
   6 -19   7-97.1656 446.269
  -6  19  -4 15093.4 1490.62
   6 -19   4 15579.0 1546.62
 -19  13   4 12716.6 1467.00
  13   6   4 17089.4 1499.12
 -19  13   4 19097.0 1107.71
 -13  -6  -4 15976.2 1566.22
  19 -13  -4 17706.3 1324.18
 -13  -6  -1 268.086 214.466
   6 -19   1 401.592 369.162
 -19  13   1 655.042 360.566
  19 -13  -1 92.9757 163.704
  -6  19  -1 246.581 89.9020
 -13  -6  -1 303.983 394.631
  -6  19  -1-12.3920 216.685
  13   6   1 784.569 364.092
 -19  13   1 567.027 295.769
  -6  19   2 586.620 220.008
 -13  -6   2 168.190 290.876
  -6  19   2 957.010 337.369
  -6  19   2 322.540 224.041
  -6  19   2 850.369 225.075
 -19  13  -2 1313.15 509.961
 -13  -6   2 376.304 285.552
 -19  13  -2 395.998 304.937
  19 -13   2 599.410 236.337
  13   6  -2 94.2201 217.463
   6 -19  -5 6039.36 853.192
  13   6  -5 6146.03 876.534
  -6  19   5 7358.91 702.877
 -13  -6   5 8354.69 1205.21
 -19  13  -5 8536.92 1045.22
  -6  19   5 7364.29 984.352
  13   6  -5 7625.84 971.765
 -19  13  -5 6315.31 1090.74
  19 -13   5 8512.63 874.157
  13   6  -8 80.0183 354.055
   6 -19  -8 777.442 585.636
  13   6  -8 50.7296 332.269
 -19  13  -8 454.169 350.535
  19 -13   8-48.3071 271.992
 -19  13  -8 604.257 447.034
 -13  -6   8-4.59267 513.786
 -12  -7  -8 1812.22 673.854
  19 -12  -8 2848.21 703.211
 -19  12   8 3018.40 849.542
  -7  19  -8 3972.37 915.675
  12   7   8 1746.63 601.114
   7 -19   8 930.246 564.009
 -19  12   5 11530.3 813.279
  -7  19  -5 10365.9 692.879
  -7  19  -5 13008.8 1455.55
   7 -19   5 10816.4 1328.54
 -19  12   5 8447.12 1240.61
  12   7   5 11137.8 1258.27
 -12  -7  -5 10954.7 1311.31
  19 -12  -5 11434.6 1132.16
  19 -12  -2 17725.7 1193.64
  -7  19  -2 15332.0 1384.42
 -19  12   2 14379.1 1460.99
 -12  -7  -2 16644.0 1058.51
 -19  12   2 18480.0 1280.87
   7 -19   2 18957.9 1604.08
  12   7   2 16294.5 1321.26
 -12  -7  -2 17061.1 1535.72
  -7  19   1 111163. 1893.62
   7 -19  -1 115518. 3700.28
 -12  -7   1 118302. 4003.80
  -7  19   1 132084. 3466.26
 -12  -7   1 123216. 3622.95
 -19  12  -1 117389. 3871.54
 -19  12  -1 124037. 3814.35
  -7  19   1 123738. 1858.91
  12   7  -1 123973. 3531.72
  19 -12   1 116344. 2832.41
  12   7  -4 758.704 340.707
   7 -19  -4 1558.35 403.488
 -12  -7   4 354.380 372.482
  -7  19   4 749.631 231.402
  -7  19   4 1875.55 546.856
 -19  12  -4 1152.31 448.206
  19 -12   4 717.626 290.272
 -19  12  -4 756.669 369.042
 -12  -7   4 1328.64 548.731
  12   7  -7 1126.37 465.880
   7 -19  -7 905.164 411.078
  12   7  -7 723.584 389.364
 -19  12  -7 401.267 348.898
 -19  12  -7 516.964 386.365
  -7  19   7 433.018 393.130
 -12  -7   7 937.616 502.986
  19 -12   7 1069.53 356.942
   7 -19 -10 7155.23 1277.80
  12   7 -10 6765.31 1137.13
 -12  -7  10 6298.95 1306.26
  19 -12  10 5880.15 1034.32
 -19  12 -10 5311.02 1268.63
  12   7 -10 5208.01 1048.95
   8 -19   9 42.5237 414.105
 -11  -8  -9 1238.32 583.361
  19 -11  -9 40.0700 470.557
  -8  19  -9 328.319 553.699
  11   8   9-387.166 519.626
  19 -11  -6 1578.28 507.649
 -11  -8  -6 1883.09 579.301
 -19  11   6 1436.40 589.460
  11   8   6 2722.61 662.947
   8 -19   6 1645.98 587.586
  -8  19  -6 1523.69 577.231
 -11  -8  -3 23349.4 1088.82
  -8  19  -3 20297.7 1644.41
 -19  11   3 24053.2 1917.23
  11   8   3 25292.0 1701.46
 -19  11   3 24163.9 1423.06
  19 -11  -3 23499.7 1448.99
 -11  -8  -3 23073.9 1773.12
 -11  -8   0 2323.88 492.301
 -11  -8   0 2400.97 626.210
  -8  19   0 2373.06 509.122
 -19  11   0 4296.36 801.192
   8 -19   0 3259.69 667.177
 -19  11   0 2651.81 573.005
  11   8   0 3202.68 581.341
  19 -11   0 3399.55 509.506
 -11  -8   3 64195.2 2990.16
   8 -19  -3 60743.9 1996.49
  -8  19   3 59559.4 2748.10
  -8  19   3 63349.7 2147.39
 -19  11  -3 60599.5 2631.30
 -11  -8   3 61832.7 2841.56
 -19  11  -3 60828.6 2926.90
  19 -11   3 64207.8 2271.42
  11   8  -3 59243.2 2448.76
   8 -19  -6 6028.09 860.124
  11   8  -6 5754.47 910.801
 -19  11  -6 4711.02 750.878
 -11  -8   6 7892.66 1185.73
  -8  19   6 5367.23 889.685
 -19  11  -6 5670.24 1037.18
  19 -11   6 6783.31 876.147
  11   8  -6 5955.13 889.015
  11   8  -9 452.602 358.362
 -11  -8   9 261.290 424.781
   8 -19  -9 17.2577 354.120
  11   8  -9 895.062 549.381
  19 -11   9 299.469 403.518
 -19  11  -9 159.371 456.594
  19 -10 -10 424.461 512.311
 -10  -9 -10 918.446 621.838
   9 -19  10-9.39814 461.066
 -19  10  10-361.220 540.271
  -9  19 -10 98.6437 511.552
  10   9  10 833.442 554.661
  19 -10  -7 276.691 298.405
 -10  -9  -7 34.2007 372.375
 -19  10   7 475.227 501.431
   9 -19   7 922.648 507.312
  -9  19  -7 1339.40 572.130
  10   9   7 856.219 439.957
  19 -10  -4 26578.5 1647.60
 -10  -9  -4 24723.7 885.260
 -19  10   4 26087.3 2037.71
  -9  19  -4 29734.1 2053.37
  10   9   4 27549.6 1855.60
   9 -19   4 28026.4 2062.10
 -10  -9  -4 25029.0 1853.62
 -19  10   4 27994.9 1462.21
  10   9   1 46369.7 2137.50
 -10  -9  -1 43623.1 2416.61
 -19  10   1 45451.6 2138.13
  -9  19  -1 51789.3 2357.54
   9 -19   1 46056.4 2478.25
 -19  10   1 43002.6 2395.95
 -10  -9  -1 44731.4 1915.98
  19 -10  -1 47069.4 1930.86
 -10  -9   2 2089.77 566.129
 -10  -9   2 3919.02 780.030
 -19  10  -2 2353.32 595.880
  -9  19   2 3639.71 546.048
 -19  10  -2 2880.31 638.336
  -9  19   2 3851.69 392.606
  19 -10   2 3280.52 525.103
  -9  19   2 2617.59 311.096
  10   9  -2 3040.58 559.250
   9 -19  -5 3771.19 617.789
  10   9  -5 2762.82 617.682
  -9  19   5 3330.69 402.520
 -19  10  -5 3289.41 619.784
  -9  19   5 3664.01 732.034
 -10  -9   5 4424.74 859.549
  19 -10   5 4053.28 651.651
 -19  10  -5 3175.65 779.705
  10   9  -5 3335.38 606.787
   9 -19  -8 7725.73 1099.58
  10   9  -8 8084.50 1166.54
 -10  -9   8 8448.41 1345.80
  -9  19   8 6968.31 1052.15
 -19  10  -8 8019.18 1342.81
  19 -10   8 6262.26 949.163
  10   9  -8 5740.10 952.847
  19  -9  -8 307.370 364.089
  -9 -10  -8 171.839 312.726
 -19   9   8 557.745 577.397
  10 -19   8 782.470 511.010
 -10  19  -8 235.761 461.596
   9  10   8-139.907 374.734
  19  -9  -5 331.960 307.811
 -19   9   5 392.623 313.340
  -9 -10  -5 545.066 419.293
 -19   9   5-128.978 190.810
   9  10   5-394.287 327.114
 -10  19  -5-132.021 366.492
  10 -19   5-441.000 450.703
  -9 -10  -2 19305.0 1605.81
  -9 -10  -2 19455.2 1178.40
  10 -19   2 18837.0 1604.23
 -10  19  -2 21399.3 1604.11
 -19   9   2 18461.0 1606.67
   9  10   2 20606.9 1438.12
  19  -9  -2 19246.7 1326.61
 -19   9   2 20304.7 1406.60
  19  -9   1 90441.3 2716.55
 -10  19   1 81979.9 2679.12
 -19   9  -1 81692.0 3103.13
 -19   9  -1 89501.4 3279.57
  -9 -10   1 83950.7 2989.88
   9  10  -1 87178.8 2830.80
  -9 -10   4 943.229 478.993
  10 -19  -4 466.612 197.426
   9  10  -4 588.304 414.557
 -10  19   4 572.125 228.547
 -10  19   4 160.070 382.145
 -19   9  -4 147.763 233.404
 -19   9  -4 685.886 422.462
  19  -9   4 852.872 321.991
   9  10  -4 605.777 348.667
   9  10  -7 760.520 394.663
 -10  19   7 1759.67 624.134
  -9 -10   7 1460.37 647.354
  10 -19  -7 696.367 395.566
   9  10  -7 505.427 349.723
  19  -9   7 1773.26 518.276
 -19   9  -7 832.479 486.469
   9  10 -10 3240.51 833.222
  10 -19 -10 5444.62 1118.53
  -9 -10  10 3448.57 1031.18
   9  10 -10 3666.54 893.599
  19  -9  10 3833.76 913.491
 -19   9 -10 2627.72 928.714
  19  -8  -9 1092.46 555.132
  -8 -11  -9 1059.20 482.040
 -19   8   9 2200.51 861.953
  11 -19   9 340.606 412.240
 -11  19  -9 1699.75 817.759
  19  -8  -6 1035.75 390.145
  -8 -11  -6 733.995 380.456
 -19   8   6 2301.83 757.565
   8  11   6 1863.66 573.511
 -19   8   6 941.369 327.051
  11 -19   6 927.971 468.567
 -11  19  -6 240.594 340.757
 -19   8   3 1171.23 514.349
 -19   8   3 939.253 316.007
  -8 -11  -3 1207.04 494.683
   8  11   3 1115.55 382.644
 -11  19  -3 1265.06 458.636
  11 -19   3 1183.65 437.674
  -8 -11  -3 1572.81 350.275
  19  -8  -3 1565.28 438.594
 -11  19   0 48242.0 2560.75
 -11  19   0 49296.0 2152.54
 -19   8   0 50355.6 2449.83
   8  11   0 52146.3 2136.45
  19  -8   0 54641.2 2164.99
  -8 -11   0 49096.6 2184.78
 -19   8   0 47135.8 2303.49
   8  11  -3 1190.60 357.045
  11 -19  -3 1350.77 302.245
  -8 -11   3 1174.22 467.520
   8  11  -3 454.062 349.799
 -11  19   3 476.669 386.864
 -19   8  -3 1089.12 419.119
 -19   8  -3 1470.92 427.690
  19  -8   3 1165.62 351.017
   8  11  -6 2339.28 557.202
  -8 -11   6 1747.58 623.143
  11 -19  -6 2098.25 489.735
   8  11  -6 3024.97 700.392
 -19   8  -6 2500.85 492.844
 -11  19   6 2801.01 753.088
  19  -8   6 1762.97 556.402
 -19   8  -6 2831.50 780.526
 -11  19   9 4552.67 909.925
  11 -19  -9 4480.95 927.097
  -8 -11   9 4690.75 1109.27
   8  11  -9 5483.19 1074.42
  19  -8   9 5984.18 1046.51
 -19   8  -9 4937.75 1083.98
   8  11  -9 5804.70 992.506
  19  -7 -10 2612.46 816.679
  -7 -12 -10 1837.17 807.010
 -19   7  10 1697.32 743.976
  12 -19  10 1513.67 694.509
 -12  19 -10 1301.46 758.975
  19  -7  -7 1810.41 592.953
  -7 -12  -7 483.316 381.412
 -19   7   7 2094.78 760.455
 -12  19  -7 1064.05 526.019
   7  12   7 1688.57 560.950
  12 -19   7 1037.40 489.769
 -19   7   4 2033.65 620.355
 -19   7   4 1352.42 409.103
  -7 -12  -4 950.960 406.980
  12 -19   4 2744.54 675.251
 -12  19  -4 1775.09 605.830
   7  12   4 2692.85 617.160
  -7 -12  -4 1834.98 317.015
  19  -7  -4 891.932 381.259
  -7 -12  -1 14351.5 1146.76
  -7 -12  -1 12815.7 1325.43
 -12  19  -1 13040.5 1183.98
 -19   7   1 11575.0 1216.70
   7  12   1 12594.1 1077.88
  19  -7  -1 14609.9 1154.61
 -19   7   1 12945.2 1210.80
  12 -19  -2 52371.8 1398.39
 -12  19   2 49484.6 2659.90
 -12  19   2 58438.2 2090.09
 -19   7  -2 52257.1 2327.87
  -7 -12   2 54042.1 2551.31
  19  -7   2 57952.8 2315.74
   7  12  -2 55743.3 2154.89
 -12  19   2 51322.8 1219.17
 -19   7  -2 56982.6 2765.54
  12 -19  -5 239.558 245.682
  -7 -12   5-56.4924 295.051
   7  12  -5 1025.15 492.203
 -12  19   5-303.438 361.325
  19  -7   5-87.1700 296.985
 -19   7  -5-16.4057 228.787
 -19   7  -5 14.5354 351.471
   7  12  -5-224.074 223.670
   7  12  -8 1732.40 536.879
  12 -19  -8 3195.52 720.539
  -7 -12   8 1801.82 735.704
   7  12  -8 3448.01 842.921
  19  -7   8 2388.18 713.470
 -19   7  -8 2328.54 773.638
 -12  19   8 1182.46 583.576
  13 -19   8 610.141 448.553
  19  -6  -8 879.168 493.420
  -6 -13  -8 512.683 344.283
 -19   6   8 323.157 396.763
 -13  19  -8 411.427 452.821
   6  13   8 1210.85 530.171
  -6 -13  -5 29370.4 1983.87
 -19   6   5 34759.5 1862.58
  13 -19   5 32097.2 2198.74
 -13  19  -5 35660.4 2396.44
 -19   6   5 33409.2 2379.00
   6  13   5 35414.7 2093.46
  19  -6  -5 33206.9 2015.77
 -19   6   2 676.530 307.664
 -19   6   2 927.395 470.345
  -6 -13  -2 1038.99 481.060
   6  13   2 1328.54 367.276
  13 -19   2 1579.97 553.499
 -13  19  -2 345.146 248.268
  19  -6  -2 953.920 364.324
  -6 -13  -2 711.375 287.556
  -6 -13   1 9776.08 1082.18
  -6 -13   1 8148.98 1084.43
 -13  19   1 7838.53 1078.70
 -13  19   1 6933.19 796.303
 -19   6  -1 6884.84 873.639
  19  -6   1 8799.33 919.645
   6  13  -1 7208.95 787.244
 -19   6  -1 4671.35 849.412
  13 -19  -4 57005.5 2073.40
   6  13  -4 63382.6 2898.74
 -13  19   4 59517.0 2990.52
 -13  19   4 56100.5 1592.88
 -19   6  -4 55226.1 2153.92
  19  -6   4 54144.2 2432.31
 -19   6  -4 56881.2 2988.22
  -6 -13   4 52410.1 2779.45
   6  13  -4 53417.3 2208.47
  13 -19  -7 8665.39 1073.04
   6  13  -7 6006.16 1029.50
  -6 -13   7 7581.45 1216.71
 -13  19   7 7591.83 1182.76
  19  -6   7 8308.43 1105.55
 -19   6  -7 8838.79 1350.32
   6  13  -7 5890.82 896.301
   6  13 -10 733.136 434.871
 -13  19  10 1217.51 586.800
  13 -19 -10 558.164 599.241
  -6 -13  10 1447.84 716.841
   6  13 -10 750.303 537.161
  19  -6  10 593.249 526.410
 -19   6 -10 1188.82 660.619
  19  -5  -9 128.128 365.115
  14 -19   9 284.170 361.400
  -5 -14  -9-76.1544 457.198
 -19   5   9-509.378 585.096
 -14  19  -9-34.9649 430.470
  19  -5  -6 1755.57 588.999
  -5 -14  -6 958.128 444.514
 -19   5   6 1750.50 472.456
 -19   5   6 1677.23 600.804
 -14  19  -6 1523.03 609.151
  14 -19   6 2690.62 736.008
   5  14   6 2043.60 607.947
  14 -19   3-115.810 276.353
 -19   5   3-153.178 230.647
  -5 -14  -3 277.523 229.034
 -19   5   3 11.2888 345.393
  -5 -14  -3 39.6965 263.060
 -14  19  -3-51.0110 302.829
   5  14   3 272.381 236.621
  19  -5  -3 109.119 221.375
  -5 -14   0 74457.7 2817.19
  -5 -14   0 68916.6 3068.85
 -14  19   0 76231.7 3322.64
 -14  19   0 80114.7 2808.40
 -19   5   0 75586.9 2937.01
   5  14   0 74300.7 2429.72
  19  -5   0 79148.1 2796.41
 -19   5   0 74688.0 3041.60
  14 -19  -3 32806.1 1367.74
   5  14  -3 32925.9 2056.89
 -14  19   3 27969.1 2066.28
 -14  19   3 29781.3 1356.40
 -19   5  -3 27303.1 1561.97
  19  -5   3 30031.2 1797.18
 -19   5  -3 35066.6 2302.66
  -5 -14   3 25441.9 1900.36
   5  14  -3 32892.8 1664.24
   5  14  -6-172.669 248.482
  14 -19  -6 516.958 326.518
   5  14  -6 242.667 348.854
  19  -5   6 22.5390 255.009
 -14  19   6 780.735 515.871
 -19   5  -6 324.022 455.783
 -14  19   9 3585.38 875.362
  14 -19  -9 3757.23 852.493
   5  14  -9 5143.06 1042.11
  -5 -14   9 4166.52 1027.49
  19  -5   9 4698.16 991.589
 -19   5  -9 3634.99 1001.18
   5  14  -9 4671.50 909.747
  -4 -15  -7 7244.97 1033.09
  19  -4  -7 4880.41 712.254
 -19   4   7 4127.98 971.237
  15 -19   7 5611.97 1019.80
   4  15   7 5935.98 961.026
  19  -4  -7 4921.69 929.224
 -19   4   4 7159.19 909.762
  -4 -15  -4 7668.24 1024.69
   4  15   4 6310.98 684.955
 -15  19  -4 5783.92 993.489
   4  15   4 9867.65 1056.08
  19  -4  -4 7904.22 987.250
  15 -19   4 6909.51 1010.97
 -19   4   4 9186.20 1242.05
  -4 -15  -1 23325.1 1799.53
 -15  19  -1 17830.8 1629.80
  -4 -15  -1 21752.5 1491.43
 -15  19  -1 17627.5 1429.62
   4  15   1 20726.3 1316.78
  19  -4  -1 19412.9 1411.24
 -19   4   1 16274.0 1435.16
 -19   4   1 17828.9 1503.76
 -19   4  -2 1114.71 397.871
  15 -19  -2 768.802 196.363
   4  15  -2 1183.35 394.539
 -15  19   2 58.1843 288.365
 -15  19   2 609.761 283.232
  19  -4   2 971.554 376.146
  -4 -15   2 104.723 282.148
   4  15  -2 621.862 272.016
 -19   4  -2 701.205 431.208
  15 -19  -5 2101.69 452.562
 -19   4  -5 2207.02 386.971
   4  15  -5 3155.79 728.311
  -4 -15   5 1618.26 543.329
 -15  19   5 1947.54 632.628
  19  -4   5 2973.60 659.106
   4  15  -5 2493.05 532.985
 -19   4  -5 3605.99 857.386
   4  15  -8 589.750 365.789
  15 -19  -8 760.360 445.494
  -4 -15   8 1014.48 656.942
  19  -4   8 451.504 322.456
 -19   4  -8 245.072 421.622
 -15  19   8-332.734 416.210
  19  -3  -8 561.809 492.772
  16 -19   8 548.672 398.267
  -3 -16  -8-275.960 495.319
 -19   3   8 1565.77 701.107
 -16  19  -8 2174.01 856.341
 -19   3   5 28951.4 2258.45
  16 -19   5 30011.1 2130.09
  -3 -16  -5 32226.6 2064.26
 -19   3   5 30501.3 1929.17
   3  16   5 29547.5 1497.43
 -16  19  -5 29984.3 2241.20
   3  16   5 30236.7 1901.27
  19  -3  -5 30240.4 2019.78
  -3 -16  -2 30783.1 2025.45
 -16  19  -2 29802.5 2121.35
 -16  19  -2 30402.9 1972.39
   3  16   2 38157.2 1808.06
  19  -3  -2 34532.3 1968.15
 -19   3   2 36513.9 2135.69
 -19   3   2 31234.7 2080.63
  -3 -16  -2 35806.7 1854.11
 -19   3  -1 7778.14 927.343
 -19   3  -1 7200.77 1036.09
  -3 -16   1 9500.00 1105.17
   3  16  -1 7855.66 1014.91
 -16  19   1 7049.59 1068.25
 -16  19   1 7326.67 841.063
  19  -3   1 9714.25 1033.91
   3  16  -1 9285.11 835.181
  16 -19  -4 6997.18 748.572
   3  16  -4 6556.64 969.870
 -16  19   4 7749.66 1174.83
 -19   3  -4 8031.03 1175.03
  19  -3   4 7320.98 960.488
 -19   3  -4 6248.08 664.217
   3  16  -4 6641.94 757.745
  -3 -16   4 7175.68 1128.44
   3  16  -7 2807.93 566.635
  16 -19  -7 1869.62 552.980
   3  16  -7 3605.99 850.190
  -3 -16   7 3357.40 909.739
  19  -3   7 4844.63 899.173
 -16  19   7 4033.30 911.722
 -19   3  -7 2927.60 862.116
  19  -2  -9 602.779 522.604
  -2 -17  -9 515.175 581.203
 -19   2   9 392.978 585.248
 -17  19  -9-23.7948 667.854
  17 -19   9 1135.96 608.200
 -19   2   6 41690.0 2825.29
  -2 -17  -6 43638.7 2364.78
  17 -19   6 41392.9 2551.39
 -19   2   6 45077.6 2448.36
 -17  19  -6 42048.8 2813.43
   2  17   6 43819.9 2416.08
  19  -2  -6 51723.6 2732.41
 -19   2   3 4089.20 738.485
  -2 -17  -3 2379.44 614.960
 -19   2   3 1822.65 578.412
 -17  19  -3 2473.58 691.618
  -2 -17  -3 2946.33 543.379
 -17  19  -3 2719.84 668.749
   2  17   3 2587.61 518.657
  19  -2  -3 1907.01 524.114
   2  17   0 42958.8 2283.62
 -17  19   0 49377.7 2811.46
   2  17   0 49635.5 1919.63
  -2 -17   0 44930.2 2324.93
 -17  19   0 47633.5 2250.69
  19  -2   0 47043.0 2301.12
 -19   2   0 41392.1 2417.64
 -19   2   0 42794.2 2245.24
 -19   2  -3-33.3706 313.454
[truncated: 196,971 more chars]
